# Supplementary material
Source: PubMed Central journal article supplement (PMC10696561)

# Synthesis of Neocannabinoids Using Controlled Friedel-Crafts Reactions

Alexandra M. Millimaci, Richard V. Trilles, James McNeely, Lauren E. Brown, Aaron B. Beeler,\* and John A. Porco, Jr.\*

Department of Chemistry, Boston University, Boston, Massachusetts 02215, United States

\*E-mail: [beelera@bu.edu](mailto:beelera@bu.edu); [porco@bu.edu](mailto:porco@bu.edu)

## Table of Contents:

|                                                                                            |      |
|--------------------------------------------------------------------------------------------|------|
| General Information.....                                                                   | S2   |
| Experimental Procedures for Cyclic Allylic Alcohol Derivatives.....                        | S3   |
| Experimental Procedures for Neocannabinoid Isomers <i>via</i> Friedel-Crafts Reaction..... | S7   |
| i.    Acid-screening table for general neocannabinoid reaction                             |      |
| Experimental Procedure for Abnormal H <sub>2</sub> CBD Equilibration Reaction.....         | S9   |
| Cross-over Experimental and Identification of Product Ratio.....                           | S10  |
| Computational Studies.....                                                                 | S31  |
| References.....                                                                            | S181 |
| <sup>1</sup> H and <sup>13</sup> C, NMR Spectra of Reported Compounds.....                 | S183 |

## General Information:

### A. Instrumentation and Methods

$^1\text{H}$  NMR and  $^{13}\text{C}$  NMR spectra were recorded at ambient temperature on a Varian Agilent-500 MHz VNMRS (500 and 126 MHz, respectively), and are internally referenced to the residual protio solvent signal ( $\text{CDCl}_3$ :  $\delta$  7.26 and 77.0 ppm). Data for  $^1\text{H}$  NMR are reported as follows: chemical shift, integration, multiplicity (br s = broad singlet, s = singlet, d = doublet, t = triplet, q = quartet, m = multiplet, overlap = overlapping peaks) and coupling constants in Hz and data for  $^{13}\text{C}$  NMR are reported in terms of chemical shift. High resolution mass spectrometry data was obtained in the Boston University Chemical Instrumentation Center on a Waters Q-TOF (hybrid quadrupolar/time-of-flight) Premier system by electrospray (ESI) in the negative mode. Mass correction was done by an external reference using a Waters Lockspray accessory. Mobile phases were water and acetonitrile with 0.1% formic acid. The MS settings were capillary voltage = 3.2 or 3.0 kV, cone voltage = 10 or 35, source temperature = 120 °C and dissolution temperature = 350 °C [cone voltage = 10 and dissolution temperature = 120 °C if experiment was carried out in low T and low V]. Analytical LC-MS experiments were performed using a Waters Acquity UPLC (ultraperformance liquid chromatography) with a binary solvent *manager*, SQ mass spectrometer, Waters 2996 PDA (photodiode array) detector, and evaporative light scattering detector (ELSD). Organic solutions were concentrated under reduced pressure on a Büchi rotary evaporator using a water bath. Chromatographic purification of products was accomplished by flash chromatography on Silicycle F60 silica gel. All reactions were carried out in well ventilated fume hoods. Reactions were monitored by thin-layer chromatography (TLC) using Silicycle 250  $\mu\text{m}$  silica gel plates. Visualization of the developed chromatogram was performed by irradiation with a 254 nm Ultra-Violet (UV) light or treatment with iodine-silica chamber. Yields refer to purified compounds unless otherwise noted. Diastereoselectivity and regiochemical selectivity for reactions were determined by crude  $^1\text{H}$  NMR analysis prior to purification.

### B. Reagents and Solvents

Solvents methylene chloride, toluene, chloroform-d, and acetonitrile were purchased from Fischer Scientific. Commercial starting materials  $\alpha$ -phellandrene, 4-methylcyclohexanone, 4-t-butylcyclohexanone, 4,4-dimethylcyclohex-2-enone, cyclohept-2-en-1-one, orcinol, and methanesulfonic acid (MsOH) were purchased from Sigma Aldrich.  $\beta$ -pinene was purchased from Acros Organics. The commercial resorcinol reagents olivetol and divarinol were obtained from Shanghai Xishite Biosciences Co., Ltd. 5-(1,1-Dimethyl-heptyl)resorcinol was purchased from Oakwood Chemical.

## Experimental Procedures for Cyclic Allylic Alcohol Derivatives:

### Procedure A:

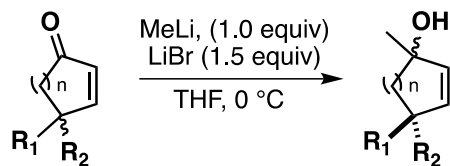

$n = 1,$   
 $n = 2,$   
 $n = 3$

$R_1 = \text{H}, R_2 = i\text{-Pr}$   
 $R_1 = R_2 = \text{H}$   
 $R_1 = \text{H}, R_2 = \text{CH}_3$   
 $R_1 = R_2 = \text{CH}_3$   
 $R_1 = \text{H}, R_2 = t\text{-Bu}$

To a flame dried round-bottom flask was added lithium bromide (7.80 mmol, 1.5 equiv) under an Ar balloon and the reaction was cooled to  $0\text{ }^\circ\text{C}$  with an ice bath. After cooling, THF (12 mL) and cyclic allylic ketone (5.20 mmol, 1.0 equiv) is added and the reaction was stirred. Methyl lithium in diethyl ether (1.5 M, 5.20 mL, 7.80 mmol, 1.5 equiv) was added dropwise and the reaction was stirred at  $0\text{ }^\circ\text{C}$  for 3 h or until full consumption of starting material was observed by TLC analysis. The reaction was then quenched with saturated  $\text{NH}_4\text{Cl}$  solution at  $0\text{ }^\circ\text{C}$  and was allowed to warm to room temperature. The resulting mixture was extracted with diethyl ether, dried over  $\text{Na}_2\text{SO}_4$ , and evaporated to afford the crude cyclic allylic alcohol without further purification.

### Procedure B:

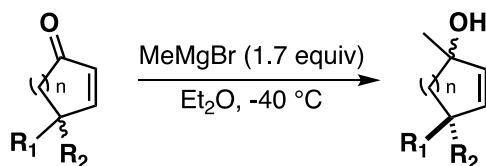

$n = 1,$   
 $n = 2,$   
 $n = 3$

$R_1 = \text{H}, R_2 = i\text{-Pr}$   
 $R_1 = R_2 = \text{H}$   
 $R_1 = \text{H}, R_2 = \text{CH}_3$   
 $R_1 = R_2 = \text{CH}_3$   
 $R_1 = \text{H}, R_2 = t\text{-Bu}$

To a flame dried round-bottom flask was added cyclic allylic ketone (3.22 mmol, 1.0 equiv) and dry diethyl ether (6.4 mL) under an Ar balloon. The solution was cooled to  $-40\text{ }^\circ\text{C}$  and was then added dropwise a solution of methyl magnesium bromide in ether (3.0 M, 1.7 equiv, 1.83 mL). The reaction was stirred until full consumption of starting material (3 h to overnight) by TLC analysis. The reaction was quenched with a saturated  $\text{NH}_4\text{Cl}$  solution and extracted with diethyl ether, dried over  $\text{Na}_2\text{SO}_4$ , and evaporated to afford the crude cyclic allylic alcohol which was used without further purification.

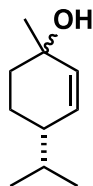

(±)-10

**trans-4-isopropyl-1-methylcyclohex-2-en-1-ol**

**Chemical Formula:** C<sub>10</sub>H<sub>18</sub>O

**Exact Mass:** 154.14

*Trans*-4-isopropyl-1-methylcyclohex-2-en-1-ol (**±-10**) was prepared as outlined in **Procedure A** and was isolated as a colorless oil and as a 5:1 (*trans/cis*) diastereomeric mixture (706 mg, 5.20 mmol, 88%).<sup>S4, S5, S11</sup> The physical and spectroscopic data of the mixture was consistent with the reported values.<sup>S4</sup>

<sup>1</sup>H NMR (400 MHz, CDCl<sub>3</sub>): δ 5.61 (s, 2H), 1.92 – 1.97 (m, 1H), 1.83 – 1.89 (m, 1H), 1.70 – 1.76 (m, 1H), 1.56 – 1.66 (m, 2H), 1.37–1.42 (m, 1H), 1.27 (s, 3H), 0.89 (d, *J* = 6.8 Hz, 3H), 0.87 (d, *J* = 6.8 Hz, 3H) (*trans*). <sup>13</sup>C NMR (100 MHz, CDCl<sub>3</sub>): δ 134.7, 131.4, 69.7, 41.8, 38.2, 31.9, 28.6, 23.7, 19.9, 19.5 (*trans*).

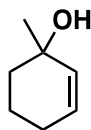

(±)-10c

**1-methylcyclohex-2-en-1-ol**

**Chemical Formula:** C<sub>7</sub>H<sub>12</sub>O

**Exact Mass:** 112.09

1-Methylcyclohex-2-en-1-ol (**±-10c**) was prepared as outlined in **Procedure B** and was isolated as a colorless oil (220 mg, 3.22 mmol, 61%).<sup>S1</sup> Physical and spectroscopic data were consistent with the reported values.<sup>S1</sup>

<sup>1</sup>H NMR (200 MHz, CDCl<sub>3</sub>): δ 5.75 (td, *J* = 4.0, 10.0 Hz, 1H), 5.60 (dm, *J* = 10.0 Hz, 1H), 2.10 (m, 2H), 1.50-1.80 (m, 5H), 1.29 (s, 3H). <sup>13</sup>C NMR (50 MHz, CDCl<sub>3</sub>): δ 133.7, 129.1, 67.9, 37.9, 29.3, 25.1, 19.6.

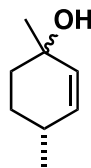

(±)-10d

**trans-1,4-dimethylcyclohex-2-en-1-ol**

**Chemical Formula:** C<sub>8</sub>H<sub>14</sub>O

**Exact Mass:** 126.10

*Trans*-1,4-dimethylcyclohex-2-en-1-ol (**±-10d**) was prepared as outlined in **Procedure A** and was isolated as a colorless oil and as a 3:1 (*trans/cis*) diastereomeric mixture (526 mg, 5.20 mmol, 80%).<sup>S10</sup> The physical and spectroscopic data of the mixture was consistent with the reported values.<sup>S10</sup>

$^1\text{H}$  NMR (400 MHz,  $\text{CDCl}_3$ ):  $\delta$  5.55 (s, 2H), 2.30-1.20 (m, 4H), 1.29 (s, 3H), 0.97 (d,  $J = 7.2$  Hz, 3H) (*trans*).  $^{13}\text{C}$  NMR (100 MHz,  $\text{CDCl}_3$ ):  $\delta$  134.3, 133.2, 68.9, 36.9, 28.9, 28.8, 27.9, 20.8 (*trans*).

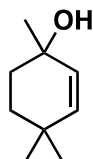

(+/-)-10e

1,4,4-trimethylcyclohex-2-en-1-ol

Chemical Formula:  $\text{C}_9\text{H}_{16}\text{O}$

Exact Mass: 140.12

1,4,4-Trimethylcyclohex-2-en-1-ol ( $\pm$ -10e) was prepared as outlined in **Procedure B** and was isolated as a colorless oil (360 mg, 3.22 mmol, 80%).<sup>S1</sup> Physical and spectroscopic data were consistent with the reported values.<sup>S2</sup>

$^1\text{H}$  NMR (300 MHz,  $\text{CDCl}_3$ ):  $\delta$  5.46 (m, 2H), 1.78-1.68 (m, 2H), 1.64-1.55 (m, 1H), 1.44 (s, 1H), 1.50-1.42 (m, 1H), 1.28 (s, 3H), 1.01 (s, 3H), 0.96 (s, 3H).  $^{13}\text{C}$  NMR (75.5 MHz,  $\text{CDCl}_3$ ):  $\delta$  139.4, 131.3, 68.2, 35.2, 34.2, 32.0, 29.8, 29.3, 28.3.

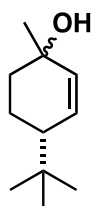

(+/-)-10f

*trans*-4-(*tert*-butyl)-1-methylcyclohex-2-en-1-ol

Chemical Formula:  $\text{C}_{11}\text{H}_{20}\text{O}$

Exact Mass: 168.15

*Trans*-4-(*tert*-butyl)-1-methylcyclohex-2-en-1-ol ( $\pm$ -10f) was prepared as outlined in **Procedure B** and isolated as a colorless solid and as a 98:2 (*trans/cis*) diastereomeric mixture (355 mg, 3.22 mmol, 66%).<sup>S1</sup> The physical and spectroscopic data of the mixture was consistent with the reported values.<sup>S3</sup>

$^1\text{H}$  NMR (100 MHz,  $\text{CDCl}_3$ ):  $\delta$  5.59 (br s, 2H), 1.21 (s, 3H), 0.88 (s, 9H) (*trans*).

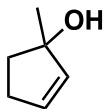

(+/-)-17

1-methylcyclopent-2-en-1-ol

Chemical Formula:  $\text{C}_6\text{H}_{10}\text{O}$

Exact Mass: 98.07

1-Methylcyclopent-2-en-1-ol ( $\pm$ -17) was prepared as outlined in **Procedure A** and isolated as a colorless oil (312 mg, 5.20 mmol, 61%).<sup>S8</sup> Physical and spectroscopic data was consistent with literature reported values.<sup>S8, S9</sup>

$^1\text{H}$  NMR (400 MHz,  $\text{CDCl}_3$ ):  $\delta$  5.83–5.81 (m, 1H), 5.70–5.69 (m, 1H), 2.51–2.45 (m, 1H), 2.35–2.29 (m, 1H), 1.98–1.89 (m, 2H), 1.68 (br s, 1H), 1.38 (s, 3H).  $^{13}\text{C}$  NMR (100 MHz,  $\text{CDCl}_3$ ):  $\delta$  137.9, 132.7, 83.4, 39.7, 31.1, 27.4.

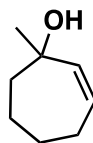

**(+/-)-20**

**1-methylcyclohept-2-en-1-ol**

**Chemical Formula:**  $\text{C}_8\text{H}_{14}\text{O}$

**Exact Mass:** 126.10

1-Methylcyclohept-2-en-1-ol ( **$\pm$ -20**) was prepared as outlined in **Procedure A** and isolated as a colorless oil (302 mg, 5.20 mmol, 46%).<sup>S6, S7</sup> The physical and spectroscopic data of the mixture was consistent with the reported values.<sup>S7</sup>

$^1\text{H}$  NMR (250.1 MHz,  $\text{CDCl}_3$ ):  $\delta$  5.64 (dm,  $J = 2.9$  Hz, 2H), 2.00–2.40 (m, 3H), 1.50–1.90 (m, 6H), 1.32 (d,  $J = 2.9$  Hz, 3H).  $^{13}\text{C}$  NMR (62.9 MHz,  $\text{CDCl}_3$ ):  $\delta$  139.7, 129.1, 74.0, 40.8, 28.6, 27.5, 27.3, 24.3.

## Experimental Procedures for Neocannabinoid Isomers *via* Friedel-Crafts Reaction:

### Procedure A:

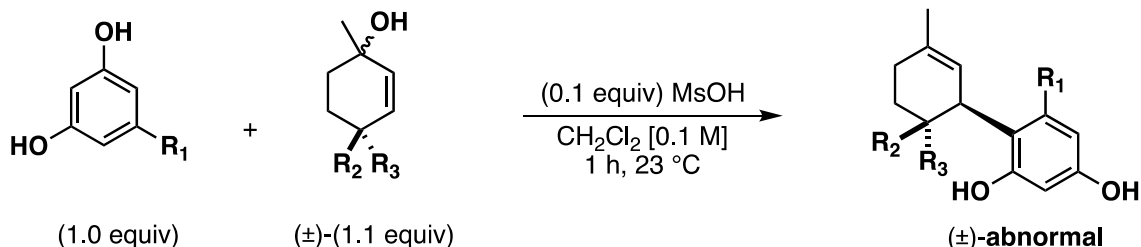

A scintillation vial was charged with resorcinol derivative (0.13 mmol, 1.0 equiv) and cyclic allylic alcohol (0.14 mmol, 1.1 equiv) along with a magnetic stir bar and the contents of the flask were dissolved in CH<sub>2</sub>Cl<sub>2</sub> [0.1 M]. To the stirred solution was added MsOH (0.1 M solution in CH<sub>2</sub>Cl<sub>2</sub>, 0.1 equiv) dropwise. The reaction was left to stir for 1 h and was then quenched with saturated NaHCO<sub>3</sub>, extracted 3x with CH<sub>2</sub>Cl<sub>2</sub> and dried over Na<sub>2</sub>SO<sub>4</sub>. The crude material was purified by silica gel column chromatography (10:1 up to 4:1 Hexanes/EtOAc) to provide the abnormal neocannabinoid derivative.

### Procedure B:

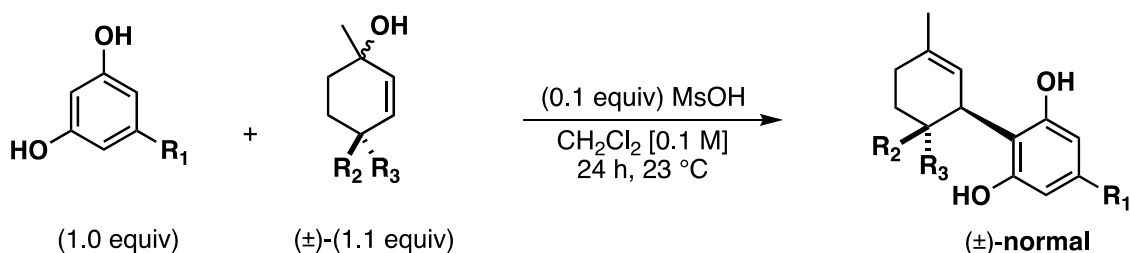

A scintillation vial was charged with resorcinol (0.13 mmol, 1.0 equiv) and cyclic allylic alcohol (0.14 mmol, 1.1 equiv) with a magnetic stir bar and the mixture was dissolved in CH<sub>2</sub>Cl<sub>2</sub> [0.1 M]. To the stirred solution was added MsOH (0.1 M solution in CH<sub>2</sub>Cl<sub>2</sub>, 0.1 equiv) dropwise. The reaction was stirred 24 h and then quenched with saturated NaHCO<sub>3</sub>, extracted 3 x with CH<sub>2</sub>Cl<sub>2</sub>, and dried over Na<sub>2</sub>SO<sub>4</sub>. The material was purified by column chromatography (silica gel, 20:1 up to 10:1 Hexanes/EtOAc) to provide the normal neocannabinoid derivative.

## Acid-screening table for general neocannabinoid reactions:

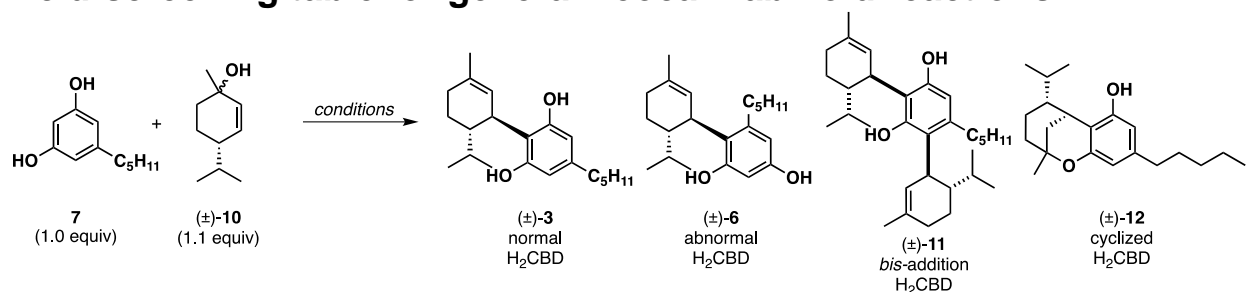

| entry      | acid                              | acid amount          | solvent                         | T (°C) | time (h) | Reaction mixture composition |          |          |           |           |
|------------|-----------------------------------|----------------------|---------------------------------|--------|----------|------------------------------|----------|----------|-----------|-----------|
|            |                                   |                      |                                 |        |          | conversion                   | <b>3</b> | <b>6</b> | <b>11</b> | <b>12</b> |
| <b>1a</b>  | Eu(OTf) <sub>3</sub>              | excess               | CH <sub>2</sub> Cl <sub>2</sub> | 0      | 0.5      | 50%                          | 5        | 2        | 1         |           |
| <b>1b</b>  |                                   |                      |                                 | rt     | 1        | 70%                          | 3        | 1        | 1         |           |
| <b>1c</b>  |                                   |                      |                                 | 40     | 3        | 71%                          | 3        | 1        | 1         |           |
| <b>2a</b>  | La(OTf) <sub>3</sub>              | excess               | CH <sub>2</sub> Cl <sub>2</sub> | 0      | 0.5      | 60%                          | 6        | 3        | 1         |           |
| <b>2b</b>  |                                   |                      |                                 | rt     | 1        | 70%                          | 3        | 1        | 1         |           |
| <b>2c</b>  |                                   |                      |                                 | 40     | 3        | 75%                          | 3        | 1        | 1         |           |
| <b>3a</b>  | La(OTf) <sub>3</sub>              | 20 mol%              | CH <sub>2</sub> Cl <sub>2</sub> | rt     | 0.5      | 25%                          | 2.5      | 1        |           |           |
| <b>3b</b>  |                                   |                      |                                 |        | 20       | 80%                          | 12.5     | 1        | 5         |           |
| <b>4a</b>  | Sc(OTf) <sub>3</sub>              | excess               | CH <sub>2</sub> Cl <sub>2</sub> | 0      | 0.5      | 70%                          | 3        | 1        | 1         |           |
| <b>4b</b>  |                                   |                      |                                 | rt     | 1        | 75%                          | 3        | 1        | 1         |           |
| <b>5a</b>  | Yb(OTf) <sub>3</sub>              | excess               | CH <sub>2</sub> Cl <sub>2</sub> | 0      | 0.5      | 70%                          | 3        | 2        | 1         |           |
| <b>5b</b>  |                                   |                      |                                 | rt     | 1        | 60%                          | 3        | 1        | 1         |           |
| <b>5c</b>  |                                   |                      |                                 | 40     | 3        | 71%                          | 3        | 1        | 1         |           |
| <b>6a</b>  | Yb(OTf) <sub>3</sub>              | 20 mol%              | CH <sub>2</sub> Cl <sub>2</sub> | rt     | 0.25     | 20%                          | 2.5      | 1        |           |           |
| <b>6b</b>  |                                   |                      |                                 |        | 0.5      | 25%                          | 2.5      | 1        |           |           |
| <b>6c</b>  |                                   |                      |                                 |        | 20       | 75%                          | 5        | 1        | 2         |           |
| <b>7</b>   | Yb(OTf) <sub>3</sub>              | 30 mol%              | CH <sub>2</sub> Cl <sub>2</sub> | rt     | 0.5      | 50%                          | 12       | 5        | 1         |           |
| <b>8</b>   | Ce(OTf) <sub>3</sub>              | excess               | CH <sub>2</sub> Cl <sub>2</sub> | rt     | 1        | 95%                          |          |          |           | 1         |
| <b>9</b>   | In(OTf) <sub>3</sub>              | excess               | CH <sub>2</sub> Cl <sub>2</sub> | rt     | 1        | 95%                          |          |          |           | 1         |
| <b>10</b>  | MsOH                              | 10 mol%              | CH <sub>2</sub> Cl <sub>2</sub> | rt     | 16       | 50%                          | 1        | 0        | 0         |           |
| <b>11</b>  | MsOH<br>+<br>Yb(OTf) <sub>3</sub> | 10 mol%<br>+ 20 mol% | CH <sub>2</sub> Cl <sub>2</sub> | rt     | 16       | 95%                          |          |          |           | 1         |
| <b>12</b>  | MsOH<br>+<br>La(OTf) <sub>3</sub> | 10 mol%<br>+ 20 mol% | CH <sub>2</sub> Cl <sub>2</sub> | rt     | 16       | 95%                          |          |          |           | 1         |
| <b>13a</b> | Schreiner's catalyst              | 10 mol%              | CH <sub>2</sub> Cl <sub>2</sub> | rt     | 16       | 65%                          | 5        | 7        | 1         |           |
| <b>13b</b> |                                   | 20 mol%              |                                 |        | 16       | 68%                          | 4        | 6        | 1         |           |



## Experimental Procedure for Equilibration of Abnormal 8,9-dihydrocannabidiol:

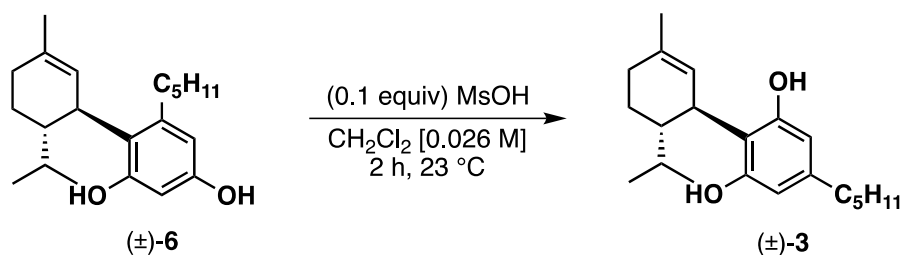

A scintillation vial with magnetic stir bar was charged with **6** (5 mg, 0.016 mmol, 1.0 equiv) and the contents of the flask was dissolved in CH<sub>2</sub>Cl<sub>2</sub> [0.026 M]. To the stirred solution was added MsOH (0.1 M solution in CH<sub>2</sub>Cl<sub>2</sub>, 16  $\mu$ L, 0.0016 mmol, 0.1 equiv) dropwise. After 2 h, the reaction was quenched with saturated NaHCO<sub>3</sub>, extracted 3 x with CH<sub>2</sub>Cl<sub>2</sub>, and dried over Na<sub>2</sub>SO<sub>4</sub>. Product regioselectivity was determined by crude <sup>1</sup>H NMR analysis.

## Crossover Experiment and Identification of Product Composition and Ratio:

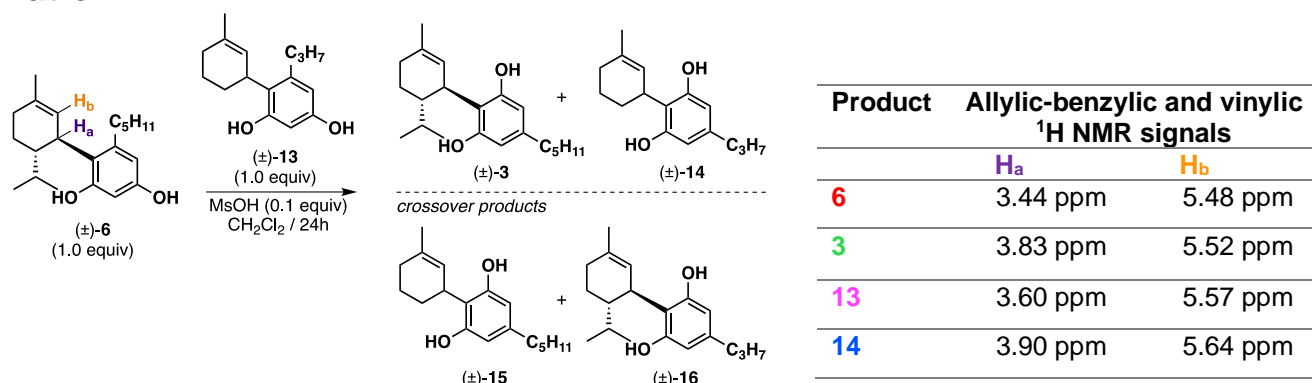

Using a combination of *in situ* <sup>1</sup>H NMR and LC/MS analyses, we monitored the ratios of the pure abnormal cannabinoids **6/13**, their corresponding normal isomers **3/14**, and crossover products **15/16**. Normal and abnormal cannabinoids can be distinguished by <sup>1</sup>H NMR analysis by examining the chemical shift of the H<sub>2</sub>CBD allylic-benzylic methine H<sub>a</sub> <sup>1</sup>H NMR signal, which appears further downfield in the normal vs. abnormal isomer; this trend of normal vs. abnormal cannabinoid derivatives was found to be consistent for other derivatives (*vide infra*). We therefore used these signature <sup>1</sup>H NMR chemical shifts to measure changes from abnormal to normal forms, and HPLC/MS to determine the existence of crossover products, as they differ in molecular weight from the starting structures **3** and **14**. By <sup>1</sup>H NMR analysis, we observed products **3** and **14** after 1 h with starting materials **6** and **13** still present; after 24 h we observe only trace amounts of **6** and **13**, and by LC/MS we obtained 26% of crossover products. *It should be noted that the crossover products NMR signals overlap with the other cannabinoids and HPLC/MS confirmed the molecular weight of all products observed.*

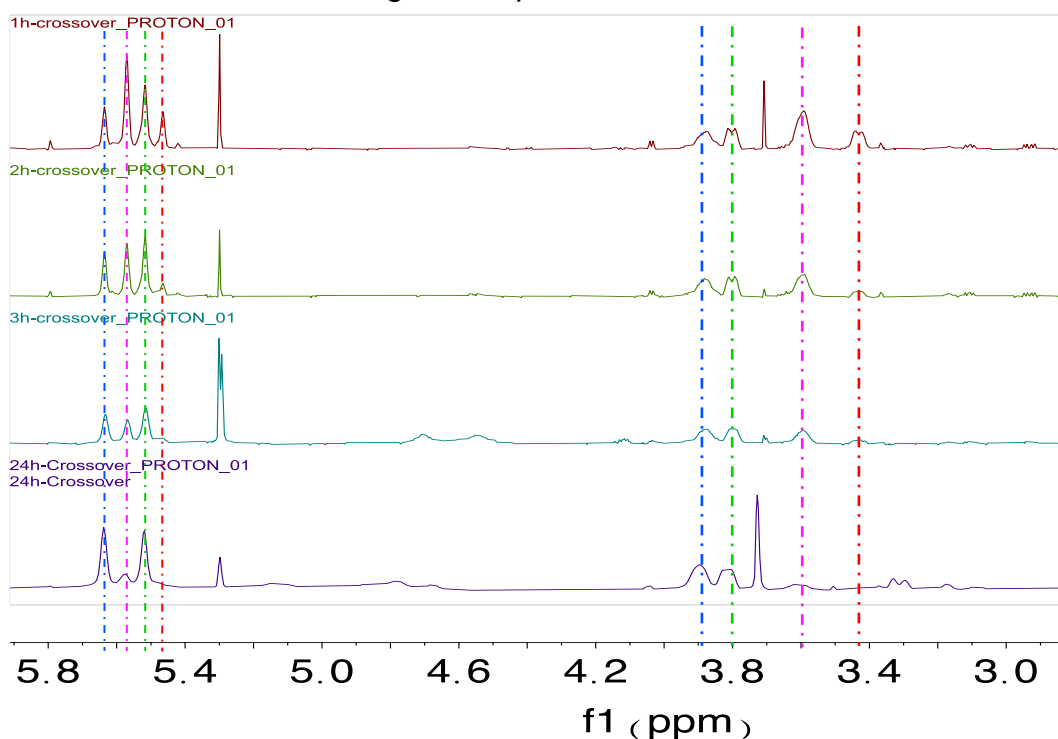

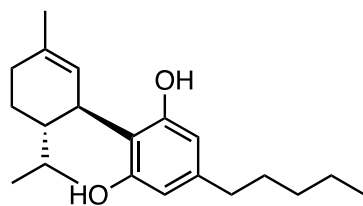

(±)-3

Chemical Formula: C<sub>21</sub>H<sub>32</sub>O<sub>2</sub>

Exact Mass: 316.24

Synthesis of (±)-3 from olivetol and (±)-10:

Reaction Time: 24 h

TLC: R<sub>f</sub> = 0.53 in 10:1 Hex/EtOAc, Stain = iodine

Physical State: yellowish oil

% Yield: 88% (36.0 mg)

<sup>1</sup>H NMR (500 MHz, CDCl<sub>3</sub>) δ 6.35 – 5.93 (m, 3H), 5.52 (s, 1H), 4.78 (br s, 1H), 3.82 (dtd, J = 9.0, 4.6, 2.4 Hz, 1H), 2.52 – 2.34 (m, 2H), 2.23 – 2.01 (m, 2H), 1.84 – 1.74 (m, 4H), 1.66 – 1.51 (m, 4H), 1.44 – 1.36 (m, 1H), 1.35 – 1.26 (m, 4H), 0.88 (dt, J = 14.0, 6.7 Hz, 9H).

<sup>13</sup>C{<sup>1</sup>H} NMR (126 MHz, CDCl<sub>3</sub>) δ 143.1, 140.2, 124.9, 114.1, 43.8, 35.6, 35.6, 31.7, 30.8, 30.8, 27.9, 23.8, 22.7, 22.2, 21.9, 16.5, 14.2.

HRMS-ESI (m/z): Calc. for C<sub>21</sub>H<sub>32</sub>O<sub>2</sub>: [M-H]<sup>+</sup> = 315.2324 ; found: 315.2318

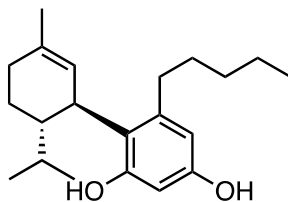

(±)-6

Chemical Formula: C<sub>21</sub>H<sub>32</sub>O<sub>2</sub>

Exact Mass: 316.24

Synthesis of (±)-6 from olivetol and (±)-10:

Reaction Time: 1 h

TLC: R<sub>f</sub> = 0.33 in 5:1 Hex/EtOAc, Stain = iodine

Physical State: yellow/orange oil

% Yield: 41% (17.0 mg)

<sup>1</sup>H NMR (500 MHz, CDCl<sub>3</sub>) δ 6.24 (d, J = 2.7 Hz, 1H), 6.21 (d, J = 2.7 Hz, 1H), 6.07 (s, 1H), 5.47 (d, J = 2.0 Hz, 1H), 4.81 (br s, 1H), 3.69 – 3.27 (m, 1H), 2.66 (ddd, J = 13.8, 9.4, 6.1 Hz, 1H), 2.34 (ddd, J = 13.8, 9.5, 6.8 Hz, 1H), 2.22 – 2.05 (m, 2H), 1.82 – 1.78 (m, 1H), 1.80 – 1.74 (m, 3H), 1.73 (dtd, J = 12.7, 10.4, 2.3 Hz, 1H), 1.56 – 1.46 (m, 3H), 1.40 – 1.35 (m, 1H), 1.34 – 1.29 (m, 4H), 0.94 – 0.87 (m, 3H), 0.83 (dd, J = 7.9, 6.9 Hz, 6H).

<sup>13</sup>C NMR (126 MHz, CDCl<sub>3</sub>) δ 156.7, 154.7, 144.2, 140.1, 125.3, 120.4, 108.7, 102.6, 43.1, 38.4, 34.4, 32.0, 31.4, 30.7, 27.4, 23.8, 22.7, 22.3, 22.1, 16.9, 14.2.

HRMS-ESI (m/z): Calc. for C<sub>21</sub>H<sub>32</sub>O<sub>2</sub>: [M-H]<sup>+</sup> = 315.2324 ; found: 315.2328

## Experimental Procedure for *Bis*-Addition and Stereochemistry Determination:

### Procedure A:

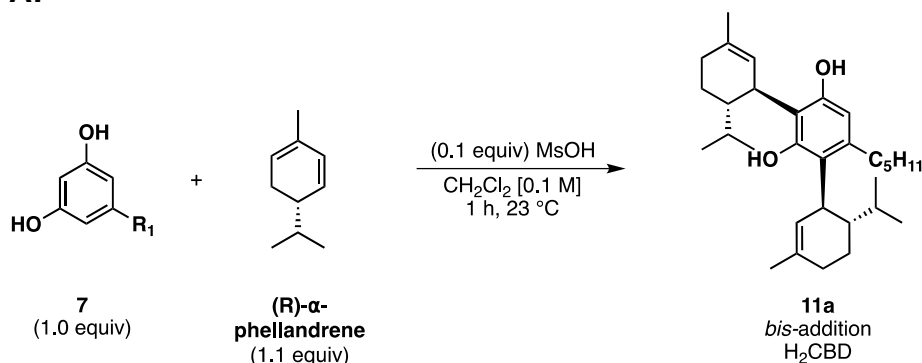

A scintillation vial was charged with olivetol **7** (1.0 equiv) and (1.1 equiv) (*R*)- $\alpha$ -phellandrene ( $\geq 95.0\%$  sum of enantiomers, GC) with a magnetic stir bar and the flask contents were dissolved in CH<sub>2</sub>Cl<sub>2</sub> [0.1 M]. To the stirred solution was added *p*-MsOH (0.1 M solution in CH<sub>2</sub>Cl<sub>2</sub>, 0.1 equiv) dropwise. The reaction was stirred for 1 h and was then quenched with saturated NaHCO<sub>3</sub>, extracted 3 x with CH<sub>2</sub>Cl<sub>2</sub>, and dried over Na<sub>2</sub>SO<sub>4</sub>. The material was purified by silica column chromatography (silica gel, 10:1 Hexanes/EtOAc) to provide *bis*-addition product **11a** as a single diastereomer.

### Procedure B:

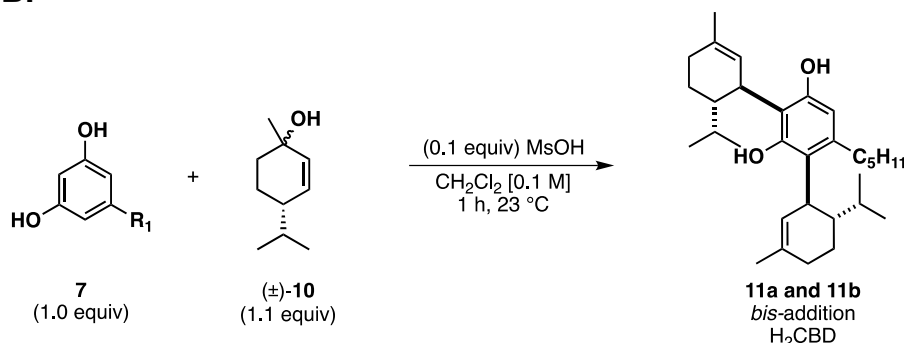

A scintillation vial was charged with olivetol **7** (1.0 equiv) and cyclic allylic alcohol **10** (1.1 equiv) and a magnetic stir bar and the contents of the flask was dissolved in CH<sub>2</sub>Cl<sub>2</sub> [0.1 M]. To the stirred solution was added MsOH (0.1 M solution in CH<sub>2</sub>Cl<sub>2</sub>, 0.1 equiv) dropwise. The reaction was stirred for 1 h then quenched with saturated NaHCO<sub>3</sub>, extracted 3 x with CH<sub>2</sub>Cl<sub>2</sub>, and dried over Na<sub>2</sub>SO<sub>4</sub>. The material was purified by column chromatography (silica gel, 10:1 Hexanes/EtOAc) to provide a mixture of diastereomeric *bis*-addition products **11a** and **11b**. The products were separated by prep-TLC (Silicycle 250  $\mu$ m silica gel plates, 10:1 Hexanes/Et<sub>2</sub>O) to determine each diastereomers stereochemistry. The first diastereomer was determined to be **11a** (*cf.* **Procedure A**) as its spectroscopic properties, <sup>1</sup>H, <sup>13</sup>C, and 1D NOESY matched the product obtained from the control reaction with (*R*)- $\alpha$ -phellandrene.

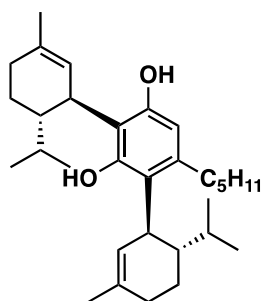

(±)-11a

Chemical Formula: C<sub>31</sub>H<sub>48</sub>O<sub>2</sub>

Exact Mass: 452.37

Compound (±)-11a from olivetol and (±)-10:

Reaction Time: 1 h

TLC: R<sub>f</sub> = 0.88 in 10:1 Hex/EtOAc, Stain = iodine

Physical State: orange/yellow oil

% Yield: 6% (3.5 mg) by-product

<sup>1</sup>H NMR (500 MHz, CDCl<sub>3</sub>) δ 6.24 (s, 1H), 6.00 (s, 1H), 5.93 (s, 1H), 5.60 – 5.53 (m, 1H), 5.51 (s, 1H), 3.99 – 3.56 (m, 1H), 3.43 (d, *J* = 10.4 Hz, 1H), 2.63 (ddd, *J* = 14.7, 9.4, 6.0 Hz, 1H), 2.32 (ddd, *J* = 13.9, 9.5, 6.9 Hz, 1H), 2.19 – 2.03 (m, 4H), 1.76 (dd, *J* = 10.0, 2.3 Hz, 8H), 1.57 – 1.42 (m, 6H), 1.39 – 1.30 (m, 6H), 0.92 – 0.86 (m, 3H), 0.81 (dd, *J* = 14.5, 6.9 Hz, 9H), 0.75 (d, *J* = 6.9 Hz, 3H).

<sup>13</sup>C{<sup>1</sup>H} NMR (126 MHz, CDCl<sub>3</sub>) δ 154.4, 154.3, 141.4, 140.1, 139.6, 125.4, 119.2, 115.8, 109.7, 44.0, 42.7, 39.0, 35.6, 34.3, 32.1, 31.5, 31.1, 31.0, 28.1, 27.5, 23.8, 23.8, 22.7, 22.6, 22.5, 22.0, 21.7, 16.9, 16.8, 14.2.

HRMS-ESI (*m/z*): Calc. for C<sub>31</sub>H<sub>48</sub>O<sub>2</sub>: [M-H]<sup>+</sup> = 451.3576 ; found: 451.3697

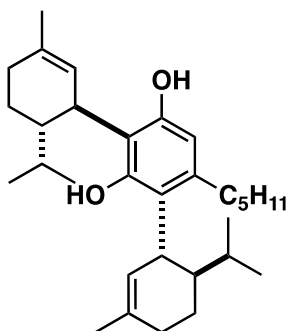

(±)-11b

Chemical Formula: C<sub>31</sub>H<sub>48</sub>O<sub>2</sub>

Exact Mass: 452.37

Synthesis of (±)-11b from olivetol and (±)-10:

Reaction Time: 1 h

TLC: R<sub>f</sub> = 0.80 in 10:1 Hex/EtOAc, Stain = iodine

Physical State: orange/yellow oil

% Yield: 6% (3.5 mg) by-product

<sup>1</sup>H NMR (500 MHz, CDCl<sub>3</sub>) δ 6.24 (s, 1H), 6.03 (s, 1H), 5.95 (s, 1H), 5.54 (s, 1H), 5.42 (s, 1H), 3.86 (d, *J* = 10.1 Hz, 1H), 3.44 (d, *J* = 10.2 Hz, 1H), 2.68 – 2.53 (m, 1H), 2.46 –

2.26 (m, 1H), 2.21 – 2.01 (m, 4H), 1.79 – 1.72 (m, 8H), 1.62 – 1.54 (m, 3H), 1.54 – 1.46 (m, 3H), 1.39 – 1.29 (m, 6H), 0.91 – 0.87 (m, 3H), 0.85 – 0.77 (m, 12H).

**<sup>13</sup>C{<sup>1</sup>H} NMR (126 MHz, CDCl<sub>3</sub>)** δ 154.4, 154.2, 141.3, 140.2, 139.4, 125.7, 125.6, 119.5, 116.1, 109.6, 43.8, 42.6, 38.8, 35.6, 34.2, 32.2, 31.2, 30.9, 30.8, 28.0, 27.5, 23.7, 23.6, 22.7, 22.4, 22.1, 21.8, 16.9, 16.6, 14.2.

**HRMS-ESI (m/z):** Calc. for C<sub>31</sub>H<sub>48</sub>O<sub>2</sub>: [M-H]<sup>+</sup> = 451.3576 ; found: 451.3700

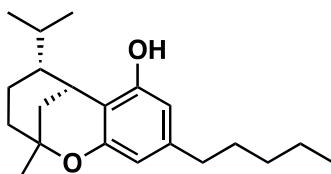

(±)-12

**Chemical Formula:** C<sub>21</sub>H<sub>32</sub>O<sub>2</sub>

**Exact Mass:** 316.24

Synthesis of (±)-12 from olivetol and (±)-10:

**TLC:** R<sub>f</sub> = 0.52 in 10:1 Hex/EtOAc, Stain = iodine

**Physical State:** orange/brown oil

**<sup>1</sup>H NMR (500 MHz, CDCl<sub>3</sub>)** δ 6.29 (d, *J* = 1.5 Hz, 1H), 6.12 (d, *J* = 1.5 Hz, 1H), 4.73 (s, 1H), 3.35 (q, *J* = 3.0 Hz, 1H), 2.45 (dd, *J* = 8.9, 6.7 Hz, 2H), 1.90 (dd, *J* = 13.3, 2.6 Hz, 1H), 1.83 (dp, *J* = 10.5, 6.6 Hz, 1H), 1.74 (dq, *J* = 13.3, 3.2 Hz, 1H), 1.62 – 1.54 (m, 4H), 1.53 – 1.49 (m, 2H), 1.35 (s, 3H), 1.34 – 1.26 (m, 5H), 1.10 (d, *J* = 6.6 Hz, 3H), 0.96 (d, *J* = 6.6 Hz, 3H), 0.89 (t, *J* = 6.8 Hz, 3H).

**<sup>13</sup>C NMR (126 MHz, CDCl<sub>3</sub>)** δ 157.5, 152.2, 142.5, 111.9, 107.9, 106.3, 74.7, 44.4, 35.8, 35.1, 31.7, 30.9, 30.7, 29.5, 27.9, 26.4, 22.7, 22.2, 21.2, 20.6, 14.2.

**HRMS-ESI (m/z):** Calc. for C<sub>21</sub>H<sub>32</sub>O<sub>2</sub>: [M-H]<sup>+</sup> = 315.2324 ; found: 315.2309

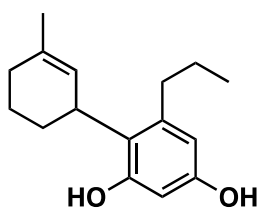

(±)-13

**Chemical Formula:** C<sub>16</sub>H<sub>22</sub>O<sub>2</sub>

**Exact Mass:** 246.16

Synthesis of 13 (abnormal isomer) from divarinol and (±)-10c:

**Reaction Time:** 1h

**TLC:** R<sub>f</sub> = R<sub>f</sub> = 0.24 in 5:1 Hex/EtOAc, Stain = iodine

**Physical State:** yellow/brown oil

**% Yield:** 43% (14.0 mg)

**<sup>1</sup>H NMR (500 MHz, CDCl<sub>3</sub>)** δ 6.24 (d, *J* = 2.7 Hz, 1H), 6.22 (d, *J* = 2.7 Hz, 1H), 6.17 (s, 1H), 5.58 (s, 1H), 4.82 (s, 1H), 3.66 – 3.50 (m, 1H), 2.54 (dt, *J* = 13.8, 7.8 Hz, 1H), 2.44 (dt, *J* = 13.7, 7.9 Hz, 1H), 2.19 – 2.08 (m, 1H), 2.05 – 1.98 (m, 1H), 1.95 – 1.82 (m, 2H), 1.78 (dt, *J* = 2.6, 1.2 Hz, 3H), 1.68 – 1.62 (m, 2H), 1.55 (q, *J* = 7.6 Hz, 2H), 0.97 (t, *J* = 7.3 Hz, 3H).

**<sup>13</sup>C NMR (126 MHz, CDCl<sub>3</sub>)** δ 156.8, 154.7, 142.6, 141.0, 124.4, 121.0, 109.0, 102.2, 36.2, 35.4, 29.9, 28.5, 24.9, 24.2, 23.0, 14.3.

**HRMS-ESI (m/z):** Calc. for C<sub>16</sub>H<sub>22</sub>O<sub>2</sub>: [M-H]<sup>+</sup> = 245.1542 ; found: 245.1540

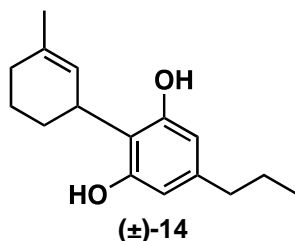

**Chemical Formula:** C<sub>16</sub>H<sub>22</sub>O<sub>2</sub>

**Exact Mass:** 246.16

Synthesis of (±)-14 from divarinol and (±)-10c:

**Reaction Time:** 24 h

**TLC:** R<sub>f</sub> = R<sub>f</sub> = 0.36 in 10:1 Hex/EtOAc, Stain = iodine

**Physical State:** yellow/brown oil

**% Yield:** 36% (11.5 mg)

**<sup>1</sup>H NMR (500 MHz, CDCl<sub>3</sub>)** δ 6.22 (s, 2H), 5.71 – 5.51 (m, 1H), 3.90 (ddt, *J* = 8.9, 6.0, 3.0 Hz, 1H), 2.43 (dd, *J* = 8.6, 6.8 Hz, 2H), 2.18 – 2.09 (m, 1H), 2.06 – 1.99 (m, 1H), 1.98 – 1.92 (m, 1H), 1.88 (dt, *J* = 13.4, 5.3, 2.9 Hz, 1H), 1.81 – 1.77 (m, 3H), 1.71 – 1.64 (m, 1H), 1.62 – 1.56 (m, 3H), 0.93 (t, *J* = 7.3 Hz, 3H).

**<sup>13</sup>C{<sup>1</sup>H} NMR (126 MHz, CDCl<sub>3</sub>)** δ 142.8, 141.2, 123.8, 114.6, 108.7, 37.7, 32.3, 30.1, 28.4, 24.3, 24.2, 22.5, 14.0.

**HRMS-ESI (m/z):** Calc. for C<sub>16</sub>H<sub>22</sub>O<sub>2</sub>: [M-H]<sup>+</sup> = 245.1542 ; found: 245.1537

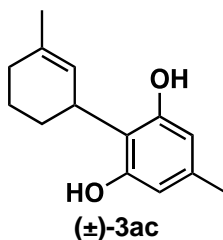

**Chemical Formula:** C<sub>14</sub>H<sub>18</sub>O<sub>2</sub>

**Exact Mass:** 218.13

Synthesis of (±)-3ac from orcinol and (±)-10c:

**Reaction Time:** 24 h

**TLC:** R<sub>f</sub> = 0.35 in 10:1 Hex/EtOAc, Stain = iodine

**Physical State:** yellow/orange oil

**% Yield:** 9% (2.5 mg)

**<sup>1</sup>H NMR (500 MHz, CDCl<sub>3</sub>)** δ 6.22 (s, 2H), 5.64 (dq, *J* = 2.9, 1.4 Hz, 1H), 3.91 (ddq, *J* = 8.9, 5.8, 2.8 Hz, 1H), 2.21 (s, 3H), 2.18 – 2.09 (m, 1H), 2.06 – 1.99 (m, 1H), 1.98 – 1.92 (m, 1H), 1.88 (dt, *J* = 13.6, 5.4, 2.9 Hz, 1H), 1.83 – 1.73 (m, 3H), 1.68 (tddd, *J* = 12.7, 10.1, 5.4, 2.5 Hz, 1H), 1.57 (tdd, *J* = 12.2, 9.6, 2.6 Hz, 1H).

**<sup>13</sup>C{<sup>1</sup>H} NMR (126 MHz, CDCl<sub>3</sub>)** δ 141.2, 137.9, 123.8, 114.4, 109.3, 32.3, 30.1, 28.4, 24.3, 22.5, 21.2.

**HRMS-ESI (m/z):** Calc. for C<sub>14</sub>H<sub>18</sub>O<sub>2</sub>: [M-H]<sup>+</sup> = 217.1229 ; found: 217.1206

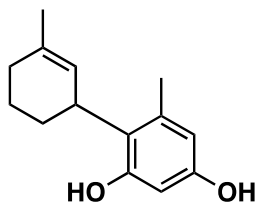

**(±)-6ac**

**Chemical Formula:** C<sub>14</sub>H<sub>18</sub>O<sub>2</sub>

**Exact Mass:** 218.13

Synthesis of **(±)-6ac** from orcinol and **(±)-10c**:

**Reaction Time:** 1 h

**TLC:** R<sub>f</sub> = 0.33 in 5:1 Hex/EtOAc, Stain = iodine

**Physical State:** orange/brown oil

**% Yield:** 35% (10.0 mg)

**<sup>1</sup>H NMR (500 MHz, CDCl<sub>3</sub>)** δ 6.28 (s, 1H), 6.27 – 6.22 (m, 1H), 6.22 (t, *J* = 1.9 Hz, 1H), 5.62 (s, 1H), 4.97 (s, 1H), 3.60 (s, 1H), 2.24 (s, 3H), 2.18 – 2.08 (m, 1H), 2.02 (dt, *J* = 17.9, 3.5 Hz, 1H), 1.94 – 1.84 (m, 2H), 1.79 (s, 3H), 1.70 – 1.61 (m, 1H), 1.60 – 1.50 (m, 1H).

**<sup>13</sup>C NMR (126 MHz, CDCl<sub>3</sub>)** δ 156.7, 154.6, 141.1, 138.0, 124.1, 121.2, 109.7, 102.1, 35.6, 30.0, 28.1, 24.2, 22.8, 20.4.

**HRMS-ESI (m/z):** Calc. for C<sub>14</sub>H<sub>18</sub>O<sub>2</sub>: [M-H]<sup>+</sup> = 217.1229 ; found: 217.1239

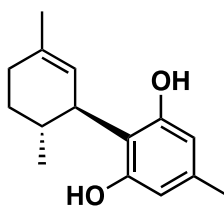

**(±)-3ad**

**Chemical Formula:** C<sub>15</sub>H<sub>20</sub>O<sub>2</sub>

**Exact Mass:** 232.15

Synthesis of **(±)-3ad** from orcinol and **(±)-10d**:

**Reaction Time:** 24 h

**TLC:** R<sub>f</sub> = 0.40 in 10:1 Hex/EtOAc, Stain = iodine

**Physical State:** yellow/orange oil

**% Yield:** 37% (11.3 mg)

**<sup>1</sup>H NMR (500 MHz, CDCl<sub>3</sub>)** δ 6.34 – 6.14 (m, 2H), 6.10 – 5.95 (m, 1H), 5.50 (dt, *J* = 2.9, 1.6 Hz, 1H), 4.77 (s, 1H), 3.52 (ddq, *J* = 9.0, 4.6, 2.4 Hz, 1H), 2.25 – 2.16 (m, 4H), 2.08 – 2.00 (m, 1H), 1.84 (ddt, *J* = 13.0, 5.4, 2.6 Hz, 1H), 1.79 – 1.73 (m, 4H), 1.45 (dtd, *J* = 14.1, 11.7, 5.4 Hz, 1H), 0.92 (d, *J* = 6.5 Hz, 3H).

**<sup>13</sup>C{<sup>1</sup>H} NMR (126 MHz, CDCl<sub>3</sub>)** δ 140.5, 138.0, 124.1, 113.7, 39.4, 33.6, 31.5, 30.6, 23.9, 21.2, 20.3.

**HRMS-ESI (m/z):** Calc. for C<sub>15</sub>H<sub>20</sub>O<sub>2</sub>: [M-H]<sup>+</sup> = 231.1385 ; found: 231.1412



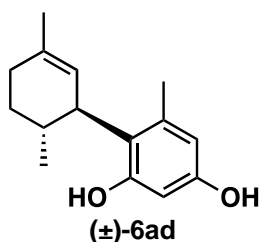

**(±)-6ad**  
**Chemical Formula:** C<sub>15</sub>H<sub>20</sub>O<sub>2</sub>  
**Exact Mass:** 232.15

Synthesis of **(±)-6ad** from orcinol and **(±)-10d**:

**Reaction Time:** 1 h

**TLC:** R<sub>f</sub> = 0.36 in 5:1 Hex/EtOAc, Stain = iodine

**Physical State:** orange/brown oil

**% Yield:** 50% (15.2 mg)

**<sup>1</sup>H NMR (500 MHz, CDCl<sub>3</sub>)** δ 6.28 – 6.19 (m, 2H), 6.05 (s, 1H), 5.49 (s, 1H), 4.96 (broad s, 1H), 3.29 – 3.18 (m, 1H), 2.23 (s, 3H), 2.21 – 2.16 (m, 1H), 2.09 – 1.99 (m, 1H), 1.88 – 1.81 (m, 2H), 1.77 (s, 3H), 1.48 – 1.40 (m, 1H), 0.87 (d, *J* = 6.4 Hz, 3H).

**<sup>13</sup>C NMR (126 MHz, CDCl<sub>3</sub>)** δ 156.5, 154.7, 140.3, 138.9, 124.4, 120.6, 109.7, 102.4, 42.6, 33.5, 31.6, 30.5, 23.8, 21.3, 20.4.

**HRMS-ESI (m/z):** Calc. for C<sub>15</sub>H<sub>20</sub>O<sub>2</sub>: [M-H]<sup>+</sup> = 231.1385 ; found: 231.1003

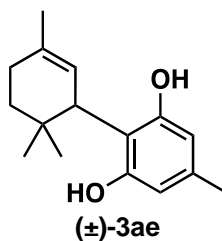

**(±)-3ae**  
**Chemical Formula:** C<sub>16</sub>H<sub>22</sub>O<sub>2</sub>  
**Exact Mass:** 246.16

Synthesis of **(±)-3ae** from orcinol and **(±)-10e**:

**Reaction Time:** 24 h

**TLC:** R<sub>f</sub> = 0.42 in 10:1 Hex/EtOAc, Stain = iodine

**Physical State:** yellow/orange oil

**% Yield:** 16% (5.2 mg)

**<sup>1</sup>H NMR (500 MHz, CDCl<sub>3</sub>)** δ 6.32 (s, 1H), 6.26 (s, 1H), 6.15 (s, 1H), 5.57 (s, 1H), 4.63 (s, 1H), 3.70-3.69 (apparent triplet, 1H), 2.21 (s, 3H), 2.20 – 2.12 (m, 1H), 2.12 – 2.00 (m, 1H), 1.80 (s, 3H), 1.68 – 1.57 (m, 1H), 1.56 – 1.46 (m, 1H), 1.00 (s, 3H), 0.82 (s, 3H).

**<sup>13</sup>C NMR (126 MHz, CDCl<sub>3</sub>)** δ 157.4, 154.3, 139.4, 138.0, 123.3, 111.1, 110.4, 108.0, 41.7, 35.7, 34.0, 29.1, 27.9, 23.8, 23.7, 21.0.

**HRMS-ESI (m/z):** Calc. for C<sub>16</sub>H<sub>22</sub>O<sub>2</sub>: [M-H]<sup>+</sup> = 245.1542 ; found: 245.1532

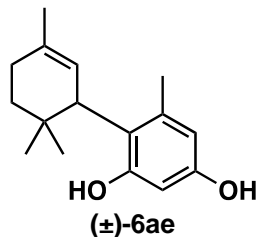

**Chemical Formula:** C<sub>16</sub>H<sub>22</sub>O<sub>2</sub>  
**Exact Mass:** 246.16

Synthesis of (±)-6ae from orcinol and (±)-10e:

**Reaction Time:** 1 h

**TLC:** R<sub>f</sub> = 0.47 in 5:1 Hex/EtOAc, Stain = iodine

**Physical State:** yellow/orange oil

**% Yield:** 33% (10.7 mg)

**<sup>1</sup>H NMR (500 MHz, CDCl<sub>3</sub>)** δ 6.35 (s, 1H), 6.26 (s, 1H), 6.19 (s, 1H), 5.56 (s, 1H), 4.78 (s, 1H), 3.44 (s, 1H), 2.27 (s, 3H), 2.19 – 2.14 (m, 1H), 2.12 – 2.03 (m, 1H), 1.80 (s, 3H), 1.72 – 1.65 (m, 1H), 1.57 – 1.47 (m, 1H), 0.99 (s, 3H), 0.78 (s, 3H).

**<sup>13</sup>C NMR (126 MHz, CDCl<sub>3</sub>)** δ 157.7, 154.6, 139.8, 139.4, 123.7, 118.2, 110.0, 102.1, 44.7, 36.1, 34.4, 29.8, 27.9, 24.6, 23.8, 22.0.

**HRMS-ESI (m/z):** Calc. for C<sub>16</sub>H<sub>22</sub>O<sub>2</sub>: [M-H]<sup>+</sup> = 245.1542 ; found: 245.1536

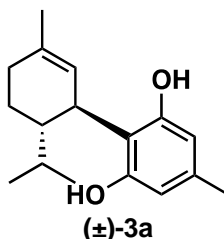

**Chemical Formula:** C<sub>17</sub>H<sub>24</sub>O<sub>2</sub>  
**Exact Mass:** 260.18

Synthesis of (±)-3a from orcinol and (±)-10:

**Reaction Time:** 24 h

**TLC:** R<sub>f</sub> = 0.44 in 10:1 Hex/EtOAc, Stain = iodine

**Physical State:** yellow/orange oil

**% Yield:** 47% (16.0 mg)

**<sup>1</sup>H NMR (500 MHz, CDCl<sub>3</sub>)** δ 6.34 – 5.92 (m, 2H), 5.51 (s, 1H), 4.68 (br s, 1H), 3.81 (apparent dt, *J* = 8.1, 2.1 Hz, 1H), 2.21 (s, 3H), 2.19 – 2.05 (m, 2H), 1.84 – 1.77 (m, 1H), 1.77 (s, 3H), 1.67 – 1.56 (m, 2H), 1.45 – 1.33 (m, 1H), 0.86 (apparent td, *J* = 6.0, 5.6, 1.0 Hz, 6H).

**<sup>13</sup>C{<sup>1</sup>H} NMR (126 MHz, CDCl<sub>3</sub>)** δ 140.2, 137.9, 124.9, 113.9, 110.7, 108.3, 43.8, 35.6, 30.8, 28.0, 23.8, 22.2, 21.9, 21.2, 16.5.

**HRMS-ESI (m/z):** Calc. for C<sub>17</sub>H<sub>24</sub>O<sub>2</sub>: [M-H]<sup>+</sup> = 259.1698 ; found: 259.1687

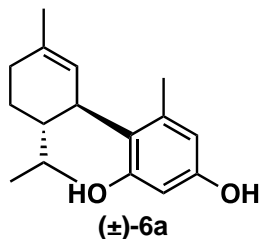

**Chemical Formula:** C<sub>17</sub>H<sub>24</sub>O<sub>2</sub>  
**Exact Mass:** 260.18

Synthesis of (±)-6a from orcinol and (±)-10:

**Reaction Time:** 1 h

**TLC:** R<sub>f</sub> = 0.31 in 5:1 Hex/EtOAc, Stain = iodine

**Physical State:** yellow/brown oil

**% Yield:** 40% (13.5 mg)

**<sup>1</sup>H NMR (500 MHz, CDCl<sub>3</sub>)** δ 6.25 – 6.16 (m, 2H), 6.07 (s, 1H), 5.48 (s, 1H), 4.58 (s, 1H), 3.46 (d, *J* = 10.4 Hz, 1H), 2.23 (s, 3H), 2.18 – 2.05 (m, 2H), 1.84 – 1.77 (m, 1H), 1.76 (s, 3H), 1.76 – 1.66 (m, 1H), 1.52 (tt, *J* = 8.0, 4.0 Hz, 1H), 1.35 (qd, *J* = 12.3, 5.5 Hz, 1H), 0.84 (dd, *J* = 6.9, 4.7 Hz, 6H).

**<sup>13</sup>C NMR (126 MHz, CDCl<sub>3</sub>)** δ 156.5, 154.7, 140.0, 139.0, 125.1, 120.8, 109.8, 102.6, 43.2, 38.8, 30.7, 27.5, 23.7, 22.3, 22.0, 21.2, 16.8.

**HRMS-ESI (m/z):** Calc. for C<sub>17</sub>H<sub>24</sub>O<sub>2</sub>: [M-H]<sup>+</sup> = 259.1698 ; found: 259.1705

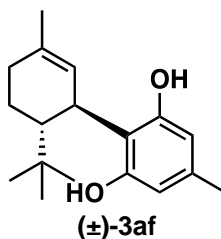

**Chemical Formula:** C<sub>18</sub>H<sub>26</sub>O<sub>2</sub>  
**Exact Mass:** 274.19

Synthesis of (±)-3af from orcinol and (±)-10f:

**Reaction Time:** 24 h

**TLC:** R<sub>f</sub> = 0.44 in 10:1 Hex/EtOAc, Stain = iodine

**Physical State:** yellow/brown oil

**% Yield:** 51% (18.3 mg)

**<sup>1</sup>H NMR (500 MHz, CDCl<sub>3</sub>)** δ 6.20 (brd, *J* = 66.0 Hz, 2H), 5.79 (br s, 1H), 5.34 (s, 1H), 4.86 (br s, 1H), 3.95 – 3.88 (m, 1H), 2.20 (s, 3H), 2.16 – 2.10 (m, 1H), 2.08 (d, *J* = 3.2 Hz, 1H), 2.08 – 1.97 (m, 01), 1.77 (ddd, *J* = 11.9, 9.1, 2.8 Hz, 1H), 1.73 (s, 3H), 1.46 (dtd, *J* = 12.5, 10.9, 4.9 Hz, 1H), 0.83 (apparent s, 9H).

**<sup>13</sup>C{<sup>1</sup>H} NMR (126 MHz, CDCl<sub>3</sub>)** δ 156.3, 153.1, 138.2, 137.8, 125.9, 116.8, 111.0, 108.8, 46.5, 34.1, 34.0, 30.8, 28.6, 25.1, 23.4, 21.1.

**HRMS-ESI (m/z):** Calc. for C<sub>18</sub>H<sub>26</sub>O<sub>2</sub>: [M-H]<sup>+</sup> = 273.1855 ; found: 273.1842

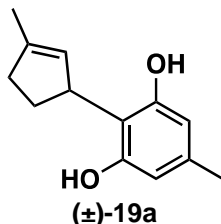

**Chemical Formula:** C<sub>13</sub>H<sub>16</sub>O<sub>2</sub>

**Exact Mass:** 204.12

Synthesis of **(±)-19a** from orcinol and **(±)-17**:

**Reaction Time:** 24 h

**TLC:** R<sub>f</sub> = 0.24 in 10:1 Hex/EtOAc, Stain = iodine

**Physical State:** yellow/orange oil

**% Yield:** 9% (2.4 mg)

**<sup>1</sup>H NMR (500 MHz, CDCl<sub>3</sub>)** δ 6.22 (s, 2H), 5.61 (s, 2H), 5.57 (s, 1H), 4.43 (ddq, *J* = 8.6, 6.1, 2.8 Hz, 1H), 2.56 – 2.40 (m, 3H), 2.20 (s, 3H), 1.88 – 1.85 (m, 4H).

**<sup>13</sup>C{<sup>1</sup>H} NMR (126 MHz, CDCl<sub>3</sub>)** δ 155.2, 147.3, 137.9, 126.7, 113.8, 109.3, 40.9, 37.5, 31.5, 21.1, 17.1.

**HRMS-ESI (m/z):** Calc. for C<sub>13</sub>H<sub>16</sub>O<sub>2</sub>: [M-H]<sup>+</sup> = 203.1072 ; found: 203.0864

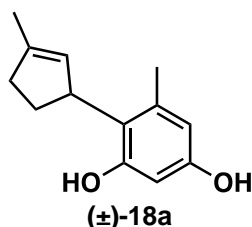

**Chemical Formula:** C<sub>13</sub>H<sub>16</sub>O<sub>2</sub>

**Exact Mass:** 204.12

Synthesis of **(±)-18a** from orcinol and **(±)-17**:

**Reaction Time:** 1 h

**TLC:** R<sub>f</sub> = 0.33 in 5:1 Hex/EtOAc, Stain = iodine

**Physical State:** yellow/orange oil

**% Yield:** 9% (2.5 mg)

**<sup>1</sup>H NMR (400 MHz, CDCl<sub>3</sub>)** δ 6.30 (s, 1H), 6.25 – 6.19 (m, 2H), 5.58 (s, 1H), 4.16 (qt, *J* = 6.0, 2.7 Hz, 1H), 2.55 – 2.37 (m, 3H), 2.25 (s, 3H), 1.86 (s, 3H), 1.83 – 1.78 (m, 1H).

**<sup>13</sup>C NMR (101 MHz, CDCl<sub>3</sub>)** δ 157.1, 154.7, 147.3, 137.9, 127.1, 120.4, 109.5, 102.0, 44.5, 37.5, 31.2, 20.7, 17.1.

**HRMS-ESI (m/z):** Calc. for C<sub>13</sub>H<sub>16</sub>O<sub>2</sub>: [M-H]<sup>+</sup> = 203.1072 ; found: 203.0865

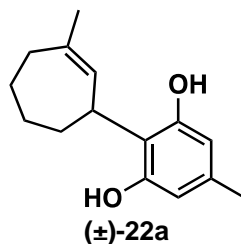

**Chemical Formula:** C<sub>15</sub>H<sub>20</sub>O<sub>2</sub>

**Exact Mass:** 232.15

Synthesis of ( $\pm$ )-**22a** from orcinol and ( $\pm$ )-**20**:

**Reaction Time:** 24 h

**TLC:** R<sub>f</sub> = 0.28 in 10:1 Hex/EtOAc, Stain = iodine

**Physical State:** yellow/brown oil

**% Yield:** 17% (5.2 mg)

**<sup>1</sup>H NMR (500 MHz, CDCl<sub>3</sub>)**  $\delta$  6.24 (s, 2H), 5.55 (s, 1H), 5.41 (s, 1H), 4.03 (d, *J* = 8.5 Hz, 1H), 2.36 – 2.27 (m, 1H), 2.25 – 2.21 (m, 1H), 2.20 (s, 3H), 1.97 – 1.89 (m, 2H), 1.88 – 1.82 (m, 1H), 1.80 (s, 3H), 1.78 – 1.74 (m, 1H), 1.69 – 1.61 (m, 1H), 1.60 – 1.50 (m, 1H).

**<sup>13</sup>C NMR (126 MHz, CDCl<sub>3</sub>)**  $\delta$  154.2, 143.6, 137.6, 127.7, 116.9, 109.4, 36.0, 33.9, 32.9, 29.2, 27.6, 26.6, 21.1.

**HRMS-ESI (m/z):** Calc. for C<sub>15</sub>H<sub>20</sub>O<sub>2</sub>: [M-H]<sup>+</sup> = 231.1385 ; found: 231.1381

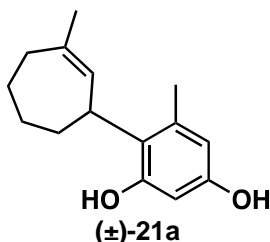

**Chemical Formula:** C<sub>15</sub>H<sub>20</sub>O<sub>2</sub>

**Exact Mass:** 232.15

Synthesis of ( $\pm$ )-**21a** from orcinol and ( $\pm$ )-**20**:

**Reaction Time:** 1 h

**TLC:** R<sub>f</sub> = 0.21 in 5:1 Hex/EtOAc, Stain = iodine

**Physical State:** orange/brown oil

**% Yield:** 30% (9.1 mg)

**<sup>1</sup>H NMR (500 MHz, CDCl<sub>3</sub>)**  $\delta$  6.25 (s, 2H), 5.75 (s, 1H), 5.53 (s, 1H), 5.33 (s, 1H), 3.72 (d, *J* = 11.3 Hz, 1H), 2.31 (dd, *J* = 16.1, 8.1 Hz, 1H), 2.24 (s, 3H), 2.21 – 2.15 (m, 1H), 1.98 – 1.90 (m, 2H), 1.89 – 1.82 (m, 1H), 1.80 (s, 3H), 1.73 – 1.65 (m, 1H), 1.63 – 1.49 (m, 2H).

**<sup>13</sup>C{<sup>1</sup>H} NMR (126 MHz, CDCl<sub>3</sub>)**  $\delta$  155.6, 154.3, 143.4, 137.0, 128.0, 124.0, 109.9, 102.0, 39.2, 34.1, 33.0, 29.6, 27.6, 26.6, 20.7.

**HRMS-ESI (m/z):** Calc. for C<sub>15</sub>H<sub>20</sub>O<sub>2</sub>: [M-H]<sup>+</sup> = 231.1385 ; found: 231.1376

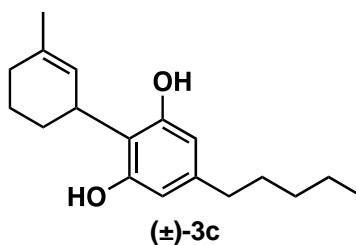

**Chemical Formula:** C<sub>18</sub>H<sub>26</sub>O<sub>2</sub>

**Exact Mass:** 274.19

Synthesis of ( $\pm$ )-**3c** from olivetol and ( $\pm$ )-**10c**:

**Reaction Time:** 24 h

**TLC:**  $R_f$  = 0.45 in 10:1 Hex/EtOAc, Stain= iodine

**Physical State:** yellow/orange oil

**% Yield:** 43% (15.5 mg)

**$^1\text{H NMR}$  (500 MHz,  $\text{CDCl}_3$ )**  $\delta$  6.22 (s, 2H), 5.64 (s, 1H), 3.90 (ddt,  $J$  = 8.8, 5.9, 2.9 Hz, 1H), 2.44 (dd,  $J$  = 8.9, 6.8 Hz, 2H), 2.18 – 2.07 (m, 1H), 2.06 – 1.98 (m, 1H), 1.99 – 1.91 (m, 1H), 1.93 – 1.84 (m, 1H), 1.79 (s, 3H), 1.73 – 1.61 (m, 1H), 1.63 – 1.50 (m, 3H), 1.37 – 1.26 (m, 4H), 0.89 (t,  $J$  = 6.8 Hz, 3H).

**$^{13}\text{C}\{^1\text{H}\}$  NMR (126 MHz,  $\text{CDCl}_3$ )**  $\delta$  143.1, 141.2, 123.8, 114.6, 108.6, 35.6, 32.3, 31.7, 30.9, 30.1, 28.4, 24.3, 22.7, 22.5, 14.2.

**HRMS-ESI (m/z):** Calc. for  $\text{C}_{18}\text{H}_{26}\text{O}_2$ :  $[\text{M}-\text{H}]^+ = 273.1855$  ; found: 273.1842

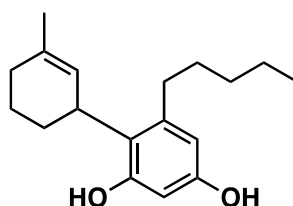

( $\pm$ )-**6c**

**Chemical Formula:**  $\text{C}_{18}\text{H}_{26}\text{O}_2$

**Exact Mass:** 274.19

Synthesis of ( $\pm$ )-**6c** from olivetol and ( $\pm$ )-**10c**:

**Reaction Time:** 1 h

**TLC:**  $R_f$  = 0.39 in 5:1 Hex/EtOAc, Stain= iodine

**Physical State:** orange/brown oil

**% Yield:** 50% (18.0 mg)

**$^1\text{H NMR}$  (500 MHz,  $\text{CDCl}_3$ )**  $\delta$  6.26 – 6.21 (m, 2H), 6.19 (s, 1H), 5.58 (br s, 1H), 5.11 (s, 1H), 3.60 (s, 1H), 2.55 (dt,  $J$  = 13.7, 7.8 Hz, 1H), 2.46 (dt,  $J$  = 14.4, 8.0 Hz, 1H), 2.21 – 2.09 (m, 1H), 2.05 – 1.98 (m, 1H), 1.97 – 1.83 (m, 2H), 1.78 (s, 3H), 1.68 – 1.60 (m, 2H), 1.52 (p,  $J$  = 7.4 Hz, 2H), 1.37 – 1.27 (m, 4H), 0.96 – 0.83 (m, 3H).

**$^{13}\text{C}$  NMR (126 MHz,  $\text{CDCl}_3$ )**  $\delta$  156.8, 154.7, 142.9, 140.9, 124.3, 120.9, 109.0, 102.2, 35.3, 34.1, 32.0, 31.5, 29.9, 28.6, 24.2, 23.0, 22.7, 14.2.

**HRMS-ESI (m/z):** Calc. for  $\text{C}_{18}\text{H}_{26}\text{O}_2$ :  $[\text{M}-\text{H}]^+ = 273.1855$  ; found: 273.1859

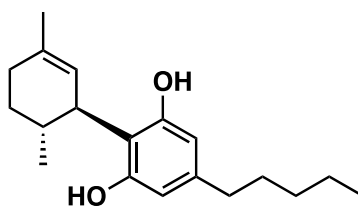

( $\pm$ )-**3d**

**Chemical Formula:**  $\text{C}_{19}\text{H}_{28}\text{O}_2$

**Exact Mass:** 288.21

Synthesis of ( $\pm$ )-**3d** from olivetol and ( $\pm$ )-**10d**:

**Reaction Time:** 24 h

**TLC:**  $R_f = 0.52$  in 10:1 Hex/EtOAc, Stain= iodine

**Physical State:** yellow/brown oil

**% Yield:** 56% (21.0 mg)

**$^1\text{H NMR}$  (500 MHz,  $\text{CDCl}_3$ )**  $\delta$  6.37 – 5.91 (m, 3H), 5.52 (s, 1H), 4.75 (br s, 1H), 3.52 (ddq,  $J = 9.1, 4.6, 2.4$  Hz, 1H), 2.45 (dd,  $J = 8.8, 6.8$  Hz, 2H), 2.27 – 2.15 (m, 1H), 2.11 – 1.97 (m, 1H), 1.84 (ddt,  $J = 13.0, 5.4, 2.5$  Hz, 1H), 1.80 – 1.74 (m, overlap, 4H), 1.62 – 1.52 (m, 2H), 1.45 (qd,  $J = 11.9, 5.3$  Hz, 1H), 1.37 – 1.27 (m, 4H), 0.92 (d,  $J = 6.5$  Hz, 3H), 0.89 (t,  $J = 6.9$  Hz, 3H).

**$^{13}\text{C}\{^1\text{H}\}$  NMR (126 MHz,  $\text{CDCl}_3$ )**  $\delta$  143.1, 140.4, 124.1, 113.9, 39.5, 35.6, 33.6, 31.7, 31.5, 30.8, 30.6, 23.8, 22.7, 20.4, 14.2.

**HRMS-ESI (m/z):** Calc. for  $\text{C}_{19}\text{H}_{28}\text{O}_2$ :  $[\text{M}-\text{H}]^+ = 287.2011$  ; found: 287.2002

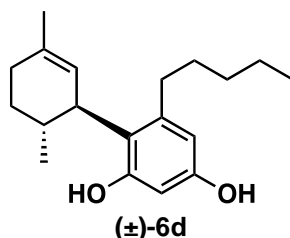

(±)-6d

**Chemical Formula:**  $\text{C}_{19}\text{H}_{28}\text{O}_2$

**Exact Mass:** 288.21

Synthesis of (±)-6d from olivetol and (±)-10d:

**Reaction Time:** 1 h

**TLC:**  $R_f = 0.36$  in 5:1 Hex/EtOAc, Stain= iodine

**Physical State:** orange/brown oil

**% Yield:** 37% (14.0 mg)

**$^1\text{H NMR}$  (500 MHz,  $\text{CDCl}_3$ )**  $\delta$  6.24 (d,  $J = 2.7$  Hz, 1H), 6.21 (d,  $J = 2.7$  Hz, 1H), 6.00 (s, 1H), 5.47 (s, 1H), 3.23 (ddq,  $J = 9.2, 4.7, 2.5$  Hz, 1H), 2.69 (ddd,  $J = 13.9, 8.9, 6.5$  Hz, 1H), 2.43 – 2.27 (m, 1H), 2.27 – 2.16 (m, 1H), 2.09 – 2.01 (m, 1H), 1.89 – 1.81 (m, 2H), 1.77 (s, 3H), 1.52 – 1.46 (m, 2H), 1.43 (dd,  $J = 12.6, 5.4$  Hz, 1H), 1.34 – 1.30 (m, 4H), 0.90 (t,  $J = 7.0$  Hz, 3H), 0.86 (d,  $J = 6.4$  Hz, 3H).

**$^{13}\text{C NMR}$  (126 MHz,  $\text{CDCl}_3$ )**  $\delta$  156.7, 154.7, 144.0, 140.3, 124.5, 120.0, 108.7, 102.4, 42.3, 34.4, 33.2, 32.0, 31.7, 31.3, 30.6, 23.8, 22.7, 20.5, 14.2.

**HRMS-ESI (m/z):** Calc. for  $\text{C}_{19}\text{H}_{28}\text{O}_2$ :  $[\text{M}-\text{H}]^+ = 287.2011$  ; found: 287.2890

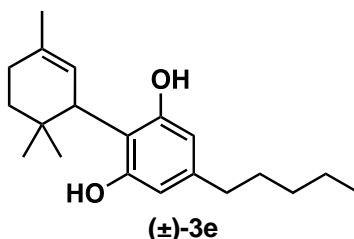

(±)-3e

**Chemical Formula:**  $\text{C}_{20}\text{H}_{30}\text{O}_2$

**Exact Mass:** 302.22

Synthesis of (±)-3e from olivetol and (±)-10e:

**Reaction Time:** 24 h

**TLC:**  $R_f = 0.50$  in 10:1 Hex/EtOAc, Stain= iodine

**Physical State:** yellow/brown oil

**% Yield:** 18% (7.2 mg)

**$^1\text{H NMR}$  (500 MHz,  $\text{CDCl}_3$ )**  $\delta$  6.33 (s, 1H), 6.27 (s, 1H), 6.15 (s, 1H), 5.62 – 5.51 (m, 1H), 4.65 (s, 1H), 3.71 – 3.66 (m, 1H), 2.45 (t,  $J = 7.8$  Hz, 2H), 2.23 – 2.11 (m, 1H), 2.11 – 1.95 (m, 1H), 1.80 (s, 3H), 1.64 (dt,  $J = 12.2, 6.0$  Hz, 2H), 1.52 (dt,  $J = 13.4, 6.7$  Hz, 2H), 1.34 – 1.28 (m, 4H), 1.00 (s, 3H), 0.89 (t,  $J = 6.7$  Hz, 3H), 0.82 (s, 3H).

**$^{13}\text{C NMR}$  (126 MHz,  $\text{CDCl}_3$ )**  $\delta$  157.5, 154.4, 143.3, 139.5, 123.5, 111.4, 109.8, 107.5, 41.9, 35.8, 35.6, 34.1, 31.7, 30.8, 29.2, 28.1, 24.0, 23.8, 22.7, 14.2.

**HRMS-ESI (m/z):** Calc. for  $\text{C}_{20}\text{H}_{30}\text{O}_2$ :  $[\text{M}-\text{H}]^+ = 301.2168$  ; found: 301.2160

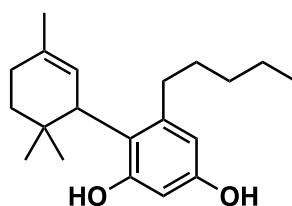

(±)-6e

**Chemical Formula:**  $\text{C}_{20}\text{H}_{30}\text{O}_2$

**Exact Mass:** 302.22

Synthesis of (±)-6e from olivetol and (±)-10e:

**Reaction Time:** 1 h

**TLC:**  $R_f = 0.48$  in 5:1 Hex/EtOAc, Stain= iodine

**Physical State:** orange/brown oil

**% Yield:** 24% (9.5 mg)

**$^1\text{H NMR}$  (500 MHz,  $\text{CDCl}_3$ )**  $\delta$  6.41 (s, 1H), 6.26 (d,  $J = 2.7$  Hz, 1H), 6.18 (d,  $J = 2.7$  Hz, 1H), 5.63 – 5.36 (m, 1H), 4.93 (s, 1H), 3.43 (t,  $J = 2.9$  Hz, 1H), 2.75 (dt,  $J = 13.9, 7.7$  Hz, 1H), 2.37 (dt,  $J = 13.8, 8.1$  Hz, 1H), 2.20 – 2.12 (m, 1H), 2.13 – 2.08 (m, 1H), 1.81 – 1.79 (m, 3H), 1.70 (dt,  $J = 13.1, 6.4$  Hz, 1H), 1.53 – 1.44 (m, 3H), 1.32 (qd,  $J = 6.3, 3.6$  Hz, 4H), 1.00 (s, 3H), 0.93 – 0.86 (m, 3H), 0.75 (s, 3H).

**$^{13}\text{C NMR}$  (126 MHz,  $\text{CDCl}_3$ )**  $\delta$  157.7, 154.8, 145.0, 139.5, 123.8, 117.3, 109.0, 102.0, 44.1, 35.9, 34.8, 34.0, 32.0, 31.5, 29.7, 27.9, 25.1, 23.8, 22.7, 14.2.

**HRMS-ESI (m/z):** Calc. for  $\text{C}_{20}\text{H}_{30}\text{O}_2$ :  $[\text{M}-\text{H}]^+ = 301.2168$  ; found: 301.2152

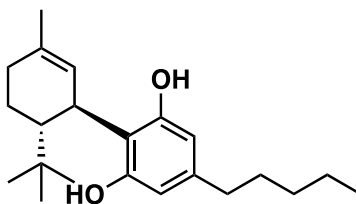

(±)-3f

**Chemical Formula:**  $\text{C}_{22}\text{H}_{34}\text{O}_2$

**Exact Mass:** 330.26

Synthesis of (±)-3f from olivetol and (±)-10f:

**Reaction Time:** 24 h

**TLC:**  $R_f = 0.52$  in 10:1 Hex/EtOAc, Stain= iodine



**Physical State:** orange/brown oil

**% Yield:** 75% (32.3 mg)

**<sup>1</sup>H NMR (500 MHz, CDCl<sub>3</sub>)** δ 6.32 – 6.06 (m, 2H), 5.82 (br s, 1H), 5.37 (d, *J* = 1.4 Hz, 1H), 4.90 (br s, 1H), 3.92 (dt, *J* = 8.8, 2.8 Hz, 1H), 2.43 (t, *J* = 7.8 Hz, 2H), 2.15 – 2.06 (m, 1H), 2.07 – 1.97 (m, 1H), 1.77 (td, *J* = 9.0, 4.6 Hz, 1H), 1.73 (s, 3H), 1.55 (p, *J* = 7.5 Hz, 2H), 1.51 – 1.41 (m, 1H), 1.34 – 1.24 (m, 5H), 0.92 – 0.85 (m, 3H), 0.83 (d, *J* = 1.1 Hz, 9H).

**<sup>13</sup>C{<sup>1</sup>H} NMR (126 MHz, CDCl<sub>3</sub>)** δ 156.2, 153.1, 142.9, 138.2, 125.9, 116.9, 110.2, 108.1, 46.5, 35.5, 34.1, 34.0, 31.6, 30.8, 30.8, 28.5, 25.1, 23.4, 22.7, 14.2.

**HRMS-ESI (m/z):** Calc. for C<sub>22</sub>H<sub>34</sub>O<sub>2</sub>: [M-H]<sup>+</sup> = 329.2481 ; found: 329.2478

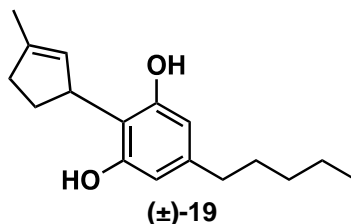

**Chemical Formula:** C<sub>17</sub>H<sub>24</sub>O<sub>2</sub>

**Exact Mass:** 260.18

Synthesis of (±)-19 from olivetol and (±)-17:

**Reaction Time:** 24 h

**TLC:** R<sub>f</sub> = 0.35 in 10:1 Hex/EtOAc, Stain= iodine

**Physical State:** yellow oil

**% Yield:** 21% (7.0 mg)

**<sup>1</sup>H NMR (500 MHz, CDCl<sub>3</sub>)** δ 6.22 (s, 2H), 5.61 – 5.54 (m, 1H), 5.50 (s, 2H), 4.42 (dtq, *J* = 8.7, 5.5, 2.7 Hz, 1H), 2.53 – 2.40 (m, 5H), 1.89 – 1.84 (m, 4H), 1.56 (p, *J* = 7.5 Hz, 2H), 1.34 – 1.28 (m, 4H), 0.89 (t, *J* = 6.8 Hz, 3H).

**<sup>13</sup>C{<sup>1</sup>H} NMR (126 MHz, CDCl<sub>3</sub>)** δ 155.1, 147.3, 143.1, 126.8, 113.9, 108.5, 40.9, 37.5, 35.6, 31.7, 31.4, 30.9, 22.7, 17.1, 14.2.

**HRMS-ESI (m/z):** Calc. for C<sub>17</sub>H<sub>24</sub>O<sub>2</sub>: [M-H]<sup>+</sup> = 259.1698 ; found: 259.0579

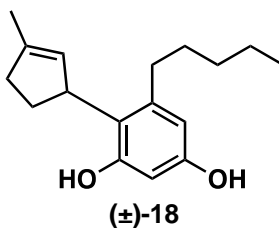

**Chemical Formula:** C<sub>17</sub>H<sub>24</sub>O<sub>2</sub>

**Exact Mass:** 260.18

Synthesis of (±)-18 from olivetol and (±)-17:

**Reaction Time:** 1 h

**TLC:** R<sub>f</sub> = 0.42 in 5:1 Hex/EtOAc, Stain= iodine

**Physical State:** yellow/orange oil

**% Yield:** 14% (4.8 mg)

**<sup>1</sup>H NMR (500 MHz, CDCl<sub>3</sub>)** δ 6.25 (s, 1H), 6.21 (s, 2H), 5.54 (s, 1H), 4.63 (s, 1H), 4.24 – 4.08 (m, 1H), 2.53 (s, 3H), 2.47 – 2.33 (m, 2H), 1.92 – 1.88 (m, 4H), 1.86 (s, 3H), 1.52 (t, *J* = 7.7 Hz, 2H), 1.37 – 1.30 (m, 4H), 1.26 (s, 1H), 0.92 – 0.85 (m, 3H).

**<sup>13</sup>C NMR (126 MHz, CDCl<sub>3</sub>)** δ 157.5, 154.7, 147.1, 142.9, 127.6, 120.0, 108.7, 102.1, 44.1, 37.5, 34.4, 32.0, 31.7, 31.6, 22.7, 17.1, 14.2.

**HRMS-ESI (m/z):** Calc. for C<sub>17</sub>H<sub>24</sub>O<sub>2</sub>: [M-H]<sup>+</sup> = 259.1698 ; found: 259.1139

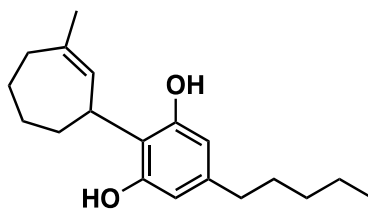

(±)-22

**Chemical Formula:** C<sub>19</sub>H<sub>28</sub>O<sub>2</sub>

**Exact Mass:** 288.21

Synthesis of (±)-22 from olivetol and (±)-20:

**Reaction Time:** 1 h

**TLC:** R<sub>f</sub> = 0.33 in 10:1 Hex/EtOAc, Stain = iodine

**Physical State:** yellow oil

**% Yield:** 40% (15.0 mg)

**<sup>1</sup>H NMR (500 MHz, CDCl<sub>3</sub>)** δ 6.23 (s, 2H), 5.59 – 5.51 (m, 1H), 5.17 (s, 2H), 4.06 – 3.87 (m, 1H), 2.55 – 2.36 (m, 2H), 2.36 – 2.28 (m, 1H), 2.21 (dd, *J* = 16.2, 9.5 Hz, 1H), 1.95 – 1.88 (m, 2H), 1.88 – 1.83 (m, 1H), 1.80 (d, *J* = 1.9 Hz, 3H), 1.78 – 1.73 (m, 1H), 1.68 – 1.62 (m, 1H), 1.59 – 1.51 (m, 3H), 1.35 – 1.27 (m, 4H), 0.91 – 0.78 (m, 3H).

**<sup>13</sup>C{<sup>1</sup>H} NMR (126 MHz, CDCl<sub>3</sub>)** δ 143.7, 142.8, 127.7, 117.0, 108.7, 36.1, 35.6, 34.0, 32.9, 31.7, 30.9, 29.2, 27.6, 26.6, 22.7, 14.2.

**HRMS-ESI (m/z):** Calc. for C<sub>19</sub>H<sub>28</sub>O<sub>2</sub>: [M-H]<sup>+</sup> = 287.2011 ; found: 287.2003

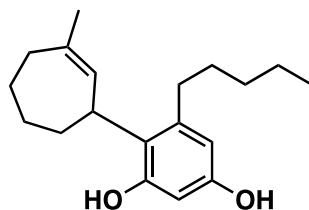

(±)-21

**Chemical Formula:** C<sub>19</sub>H<sub>28</sub>O<sub>2</sub>

**Exact Mass:** 288.21

Synthesis of (±)-21 from olivetol and (±)-20:

**Reaction Time:** 1 h

**TLC:** R<sub>f</sub> = 0.33 in 5:1 Hex/EtOAc, Stain = iodine

**Physical State:** yellow/orange oil

**% Yield:** 32% (12.0 mg)

**<sup>1</sup>H NMR (500 MHz, CDCl<sub>3</sub>)** δ 6.29 – 6.11 (m, 2H), 5.64 (s, 1H), 5.59 – 5.47 (m, 1H), 5.11 (s, 1H), 3.84 – 3.52 (m, 1H), 2.57 – 2.45 (m, 2H), 2.36 – 2.24 (m, 1H), 2.24 – 2.13 (m,

1H), 2.01 – 1.92 (m, 2H), 1.91 – 1.83 (m, 1H), 1.79 (t,  $J = 1.9$  Hz, 3H), 1.71 – 1.64 (m, 1H), 1.64 – 1.59 (m, 1H), 1.53 – 1.46 (m, 3H), 1.36 – 1.30 (m, 4H), 0.92 – 0.85 (m, 3H).  
 **$^{13}\text{C}$  NMR (126 MHz,  $\text{CDCl}_3$ )**  $\delta$  155.9, 154.4, 143.6, 141.8, 128.3, 123.9, 109.1, 102.2, 38.8, 34.4, 34.1, 33.5, 31.9, 31.2, 29.7, 27.5, 26.5, 22.6, 14.2.  
**HRMS-ESI (m/z):** Calc. for  $\text{C}_{19}\text{H}_{28}\text{O}_2$ :  $[\text{M}-\text{H}]^+ = 287.2011$  ; found: 287.2021

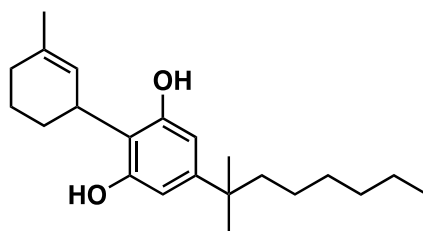

**(±)-3bc**  
**Chemical Formula:**  $\text{C}_{22}\text{H}_{34}\text{O}_2$   
**Exact Mass:** 330.26

Synthesis of **(±)-3bc** from 5-(1,1-Dimethyl-heptyl)resorcinol and **(±)-10c**:

**Reaction Time:** 24 h

**TLC:**  $R_f = 0.53$  in 10:1 Hex/EtOAc, Stain= iodine

**Physical State:** yellow/orange oil

**% Yield:** 98% (42.0 mg)

**$^1\text{H}$  NMR (500 MHz,  $\text{CDCl}_3$ )**  $\delta$  6.34 (s, 2H), 5.65 (s, 1H), 3.88 (ddq,  $J = 8.4, 5.4, 2.6$  Hz, 1H), 2.18 – 2.09 (m, 1H), 2.05 – 1.99 (m, 1H), 1.98 – 1.92 (m, 1H), 1.91 – 1.86 (m, 1H), 1.79 (s, 3H), 1.70 – 1.64 (m, 1H), 1.62 – 1.56 (m, 1H), 1.53 – 1.47 (m, 2H), 1.27 – 1.21 (m, 3H), 1.21 – 1.18 (m, 9H), 1.10 – 1.02 (m, 2H), 0.85 (t,  $J = 6.9$  Hz, 3H).

**$^{13}\text{C}\{^1\text{H}\}$  NMR (126 MHz,  $\text{CDCl}_3$ )**  $\delta$  150.3, 141.1, 123.9, 114.2, 44.6, 37.5, 32.4, 32.0, 30.2, 30.1, 28.9, 28.9, 28.4, 24.8, 24.3, 22.9, 22.5, 14.3.

**HRMS-ESI (m/z):** Calc. for  $\text{C}_{22}\text{H}_{34}\text{O}_2$ :  $[\text{M}-\text{H}]^+ = 329.2481$ ; found: 329.2494

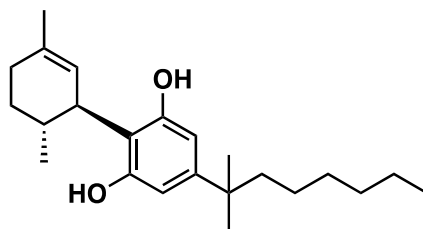

**(±)-3bd**  
**Chemical Formula:**  $\text{C}_{23}\text{H}_{36}\text{O}_2$   
**Exact Mass:** 344.27

Synthesis of **(±)-3bd** from 5-(1,1-Dimethyl-heptyl)resorcinol and **(±)-10d**:

**Reaction Time:** 24 h

**TLC:**  $R_f = 0.56$  in 10:1 Hex/EtOAc, Stain= iodine

**Physical State:** yellow oil

**% Yield:** 98% (43.8 mg)

**$^1\text{H}$  NMR (500 MHz,  $\text{CDCl}_3$ )**  $\delta$  6.45 – 6.16 (m, 2H), 6.00 (br s, 1H), 5.53 (d,  $J = 2.1$  Hz, 1H), 4.97 – 4.78 (m, 1H), 3.51 (ddq,  $J = 9.0, 4.5, 2.4$  Hz, 1H), 2.27 – 2.16 (m, 1H), 2.10 –

1.98 (m, 1H), 1.91 – 1.81 (m, 1H), 1.78 – 1.75 (m, 4H), 1.54 – 1.40 (m, 3H), 1.24 – 1.15 (m, 12H), 1.10 – 1.01 (m, 2H), 0.92 (d,  $J = 6.5$  Hz, 3H), 0.84 (t,  $J = 7.0$  Hz, 3H).

$^{13}\text{C}\{^1\text{H}\}$  NMR (126 MHz,  $\text{CDCl}_3$ )  $\delta$  150.4, 140.4, 124.1, 113.5, 44.6, 39.5, 37.5, 33.6, 31.9, 31.5, 30.6, 30.2, 28.9, 28.8, 24.8, 23.8, 22.8, 20.4, 14.2.

HRMS-ESI ( $m/z$ ): Calc. for  $\text{C}_{23}\text{H}_{36}\text{O}_2$ :  $[\text{M}-\text{H}]^+ = 343.2637$ ; found: 343.2633

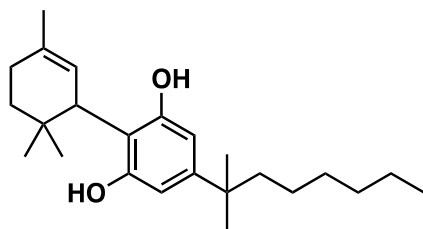

(±)-3be

Chemical Formula:  $\text{C}_{24}\text{H}_{38}\text{O}_2$

Exact Mass: 358.29

Synthesis of (±)-3be from 5-(1,1-Dimethyl-heptyl)resorcinol and (±)-10e:

Reaction Time: 24 h

TLC:  $R_f = 0.56$  in 10:1 Hex/EtOAc, Stain= iodine

Physical State: orange oil

% Yield: 72% (33.5 mg)

$^1\text{H}$  NMR (500 MHz,  $\text{CDCl}_3$ )  $\delta$  6.38 (d,  $J = 3.7$  Hz, 1H), 6.34 (d,  $J = 3.1$  Hz, 1H), 6.27 (d,  $J = 2.8$  Hz, 1H), 5.60 (s, 1H), 4.76 (s, 1H), 3.77 – 3.54 (m, 1H), 2.18 (d,  $J = 19.4$  Hz, 1H), 2.07 (d,  $J = 19.1$  Hz, 1H), 1.80 (s, 3H), 1.69 – 1.61 (m, 1H), 1.53 – 1.43 (m, 3H), 1.20 (d,  $J = 3.2$  Hz, 12H), 1.09 – 1.03 (m, 2H), 1.01 (d,  $J = 3.1$  Hz, 3H), 0.89 – 0.78 (m, 6H).

$^{13}\text{C}$  NMR (126 MHz,  $\text{CDCl}_3$ )  $\delta$  157.1, 154.2, 150.5, 139.4, 123.6, 111.1, 107.6, 105.3, 44.6, 41.9, 37.5, 35.7, 34.1, 31.9, 30.1, 29.2, 28.8, 28.1, 24.8, 24.1, 23.8, 22.8, 14.2.

HRMS-ESI ( $m/z$ ): Calc. for  $\text{C}_{24}\text{H}_{38}\text{O}_2$ :  $[\text{M}-\text{H}]^+ = 357.2794$ ; found: 357.2787

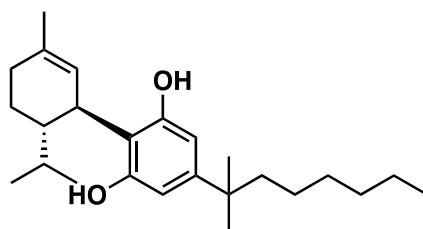

(±)-3b

Chemical Formula:  $\text{C}_{25}\text{H}_{40}\text{O}_2$

Exact Mass: 372.30

Synthesis of (±)-3b from 5-(1,1-Dimethyl-heptyl)resorcinol and (±)-10:

Reaction Time: 24 h

TLC:  $R_f = 0.58$  in 10:1 Hex/EtOAc, Stain= iodine

Physical State: yellow/brown oil

% Yield: 79% (38.4 mg)

$^1\text{H}$  NMR (500 MHz,  $\text{CDCl}_3$ )  $\delta$  6.41 – 6.21 (m, 2H), 6.05 (br s, 1H), 5.53 (s, 1H), 4.62 (br s, 1H), 3.80 (ddq,  $J = 8.9, 4.6, 2.4$  Hz, 1H), 2.21 – 2.05 (m, 2H), 1.82 – 1.78 (m, 1H), 1.77

(s, 3H), 1.66 – 1.57 (m, 2H), 1.53 – 1.46 (m, 2H), 1.45 – 1.33 (m, 1H), 1.24 – 1.21 (m, 3H), 1.20 (s, 6H), 1.19 – 1.16 (m, 3H), 1.08 – 1.02 (m, 2H), 0.87 – 0.83 (m, 9H).

**<sup>13</sup>C{<sup>1</sup>H} NMR (126 MHz, CDCl<sub>3</sub>)** δ 150.3, 140.2, 124.9, 113.7, 44.6, 43.8, 37.5, 35.6, 31.9, 30.8, 30.1, 28.9, 28.8, 27.9, 24.8, 23.8, 22.8, 22.3, 21.8, 16.6, 14.2.

**HRMS-ESI (m/z):** Calc. for C<sub>25</sub>H<sub>40</sub>O<sub>2</sub>: [M-H]<sup>+</sup> = 371.2950 ; found: 371.2756

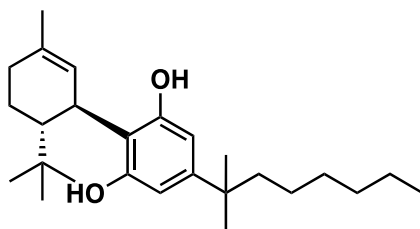

**(±)-3bf**

**Chemical Formula:** C<sub>26</sub>H<sub>42</sub>O<sub>2</sub>

**Exact Mass:** 386.32

Synthesis of **(±)-3bf** from 5-(1,1-Dimethyl-heptyl)resorcinol and **(±)-10f**:

**Reaction Time:** 24 h

**TLC:** R<sub>f</sub> = 0.58 in 10:1 Hex/EtOAc, Stain = iodine

**Physical State:** yellow/orange oil

**% Yield:** 56% (28.2 mg)

**<sup>1</sup>H NMR (500 MHz, CDCl<sub>3</sub>)** δ 6.55 – 6.08 (m, 2H), 5.90 – 5.79 (m, 1H), 5.42 – 5.31 (m, 1H), 5.00 (br s, 1H), 3.92 (dt, J = 9.8, 3.1 Hz, 1H), 2.20 – 2.11 (m, 1H), 2.10 – 1.97 (m, 2H), 1.81 – 1.75 (m, 1H), 1.74 (s, 3H), 1.52 – 1.43 (m, 3H), 1.23 – 1.18 (m, 8H), 1.18 – 1.11 (m, 4H), 1.03 – 0.96 (m, 2H), 0.84 (dd, J = 7.0, 1.4 Hz, 3H), 0.82 (d, J = 1.4 Hz, 9H).

**<sup>13</sup>C{<sup>1</sup>H} NMR (126 MHz, CDCl<sub>3</sub>)** δ 150.1, 138.2, 125.9, 116.5, 46.5, 44.7, 37.4, 34.2, 34.0, 31.9, 30.8, 30.1, 28.9, 28.8, 28.5, 25.1, 24.7, 23.4, 22.7, 14.2.

**HRMS-ESI (m/z):** Calc. for C<sub>26</sub>H<sub>42</sub>O<sub>2</sub>: [M-H]<sup>+</sup> = 385.3107 ; found: 385.3122

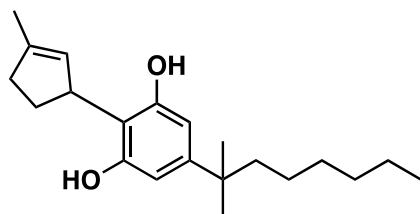

**(±)-19b**

**Chemical Formula:** C<sub>21</sub>H<sub>32</sub>O<sub>2</sub>

**Exact Mass:** 316.24

Synthesis of **(±)-19b** from 5-(1,1-Dimethyl-heptyl)resorcinol and **(±)-17**:

**Reaction Time:** 24 h

**TLC:** R<sub>f</sub> = 0.41 in 10:1 Hex/EtOAc, Stain = iodine

**Physical State:** yellow oil

**% Yield:** 55% (22.7 mg)

**<sup>1</sup>H NMR (500 MHz, CDCl<sub>3</sub>)** δ 6.34 (s, 2H), 5.58 (t, J = 2.0 Hz, 1H), 5.48 (s, 2H), 4.41 (dtq, J = 8.5, 5.4, 2.5 Hz, 1H), 2.55 – 2.39 (m, 3H), 1.89 – 1.83 (m, 4H), 1.55 – 1.44 (m, 2H),

1.27 – 1.22 (m, 3H), 1.20 (s, H), 1.07 (qd,  $J = 7.7, 7.2, 4.2$  Hz, 2H), 0.85 (t,  $J = 6.9$  Hz, 3H).

$^{13}\text{C}\{^1\text{H}\}$  NMR (126 MHz,  $\text{CDCl}_3$ )  $\delta$  154.8, 150.4, 147.2, 126.8, 113.6, 106.4, 44.6, 41.0, 37.5, 37.5, 31.9, 31.4, 30.2, 28.9, 24.8, 22.8, 17.1, 14.2.

HRMS-ESI (m/z): Calc. for  $\text{C}_{21}\text{H}_{32}\text{O}_2$ :  $[\text{M}-\text{H}]^+ = 315.2324$ ; found: 315.2324

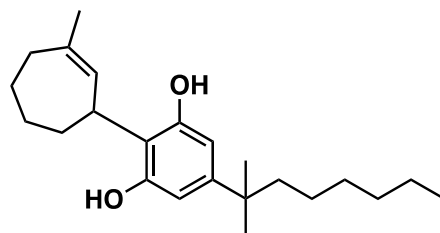

(±)-22b

Chemical Formula:  $\text{C}_{23}\text{H}_{36}\text{O}_2$

Exact Mass: 344.27

Synthesis of (±)-22b from 5-(1,1-Dimethyl-heptyl)resorcinol and (±)-20:

Reaction Time: 24 h

TLC:  $R_f = 0.41$  in 10:1 Hex/EtOAc, Stain= iodine

Physical State: yellow/brown oil

% Yield: 51% (23.0 mg)

$^1\text{H}$  NMR (500 MHz,  $\text{CDCl}_3$ )  $\delta$  6.36 (d,  $J = 2.0$  Hz, 2H), 5.57 (s, 1H), 5.20 (s, 2H), 4.04 – 3.96 (m, 1H), 2.34 – 2.28 (m, 1H), 2.21 (dd,  $J = 16.1, 9.4$  Hz, 1H), 1.93 (td,  $J = 11.0, 10.5, 2.2$  Hz, 2H), 1.88 – 1.82 (m, 1H), 1.83 – 1.75 (m, 4H), 1.69 – 1.61 (m, 1H), 1.56 (dq,  $J = 11.4, 5.0, 2.5$  Hz, 1H), 1.52 – 1.45 (m, 2H), 1.28 – 1.14 (m, 12H), 1.09 – 1.02 (m, 2H), 0.85 (td,  $J = 7.0, 2.0$  Hz, 3H).

$^{13}\text{C}$  NMR (126 MHz,  $\text{CDCl}_3$ )  $\delta$  153.8, 150.0, 143.6, 127.8, 116.6, 106.6, 44.6, 37.5, 36.1, 33.9, 32.9, 31.9, 30.2, 29.2, 28.9, 28.9, 27.6, 26.6, 24.8, 22.8, 14.2.

HRMS-ESI (m/z): Calc. for  $\text{C}_{23}\text{H}_{36}\text{O}_2$ :  $[\text{M}-\text{H}]^+ = 343.2637$ ; found: 343.2631

## Computational Studies:

Constrained conformational analyses of the transition states were performed with Grimme's Conformer-Rotamer Ensemble Sampling Tool<sup>S12</sup> (CREST). The resulting conformers were then optimized with ORCA<sup>S13-S16</sup> at the composite r<sup>2</sup>SCAN-3C<sup>S17</sup>/CPCM(CH<sub>2</sub>Cl<sub>2</sub>) level and verified as stationary points by inspection of harmonic vibrational frequencies. For **3ad** and **6ad**, the conformers were all confirmed as transition states connecting the desired reactants and products based on inspection of intrinsic reaction coordinate (IRC) scans. Products were similarly modeled by first performing unconstrained conformational analyses followed by r<sup>2</sup>SCAN-3C/CPCM(CH<sub>2</sub>Cl<sub>2</sub>) optimizations.

Benchmarking was performed on the global minimum structures for 3ae<sup>‡</sup> and 6ae<sup>‡</sup> against results at the DLPNO-CCSD(T)<sup>S18-S19</sup>/CBS(3,CC)<sup>S20</sup>/CPCM(CH<sub>2</sub>Cl<sub>2</sub>)/r<sup>2</sup>SCAN-3C/CPCM(CH<sub>2</sub>Cl<sub>2</sub>) level, with the results shown in **Table S1**. Inspection of **Table S1** indicates that the r<sup>2</sup>SCAN-3C composite method shows very nice agreement with the benchmark DLPNO-CCSD(T) results thus justifying our choice of computational model.

Listed in **Table S2** are computational summaries for transition state structures. The experimental value listed in **Table S2** assumes that the 1 h ratio of products is completely kinetically controlled. As can be seen from **Table S2**, this assumption does not appear to hold in all cases. In particular, for systems with the **10f** allylic alcohol, we see a large divergence between the computational and experimental ratios. We tentatively attribute this discrepancy to a breakdown of the kinetic assumption listed above. Conformational analysis for each of the systems are listed in **Tables S3-S62**. Representative structures are given in **Tables S63-S122**. **Figure S1** shows the Löwdin partial charges for the *ortho* and *para* carbons (relative to the alkyl group) for **7-7b**. The structures used here were the minima as determined by CREST, with optimizations at the same level of theory as listed above.

**Table S1.** Summary of benchmarking for **3ae<sup>‡</sup>** and **6ae<sup>‡</sup>**.

| Theory <sup>i</sup>    | BS         | E                | E                | G                | G                | $\Delta E^{\text{ii}}$ | $\Delta G^{\text{iii}}$ |
|------------------------|------------|------------------|------------------|------------------|------------------|------------------------|-------------------------|
|                        |            | 6ae <sup>‡</sup> | 3ae <sup>‡</sup> | 6ae <sup>‡</sup> | 3ae <sup>‡</sup> |                        |                         |
|                        |            | au               | au               | au               | au               |                        |                         |
| CCSD(T) <sup>iv</sup>  | CBS(3,CC)  | -733.558628      | -733.558314      | -733.275080      | -733.274932      | -0.20                  | -0.09                   |
| r <sup>2</sup> SCAN-3C |            | -734.345630      | -734.344590      | -734.062082      | -734.061209      | -0.65                  | -0.55                   |
| PBEH-3C                |            | -732.914515      | -732.913404      | -732.619010      | -732.617607      | -0.70                  | -0.88                   |
| M06                    | DEF2-SV(P) | -733.382846      | -733.383136      | -733.100011      | -733.099214      | 0.18                   | -0.50                   |
| M06                    | DEF2-TZVP  | -734.245852      | -734.244673      | -733.960794      | -733.959563      | -0.74                  | -0.77                   |
| M06-2X                 | DEF2-SV(P) | -733.568303      | -733.568621      | -733.280398      | -733.280928      | 0.20                   | 0.33                    |
| M06-2X                 | DEF2-TZVP  | -734.453233      | -734.452865      | -734.165339      | -734.164311      | -0.23                  | -0.65                   |
| B3LYP <sup>v</sup>     | DEF2-SV(P) | -733.527409      | -733.526976      | -733.243021      | -733.242338      | -0.27                  | -0.43                   |
| B3LYP <sup>v</sup>     | DEF2-TZVP  | -734.401946      | -734.400525      | -734.115812      | -734.114699      | -0.89                  | -0.70                   |
| PBE0 <sup>v</sup>      | DEF2-TZVP  | -733.953871      | -733.952908      | -733.667888      | -733.666829      | -0.60                  | -0.66                   |
| WB97X-D3BJ             | DEF2-SV(P) | -734.259902      | -734.260550      | -733.971218      | -733.972000      | 0.41                   | 0.49                    |
| WB97X-D3BJ             | DEF2-TZVP  | -735.118529      | -735.118001      | -734.829503      | -734.828868      | -0.33                  | -0.40                   |
| WB97X-V                | DEF2-SV(P) | -733.710349      | -733.710851      | -733.423273      | -733.423223      | 0.31                   | -0.03                   |
| WB97X-V                | DEF2-TZVP  | -734.569268      | -734.568997      | -734.281293      | -734.281979      | -0.17                  | 0.43                    |

<sup>i</sup> All models used the CPCM(CH<sub>2</sub>Cl<sub>2</sub>) implicit solvation model with the Gaussian charge scheme.

<sup>ii</sup> DE = E(Abnormal) – E(Normal)

<sup>iii</sup> DG = G(Abnormal) – G(Normal)

<sup>iv</sup> DLPNO-CCSD(T)/r<sup>2</sup>SCAN-3C

<sup>v</sup> D3BJ dispersion model was used.

**Table S2.** Summary of computational results.

| System | k <sup>3</sup> /k <sup>6</sup> |        |       |
|--------|--------------------------------|--------|-------|
|        | E                              | G      | Expt. |
| 3ac    | 0.33                           | 0.48   | 0.33  |
| 3ad    | 0.18                           | 0.24   | 0.40  |
| 3ae    | 0.41                           | 0.48   | 0.1   |
| 3a     | 1.00                           | 1.20   | 0.67  |
| 3af    | 0.20                           | 0.34   | 5.00  |
| 3c     | 1.02                           | 0.67   | 0.70  |
| 3d     | 1.74                           | 0.85   | 1.00  |
| 3e     | 0.55                           | 0.51   | 0.25  |
| 3      | 0.46                           | 0.49   | 1.10  |
| 3f     | 5.28                           | 2.34   | 27    |
| 3bc    | 2.32                           | 4.52   | > 100 |
| 3bd    | 3.48                           | 8.80   | > 100 |
| 3be    | 214.88                         | 206.01 | > 100 |
| 3b     | 40.60                          | 49.72  | > 100 |
| 3bf    | 43.00                          | 117.65 | 17    |



**Table S3.** Conformational analysis for **3ac<sup>‡</sup>**.

| Conformer # | E           | G           | DE       | DG       |
|-------------|-------------|-------------|----------|----------|
|             | au          | au          | kcal/mol | kcal/mol |
| 1           | -695.040902 | -694.784449 | 1.2      | 1.0      |
| 2           | -695.042754 | -694.785975 | 0.0      | 0.0      |
| 3           | -695.040806 | -694.782988 | 1.2      | 1.9      |
| 4           | -695.036347 | -694.779231 | 4.0      | 4.2      |
| 5           | -695.042334 | -694.784389 | 0.3      | 1.0      |
| 6           | -695.038989 | -694.780489 | 2.4      | 3.4      |
| 7           | -695.039122 | -694.780409 | 2.3      | 3.5      |
| Avg.        | -695.042280 | -694.785447 |          |          |

**Table S4.** Conformational analysis for **3ac**.

| Conformer # | E            | G            | DE       | DG       |
|-------------|--------------|--------------|----------|----------|
|             | au           | au           | kcal/mol | kcal/mol |
| 1           | -694.6426066 | -694.3949300 | 0.0      | 0.0      |
| 2           | -694.6413948 | -694.3942055 | 0.8      | 0.5      |
| 3           | -694.6405366 | -694.3929628 | 1.3      | 1.2      |
| Avg.        | -694.6421988 | -694.3945643 |          |          |

**Table S5.** Conformational analysis for **6ac<sup>‡</sup>**.

| Conformer # | E           | G           | DE       | DG       |
|-------------|-------------|-------------|----------|----------|
|             | au          | au          | kcal/mol | kcal/mol |
| 1           | -695.043855 | -694.786599 | 0.0      | 0.0      |
| 2           | -695.041395 | -694.784419 | 1.5      | 1.4      |
| 3           | -695.042175 | -694.784158 | 1.1      | 1.5      |
| 4           | -695.042770 | -694.784092 | 0.7      | 1.6      |
| 5           | -695.036967 | -694.779060 | 4.3      | 4.7      |
| 6           | -695.038860 | -694.779692 | 3.1      | 4.3      |
| Avg.        | -695.043319 | -694.786131 |          |          |

**Table S6.** Conformational analysis for **6ac**.

| Conformer # | E            | G            | DE       | DG       |
|-------------|--------------|--------------|----------|----------|
|             | au           | au           | kcal/mol | kcal/mol |
| 1           | -694.6416823 | -694.3926803 | 0.0      | 0.0      |
| 2           | -694.6397086 | -694.3902285 | 1.2      | 1.5      |
| Avg.        | -694.6414653 | -694.3925106 |          |          |

**Table S7.** Conformational analysis for **3ad<sup>‡</sup>**.

| Conformer # | E           | G           | DE       | DG       |
|-------------|-------------|-------------|----------|----------|
|             | au          | au          | kcal/mol | kcal/mol |
| 1           | -734.342834 | -734.059655 | 1.2      | 1.0      |
| 2           | -734.344604 | -734.061245 | 0.1      | 0.0      |
| 3           | -734.344690 | -734.060382 | 0.0      | 0.5      |
| 4           | -734.344181 | -734.059967 | 0.3      | 0.8      |
| 5           | -734.344229 | -734.059910 | 0.3      | 0.8      |
| 6           | -734.343398 | -734.058867 | 0.8      | 1.5      |
| 7           | -734.342415 | -734.058871 | 1.4      | 1.5      |
| 8           | -734.343353 | -734.059511 | 0.8      | 1.1      |
| 9           | -734.343231 | -734.058432 | 0.9      | 1.8      |
| Avg.        | -734.344175 | -734.060392 |          |          |

**Table S8.** Conformational analysis for **3ad**.

| Conformer # | E            | G            | DE       | DG       |
|-------------|--------------|--------------|----------|----------|
|             | au           | au           | kcal/mol | kcal/mol |
| 1           | -733.9464598 | -733.6725199 | 0.0      | 0.0      |
| 2           | -733.9447891 | -733.6709757 | 1.1      | 1.0      |
| 3           | -733.9465133 | -733.6719802 | 0.0      | 0.3      |
| Avg.        | -733.9463576 | -733.6721758 |          |          |

**Table S9.** Conformational analysis for **6ad<sup>‡</sup>**.

| Conformer # | E           | G           | DE       | DG       |
|-------------|-------------|-------------|----------|----------|
|             | au          | au          | kcal/mol | kcal/mol |
| 1           | -734.346141 | -734.061660 | 0.0      | 0.3      |
| 2           | -734.345644 | -734.062161 | 0.3      | 0.0      |
| 3           | -734.346134 | -734.061201 | 0.0      | 0.6      |
| 4           | -734.345518 | -734.061860 | 0.4      | 0.2      |
| 5           | -734.344669 | -734.059692 | 0.9      | 1.5      |
| 6           | -734.343801 | -734.058625 | 1.5      | 2.2      |
| Avg.        | -734.345809 | -734.061756 |          |          |

**Table S10.** Conformational analysis for **6ad**.

| Conformer # | E            | G            | DE       | DG       |
|-------------|--------------|--------------|----------|----------|
|             | au           | au           | kcal/mol | kcal/mol |
| 1           | -733.9451078 | -733.6696136 | 0.0      | 0.0      |
| 2           | -733.9451554 | -733.6695269 | 0.0      | 0.1      |
| 3           | -733.9424533 | -733.6665897 | 1.7      | 1.9      |
| 4           | -733.9424183 | -733.6665334 | 1.7      | 1.9      |
| Avg.        | -733.9449858 | -733.6694531 |          |          |

**Table S11.** Conformational analysis for **3ae<sup>‡</sup>**.

| Conformer # | E           | G           | DE       | DG       |
|-------------|-------------|-------------|----------|----------|
|             | au          | au          | kcal/mol | kcal/mol |
| 1           | -773.644200 | -773.333030 | 0.2      | 0.1      |
| 2           | -773.642660 | -773.331497 | 1.2      | 1.1      |
| 3           | -773.644436 | -773.333124 | 0.1      | 0.1      |
| 4           | -773.642231 | -773.331986 | 1.5      | 0.8      |
| 5           | -773.644576 | -773.333265 | 0.0      | 0.0      |
| Avg.        | -773.644278 | -773.332969 |          |          |

**Table S12.** Conformational analysis for **3ae**.

| Conformer # | E           | G           | DE       | DG       |
|-------------|-------------|-------------|----------|----------|
|             | au          | au          | kcal/mol | kcal/mol |
| 1           | -773.246127 | -772.945009 | 0.1      | 0.0      |
| 2           | -773.246222 | -772.944557 | 0.0      | 0.3      |
| Avg.        | -773.246177 | -772.944836 |          |          |

**Table S13.** Conformational analysis for **6ae<sup>‡</sup>**.

| Conformer # | E           | G           | DE       | DG       |
|-------------|-------------|-------------|----------|----------|
|             | au          | au          | kcal/mol | kcal/mol |
| 1           | -773.645613 | -773.334124 | 0.0      | 0.0      |
| 2           | -773.643223 | -773.331717 | 1.5      | 1.5      |
| 3           | -773.643243 | -773.332048 | 1.5      | 1.3      |
| 4           | -773.643595 | -773.331505 | 1.3      | 1.6      |
| Avg.        | -773.645128 | -773.333660 |          |          |

**Table S14.** Conformational analysis for **6ae**.

| Conformer # | E           | G           | DE       | DG       |
|-------------|-------------|-------------|----------|----------|
|             | au          | au          | kcal/mol | kcal/mol |
| 1           | -773.238073 | -772.935667 | 0.1      | 0.2      |
| 2           | -773.237674 | -772.935309 | 0.4      | 0.4      |
| 3           | -773.238306 | -772.935938 | 0.0      | 0.0      |
| 4           | -773.236347 | -772.934262 | 1.2      | 1.1      |
| 5           | -773.237508 | -772.935459 | 0.5      | 0.3      |
| 6           | -773.236056 | -772.934252 | 1.4      | 1.1      |
| 7           | -773.237958 | -772.935609 | 0.2      | 0.2      |
| 8           | -773.237144 | -772.935239 | 0.7      | 0.4      |
| Avg.        | -773.237827 | -772.935494 |          |          |

**Table S15.** Conformational analysis for **3a<sup>‡</sup>**.

| Conformer # | E           | G           | DE       | DG       |
|-------------|-------------|-------------|----------|----------|
|             | au          | au          | kcal/mol | kcal/mol |
| 1           | -812.947249 | -812.609165 | 0.1      | 0.0      |
| 2           | -812.947349 | -812.609087 | 0.0      | 0.0      |
| 3           | -812.946129 | -812.609048 | 0.8      | 0.1      |
| 4           | -812.945090 | -812.607915 | 1.4      | 0.8      |
| 5           | -812.945093 | -812.607908 | 1.4      | 0.8      |
| 6           | -812.945158 | -812.607240 | 1.4      | 1.2      |
| Avg.        | -812.946920 | -812.608850 |          |          |

**Table S16.** Conformational analysis for **3a**.

| Conformer # | E            | G            | DE       | DG       |
|-------------|--------------|--------------|----------|----------|
|             | au           | au           | kcal/mol | kcal/mol |
| 1           | -812.5469972 | -812.2195526 | 0.0      | 0.0      |
| 2           | -812.5449901 | -812.2175753 | 1.3      | 1.2      |
| 3           | -812.5442272 | -812.2159939 | 1.7      | 2.2      |
| Avg.        | -812.5466676 | -812.2192689 |          |          |

**Table S17.** Conformational analysis for **6a<sup>‡</sup>**.

| Conformer # | E           | G           | DE       | DG       |
|-------------|-------------|-------------|----------|----------|
|             | au          | au          | kcal/mol | kcal/mol |
| 1           | -812.947767 | -812.609006 | 0.0      | 0.2      |
| 2           | -812.946622 | -812.609248 | 0.7      | 0.0      |
| 3           | -812.945723 | -812.607357 | 1.3      | 1.2      |
| 4           | -812.945657 | -812.607255 | 1.3      | 1.3      |
| 5           | -812.946514 | -812.608662 | 0.8      | 0.4      |
| 6           | -812.945793 | -812.607017 | 1.2      | 1.4      |
| 7           | -812.946369 | -812.608053 | 0.9      | 0.7      |
| 8           | -812.945474 | -812.606604 | 1.4      | 1.7      |
| Avg.        | -812.946914 | -812.608680 |          |          |

**Table S18.** Conformational analysis for **6a**.

| Conformer # | E           | G           | DE       | DG       |
|-------------|-------------|-------------|----------|----------|
|             | au          | au          | kcal/mol | kcal/mol |
| 1           | -812.540312 | -812.211749 | 0.2      | 0.0      |
| 2           | -812.539903 | -812.211568 | 0.4      | 0.1      |
| 3           | -812.540602 | -812.211680 | 0.0      | 0.0      |
| 4           | -812.538010 | -812.209144 | 1.6      | 1.6      |
| 5           | -812.537488 | -812.208888 | 2.0      | 1.8      |
| Avg.        | -812.540245 | -812.211569 |          |          |

**Table S19.** Conformational analysis for **3af<sup>‡</sup>**.

| Conformer # | E           | G           | DE       | DG       |
|-------------|-------------|-------------|----------|----------|
|             | au          | au          | kcal/mol | kcal/mol |
| 1           | -852.246587 | -851.880393 | 0.3      | 1.6      |
| 2           | -852.246243 | -851.880556 | 0.5      | 1.5      |
| 3           | -852.246994 | -851.882921 | 0.1      | 0.0      |
| 4           | -852.247086 | -851.882647 | 0.0      | 0.2      |
| 5           | -852.245031 | -851.879790 | 1.3      | 2.0      |
| Avg.        | -852.246770 | -851.882567 |          |          |

**Table S20.** Conformational analysis for **3af**.

| Conformer # | E           | G           | DE       | DG       |
|-------------|-------------|-------------|----------|----------|
|             | au          | au          | kcal/mol | kcal/mol |
| 1           | -851.842902 | -851.488988 | 0.0      | 0.0      |
| 2           | -851.841912 | -851.486364 | 0.6      | 1.6      |
| 3           | -851.840876 | -851.485889 | 1.3      | 1.9      |
| 4           | -851.841916 | -851.486371 | 0.6      | 1.6      |
| Avg.        | -851.842390 | -851.488607 |          |          |

**Table S21.** Conformational analysis for **6af<sup>‡</sup>**.

| Conformer # | E           | G           | DE       | DG       |
|-------------|-------------|-------------|----------|----------|
|             | au          | au          | kcal/mol | kcal/mol |
| 1           | -852.248105 | -851.882371 | 0.4      | 1.1      |
| 2           | -852.248760 | -851.884061 | 0.0      | 0.0      |
| 3           | -852.247436 | -851.880340 | 0.8      | 2.3      |
| 4           | -852.248226 | -851.883357 | 0.3      | 0.4      |
| 5           | -852.246646 | -851.881230 | 1.3      | 1.8      |
| Avg.        | -852.248272 | -851.883576 |          |          |

**Table S22.** Conformational analysis for **6af**.

| Conformer # | E           | G           | DE       | DG       |
|-------------|-------------|-------------|----------|----------|
|             | au          | au          | kcal/mol | kcal/mol |
| 1           | -851.837324 | -851.482272 | 0.3      | 0.0      |
| 2           | -851.837498 | -851.481832 | 0.2      | 0.3      |
| 3           | -851.837788 | -851.482262 | 0.0      | 0.0      |
| Avg.        | -851.837576 | -851.482163 |          |          |

**Table S23.** Conformational analysis for **3c<sup>+</sup>**.

| Conformer # | E           | G           | DE       | DG       |
|-------------|-------------|-------------|----------|----------|
|             | au          | au          | kcal/mol | kcal/mol |
| 1           | -852.246553 | -851.881831 | 0.0      | 0.3      |
| 2           | -852.244519 | -851.879668 | 1.3      | 1.6      |
| 3           | -852.246623 | -851.882080 | 0.0      | 0.1      |
| 4           | -852.246406 | -851.882294 | 0.1      | 0.0      |
| 5           | -852.245382 | -851.880987 | 0.8      | 0.8      |
| 6           | -852.245263 | -851.880988 | 0.9      | 0.8      |
| 7           | -852.245700 | -851.880005 | 0.6      | 1.4      |
| 8           | -852.245362 | -851.882064 | 0.8      | 0.1      |
| 9           | -852.246031 | -851.880773 | 0.4      | 1.0      |
| 10          | -852.245527 | -851.879008 | 0.7      | 2.1      |
| 11          | -852.245099 | -851.880388 | 1.0      | 1.2      |
| 12          | -852.245554 | -851.880477 | 0.7      | 1.1      |
| 13          | -852.245745 | -851.880350 | 0.6      | 1.2      |
| 14          | -852.245758 | -851.880368 | 0.5      | 1.2      |
| 15          | -852.245349 | -851.881209 | 0.8      | 0.7      |
| 16          | -852.245426 | -851.880931 | 0.8      | 0.9      |
| 17          | -852.245093 | -851.880375 | 1.0      | 1.2      |
| 18          | -852.244893 | -851.879873 | 1.1      | 1.5      |
| 19          | -852.244912 | -851.880168 | 1.1      | 1.3      |
| 20          | -852.244488 | -851.879861 | 1.3      | 1.5      |
| 21          | -852.244462 | -851.880376 | 1.4      | 1.2      |
| 22          | -852.245473 | -851.881196 | 0.7      | 0.7      |
| 23          | -852.244482 | -851.880538 | 1.3      | 1.1      |
| 24          | -852.244292 | -851.879786 | 1.5      | 1.6      |
| 25          | -852.245864 | -851.879805 | 0.5      | 1.6      |
| 26          | -852.244470 | -851.880393 | 1.4      | 1.2      |
| 27          | -852.244397 | -851.880194 | 1.4      | 1.3      |
| 28          | -852.246258 | -851.880854 | 0.2      | 0.9      |
| 29          | -852.244230 | -851.879348 | 1.5      | 1.8      |
| 30          | -852.244817 | -851.879354 | 1.1      | 1.8      |
| 31          | -852.245249 | -851.880035 | 0.9      | 1.4      |
| 32          | -852.245258 | -851.879291 | 0.9      | 1.9      |
| 33          | -852.245259 | -851.879354 | 0.9      | 1.8      |
| 34          | -852.246384 | -851.879393 | 0.1      | 1.8      |
| 35          | -852.244326 | -851.878660 | 1.4      | 2.3      |
| 36          | -852.244211 | -851.879630 | 1.5      | 1.7      |
| 37          | -852.246475 | -851.881142 | 0.1      | 0.7      |
| 38          | -852.244684 | -851.878801 | 1.2      | 2.2      |
| 39          | -852.246489 | -851.880963 | 0.1      | 0.8      |
| 40          | -852.244979 | -851.879635 | 1.0      | 1.7      |

|      |             |             |     |     |
|------|-------------|-------------|-----|-----|
| 41   | -852.244808 | -851.879746 | 1.1 | 1.6 |
| 42   | -852.244958 | -851.880147 | 1.0 | 1.3 |
| 43   | -852.245789 | -851.879872 | 0.5 | 1.5 |
| 44   | -852.244961 | -851.879753 | 1.0 | 1.6 |
| 45   | -852.244536 | -851.878351 | 1.3 | 2.5 |
| 46   | -852.244963 | -851.879797 | 1.0 | 1.6 |
| 47   | -852.245716 | -851.880006 | 0.6 | 1.4 |
| 48   | -852.244882 | -851.879733 | 1.1 | 1.6 |
| 49   | -852.244992 | -851.879985 | 1.0 | 1.4 |
| 50   | -852.245180 | -851.878112 | 0.9 | 2.6 |
| 51   | -852.244791 | -851.879475 | 1.1 | 1.8 |
| 52   | -852.244984 | -851.879954 | 1.0 | 1.5 |
| 53   | -852.245165 | -851.879530 | 0.9 | 1.7 |
| 54   | -852.244996 | -851.880058 | 1.0 | 1.4 |
| 55   | -852.244905 | -851.878656 | 1.1 | 2.3 |
| 56   | -852.245187 | -851.879652 | 0.9 | 1.7 |
| 57   | -852.245800 | -851.879664 | 0.5 | 1.7 |
| 58   | -852.244391 | -851.878815 | 1.4 | 2.2 |
| 59   | -852.245834 | -851.879921 | 0.5 | 2.5 |
| 60   | -852.245122 | -851.878811 | 0.9 | 2.2 |
| 61   | -852.244584 | -851.878653 | 1.3 | 2.3 |
| 62   | -852.245047 | -851.878737 | 1.0 | 2.2 |
| 63   | -852.245747 | -851.879920 | 0.5 | 1.5 |
| 64   | -852.245034 | -851.879025 | 1.0 | 2.1 |
| 65   | -852.245002 | -851.880084 | 1.0 | 1.4 |
| 66   | -852.245087 | -851.880282 | 1.0 | 1.3 |
| Avg. | -852.245665 | -851.880949 |     |     |

**Table S24.** Conformational analysis for **3c**.

| Conformer # | E           | G           | DE       | DG       |
|-------------|-------------|-------------|----------|----------|
|             | au          | au          | kcal/mol | kcal/mol |
| 1           | -851.845097 | -851.489506 | 0.1      | 0.3      |
| 2           | -851.845154 | -851.489440 | 0.1      | 0.4      |
| 3           | -851.845119 | -851.489624 | 0.1      | 0.3      |
| 4           | -851.845254 | -851.490055 | 0.0      | 0.0      |
| 5           | -851.844777 | -851.488497 | 0.3      | 1.0      |
| 6           | -851.844847 | -851.488577 | 0.3      | 0.9      |
| 7           | -851.844889 | -851.488745 | 0.2      | 0.8      |
| 8           | -851.844249 | -851.488427 | 0.6      | 1.0      |
| 9           | -851.844175 | -851.488145 | 0.7      | 1.2      |
| 10          | -851.844105 | -851.488351 | 0.7      | 1.1      |
| 11          | -851.844069 | -851.488189 | 0.7      | 1.2      |
| 12          | -851.844035 | -851.488217 | 0.8      | 1.2      |
| 13          | -851.844210 | -851.488658 | 0.7      | 0.9      |
| 14          | -851.844190 | -851.488687 | 0.7      | 0.9      |
| 15          | -851.844285 | -851.488689 | 0.6      | 0.9      |
| 16          | -851.844201 | -851.488793 | 0.7      | 0.8      |
| 17          | -851.843119 | -851.487043 | 1.3      | 1.9      |
| 18          | -851.843067 | -851.486749 | 1.4      | 2.1      |
| 19          | -851.842932 | -851.486887 | 1.5      | 2.0      |
| 20          | -851.842359 | -851.485686 | 1.8      | 2.7      |
| 21          | -851.843839 | -851.488176 | 0.9      | 1.2      |
| 22          | -851.844148 | -851.487252 | 0.7      | 1.8      |
| 23          | -851.842351 | -851.485539 | 1.8      | 2.8      |
| 24          | -851.844115 | -851.487243 | 0.7      | 1.8      |
| 25          | -851.844130 | -851.487202 | 0.7      | 1.8      |
| 26          | -851.843818 | -851.488057 | 0.9      | 1.3      |
| 27          | -851.843814 | -851.487706 | 0.9      | 1.5      |
| 28          | -851.843894 | -851.487934 | 0.9      | 1.3      |
| 29          | -851.843982 | -851.487831 | 0.8      | 1.4      |
| 30          | -851.842326 | -851.486004 | 1.8      | 2.5      |
| 31          | -851.842317 | -851.485573 | 1.8      | 2.8      |
| 32          | -851.844061 | -851.487850 | 0.7      | 1.4      |
| 33          | -851.843845 | -851.488304 | 0.9      | 1.1      |
| 34          | -851.843859 | -851.488317 | 0.9      | 1.1      |
| 35          | -851.843646 | -851.486887 | 1.0      | 2.0      |
| 36          | -851.843581 | -851.486730 | 1.0      | 2.1      |
| 37          | -851.843539 | -851.486914 | 1.1      | 2.0      |
| 38          | -851.843564 | -851.486996 | 1.1      | 1.9      |
| 39          | -851.842953 | -851.486722 | 1.4      | 2.1      |
| 40          | -851.843250 | -851.486763 | 1.3      | 2.1      |
| 41          | -851.842950 | -851.486663 | 1.4      | 2.1      |
| 42          | -851.842788 | -851.486555 | 1.5      | 2.2      |



|      |             |             |     |     |
|------|-------------|-------------|-----|-----|
| 43   | -851.842874 | -851.486613 | 1.5 | 2.2 |
| 44   | -851.842872 | -851.486699 | 1.5 | 2.1 |
| 45   | -851.842859 | -851.486703 | 1.5 | 2.1 |
| 46   | -851.843284 | -851.488657 | 1.2 | 0.9 |
| 47   | -851.842930 | -851.487201 | 1.5 | 1.8 |
| 48   | -851.842915 | -851.486948 | 1.5 | 1.9 |
| 49   | -851.842916 | -851.487287 | 1.5 | 1.7 |
| 50   | -851.842954 | -851.487126 | 1.4 | 1.8 |
| 51   | -851.842920 | -851.487007 | 1.5 | 1.9 |
| 52   | -851.842146 | -851.485448 | 2.0 | 2.9 |
| 53   | -851.842886 | -851.487000 | 1.5 | 1.9 |
| 54   | -851.842926 | -851.485680 | 1.5 | 2.7 |
| 55   | -851.842825 | -851.485813 | 1.5 | 2.7 |
| 56   | -851.842956 | -851.485912 | 1.4 | 2.6 |
| 57   | -851.842820 | -851.485775 | 1.5 | 2.7 |
| 58   | -851.842709 | -851.486161 | 1.6 | 2.4 |
| 59   | -851.842696 | -851.486290 | 1.6 | 2.4 |
| 60   | -851.842550 | -851.486959 | 1.7 | 1.9 |
| 61   | -851.842732 | -851.486080 | 1.6 | 2.5 |
| 62   | -851.842709 | -851.486277 | 1.6 | 2.4 |
| 63   | -851.843049 | -851.488137 | 1.4 | 1.2 |
| 64   | -851.842273 | -851.487627 | 1.9 | 1.5 |
| 65   | -851.843179 | -851.488246 | 1.3 | 1.1 |
| 66   | -851.844778 | -851.488340 | 0.3 | 1.1 |
| Avg. | -851.844229 | -851.488642 |     |     |

**Table S25.** Conformational analysis for **6c<sup>‡</sup>**.

| Conformer # | E           | G           | DE       | DG       |
|-------------|-------------|-------------|----------|----------|
|             | au          | au          | kcal/mol | kcal/mol |
| 1           | -852.246482 | -851.882016 | 0.1      | 0.2      |
| 2           | -852.246567 | -851.882298 | 0.0      | 0.0      |
| 3           | -852.246485 | -851.882363 | 0.1      | 0.0      |
| 4           | -852.244265 | -851.880548 | 1.4      | 1.1      |
| 5           | -852.245952 | -851.881281 | 0.4      | 0.7      |
| 6           | -852.246142 | -851.881141 | 0.3      | 0.8      |
| 7           | -852.244783 | -851.878442 | 1.1      | 2.5      |
| 8           | -852.245668 | -851.880714 | 0.6      | 1.0      |
| 9           | -852.245691 | -851.881070 | 0.5      | 0.8      |
| 10          | -852.245618 | -851.881498 | 0.6      | 0.5      |
| 11          | -852.245456 | -851.880619 | 0.7      | 1.1      |
| 12          | -852.245412 | -851.880663 | 0.7      | 1.1      |
| 13          | -852.245726 | -851.881366 | 0.5      | 0.6      |
| 14          | -852.245536 | -851.881218 | 0.6      | 0.7      |
| 15          | -852.245662 | -851.881289 | 0.6      | 0.7      |
| 16          | -852.246259 | -851.881766 | 0.2      | 0.4      |

|      |             |             |     |     |
|------|-------------|-------------|-----|-----|
| 17   | -852.244256 | -851.880351 | 1.5 | 1.3 |
| 18   | -852.244556 | -851.878207 | 1.3 | 2.6 |
| 19   | -852.244499 | -851.879161 | 1.3 | 2.0 |
| 20   | -852.244789 | -851.879063 | 1.1 | 2.1 |
| 21   | -852.245294 | -851.879887 | 0.8 | 1.6 |
| 22   | -852.245602 | -851.880036 | 0.6 | 1.5 |
| 23   | -852.244700 | -851.879512 | 1.2 | 1.8 |
| 24   | -852.245440 | -851.880401 | 0.7 | 1.2 |
| 25   | -852.245546 | -851.880500 | 0.6 | 1.2 |
| 26   | -852.244741 | -851.880493 | 1.1 | 1.2 |
| 27   | -852.245606 | -851.880091 | 0.6 | 1.4 |
| 28   | -852.244806 | -851.880288 | 1.1 | 1.3 |
| 29   | -852.244345 | -851.878398 | 1.4 | 2.5 |
| 30   | -852.245230 | -851.880374 | 0.8 | 1.2 |
| 31   | -852.244641 | -851.879286 | 1.2 | 1.9 |
| 32   | -852.244744 | -851.878723 | 1.1 | 2.3 |
| 33   | -852.244794 | -851.879023 | 1.1 | 2.1 |
| 34   | -852.245300 | -851.880501 | 0.8 | 1.2 |
| 35   | -852.244479 | -851.880423 | 1.3 | 1.2 |
| 36   | -852.244209 | -851.879101 | 1.5 | 2.0 |
| 37   | -852.246429 | -851.881781 | 0.1 | 0.4 |
| 38   | -852.245642 | -851.879878 | 0.6 | 1.6 |
| 39   | -852.245739 | -851.880564 | 0.5 | 1.1 |
| 40   | -852.244868 | -851.880254 | 1.1 | 1.3 |
| 41   | -852.245068 | -851.879664 | 0.9 | 1.7 |
| 42   | -852.245266 | -851.879215 | 0.8 | 2.0 |
| 43   | -852.244926 | -851.879514 | 1.0 | 1.8 |
| 44   | -852.244757 | -851.878683 | 1.1 | 2.3 |
| 45   | -852.244843 | -851.879319 | 1.1 | 1.9 |
| 46   | -852.244770 | -851.878794 | 1.1 | 2.2 |
| 47   | -852.244558 | -851.878453 | 1.3 | 2.5 |
| 48   | -852.244804 | -851.879254 | 1.1 | 2.0 |
| 49   | -852.244875 | -851.878624 | 1.1 | 2.3 |
| 50   | -852.244608 | -851.877817 | 1.2 | 2.9 |
| 51   | -852.244603 | -851.878579 | 1.2 | 2.4 |
| 52   | -852.244747 | -851.879581 | 1.1 | 1.7 |
| 53   | -852.244280 | -851.878488 | 1.4 | 2.4 |
| Avg. | -852.245639 | -851.881249 |     |     |

**Table S26.** Conformational analysis for **6c**.

| Conformer # | E           | G           | DE       | DG       |
|-------------|-------------|-------------|----------|----------|
|             | au          | au          | kcal/mol | kcal/mol |
| 1           | -851.843567 | -851.487439 | 0.3      | 0.4      |
| 2           | -851.844007 | -851.488112 | 0.0      | 0.0      |
| 3           | -851.843144 | -851.486635 | 0.6      | 0.9      |
| 4           | -851.843233 | -851.486952 | 0.5      | 0.7      |
| 5           | -851.843008 | -851.486233 | 0.6      | 1.2      |
| 6           | -851.843071 | -851.487124 | 0.6      | 0.6      |
| 7           | -851.843529 | -851.487470 | 0.3      | 0.4      |
| 8           | -851.842771 | -851.486268 | 0.8      | 1.2      |
| 9           | -851.843077 | -851.486971 | 0.6      | 0.7      |
| 10          | -851.843602 | -851.487399 | 0.3      | 0.4      |
| 11          | -851.842643 | -851.485673 | 0.9      | 1.5      |
| 12          | -851.842493 | -851.486060 | 1.0      | 1.3      |
| 13          | -851.843225 | -851.486921 | 0.5      | 0.7      |
| 14          | -851.842456 | -851.485430 | 1.0      | 1.7      |
| 15          | -851.844037 | -851.487978 | 0.0      | 0.1      |
| 16          | -851.842798 | -851.485848 | 0.8      | 1.4      |
| 17          | -851.841781 | -851.484875 | 1.4      | 2.0      |
| 18          | -851.842479 | -851.486377 | 1.0      | 1.1      |
| 19          | -851.843380 | -851.486685 | 0.4      | 0.9      |
| 20          | -851.843336 | -851.487610 | 0.4      | 0.3      |
| 21          | -851.842046 | -851.485180 | 1.2      | 1.8      |
| 22          | -851.841313 | -851.484123 | 1.7      | 2.5      |
| 23          | -851.842449 | -851.486249 | 1.0      | 1.2      |
| 24          | -851.841941 | -851.485823 | 1.3      | 1.4      |
| 25          | -851.842038 | -851.485553 | 1.3      | 1.6      |
| 26          | -851.842106 | -851.485607 | 1.2      | 1.6      |
| 27          | -851.842071 | -851.485673 | 1.2      | 1.5      |
| 28          | -851.841365 | -851.485424 | 1.7      | 1.7      |
| 29          | -851.842787 | -851.486360 | 0.8      | 1.1      |
| 30          | -851.842896 | -851.485962 | 0.7      | 1.3      |
| 31          | -851.842209 | -851.485000 | 1.1      | 2.0      |
| 32          | -851.841836 | -851.484924 | 1.4      | 2.0      |
| 33          | -851.841737 | -851.485526 | 1.4      | 1.6      |
| 34          | -851.841314 | -851.484056 | 1.7      | 2.5      |
| 35          | -851.840918 | -851.484360 | 2.0      | 2.4      |
| 36          | -851.841688 | -851.485951 | 1.5      | 1.4      |
| 37          | -851.841232 | -851.484617 | 1.8      | 2.2      |
| 38          | -851.840902 | -851.483992 | 2.0      | 2.6      |
| Avg.        | -851.843128 | -851.487077 |          |          |

**Table S27.** Conformational analysis for 3d<sup>‡</sup>.

| Conformer # | E           | G           | DE       | DG       |
|-------------|-------------|-------------|----------|----------|
|             | au          | au          | kcal/mol | kcal/mol |
| 1           | -891.549995 | -891.156939 | 0.0      | 0.3      |
| 2           | -891.548978 | -891.156205 | 0.6      | 0.8      |
| 3           | -891.548765 | -891.156915 | 0.8      | 0.3      |
| 4           | -891.548477 | -891.155338 | 1.0      | 1.3      |
| 5           | -891.548532 | -891.156960 | 0.9      | 0.3      |
| 6           | -891.548338 | -891.155351 | 1.0      | 1.3      |
| 7           | -891.548641 | -891.155451 | 0.9      | 1.2      |
| 8           | -891.548017 | -891.155025 | 1.2      | 1.5      |
| 9           | -891.545226 | -891.154695 | 3.0      | 1.7      |
| 10          | -891.547932 | -891.154692 | 1.3      | 1.7      |
| 11          | -891.547368 | -891.155177 | 1.7      | 1.4      |
| 12          | -891.548180 | -891.155109 | 1.1      | 1.5      |
| 13          | -891.547369 | -891.155352 | 1.7      | 1.3      |
| 14          | -891.547386 | -891.155874 | 1.6      | 1.0      |
| 15          | -891.548300 | -891.157441 | 1.1      | 0.0      |
| 16          | -891.547209 | -891.156246 | 1.8      | 0.7      |
| 17          | -891.547158 | -891.155993 | 1.8      | 0.9      |
| 18          | -891.547582 | -891.155613 | 1.5      | 1.1      |
| 19          | -891.547631 | -891.155664 | 1.5      | 1.1      |
| 20          | -891.547679 | -891.155549 | 1.5      | 1.2      |
| 21          | -891.548090 | -891.154944 | 1.2      | 1.6      |
| 22          | -891.547228 | -891.156496 | 1.7      | 0.6      |
| 23          | -891.548021 | -891.156045 | 1.2      | 0.9      |
| 24          | -891.547797 | -891.155904 | 1.4      | 1.0      |
| 25          | -891.547929 | -891.155908 | 1.3      | 1.0      |
| 26          | -891.547477 | -891.156117 | 1.6      | 0.8      |
| 27          | -891.547508 | -891.156327 | 1.6      | 0.7      |
| 28          | -891.548094 | -891.155224 | 1.2      | 1.4      |
| 29          | -891.547942 | -891.154283 | 1.3      | 2.0      |
| 30          | -891.547970 | -891.155040 | 1.3      | 1.5      |
| 31          | -891.546862 | -891.154498 | 2.0      | 1.8      |
| 32          | -891.547676 | -891.156198 | 1.5      | 0.8      |
| 33          | -891.546909 | -891.154328 | 1.9      | 2.0      |
| 34          | -891.547713 | -891.155077 | 1.4      | 1.5      |
| 35          | -891.547295 | -891.156251 | 1.7      | 0.7      |
| 36          | -891.547532 | -891.154144 | 1.6      | 2.1      |
| 37          | -891.546876 | -891.155060 | 2.0      | 1.5      |
| 38          | -891.547975 | -891.155316 | 1.3      | 1.3      |
| 39          | -891.547655 | -891.156395 | 1.5      | 0.7      |
| 40          | -891.547493 | -891.155574 | 1.6      | 1.2      |
| 41          | -891.547552 | -891.156437 | 1.5      | 0.6      |
| 42          | -891.547566 | -891.154699 | 1.5      | 1.7      |

|      |             |             |     |     |
|------|-------------|-------------|-----|-----|
| 43   | -891.547400 | -891.154911 | 1.6 | 1.6 |
| 44   | -891.547989 | -891.153756 | 1.3 | 2.3 |
| 45   | -891.547277 | -891.154713 | 1.7 | 1.7 |
| 46   | -891.549639 | -891.156578 | 0.2 | 0.5 |
| 47   | -891.547994 | -891.155442 | 1.3 | 1.3 |
| 48   | -891.547195 | -891.155490 | 1.8 | 1.2 |
| 49   | -891.547204 | -891.155429 | 1.8 | 1.3 |
| Avg. | -891.548485 | -891.156220 |     |     |

**Table S28.** Conformational analysis for **3d**.

| Conformer # | E           | G           | DE       | DG       |
|-------------|-------------|-------------|----------|----------|
|             | au          | au          | kcal/mol | kcal/mol |
| 1           | -891.148925 | -890.766835 | 0.0      | 0.3      |
| 2           | -891.148966 | -890.766912 | 0.0      | 0.3      |
| 3           | -891.148947 | -890.766912 | 0.0      | 0.3      |
| 4           | -891.148971 | -890.766861 | 0.0      | 0.3      |
| 5           | -891.148979 | -890.766798 | 0.0      | 0.3      |
| 6           | -891.148955 | -890.767181 | 0.0      | 0.1      |
| 7           | -891.148585 | -890.765921 | 0.2      | 0.9      |
| 8           | -891.148691 | -890.766029 | 0.2      | 0.8      |
| 9           | -891.148552 | -890.765933 | 0.3      | 0.9      |
| 10          | -891.148631 | -890.766072 | 0.2      | 0.8      |
| 11          | -891.147991 | -890.765501 | 0.6      | 1.1      |
| 12          | -891.148113 | -890.765794 | 0.5      | 1.0      |
| 13          | -891.147771 | -890.765508 | 0.8      | 1.1      |
| 14          | -891.147938 | -890.765400 | 0.7      | 1.2      |
| 15          | -891.147497 | -890.764428 | 0.9      | 1.8      |
| 16          | -891.148023 | -890.766333 | 0.6      | 0.6      |
| 17          | -891.148088 | -890.766699 | 0.6      | 0.4      |
| 18          | -891.147300 | -890.764568 | 1.1      | 1.7      |
| 19          | -891.147933 | -890.765965 | 0.7      | 0.9      |
| 20          | -891.147976 | -890.766271 | 0.6      | 0.7      |
| 21          | -891.147994 | -890.766166 | 0.6      | 0.7      |
| 22          | -891.146865 | -890.764240 | 1.3      | 1.9      |
| 23          | -891.146544 | -890.763354 | 1.5      | 2.5      |
| 24          | -891.146591 | -890.763292 | 1.5      | 2.5      |
| 25          | -891.147890 | -890.764631 | 0.7      | 1.7      |
| 26          | -891.146104 | -890.762825 | 1.8      | 2.8      |
| 27          | -891.147844 | -890.764518 | 0.7      | 1.8      |
| 28          | -891.147975 | -890.764624 | 0.6      | 1.7      |
| 29          | -891.147963 | -890.764987 | 0.6      | 1.5      |
| 30          | -891.147764 | -890.765536 | 0.8      | 1.1      |
| 31          | -891.146109 | -890.762999 | 1.8      | 2.7      |
| 32          | -891.147759 | -890.765136 | 0.8      | 1.4      |
| 33          | -891.148938 | -890.767334 | 0.0      | 0.0      |

|      |             |             |     |     |
|------|-------------|-------------|-----|-----|
| 34   | -891.146461 | -890.763868 | 1.6 | 2.2 |
| 35   | -891.146554 | -890.764021 | 1.5 | 2.1 |
| 36   | -891.146547 | -890.764274 | 1.5 | 1.9 |
| 37   | -891.146428 | -890.763836 | 1.6 | 2.2 |
| 38   | -891.147196 | -890.765439 | 1.1 | 1.2 |
| 39   | -891.146527 | -890.764481 | 1.5 | 1.8 |
| 40   | -891.147277 | -890.765779 | 1.1 | 1.0 |
| 41   | -891.146496 | -890.764450 | 1.6 | 1.8 |
| Avg. | -891.148393 | -890.766425 |     |     |

**Table S29.** Conformational analysis for **6d<sup>‡</sup>**.

| Conformer # | E           | G           | DE       | DG       |
|-------------|-------------|-------------|----------|----------|
|             | au          | au          | kcal/mol | kcal/mol |
| 1           | -891.548923 | -891.156934 | 0.0      | 0.5      |
| 2           | -891.548559 | -891.156597 | 0.2      | 0.7      |
| 3           | -891.548883 | -891.156954 | 0.0      | 0.5      |
| 4           | -891.548387 | -891.157190 | 0.3      | 0.3      |
| 5           | -891.548094 | -891.155290 | 0.5      | 1.5      |
| 6           | -891.548055 | -891.155607 | 0.5      | 1.3      |
| 7           | -891.548097 | -891.156010 | 0.5      | 1.1      |
| 8           | -891.547791 | -891.155896 | 0.7      | 1.2      |
| 9           | -891.547987 | -891.155884 | 0.6      | 1.2      |
| 10          | -891.548323 | -891.157742 | 0.4      | 0.0      |
| 11          | -891.545865 | -891.154945 | 1.9      | 1.8      |
| 12          | -891.547333 | -891.154818 | 1.0      | 1.8      |
| 13          | -891.547837 | -891.155972 | 0.7      | 1.1      |
| 14          | -891.546691 | -891.153823 | 1.4      | 2.5      |
| 15          | -891.547142 | -891.154740 | 1.1      | 1.9      |
| 16          | -891.547834 | -891.156365 | 0.7      | 0.9      |
| 17          | -891.545999 | -891.155862 | 1.8      | 1.2      |
| 18          | -891.548028 | -891.156256 | 0.6      | 0.9      |
| 19          | -891.548849 | -891.156628 | 0.0      | 0.7      |
| 20          | -891.547411 | -891.156090 | 0.9      | 1.0      |
| 21          | -891.545865 | -891.154812 | 1.9      | 1.8      |
| 22          | -891.545844 | -891.154215 | 1.9      | 2.2      |
| 23          | -891.548029 | -891.154846 | 0.6      | 1.8      |
| 24          | -891.546532 | -891.153626 | 1.5      | 2.6      |
| 25          | -891.547299 | -891.155934 | 1.0      | 1.1      |
| 26          | -891.547483 | -891.156494 | 0.9      | 0.8      |
| 27          | -891.546156 | -891.153031 | 1.7      | 3.0      |
| 28          | -891.547176 | -891.154070 | 1.1      | 2.3      |
| 29          | -891.548054 | -891.155343 | 0.5      | 1.5      |
| 30          | -891.547852 | -891.156715 | 0.7      | 0.6      |
| 31          | -891.547721 | -891.155300 | 0.8      | 1.5      |
| 32          | -891.547456 | -891.156413 | 0.9      | 0.8      |

|      |             |             |     |     |
|------|-------------|-------------|-----|-----|
| 33   | -891.547451 | -891.156387 | 0.9 | 0.9 |
| 34   | -891.547183 | -891.155211 | 1.1 | 1.6 |
| 35   | -891.547324 | -891.155488 | 1.0 | 1.4 |
| 36   | -891.546012 | -891.155493 | 1.8 | 1.4 |
| 37   | -891.546972 | -891.155454 | 1.2 | 1.4 |
| 38   | -891.547188 | -891.155954 | 1.1 | 1.1 |
| 39   | -891.547749 | -891.155601 | 0.7 | 1.3 |
| 40   | -891.547338 | -891.155571 | 1.0 | 1.4 |
| 41   | -891.546866 | -891.156237 | 1.3 | 0.9 |
| 42   | -891.546870 | -891.155792 | 1.3 | 1.2 |
| 43   | -891.546946 | -891.155379 | 1.2 | 1.5 |
| 44   | -891.546818 | -891.153825 | 1.3 | 2.5 |
| 45   | -891.547473 | -891.155334 | 0.9 | 1.5 |
| 46   | -891.547052 | -891.154846 | 1.2 | 1.8 |
| 47   | -891.548092 | -891.156277 | 0.5 | 0.9 |
| 48   | -891.547252 | -891.155221 | 1.0 | 1.6 |
| 49   | -891.547071 | -891.155229 | 1.2 | 1.6 |
| 50   | -891.546549 | -891.154673 | 1.5 | 1.9 |
| 51   | -891.547060 | -891.154652 | 1.2 | 1.9 |
| 52   | -891.547841 | -891.156012 | 0.7 | 1.1 |
| Avg. | -891.547961 | -891.156373 |     |     |

**Table S30.** Conformational analysis for **6d**.

| Conformer # | E           | G           | DE       | DG       |
|-------------|-------------|-------------|----------|----------|
|             | au          | au          | kcal/mol | kcal/mol |
| 1           | -891.143484 | -890.761076 | 0.0      | 0.0      |
| 2           | -891.142706 | -890.760054 | 0.5      | 0.6      |
| 3           | -891.142589 | -890.760799 | 0.6      | 0.2      |
| 4           | -891.142823 | -890.760066 | 0.4      | 0.6      |
| 5           | -891.141920 | -890.759398 | 1.0      | 1.1      |
| 6           | -891.142444 | -890.759539 | 0.7      | 1.0      |
| 7           | -891.142543 | -890.759831 | 0.6      | 0.8      |
| 8           | -891.142364 | -890.759283 | 0.7      | 1.1      |
| 9           | -891.142266 | -890.759754 | 0.8      | 0.8      |
| 10          | -891.143093 | -890.760900 | 0.2      | 0.1      |
| 11          | -891.142302 | -890.759756 | 0.7      | 0.8      |
| 12          | -891.142516 | -890.760399 | 0.6      | 0.4      |
| 13          | -891.142035 | -890.759761 | 0.9      | 0.8      |
| 14          | -891.140525 | -890.757301 | 1.9      | 2.4      |
| 15          | -891.141632 | -890.759424 | 1.2      | 1.0      |
| 16          | -891.142908 | -890.760813 | 0.4      | 0.2      |
| 17          | -891.140833 | -890.758299 | 1.7      | 1.7      |
| 18          | -891.141590 | -890.759113 | 1.2      | 1.2      |
| 19          | -891.142085 | -890.759222 | 0.9      | 1.2      |
| 20          | -891.142111 | -890.759542 | 0.9      | 1.0      |

|      |             |             |     |     |
|------|-------------|-------------|-----|-----|
| 21   | -891.141866 | -890.759604 | 1.0 | 0.9 |
| 22   | -891.141048 | -890.758849 | 1.5 | 1.4 |
| 23   | -891.142060 | -890.758919 | 0.9 | 1.4 |
| 24   | -891.142598 | -890.760354 | 0.6 | 0.5 |
| 25   | -891.142050 | -890.758816 | 0.9 | 1.4 |
| 26   | -891.142014 | -890.759400 | 0.9 | 1.1 |
| 27   | -891.141631 | -890.759501 | 1.2 | 1.0 |
| 28   | -891.141470 | -890.758764 | 1.3 | 1.5 |
| 29   | -891.141532 | -890.759114 | 1.2 | 1.2 |
| 30   | -891.140933 | -890.757822 | 1.6 | 2.0 |
| 31   | -891.141901 | -890.759696 | 1.0 | 0.9 |
| 32   | -891.142235 | -890.760126 | 0.8 | 0.6 |
| 33   | -891.140961 | -890.757802 | 1.6 | 2.1 |
| 34   | -891.142737 | -890.760059 | 0.5 | 0.6 |
| 35   | -891.140325 | -890.757764 | 2.0 | 2.1 |
| 36   | -891.142003 | -890.759865 | 0.9 | 0.8 |
| 37   | -891.140447 | -890.757901 | 1.9 | 2.0 |
| 38   | -891.140880 | -890.758444 | 1.6 | 1.7 |
| 39   | -891.140386 | -890.757022 | 1.9 | 2.5 |
| 40   | -891.140724 | -890.757950 | 1.7 | 2.0 |
| 41   | -891.140452 | -890.756978 | 1.9 | 2.6 |
| 42   | -891.140909 | -890.759193 | 1.6 | 1.2 |
| 43   | -891.141259 | -890.757931 | 1.4 | 2.0 |
| 44   | -891.141685 | -890.759024 | 1.1 | 1.3 |
| 45   | -891.140331 | -890.756429 | 2.0 | 2.9 |
| Avg. | -891.142375 | -890.760065 |     |     |

**Table S31.** Conformational analysis for **3e<sup>†</sup>**.

| Conformer # | E           | G           | DE       | DG       |
|-------------|-------------|-------------|----------|----------|
|             | au          | au          | kcal/mol | kcal/mol |
| 1           | -930.846885 | -930.427415 | 0.7      | 1.3      |
| 2           | -930.847514 | -930.427702 | 0.3      | 1.1      |
| 3           | -930.847957 | -930.429431 | 0.0      | 0.0      |
| 4           | -930.845969 | -930.427633 | 1.2      | 1.1      |
| 5           | -930.845088 | -930.426705 | 1.8      | 1.7      |
| 6           | -930.845633 | -930.426275 | 1.5      | 2.0      |
| 7           | -930.845025 | -930.426658 | 1.8      | 1.7      |
| 8           | -930.846665 | -930.426950 | 0.8      | 1.6      |
| 9           | -930.845467 | -930.425819 | 1.6      | 2.3      |
| 10          | -930.847378 | -930.427542 | 0.4      | 1.2      |
| 11          | -930.846029 | -930.426942 | 1.2      | 1.6      |
| 12          | -930.846878 | -930.427977 | 0.7      | 0.9      |
| 13          | -930.847025 | -930.428228 | 0.6      | 0.8      |
| 14          | -930.847010 | -930.428256 | 0.6      | 0.7      |
| 15          | -930.846660 | -930.426954 | 0.8      | 1.6      |



|    |             |             |     |     |
|----|-------------|-------------|-----|-----|
| 16 | -930.845656 | -930.427600 | 1.4 | 1.1 |
| 17 | -930.845029 | -930.427305 | 1.8 | 1.3 |
| 18 | -930.846961 | -930.428387 | 0.6 | 0.7 |
| 19 | -930.845119 | -930.426411 | 1.8 | 1.9 |
| 20 | -930.845654 | -930.427957 | 1.4 | 0.9 |
| 21 | -930.845660 | -930.425833 | 1.4 | 2.3 |
| 22 | -930.845019 | -930.426664 | 1.8 | 1.7 |
| 23 | -930.845891 | -930.427481 | 1.3 | 1.2 |
| 24 | -930.845788 | -930.426121 | 1.4 | 2.1 |
| 25 | -930.845785 | -930.426254 | 1.4 | 2.0 |
| 26 | -930.846523 | -930.426776 | 0.9 | 1.7 |
| 27 | -930.846157 | -930.426495 | 1.1 | 1.8 |
| 28 | -930.846450 | -930.426447 | 0.9 | 1.9 |
| 29 | -930.845010 | -930.426481 | 1.8 | 1.9 |
| 30 | -930.845206 | -930.426637 | 1.7 | 1.8 |
| 31 | -930.846718 | -930.427591 | 0.8 | 1.2 |
| 32 | -930.846727 | -930.428135 | 0.8 | 0.8 |
| 33 | -930.847151 | -930.429151 | 0.5 | 0.2 |
| 34 | -930.844811 | -930.425903 | 2.0 | 2.2 |
| 35 | -930.845431 | -930.426386 | 1.6 | 1.9 |
| 36 | -930.845705 | -930.426546 | 1.4 | 1.8 |
| 37 | -930.846584 | -930.426997 | 0.9 | 1.5 |
| 38 | -930.845084 | -930.426514 | 1.8 | 1.8 |
| 39 | -930.844847 | -930.426739 | 2.0 | 1.7 |
| 40 | -930.846157 | -930.427602 | 1.1 | 1.1 |
| 41 | -930.844954 | -930.426535 | 1.9 | 1.8 |
| 42 | -930.846096 | -930.427598 | 1.2 | 1.2 |
| 43 | -930.845464 | -930.425829 | 1.6 | 2.3 |
| 44 | -930.845813 | -930.426610 | 1.3 | 1.8 |
| 45 | -930.845190 | -930.427971 | 1.7 | 0.9 |
| 46 | -930.846096 | -930.427337 | 1.2 | 1.3 |
| 47 | -930.845092 | -930.426522 | 1.8 | 1.8 |
| 48 | -930.844973 | -930.425446 | 1.9 | 2.5 |
| 49 | -930.844985 | -930.426121 | 1.9 | 2.1 |
| 50 | -930.845098 | -930.426225 | 1.8 | 2.0 |
| 51 | -930.845711 | -930.425838 | 1.4 | 2.3 |
| 52 | -930.846306 | -930.426604 | 1.0 | 1.8 |
| 53 | -930.845713 | -930.425219 | 1.4 | 2.6 |
| 54 | -930.844920 | -930.425766 | 1.9 | 2.3 |
| 55 | -930.846602 | -930.427261 | 0.9 | 1.4 |
| 56 | -930.845778 | -930.425343 | 1.4 | 2.6 |
| 57 | -930.845614 | -930.426137 | 1.5 | 2.1 |
| 58 | -930.846600 | -930.427065 | 0.9 | 1.5 |
| 59 | -930.845889 | -930.425777 | 1.3 | 2.3 |
| 60 | -930.845890 | -930.425786 | 1.3 | 2.3 |

|      |             |             |     |     |
|------|-------------|-------------|-----|-----|
| 61   | -930.845890 | -930.426248 | 1.3 | 2.0 |
| 62   | -930.846024 | -930.426705 | 1.2 | 1.7 |
| 63   | -930.844920 | -930.424618 | 1.9 | 3.0 |
| 64   | -930.845273 | -930.425324 | 1.7 | 2.6 |
| 65   | -930.845917 | -930.426569 | 1.3 | 1.8 |
| 66   | -930.844850 | -930.425323 | 1.9 | 2.6 |
| 67   | -930.845917 | -930.427776 | 1.3 | 1.0 |
| 68   | -930.846658 | -930.427081 | 0.8 | 1.5 |
| 69   | -930.845812 | -930.427578 | 1.3 | 1.2 |
| Avg. | -930.846556 | -930.427858 |     |     |

**Table S32.** Conformational analysis for **3e**.

| Conformer # | E           | G           | DE       | DG       |
|-------------|-------------|-------------|----------|----------|
|             | au          | au          | kcal/mol | kcal/mol |
| 1           | -930.448677 | -930.039514 | 0.1      | 0.3      |
| 2           | -930.448456 | -930.039420 | 0.2      | 0.3      |
| 3           | -930.448409 | -930.039326 | 0.3      | 0.4      |
| 4           | -930.448635 | -930.039287 | 0.1      | 0.4      |
| 5           | -930.448712 | -930.039876 | 0.1      | 0.0      |
| 6           | -930.448650 | -930.039320 | 0.1      | 0.4      |
| 7           | -930.448568 | -930.039827 | 0.2      | 0.1      |
| 8           | -930.448693 | -930.039342 | 0.1      | 0.4      |
| 9           | -930.448750 | -930.039397 | 0.0      | 0.3      |
| 10          | -930.448817 | -930.039314 | 0.0      | 0.4      |
| 11          | -930.448156 | -930.038369 | 0.4      | 1.0      |
| 12          | -930.448433 | -930.038473 | 0.2      | 0.9      |
| 13          | -930.448095 | -930.038380 | 0.5      | 1.0      |
| 14          | -930.448729 | -930.039594 | 0.1      | 0.2      |
| 15          | -930.448396 | -930.038569 | 0.3      | 0.8      |
| 16          | -930.447767 | -930.038388 | 0.7      | 1.0      |
| 17          | -930.447468 | -930.037948 | 0.8      | 1.2      |
| 18          | -930.447254 | -930.037208 | 1.0      | 1.7      |
| 19          | -930.447568 | -930.038181 | 0.8      | 1.1      |
| 20          | -930.447447 | -930.038049 | 0.9      | 1.2      |
| 21          | -930.448541 | -930.038497 | 0.2      | 0.9      |
| 22          | -930.448307 | -930.038373 | 0.3      | 1.0      |
| 23          | -930.447556 | -930.038648 | 0.8      | 0.8      |
| 24          | -930.447652 | -930.038444 | 0.7      | 0.9      |
| 25          | -930.447634 | -930.037199 | 0.7      | 1.7      |
| 26          | -930.447651 | -930.038605 | 0.7      | 0.8      |
| 27          | -930.447583 | -930.038555 | 0.8      | 0.9      |
| 28          | -930.448428 | -930.038467 | 0.2      | 0.9      |
| 29          | -930.446474 | -930.036058 | 1.5      | 2.4      |
| 30          | -930.447652 | -930.038610 | 0.7      | 0.8      |
| 31          | -930.447819 | -930.038323 | 0.6      | 1.0      |

|      |             |             |     |     |
|------|-------------|-------------|-----|-----|
| 32   | -930.447614 | -930.038634 | 0.8 | 0.8 |
| 33   | -930.447897 | -930.038015 | 0.6 | 1.2 |
| 34   | -930.447532 | -930.037912 | 0.8 | 1.3 |
| 35   | -930.447540 | -930.037239 | 0.8 | 1.7 |
| 36   | -930.447748 | -930.037931 | 0.7 | 1.2 |
| 37   | -930.446506 | -930.036517 | 1.5 | 2.1 |
| 38   | -930.446357 | -930.036742 | 1.5 | 2.0 |
| 39   | -930.447822 | -930.038776 | 0.6 | 0.7 |
| 40   | -930.447698 | -930.038589 | 0.7 | 0.8 |
| 41   | -930.447857 | -930.038686 | 0.6 | 0.8 |
| 42   | -930.447717 | -930.038351 | 0.7 | 1.0 |
| 43   | -930.446327 | -930.036742 | 1.6 | 2.0 |
| 44   | -930.447711 | -930.038361 | 0.7 | 1.0 |
| 45   | -930.447705 | -930.038521 | 0.7 | 0.9 |
| 46   | -930.447721 | -930.038520 | 0.7 | 0.9 |
| 47   | -930.447463 | -930.037153 | 0.8 | 1.7 |
| 48   | -930.447476 | -930.037087 | 0.8 | 1.8 |
| 49   | -930.446622 | -930.036757 | 1.4 | 2.0 |
| 50   | -930.447690 | -930.037232 | 0.7 | 1.7 |
| 51   | -930.446434 | -930.036444 | 1.5 | 2.2 |
| 52   | -930.447382 | -930.037699 | 0.9 | 1.4 |
| 53   | -930.447457 | -930.037722 | 0.9 | 1.4 |
| 54   | -930.445744 | -930.035914 | 1.9 | 2.5 |
| 55   | -930.447445 | -930.037599 | 0.9 | 1.5 |
| 56   | -930.447401 | -930.037626 | 0.9 | 1.4 |
| 57   | -930.447714 | -930.037074 | 0.7 | 1.8 |
| 58   | -930.445890 | -930.035303 | 1.8 | 2.9 |
| 59   | -930.447748 | -930.037130 | 0.7 | 1.7 |
| 60   | -930.447426 | -930.037724 | 0.9 | 1.4 |
| 61   | -930.447603 | -930.037723 | 0.8 | 1.4 |
| 62   | -930.447607 | -930.037564 | 0.8 | 1.5 |
| 63   | -930.447565 | -930.037384 | 0.8 | 1.6 |
| 64   | -930.446690 | -930.038090 | 1.3 | 1.1 |
| 65   | -930.448666 | -930.039913 | 0.1 | 0.0 |
| 66   | -930.446736 | -930.038804 | 1.3 | 0.7 |
| Avg. | -930.448123 | -930.038934 |     |     |

**Table S33.** Conformational analysis for **6e<sup>‡</sup>**.

| Conformer # | E           | G           | DE       | DG       |
|-------------|-------------|-------------|----------|----------|
|             | au          | au          | kcal/mol | kcal/mol |
| 1           | -930.848149 | -930.428928 | 0.0      | 0.6      |
| 2           | -930.848189 | -930.429914 | 0.0      | 0.0      |
| 3           | -930.848075 | -930.429871 | 0.1      | 0.0      |
| 4           | -930.847801 | -930.428521 | 0.3      | 0.9      |
| 5           | -930.847333 | -930.427981 | 0.5      | 1.2      |
| 6           | -930.846440 | -930.427005 | 1.1      | 1.8      |
| 7           | -930.847810 | -930.428248 | 0.2      | 1.0      |
| 8           | -930.847157 | -930.428045 | 0.7      | 1.2      |
| 9           | -930.847317 | -930.428272 | 0.6      | 1.0      |
| 10          | -930.847379 | -930.428666 | 0.5      | 0.8      |
| 11          | -930.847303 | -930.428565 | 0.6      | 0.8      |
| 12          | -930.847116 | -930.428155 | 0.7      | 1.1      |
| 13          | -930.847155 | -930.428710 | 0.7      | 0.8      |
| 14          | -930.847209 | -930.428743 | 0.6      | 0.7      |
| 15          | -930.846545 | -930.427583 | 1.0      | 1.5      |
| 16          | -930.846222 | -930.426390 | 1.2      | 2.2      |
| 17          | -930.845344 | -930.426772 | 1.8      | 2.0      |
| 18          | -930.845632 | -930.427003 | 1.6      | 1.8      |
| 19          | -930.845350 | -930.427365 | 1.8      | 1.6      |
| 20          | -930.847157 | -930.429178 | 0.7      | 0.5      |
| 21          | -930.846268 | -930.427519 | 1.2      | 1.5      |
| 22          | -930.847097 | -930.427281 | 0.7      | 1.7      |
| 23          | -930.847154 | -930.427252 | 0.7      | 1.7      |
| 24          | -930.847178 | -930.427455 | 0.6      | 1.5      |
| 25          | -930.846223 | -930.425947 | 1.2      | 2.5      |
| 26          | -930.846052 | -930.427667 | 1.4      | 1.4      |
| 27          | -930.847402 | -930.427716 | 0.5      | 1.4      |
| 28          | -930.846927 | -930.427463 | 0.8      | 1.5      |
| 29          | -930.845048 | -930.425477 | 2.0      | 2.8      |
| 30          | -930.846067 | -930.427486 | 1.3      | 1.5      |
| 31          | -930.846021 | -930.426906 | 1.4      | 1.9      |
| 32          | -930.847328 | -930.428397 | 0.6      | 1.0      |
| 33          | -930.845519 | -930.426113 | 1.7      | 2.4      |
| 34          | -930.846697 | -930.426372 | 0.9      | 2.2      |
| 35          | -930.844570 | -930.425327 | 2.3      | 2.9      |
| 36          | -930.846387 | -930.427475 | 1.1      | 1.5      |
| 37          | -930.847408 | -930.428608 | 0.5      | 0.8      |
| 38          | -930.845529 | -930.426337 | 1.7      | 2.2      |
| 39          | -930.846016 | -930.426673 | 1.4      | 2.0      |
| 40          | -930.846277 | -930.427521 | 1.2      | 1.5      |
| 41          | -930.846028 | -930.426782 | 1.4      | 2.0      |
| 42          | -930.845533 | -930.426376 | 1.7      | 2.2      |

|      |             |             |     |     |
|------|-------------|-------------|-----|-----|
| 43   | -930.845425 | -930.426231 | 1.7 | 2.3 |
| 44   | -930.845133 | -930.426678 | 1.9 | 2.0 |
| 45   | -930.845217 | -930.426402 | 1.9 | 2.2 |
| 46   | -930.846399 | -930.427369 | 1.1 | 1.6 |
| 47   | -930.846326 | -930.427528 | 1.2 | 1.5 |
| 48   | -930.846523 | -930.426657 | 1.1 | 2.0 |
| 49   | -930.845257 | -930.426930 | 1.9 | 1.9 |
| 50   | -930.846452 | -930.427642 | 1.1 | 1.4 |
| 51   | -930.845164 | -930.426723 | 1.9 | 2.0 |
| 52   | -930.846778 | -930.427444 | 0.9 | 1.6 |
| 53   | -930.846306 | -930.427049 | 1.2 | 1.8 |
| 54   | -930.846111 | -930.426466 | 1.3 | 2.2 |
| 55   | -930.845036 | -930.425388 | 2.0 | 2.8 |
| 56   | -930.845425 | -930.427370 | 1.7 | 1.6 |
| 57   | -930.845447 | -930.426800 | 1.7 | 2.0 |
| 58   | -930.846524 | -930.426555 | 1.1 | 2.1 |
| 59   | -930.846832 | -930.427706 | 0.9 | 1.4 |
| 60   | -930.846233 | -930.426931 | 1.2 | 1.9 |
| 61   | -930.845364 | -930.426000 | 1.8 | 2.5 |
| 62   | -930.846289 | -930.427727 | 1.2 | 1.4 |
| 63   | -930.845545 | -930.425431 | 1.7 | 2.8 |
| 64   | -930.847060 | -930.427052 | 0.7 | 1.8 |
| 65   | -930.846769 | -930.428268 | 0.9 | 1.0 |
| 66   | -930.845357 | -930.426751 | 1.8 | 2.0 |
| 67   | -930.845188 | -930.426611 | 1.9 | 2.1 |
| 68   | -930.846064 | -930.425828 | 1.3 | 2.6 |
| 69   | -930.845233 | -930.425146 | 1.9 | 3.0 |
| Avg. | -930.847121 | -930.428490 |     |     |

**Table S34.** Conformational analysis for **6e**.

| Conformer # | E           | G           | DE       | DG       |
|-------------|-------------|-------------|----------|----------|
|             | au          | au          | kcal/mol | kcal/mol |
| 1           | -930.445612 | -930.035836 | 0.3      | 0.5      |
| 2           | -930.446149 | -930.036623 | 0.0      | 0.0      |
| 3           | -930.445783 | -930.035914 | 0.2      | 0.4      |
| 4           | -930.445757 | -930.035460 | 0.2      | 0.7      |
| 5           | -930.445419 | -930.035132 | 0.5      | 0.9      |
| 6           | -930.445868 | -930.036117 | 0.2      | 0.3      |
| 7           | -930.445979 | -930.036240 | 0.1      | 0.2      |
| 8           | -930.445052 | -930.034707 | 0.7      | 1.2      |
| 9           | -930.445721 | -930.034587 | 0.3      | 1.3      |
| 10          | -930.444747 | -930.034621 | 0.9      | 1.3      |
| 11          | -930.445272 | -930.035569 | 0.6      | 0.7      |
| 12          | -930.445914 | -930.035739 | 0.1      | 0.6      |
| 13          | -930.445411 | -930.035639 | 0.5      | 0.6      |

|      |             |             |     |     |
|------|-------------|-------------|-----|-----|
| 14   | -930.445422 | -930.034705 | 0.5 | 1.2 |
| 15   | -930.446099 | -930.035555 | 0.0 | 0.7 |
| 16   | -930.444380 | -930.034302 | 1.1 | 1.5 |
| 17   | -930.444578 | -930.034505 | 1.0 | 1.3 |
| 18   | -930.444962 | -930.034415 | 0.7 | 1.4 |
| 19   | -930.444430 | -930.034186 | 1.1 | 1.5 |
| 20   | -930.444735 | -930.034365 | 0.9 | 1.4 |
| 21   | -930.445187 | -930.035036 | 0.6 | 1.0 |
| 22   | -930.444654 | -930.033920 | 0.9 | 1.7 |
| 23   | -930.445307 | -930.034915 | 0.5 | 1.1 |
| 24   | -930.443769 | -930.033466 | 1.5 | 2.0 |
| 25   | -930.444564 | -930.033966 | 1.0 | 1.7 |
| 26   | -930.445857 | -930.035067 | 0.2 | 1.0 |
| 27   | -930.443236 | -930.033279 | 1.8 | 2.1 |
| 28   | -930.445118 | -930.034770 | 0.6 | 1.2 |
| 29   | -930.443970 | -930.033158 | 1.4 | 2.2 |
| 30   | -930.444294 | -930.033506 | 1.2 | 2.0 |
| 31   | -930.444958 | -930.033984 | 0.7 | 1.7 |
| 32   | -930.444189 | -930.032896 | 1.2 | 2.3 |
| 33   | -930.443740 | -930.033289 | 1.5 | 2.1 |
| 34   | -930.443265 | -930.033445 | 1.8 | 2.0 |
| 35   | -930.443360 | -930.034220 | 1.8 | 1.5 |
| Avg. | -930.445484 | -930.035539 |     |     |

**Table S35.** Conformational analysis for **3<sup>‡</sup>**.

| Conformer # | E           | G           | DE       | DG       |
|-------------|-------------|-------------|----------|----------|
|             | au          | au          | kcal/mol | kcal/mol |
| 1           | -970.149986 | -969.702432 | 0.8      | 2.0      |
| 2           | -970.149657 | -969.702714 | 1.0      | 1.9      |
| 3           | -970.150959 | -969.705430 | 0.2      | 0.2      |
| 4           | -970.150051 | -969.701891 | 0.7      | 2.4      |
| 5           | -970.149943 | -969.704785 | 0.8      | 0.6      |
| 6           | -970.150353 | -969.704788 | 0.5      | 0.6      |
| 7           | -970.149361 | -969.701516 | 1.2      | 2.6      |
| 8           | -970.151216 | -969.704513 | 0.0      | 0.7      |
| 9           | -970.148727 | -969.702113 | 1.6      | 2.2      |
| 10          | -970.148406 | -969.703503 | 1.8      | 1.4      |
| 11          | -970.148991 | -969.703339 | 1.4      | 1.5      |
| 12          | -970.149076 | -969.703186 | 1.3      | 1.6      |
| 13          | -970.150015 | -969.704918 | 0.8      | 0.5      |
| 14          | -970.149571 | -969.702810 | 1.0      | 1.8      |
| 15          | -970.150382 | -969.704315 | 0.5      | 0.9      |
| 16          | -970.148851 | -969.703496 | 1.5      | 1.4      |
| 17          | -970.149107 | -969.702954 | 1.3      | 1.7      |
| 18          | -970.148443 | -969.700737 | 1.7      | 3.1      |

|    |             |             |     |     |
|----|-------------|-------------|-----|-----|
| 19 | -970.149036 | -969.703456 | 1.4 | 1.4 |
| 20 | -970.149047 | -969.703657 | 1.4 | 1.3 |
| 21 | -970.149399 | -969.703876 | 1.1 | 1.1 |
| 22 | -970.148882 | -969.702192 | 1.5 | 2.2 |
| 23 | -970.149917 | -969.704068 | 0.8 | 1.0 |
| 24 | -970.148787 | -969.701814 | 1.5 | 2.4 |
| 25 | -970.148922 | -969.701161 | 1.4 | 2.8 |
| 26 | -970.148911 | -969.703762 | 1.4 | 1.2 |
| 27 | -970.150618 | -969.705681 | 0.4 | 0.0 |
| 28 | -970.150526 | -969.703895 | 0.4 | 1.1 |
| 29 | -970.149103 | -969.701101 | 1.3 | 2.9 |
| 30 | -970.150124 | -969.704138 | 0.7 | 1.0 |
| 31 | -970.148497 | -969.700165 | 1.7 | 3.5 |
| 32 | -970.148240 | -969.701313 | 1.9 | 2.7 |
| 33 | -970.148149 | -969.700881 | 1.9 | 3.0 |
| 34 | -970.148646 | -969.704034 | 1.6 | 1.0 |
| 35 | -970.148819 | -969.703753 | 1.5 | 1.2 |
| 36 | -970.149181 | -969.702369 | 1.3 | 2.1 |
| 37 | -970.148288 | -969.700542 | 1.8 | 3.2 |
| 38 | -970.148704 | -969.704373 | 1.6 | 0.8 |
| 39 | -970.148888 | -969.702478 | 1.5 | 2.0 |
| 40 | -970.148835 | -969.702389 | 1.5 | 2.1 |
| 41 | -970.148874 | -969.702885 | 1.5 | 1.8 |
| 42 | -970.150191 | -969.703347 | 0.6 | 1.5 |
| 43 | -970.148428 | -969.700671 | 1.7 | 3.1 |
| 44 | -970.148420 | -969.702972 | 1.8 | 1.7 |
| 45 | -970.148156 | -969.701030 | 1.9 | 2.9 |
| 46 | -970.149392 | -969.704329 | 1.1 | 0.8 |
| 47 | -970.149337 | -969.703999 | 1.2 | 1.1 |
| 48 | -970.149096 | -969.703276 | 1.3 | 1.5 |
| 49 | -970.149147 | -969.704446 | 1.3 | 0.8 |
| 50 | -970.149358 | -969.703964 | 1.2 | 1.1 |
| 51 | -970.148617 | -969.702477 | 1.6 | 2.0 |
| 52 | -970.149442 | -969.702475 | 1.1 | 2.0 |
| 53 | -970.148090 | -969.702073 | 2.0 | 2.3 |
| 54 | -970.149050 | -969.702803 | 1.4 | 1.8 |
| 55 | -970.148354 | -969.702959 | 1.8 | 1.7 |
| 65 | -970.148577 | -969.703023 | 1.7 | 1.7 |
| 57 | -970.148739 | -969.702198 | 1.6 | 2.2 |
| 58 | -970.148351 | -969.699770 | 1.8 | 3.7 |
| 59 | -970.148697 | -969.702457 | 1.6 | 2.0 |
| 60 | -970.148952 | -969.703212 | 1.4 | 1.5 |
| 61 | -970.147645 | -969.702877 | 2.2 | 1.8 |
| 62 | -970.147399 | -969.703433 | 2.4 | 1.4 |
| 63 | -970.148788 | -969.702985 | 1.5 | 1.7 |

|      |             |             |     |     |
|------|-------------|-------------|-----|-----|
| 64   | -970.149224 | -969.702948 | 1.3 | 1.7 |
| 65   | -970.148103 | -969.702568 | 2.0 | 2.0 |
| 66   | -970.148998 | -969.702645 | 1.4 | 1.9 |
| 67   | -970.148171 | -969.703075 | 1.9 | 1.6 |
| 68   | -970.148179 | -969.703298 | 1.9 | 1.5 |
| 69   | -970.149223 | -969.703443 | 1.3 | 1.4 |
| 70   | -970.148733 | -969.703206 | 1.6 | 1.6 |
| 71   | -970.149213 | -969.703368 | 1.3 | 1.5 |
| Avg. | -970.149801 | -969.704235 |     |     |

**Table S36.** Conformational analysis for **3**.

| Conformer # | E           | G           | DE       | DG       |
|-------------|-------------|-------------|----------|----------|
|             | au          | au          | kcal/mol | kcal/mol |
| 1           | -969.749488 | -969.313668 | 0.1      | 0.4      |
| 2           | -969.749585 | -969.313988 | 0.0      | 0.2      |
| 3           | -969.749589 | -969.313840 | 0.0      | 0.3      |
| 4           | -969.749541 | -969.314285 | 0.0      | 0.0      |
| 5           | -969.749511 | -969.314204 | 0.0      | 0.1      |
| 6           | -969.748738 | -969.311936 | 0.5      | 1.5      |
| 7           | -969.749217 | -969.312672 | 0.2      | 1.0      |
| 8           | -969.748395 | -969.311813 | 0.7      | 1.6      |
| 9           | -969.749348 | -969.313063 | 0.2      | 0.8      |
| 10          | -969.749157 | -969.312829 | 0.3      | 0.9      |
| 11          | -969.749267 | -969.312779 | 0.2      | 0.9      |
| 12          | -969.748655 | -969.312527 | 0.6      | 1.1      |
| 13          | -969.748490 | -969.312409 | 0.7      | 1.2      |
| 14          | -969.747530 | -969.310756 | 1.3      | 2.2      |
| 15          | -969.746865 | -969.311067 | 1.7      | 2.0      |
| 16          | -969.746830 | -969.311241 | 1.7      | 1.9      |
| 17          | -969.748590 | -969.312958 | 0.6      | 0.8      |
| 18          | -969.748586 | -969.312943 | 0.6      | 0.8      |
| 19          | -969.748568 | -969.313014 | 0.6      | 0.8      |
| 20          | -969.748673 | -969.313174 | 0.6      | 0.7      |
| 21          | -969.748551 | -969.313168 | 0.7      | 0.7      |
| 22          | -969.747437 | -969.311048 | 1.4      | 2.0      |
| 23          | -969.747502 | -969.310991 | 1.3      | 2.1      |
| 24          | -969.748579 | -969.311508 | 0.6      | 1.7      |
| 25          | -969.748452 | -969.311566 | 0.7      | 1.7      |
| 26          | -969.748662 | -969.311923 | 0.6      | 1.5      |
| 27          | -969.748563 | -969.311756 | 0.6      | 1.6      |
| 28          | -969.746588 | -969.310127 | 1.9      | 2.6      |
| 29          | -969.748393 | -969.312080 | 0.8      | 1.4      |
| 30          | -969.748325 | -969.312155 | 0.8      | 1.3      |
| 31          | -969.746739 | -969.310175 | 1.8      | 2.6      |
| 32          | -969.748403 | -969.312225 | 0.7      | 1.3      |



|      |             |             |     |     |
|------|-------------|-------------|-----|-----|
| 33   | -969.748402 | -969.312325 | 0.7 | 1.2 |
| 34   | -969.749001 | -969.313797 | 0.4 | 0.3 |
| 35   | -969.747519 | -969.313772 | 1.3 | 0.3 |
| Avg. | -969.748976 | -969.313407 |     |     |

**Table S37.** Conformational analysis for **6<sup>‡</sup>**.

| Conformer # | E           | G           | DE       | DG       |
|-------------|-------------|-------------|----------|----------|
|             | au          | au          | kcal/mol | kcal/mol |
| 1           | -970.151611 | -969.705475 | 0.0      | 0.5      |
| 2           | -970.150983 | -969.705090 | 0.4      | 0.7      |
| 3           | -970.151103 | -969.704330 | 0.3      | 1.2      |
| 4           | -970.150612 | -969.703863 | 0.6      | 1.5      |
| 5           | -970.150697 | -969.704512 | 0.6      | 1.1      |
| 6           | -970.150465 | -969.703822 | 0.7      | 1.5      |
| 7           | -970.150627 | -969.704667 | 0.6      | 1.0      |
| 8           | -970.150532 | -969.704657 | 0.7      | 1.0      |
| 9           | -970.149938 | -969.703583 | 1.0      | 1.6      |
| 10          | -970.149180 | -969.702673 | 1.5      | 2.2      |
| 11          | -970.149921 | -969.703549 | 1.1      | 1.7      |
| 12          | -970.150546 | -969.703315 | 0.7      | 1.8      |
| 13          | -970.149928 | -969.704924 | 1.1      | 0.8      |
| 14          | -970.149688 | -969.702591 | 1.2      | 2.3      |
| 15          | -970.148670 | -969.701924 | 1.8      | 2.7      |
| 16          | -970.150108 | -969.705078 | 0.9      | 0.7      |
| 17          | -970.150401 | -969.703800 | 0.8      | 1.5      |
| 18          | -970.150059 | -969.705883 | 1.0      | 0.2      |
| 19          | -970.149140 | -969.701860 | 1.6      | 2.7      |
| 20          | -970.148589 | -969.701570 | 1.9      | 2.9      |
| 21          | -970.149057 | -969.704102 | 1.6      | 1.3      |
| 22          | -970.149018 | -969.703816 | 1.6      | 1.5      |
| 23          | -970.148754 | -969.702214 | 1.8      | 2.5      |
| 24          | -970.149622 | -969.704205 | 1.2      | 1.3      |
| 25          | -970.149082 | -969.704337 | 1.6      | 1.2      |
| 26          | -970.149115 | -969.704440 | 1.6      | 1.1      |
| 27          | -970.151501 | -969.706202 | 0.1      | 0.0      |
| 28          | -970.149097 | -969.704296 | 1.6      | 1.2      |
| 29          | -970.148982 | -969.703721 | 1.6      | 1.6      |
| 30          | -970.148886 | -969.704310 | 1.7      | 1.2      |
| 31          | -970.149064 | -969.704529 | 1.6      | 1.0      |
| 32          | -970.149924 | -969.703080 | 1.1      | 2.0      |
| 33          | -970.150970 | -969.705255 | 0.4      | 0.6      |
| 34          | -970.150073 | -969.703983 | 1.0      | 1.4      |
| 35          | -970.148594 | -969.702862 | 1.9      | 2.1      |
| 36          | -970.148480 | -969.702567 | 2.0      | 2.3      |
| 37          | -970.150286 | -969.704567 | 0.8      | 1.0      |

|      |             |             |     |     |
|------|-------------|-------------|-----|-----|
| 38   | -970.148870 | -969.703212 | 1.7 | 1.9 |
| 39   | -970.148730 | -969.702794 | 1.8 | 2.1 |
| 40   | -970.150580 | -969.703816 | 0.6 | 1.5 |
| 41   | -970.149991 | -969.703299 | 1.0 | 1.8 |
| 42   | -970.148718 | -969.702819 | 1.8 | 2.1 |
| 43   | -970.148452 | -969.703017 | 2.0 | 2.0 |
| 44   | -970.149688 | -969.702925 | 1.2 | 2.1 |
| Avg. | -970.150525 | -969.704908 |     |     |

**Table S38.** Conformational analysis for **6**.

| Conformer # | E           | G           | DE       | DG       |
|-------------|-------------|-------------|----------|----------|
|             | au          | au          | kcal/mol | kcal/mol |
| 1           | -969.747643 | -969.311119 | 0.4      | 0.4      |
| 2           | -969.748115 | -969.311749 | 0.1      | 0.0      |
| 3           | -969.748074 | -969.311139 | 0.2      | 0.4      |
| 4           | -969.747219 | -969.310609 | 0.7      | 0.7      |
| 5           | -969.747002 | -969.310271 | 0.8      | 0.9      |
| 6           | -969.747237 | -969.309971 | 0.7      | 1.1      |
| 7           | -969.746590 | -969.309780 | 1.1      | 1.2      |
| 8           | -969.747172 | -969.310703 | 0.7      | 0.7      |
| 9           | -969.748334 | -969.310634 | 0.0      | 0.7      |
| 10          | -969.747523 | -969.310702 | 0.5      | 0.7      |
| 11          | -969.746188 | -969.309053 | 1.3      | 1.7      |
| 12          | -969.747264 | -969.309676 | 0.7      | 1.3      |
| 13          | -969.746077 | -969.309264 | 1.4      | 1.6      |
| 14          | -969.745974 | -969.308991 | 1.5      | 1.7      |
| 15          | -969.746464 | -969.308857 | 1.2      | 1.8      |
| 16          | -969.747075 | -969.309921 | 0.8      | 1.1      |
| 17          | -969.746159 | -969.309822 | 1.4      | 1.2      |
| 18          | -969.745545 | -969.308591 | 1.7      | 2.0      |
| 19          | -969.745439 | -969.308130 | 1.8      | 2.3      |
| 20          | -969.745283 | -969.308708 | 1.9      | 1.9      |
| 21          | -969.745568 | -969.309427 | 1.7      | 1.5      |
| Avg.        | -969.747510 | -969.310722 |          |          |

**Table S39.** Conformational analysis for **3f<sup>‡</sup>**.

| Conformer # | E            | G            | DE       | DG       |
|-------------|--------------|--------------|----------|----------|
|             | au           | au           | kcal/mol | kcal/mol |
| 1           | -1009.452222 | -1008.977090 | 0.2      | 1.4      |
| 2           | -1009.452238 | -1008.976750 | 0.1      | 1.6      |
| 3           | -1009.451004 | -1008.976976 | 0.9      | 1.4      |
| 4           | -1009.451343 | -1008.976320 | 0.7      | 1.9      |
| 5           | -1009.450590 | -1008.975591 | 1.2      | 2.3      |
| 6           | -1009.450179 | -1008.975325 | 1.4      | 2.5      |
| 7           | -1009.451774 | -1008.978942 | 0.4      | 0.2      |

|      |              |              |     |     |
|------|--------------|--------------|-----|-----|
| 8    | -1009.449292 | -1008.975307 | 2.0 | 2.5 |
| 9    | -1009.450700 | -1008.976364 | 1.1 | 1.8 |
| 10   | -1009.450406 | -1008.976435 | 1.3 | 1.8 |
| 11   | -1009.449979 | -1008.975732 | 1.6 | 2.2 |
| 12   | -1009.452462 | -1008.979188 | 0.0 | 0.1 |
| 13   | -1009.449815 | -1008.975852 | 1.7 | 2.1 |
| 14   | -1009.449779 | -1008.975285 | 1.7 | 2.5 |
| 15   | -1009.450463 | -1008.975681 | 1.3 | 2.3 |
| 16   | -1009.449873 | -1008.975060 | 1.6 | 2.6 |
| 17   | -1009.450102 | -1008.974734 | 1.5 | 2.8 |
| 18   | -1009.452247 | -1008.978635 | 0.1 | 0.4 |
| 19   | -1009.451697 | -1008.979275 | 0.5 | 0.0 |
| 20   | -1009.449769 | -1008.974882 | 1.7 | 2.8 |
| 21   | -1009.450444 | -1008.977599 | 1.3 | 1.1 |
| 22   | -1009.450887 | -1008.978303 | 1.0 | 0.6 |
| 23   | -1009.449755 | -1008.974950 | 1.7 | 2.7 |
| 24   | -1009.451138 | -1008.978406 | 0.8 | 0.5 |
| 25   | -1009.449740 | -1008.975078 | 1.7 | 2.6 |
| 26   | -1009.451249 | -1008.978078 | 0.8 | 0.8 |
| 27   | -1009.450647 | -1008.978056 | 1.1 | 0.8 |
| 28   | -1009.449602 | -1008.974001 | 1.8 | 3.3 |
| 29   | -1009.449949 | -1008.974312 | 1.6 | 3.1 |
| 30   | -1009.449605 | -1008.977691 | 1.8 | 1.0 |
| 31   | -1009.451307 | -1008.978414 | 0.7 | 0.5 |
| 32   | -1009.449613 | -1008.974887 | 1.8 | 2.8 |
| 33   | -1009.450233 | -1008.977756 | 1.4 | 1.0 |
| 34   | -1009.450534 | -1008.978043 | 1.2 | 0.8 |
| 35   | -1009.449631 | -1008.977872 | 1.8 | 0.9 |
| 36   | -1009.450451 | -1008.978004 | 1.3 | 0.8 |
| 37   | -1009.450481 | -1008.976953 | 1.2 | 1.5 |
| 38   | -1009.450120 | -1008.976601 | 1.5 | 1.7 |
| 39   | -1009.450180 | -1008.977312 | 1.4 | 1.2 |
| Avg. | -1009.451434 | -1008.978332 |     |     |

**Table S40.** Conformational analysis for **3f**.

| Conformer # | E            | G            | DE       | DG       |
|-------------|--------------|--------------|----------|----------|
|             | au           | au           | kcal/mol | kcal/mol |
| 1           | -1009.045872 | -1008.583862 | 0.0      | 0.0      |
| 2           | -1009.045881 | -1008.583905 | 0.0      | 0.0      |
| 3           | -1009.045830 | -1008.583706 | 0.0      | 0.1      |
| 4           | -1009.045381 | -1008.582880 | 0.3      | 0.6      |
| 5           | -1009.045723 | -1008.583727 | 0.1      | 0.1      |
| 6           | -1009.045720 | -1008.583725 | 0.1      | 0.1      |
| 7           | -1009.045350 | -1008.583764 | 0.3      | 0.1      |
| 8           | -1009.044896 | -1008.582752 | 0.6      | 0.7      |

|    |              |              |     |     |
|----|--------------|--------------|-----|-----|
| 9  | -1009.045327 | -1008.583627 | 0.3 | 0.2 |
| 10 | -1009.045551 | -1008.582520 | 0.2 | 0.9 |
| 11 | -1009.045550 | -1008.582526 | 0.2 | 0.9 |
| 12 | -1009.045353 | -1008.583788 | 0.3 | 0.1 |
| 13 | -1009.044961 | -1008.582031 | 0.6 | 1.2 |
| 14 | -1009.044222 | -1008.581441 | 1.0 | 1.5 |
| 15 | -1009.045534 | -1008.582554 | 0.2 | 0.8 |
| 16 | -1009.045536 | -1008.582553 | 0.2 | 0.8 |
| 17 | -1009.045542 | -1008.582562 | 0.2 | 0.8 |
| 18 | -1009.044609 | -1008.583184 | 0.8 | 0.5 |
| 19 | -1009.044876 | -1008.582336 | 0.6 | 1.0 |
| 20 | -1009.044891 | -1008.582363 | 0.6 | 1.0 |
| 21 | -1009.045344 | -1008.582857 | 0.3 | 0.7 |
| 22 | -1009.044464 | -1008.581962 | 0.9 | 1.2 |
| 23 | -1009.044229 | -1008.581430 | 1.0 | 1.6 |
| 24 | -1009.044276 | -1008.581833 | 1.0 | 1.3 |
| 25 | -1009.044474 | -1008.582442 | 0.9 | 0.9 |
| 26 | -1009.044374 | -1008.582951 | 0.9 | 0.6 |
| 27 | -1009.044381 | -1008.582316 | 0.9 | 1.0 |
| 28 | -1009.043528 | -1008.579824 | 1.5 | 2.6 |
| 29 | -1009.044451 | -1008.582538 | 0.9 | 0.9 |
| 30 | -1009.044373 | -1008.582242 | 0.9 | 1.0 |
| 31 | -1009.043650 | -1008.580409 | 1.4 | 2.2 |
| 32 | -1009.043375 | -1008.580489 | 1.6 | 2.1 |
| 33 | -1009.043375 | -1008.580492 | 1.6 | 2.1 |
| 34 | -1009.044386 | -1008.582213 | 0.9 | 1.1 |
| 35 | -1009.043228 | -1008.580297 | 1.7 | 2.3 |
| 36 | -1009.044547 | -1008.581217 | 0.8 | 1.7 |
| 37 | -1009.044546 | -1008.581351 | 0.8 | 1.6 |
| 38 | -1009.043322 | -1008.580557 | 1.6 | 2.1 |
| 39 | -1009.043222 | -1008.580230 | 1.7 | 2.3 |
| 40 | -1009.044762 | -1008.581570 | 0.7 | 1.5 |
| 41 | -1009.044263 | -1008.580662 | 1.0 | 2.0 |
| 42 | -1009.044252 | -1008.580976 | 1.0 | 1.8 |
| 43 | -1009.044613 | -1008.582419 | 0.8 | 0.9 |
| 44 | -1009.044625 | -1008.581168 | 0.8 | 1.7 |
| 45 | -1009.044089 | -1008.581647 | 1.1 | 1.4 |
| 46 | -1009.044239 | -1008.580590 | 1.0 | 2.1 |
| 47 | -1009.044090 | -1008.581223 | 1.1 | 1.7 |
| 48 | -1009.044276 | -1008.580659 | 1.0 | 2.0 |
| 49 | -1009.044223 | -1008.581601 | 1.0 | 1.4 |
| 50 | -1009.044197 | -1008.581718 | 1.1 | 1.4 |
| 51 | -1009.044212 | -1008.581377 | 1.0 | 1.6 |
| 52 | -1009.044192 | -1008.581113 | 1.1 | 1.8 |
| 53 | -1009.045470 | -1008.583582 | 0.3 | 0.2 |

|      |              |              |     |     |
|------|--------------|--------------|-----|-----|
| 54   | -1009.045346 | -1008.583621 | 0.3 | 0.2 |
| Avg. | -1009.045155 | -1008.583145 |     |     |

**Table S41.** Conformational analysis for **6f<sup>‡</sup>**.

| Conformer # | E            | G            | DE       | DG       |
|-------------|--------------|--------------|----------|----------|
|             | au           | au           | kcal/mol | kcal/mol |
| 1           | -1009.450306 | -1008.976013 | 0.4      | 1.8      |
| 2           | -1009.450386 | -1008.976595 | 0.3      | 1.4      |
| 3           | -1009.449968 | -1008.975535 | 0.6      | 2.1      |
| 4           | -1009.450923 | -1008.978470 | 0.0      | 0.2      |
| 5           | -1009.450838 | -1008.978807 | 0.1      | 0.0      |
| 6           | -1009.447769 | -1008.975444 | 2.0      | 2.1      |
| 7           | -1009.450740 | -1008.977980 | 0.1      | 0.5      |
| 8           | -1009.449741 | -1008.974852 | 0.7      | 2.5      |
| 9           | -1009.447901 | -1008.975990 | 1.9      | 1.8      |
| 10          | -1009.449584 | -1008.974724 | 0.8      | 2.6      |
| 11          | -1009.449606 | -1008.977332 | 0.8      | 0.9      |
| 12          | -1009.449406 | -1008.974720 | 1.0      | 2.6      |
| 13          | -1009.450480 | -1008.977701 | 0.3      | 0.7      |
| 14          | -1009.450533 | -1008.977242 | 0.2      | 1.0      |
| 15          | -1009.449590 | -1008.975574 | 0.8      | 2.0      |
| 16          | -1009.449167 | -1008.974506 | 1.1      | 2.7      |
| 17          | -1009.449939 | -1008.977388 | 0.6      | 0.9      |
| 18          | -1009.447828 | -1008.975992 | 1.9      | 1.8      |
| 19          | -1009.449415 | -1008.975112 | 0.9      | 2.3      |
| 20          | -1009.449775 | -1008.977374 | 0.7      | 0.9      |
| 21          | -1009.450284 | -1008.978139 | 0.4      | 0.4      |
| 22          | -1009.450127 | -1008.978222 | 0.5      | 0.4      |
| 23          | -1009.448781 | -1008.974082 | 1.3      | 3.0      |
| 24          | -1009.448939 | -1008.976259 | 1.2      | 1.6      |
| 25          | -1009.448367 | -1008.973459 | 1.6      | 3.4      |
| 26          | -1009.448710 | -1008.974180 | 1.4      | 2.9      |
| 27          | -1009.449189 | -1008.977266 | 1.1      | 1.0      |
| 28          | -1009.448459 | -1008.974353 | 1.5      | 2.8      |
| 29          | -1009.447928 | -1008.976297 | 1.9      | 1.6      |
| 30          | -1009.448584 | -1008.975265 | 1.5      | 2.2      |
| 31          | -1009.449484 | -1008.974313 | 0.9      | 2.8      |
| 32          | -1009.449595 | -1008.974449 | 0.8      | 2.7      |
| 33          | -1009.448471 | -1008.973126 | 1.5      | 3.6      |
| 34          | -1009.450047 | -1008.976560 | 0.5      | 1.4      |
| 35          | -1009.449894 | -1008.977217 | 0.6      | 1.0      |
| 36          | -1009.450031 | -1008.977092 | 0.6      | 1.1      |
| 37          | -1009.449479 | -1008.977020 | 0.9      | 1.1      |
| 38          | -1009.449442 | -1008.976219 | 0.9      | 1.6      |
| 39          | -1009.448536 | -1008.974845 | 1.5      | 2.5      |

|      |              |              |     |     |
|------|--------------|--------------|-----|-----|
| 40   | -1009.448511 | -1008.974794 | 1.5 | 2.5 |
| 41   | -1009.447780 | -1008.972305 | 2.0 | 4.1 |
| 42   | -1009.450317 | -1008.977981 | 0.4 | 0.5 |
| 43   | -1009.448574 | -1008.975286 | 1.5 | 2.2 |
| 44   | -1009.449287 | -1008.978004 | 1.0 | 0.5 |
| 45   | -1009.448560 | -1008.975199 | 1.5 | 2.3 |
| 46   | -1009.449533 | -1008.975642 | 0.9 | 2.0 |
| 47   | -1009.449290 | -1008.975567 | 1.0 | 2.0 |
| 48   | -1009.448834 | -1008.975247 | 1.3 | 2.2 |
| 49   | -1009.449546 | -1008.975690 | 0.9 | 2.0 |
| 50   | -1009.449000 | -1008.975786 | 1.2 | 1.9 |
| 51   | -1009.448426 | -1008.975230 | 1.6 | 2.2 |
| 52   | -1009.448852 | -1008.976584 | 1.3 | 1.4 |
| 53   | -1009.449498 | -1008.976963 | 0.9 | 1.2 |
| 54   | -1009.448672 | -1008.974995 | 1.4 | 2.4 |
| 55   | -1009.448646 | -1008.975479 | 1.4 | 2.1 |
| 56   | -1009.449477 | -1008.977079 | 0.9 | 1.1 |
| 57   | -1009.447931 | -1008.974369 | 1.9 | 2.8 |
| 58   | -1009.448241 | -1008.974761 | 1.7 | 2.5 |
| 59   | -1009.448958 | -1008.974797 | 1.2 | 2.5 |
| 60   | -1009.449294 | -1008.976751 | 1.0 | 1.3 |
| 61   | -1009.449481 | -1008.976952 | 0.9 | 1.2 |
| 62   | -1009.449401 | -1008.976681 | 1.0 | 1.3 |
| 63   | -1009.449498 | -1008.975419 | 0.9 | 2.1 |
| 64   | -1009.448879 | -1008.974406 | 1.3 | 2.8 |
| 65   | -1009.448464 | -1008.976074 | 1.5 | 1.7 |
| 66   | -1009.448580 | -1008.974295 | 1.5 | 2.8 |
| 67   | -1009.448599 | -1008.976691 | 1.5 | 1.3 |
| Avg. | -1009.449865 | -1008.977530 |     |     |

**Table S42.** Conformational analysis for **6f**.

| Conformer # | E            | G            | DE       | DG       |
|-------------|--------------|--------------|----------|----------|
|             | au           | au           | kcal/mol | kcal/mol |
| 1           | -1009.043661 | -1008.580852 | 0.0      | 0.0      |
| 2           | -1009.040614 | -1008.577587 | 1.9      | 2.0      |
| 3           | -1009.043468 | -1008.580364 | 0.1      | 0.3      |
| 4           | -1009.042842 | -1008.579528 | 0.5      | 0.8      |
| 5           | -1009.040522 | -1008.576776 | 2.0      | 2.6      |
| Avg.        | -1009.043343 | -1008.580442 |          |          |

**Table S43.** Conformational analysis for **3bc<sup>±</sup>**.

| Conformer # | E            | G            | DE       | DG       |
|-------------|--------------|--------------|----------|----------|
|             | au           | au           | kcal/mol | kcal/mol |
| 1           | -1009.448213 | -1008.974824 | 1.0      | 1.9      |
| 2           | -1009.447915 | -1008.975930 | 1.2      | 1.2      |
| 3           | -1009.448222 | -1008.975080 | 1.0      | 1.7      |
| 4           | -1009.449846 | -1008.977784 | 0.0      | 0.0      |
| 5           | -1009.447780 | -1008.975279 | 1.3      | 1.6      |
| 6           | -1009.449454 | -1008.977840 | 0.2      | 0.0      |
| 7           | -1009.448121 | -1008.974372 | 1.1      | 2.2      |
| 8           | -1009.449247 | -1008.977039 | 0.4      | 0.5      |
| 9           | -1009.448969 | -1008.976453 | 0.6      | 0.9      |
| 10          | -1009.448883 | -1008.975824 | 0.6      | 1.3      |
| 11          | -1009.448983 | -1008.977720 | 0.5      | 0.1      |
| 12          | -1009.448973 | -1008.977592 | 0.5      | 0.2      |
| 13          | -1009.448849 | -1008.976695 | 0.6      | 0.7      |
| 14          | -1009.448789 | -1008.977206 | 0.7      | 0.4      |
| 15          | -1009.448983 | -1008.976214 | 0.5      | 1.0      |
| 16          | -1009.448546 | -1008.976568 | 0.8      | 0.8      |
| 17          | -1009.448562 | -1008.976322 | 0.8      | 1.0      |
| 18          | -1009.448541 | -1008.976498 | 0.8      | 0.8      |
| 19          | -1009.448885 | -1008.976075 | 0.6      | 1.1      |
| 20          | -1009.448321 | -1008.976465 | 1.0      | 0.9      |
| 21          | -1009.448108 | -1008.976642 | 1.1      | 0.8      |
| 22          | -1009.449000 | -1008.976384 | 0.5      | 0.9      |
| 23          | -1009.448138 | -1008.976404 | 1.1      | 0.9      |
| 24          | -1009.448096 | -1008.976950 | 1.1      | 0.6      |
| 25          | -1009.448023 | -1008.976288 | 1.1      | 1.0      |
| 26          | -1009.448129 | -1008.976577 | 1.1      | 0.8      |
| 27          | -1009.448008 | -1008.976629 | 1.2      | 0.8      |
| 28          | -1009.448012 | -1008.976655 | 1.2      | 0.7      |
| 29          | -1009.447958 | -1008.976396 | 1.2      | 0.9      |
| 30          | -1009.447889 | -1008.976829 | 1.2      | 0.6      |
| 31          | -1009.448130 | -1008.975886 | 1.1      | 1.2      |
| 32          | -1009.447545 | -1008.975534 | 1.4      | 1.4      |
| 33          | -1009.447999 | -1008.975580 | 1.2      | 1.4      |
| 34          | -1009.447596 | -1008.974823 | 1.4      | 1.9      |
| 35          | -1009.447503 | -1008.975301 | 1.5      | 1.6      |
| 36          | -1009.448219 | -1008.975121 | 1.0      | 1.7      |
| 37          | -1009.447491 | -1008.975160 | 1.5      | 1.7      |
| 38          | -1009.448144 | -1008.973834 | 1.1      | 2.5      |
| 39          | -1009.448125 | -1008.976041 | 1.1      | 1.1      |
| 40          | -1009.448204 | -1008.975800 | 1.0      | 1.3      |
| 41          | -1009.447750 | -1008.975831 | 1.3      | 1.3      |
| 42          | -1009.447733 | -1008.975632 | 1.3      | 1.4      |

|      |              |              |     |     |
|------|--------------|--------------|-----|-----|
| 43   | -1009.448156 | -1008.975243 | 1.1 | 1.6 |
| 44   | -1009.447668 | -1008.974810 | 1.4 | 1.9 |
| 45   | -1009.448303 | -1008.975629 | 1.0 | 1.4 |
| 46   | -1009.448015 | -1008.976004 | 1.1 | 1.2 |
| 47   | -1009.447492 | -1008.974834 | 1.5 | 1.9 |
| 48   | -1009.447513 | -1008.974764 | 1.5 | 1.9 |
| 49   | -1009.447461 | -1008.974154 | 1.5 | 2.3 |
| 50   | -1009.448214 | -1008.976249 | 1.0 | 1.0 |
| 51   | -1009.447911 | -1008.974818 | 1.2 | 1.9 |
| 52   | -1009.448233 | -1008.975988 | 1.0 | 1.2 |
| 53   | -1009.448290 | -1008.976306 | 1.0 | 1.0 |
| 54   | -1009.447956 | -1008.974908 | 1.2 | 1.8 |
| 55   | -1009.448481 | -1008.974653 | 0.9 | 2.0 |
| 56   | -1009.448071 | -1008.973272 | 1.1 | 2.9 |
| 57   | -1009.447470 | -1008.975222 | 1.5 | 1.6 |
| 58   | -1009.448235 | -1008.976636 | 1.0 | 0.8 |
| 59   | -1009.447502 | -1008.975383 | 1.5 | 1.5 |
| 60   | -1009.448706 | -1008.976266 | 0.7 | 1.0 |
| 61   | -1009.449504 | -1008.975367 | 0.2 | 1.6 |
| 62   | -1009.448290 | -1008.974546 | 1.0 | 2.1 |
| 63   | -1009.448255 | -1008.975178 | 1.0 | 1.7 |
| 64   | -1009.448369 | -1008.975074 | 0.9 | 1.7 |
| Avg. | -1009.448616 | -1008.976711 |     |     |

**Table S44.** Conformational analysis for **3bc**.

| Conformer # | E            | G            | DE       | DG       |
|-------------|--------------|--------------|----------|----------|
|             | au           | au           | kcal/mol | kcal/mol |
| 1           | -1009.049017 | -1008.585263 | 0.0      | 0.4      |
| 2           | -1009.048066 | -1008.583191 | 0.6      | 1.7      |
| 3           | -1009.048932 | -1008.584622 | 0.1      | 0.8      |
| 4           | -1009.047878 | -1008.583132 | 0.7      | 1.7      |
| 5           | -1009.047300 | -1008.582937 | 1.1      | 1.8      |
| 6           | -1009.048728 | -1008.584834 | 0.2      | 0.6      |
| 7           | -1009.046764 | -1008.582075 | 1.4      | 2.4      |
| 8           | -1009.048683 | -1008.584993 | 0.2      | 0.5      |
| 9           | -1009.048033 | -1008.585800 | 0.6      | 0.0      |
| 10          | -1009.048059 | -1008.585862 | 0.6      | 0.0      |
| 11          | -1009.046991 | -1008.583607 | 1.3      | 1.4      |
| 12          | -1009.047469 | -1008.583425 | 1.0      | 1.5      |
| 13          | -1009.046381 | -1008.581592 | 1.7      | 2.7      |
| 14          | -1009.047207 | -1008.584251 | 1.1      | 1.0      |
| 15          | -1009.046357 | -1008.583055 | 1.7      | 1.8      |
| 16          | -1009.047314 | -1008.584606 | 1.1      | 0.8      |
| 17          | -1009.047619 | -1008.583804 | 0.9      | 1.3      |
| 18          | -1009.047121 | -1008.584548 | 1.2      | 0.8      |



|    |              |              |     |     |
|----|--------------|--------------|-----|-----|
| 19 | -1009.047283 | -1008.584759 | 1.1 | 0.7 |
| 20 | -1009.047237 | -1008.584466 | 1.1 | 0.9 |
| 21 | -1009.047144 | -1008.584721 | 1.2 | 0.7 |
| 22 | -1009.047289 | -1008.584881 | 1.1 | 0.6 |
| 23 | -1009.047065 | -1008.584711 | 1.2 | 0.7 |
| 24 | -1009.047253 | -1008.585090 | 1.1 | 0.5 |
| 25 | -1009.047212 | -1008.584512 | 1.1 | 0.8 |
| 26 | -1009.047310 | -1008.584748 | 1.1 | 0.7 |
| 27 | -1009.047130 | -1008.584659 | 1.2 | 0.8 |
| 28 | -1009.047136 | -1008.584720 | 1.2 | 0.7 |
| 29 | -1009.047171 | -1008.584979 | 1.2 | 0.6 |
| 30 | -1009.047114 | -1008.584550 | 1.2 | 0.8 |
| 31 | -1009.047298 | -1008.584692 | 1.1 | 0.7 |
| 32 | -1009.045947 | -1008.582615 | 1.9 | 2.0 |
| 33 | -1009.047664 | -1008.583614 | 0.8 | 1.4 |
| 34 | -1009.047324 | -1008.583021 | 1.1 | 1.8 |
| 35 | -1009.047081 | -1008.584646 | 1.2 | 0.8 |
| 36 | -1009.047165 | -1008.584474 | 1.2 | 0.9 |
| 37 | -1009.047602 | -1008.583553 | 0.9 | 1.4 |
| 38 | -1009.047123 | -1008.584603 | 1.2 | 0.8 |
| 39 | -1009.047081 | -1008.584631 | 1.2 | 0.8 |
| 40 | -1009.047515 | -1008.584097 | 0.9 | 1.1 |
| 41 | -1009.047595 | -1008.584514 | 0.9 | 0.8 |
| 42 | -1009.047660 | -1008.584404 | 0.9 | 0.9 |
| 43 | -1009.045982 | -1008.582984 | 1.9 | 1.8 |
| 44 | -1009.046409 | -1008.583191 | 1.6 | 1.7 |
| 45 | -1009.047576 | -1008.583652 | 0.9 | 1.4 |
| 46 | -1009.045872 | -1008.582935 | 2.0 | 1.8 |
| 47 | -1009.046014 | -1008.581853 | 1.9 | 2.5 |
| 48 | -1009.047503 | -1008.584308 | 0.9 | 1.0 |
| 49 | -1009.046068 | -1008.582863 | 1.9 | 1.9 |
| 50 | -1009.047097 | -1008.583499 | 1.2 | 1.5 |
| 51 | -1009.046359 | -1008.583106 | 1.7 | 1.7 |
| 52 | -1009.047028 | -1008.583746 | 1.2 | 1.3 |
| 53 | -1009.046332 | -1008.583605 | 1.7 | 1.4 |
| 54 | -1009.046374 | -1008.583387 | 1.7 | 1.6 |
| 55 | -1009.046314 | -1008.583342 | 1.7 | 1.6 |
| 56 | -1009.046702 | -1008.584081 | 1.5 | 1.1 |
| 57 | -1009.046796 | -1008.584108 | 1.4 | 1.1 |
| 58 | -1009.046854 | -1008.584361 | 1.4 | 0.9 |
| 59 | -1009.045973 | -1008.583182 | 1.9 | 1.7 |
| 60 | -1009.047589 | -1008.583039 | 0.9 | 1.8 |
| 61 | -1009.046131 | -1008.583337 | 1.8 | 1.6 |
| 62 | -1009.045950 | -1008.583310 | 1.9 | 1.6 |
| 63 | -1009.046008 | -1008.583201 | 1.9 | 1.7 |

|      |              |              |     |     |
|------|--------------|--------------|-----|-----|
| 64   | -1009.046844 | -1008.583486 | 1.4 | 1.5 |
| 65   | -1009.046101 | -1008.583872 | 1.8 | 1.2 |
| 66   | -1009.046103 | -1008.583494 | 1.8 | 1.5 |
| Avg. | -1009.047740 | -1008.584639 |     |     |

**Table S45.** Conformational analysis for **6bc<sup>±</sup>**.

| Conformer # | E            | G            | DE       | DG       |
|-------------|--------------|--------------|----------|----------|
|             | au           | au           | kcal/mol | kcal/mol |
| 1           | -1009.448830 | -1008.975497 | 0.0      | 0.7      |
| 2           | -1009.447955 | -1008.974668 | 0.6      | 1.2      |
| 3           | -1009.448392 | -1008.976603 | 0.3      | 0.0      |
| 4           | -1009.448576 | -1008.975116 | 0.2      | 0.9      |
| 5           | -1009.447665 | -1008.975897 | 0.8      | 0.4      |
| 6           | -1009.447703 | -1008.975859 | 0.7      | 0.5      |
| 7           | -1009.446680 | -1008.972730 | 1.4      | 2.4      |
| 8           | -1009.448231 | -1008.975484 | 0.4      | 0.7      |
| 9           | -1009.447615 | -1008.975559 | 0.8      | 0.7      |
| 10          | -1009.447114 | -1008.974035 | 1.1      | 1.6      |
| 11          | -1009.447033 | -1008.974269 | 1.1      | 1.5      |
| 12          | -1009.447595 | -1008.975495 | 0.8      | 0.7      |
| 13          | -1009.447666 | -1008.975158 | 0.8      | 0.9      |
| 14          | -1009.447521 | -1008.974990 | 0.8      | 1.0      |
| 15          | -1009.447510 | -1008.973320 | 0.8      | 2.1      |
| 16          | -1009.447540 | -1008.975162 | 0.8      | 0.9      |
| 17          | -1009.446696 | -1008.973796 | 1.4      | 1.8      |
| 18          | -1009.446480 | -1008.972799 | 1.5      | 2.4      |
| 19          | -1009.447992 | -1008.974092 | 0.5      | 1.6      |
| 20          | -1009.447748 | -1008.974805 | 0.7      | 1.1      |
| 21          | -1009.446775 | -1008.975007 | 1.3      | 1.0      |
| 22          | -1009.447350 | -1008.974451 | 0.9      | 1.4      |
| 23          | -1009.447676 | -1008.975144 | 0.7      | 0.9      |
| 24          | -1009.447202 | -1008.974360 | 1.0      | 1.4      |
| 25          | -1009.447235 | -1008.974942 | 1.0      | 1.0      |
| 26          | -1009.446687 | -1008.974212 | 1.4      | 1.5      |
| 27          | -1009.446469 | -1008.972024 | 1.5      | 2.9      |
| 28          | -1009.446639 | -1008.973958 | 1.4      | 1.7      |
| 29          | -1009.447019 | -1008.973255 | 1.2      | 2.1      |
| 30          | -1009.447451 | -1008.974293 | 0.9      | 1.4      |
| 31          | -1009.447202 | -1008.974223 | 1.0      | 1.5      |
| 32          | -1009.446528 | -1008.974460 | 1.5      | 1.3      |
| 33          | -1009.447331 | -1008.973492 | 1.0      | 2.0      |
| 34          | -1009.446592 | -1008.973797 | 1.4      | 1.8      |
| 35          | -1009.446935 | -1008.973381 | 1.2      | 2.0      |
| 36          | -1009.446472 | -1008.973702 | 1.5      | 1.8      |
| 37          | -1009.446553 | -1008.973022 | 1.4      | 2.2      |

|      |              |              |     |     |
|------|--------------|--------------|-----|-----|
| 38   | -1009.447083 | -1008.974167 | 1.1 | 1.5 |
| 39   | -1009.446684 | -1008.973451 | 1.4 | 2.0 |
| 40   | -1009.446705 | -1008.973315 | 1.4 | 2.1 |
| 41   | -1009.447618 | -1008.974918 | 0.8 | 1.1 |
| 42   | -1009.447543 | -1008.975417 | 0.8 | 0.7 |
| 43   | -1009.448863 | -1008.975348 | 0.0 | 0.8 |
| Avg. | -1009.447822 | -1008.975288 |     |     |

**Table S46.** Conformational analysis for **6bc**.

| Conformer # | E            | G            | DE       | DG       |
|-------------|--------------|--------------|----------|----------|
|             | au           | au           | kcal/mol | kcal/mol |
| 1           | -1009.037584 | -1008.573797 | 0.0      | 0.0      |
| 2           | -1009.036967 | -1008.573869 | 0.4      | 0.0      |
| 3           | -1009.037330 | -1008.573063 | 0.2      | 0.5      |
| 4           | -1009.036702 | -1008.573081 | 0.6      | 0.5      |
| 5           | -1009.036929 | -1008.573118 | 0.4      | 0.5      |
| 6           | -1009.036751 | -1008.572933 | 0.5      | 0.6      |
| 7           | -1009.036758 | -1008.572594 | 0.5      | 0.8      |
| 8           | -1009.036650 | -1008.573631 | 0.6      | 0.1      |
| 9           | -1009.036971 | -1008.572810 | 0.4      | 0.7      |
| 10          | -1009.036896 | -1008.572746 | 0.4      | 0.7      |
| 11          | -1009.036761 | -1008.572599 | 0.5      | 0.8      |
| 12          | -1009.036186 | -1008.572464 | 0.9      | 0.9      |
| 13          | -1009.036229 | -1008.572917 | 0.8      | 0.6      |
| 14          | -1009.036520 | -1008.571868 | 0.7      | 1.3      |
| 15          | -1009.037578 | -1008.573800 | 0.0      | 0.0      |
| 16          | -1009.035519 | -1008.569835 | 1.3      | 2.5      |
| 17          | -1009.037196 | -1008.572953 | 0.2      | 0.6      |
| 18          | -1009.036846 | -1008.572458 | 0.5      | 0.9      |
| 19          | -1009.036933 | -1008.571417 | 0.4      | 1.5      |
| 20          | -1009.036578 | -1008.571717 | 0.6      | 1.4      |
| 21          | -1009.035875 | -1008.571583 | 1.1      | 1.4      |
| 22          | -1009.036740 | -1008.573065 | 0.5      | 0.5      |
| 23          | -1009.037022 | -1008.573035 | 0.4      | 0.5      |
| 24          | -1009.036836 | -1008.572705 | 0.5      | 0.7      |
| 25          | -1009.035595 | -1008.571736 | 1.2      | 1.3      |
| 26          | -1009.035899 | -1008.571370 | 1.1      | 1.6      |
| 27          | -1009.035705 | -1008.571329 | 1.2      | 1.6      |
| 28          | -1009.035361 | -1008.571705 | 1.4      | 1.4      |
| 29          | -1009.035604 | -1008.571301 | 1.2      | 1.6      |
| 30          | -1009.035989 | -1008.571372 | 1.0      | 1.6      |
| 31          | -1009.035877 | -1008.570932 | 1.1      | 1.8      |
| 32          | -1009.035901 | -1008.571365 | 1.1      | 1.6      |
| 33          | -1009.034619 | -1008.570641 | 1.9      | 2.0      |
| 34          | -1009.035346 | -1008.571530 | 1.4      | 1.5      |

|      |              |              |     |     |
|------|--------------|--------------|-----|-----|
| 35   | -1009.034800 | -1008.571283 | 1.7 | 1.6 |
| 36   | -1009.036001 | -1008.570386 | 1.0 | 2.2 |
| 37   | -1009.036606 | -1008.571892 | 0.6 | 1.2 |
| 38   | -1009.035216 | -1008.570671 | 1.5 | 2.0 |
| 39   | -1009.034633 | -1008.570963 | 1.9 | 1.8 |
| 40   | -1009.035550 | -1008.571373 | 1.3 | 1.6 |
| 41   | -1009.035083 | -1008.571094 | 1.6 | 1.7 |
| 42   | -1009.035627 | -1008.571371 | 1.2 | 1.6 |
| 43   | -1009.036769 | -1008.572611 | 0.5 | 0.8 |
| 44   | -1009.034918 | -1008.569300 | 1.7 | 2.9 |
| 45   | -1009.034490 | -1008.569376 | 1.9 | 2.8 |
| 46   | -1009.036329 | -1008.571005 | 0.8 | 1.8 |
| Avg. | -1009.036739 | -1008.572953 |     |     |

**Table S47.** Conformational analysis for **3bd<sup>‡</sup>**.

| Conformer # | E            | G            | DE       | DG       |
|-------------|--------------|--------------|----------|----------|
|             | au           | au           | kcal/mol | kcal/mol |
| 1           | -1048.748907 | -1048.249156 | 2.1      | 2.7      |
| 2           | -1048.750138 | -1048.250446 | 1.3      | 1.9      |
| 3           | -1048.750178 | -1048.250245 | 1.3      | 2.0      |
| 4           | -1048.752115 | -1048.253509 | 0.1      | 0.0      |
| 5           | -1048.751834 | -1048.252657 | 0.2      | 0.5      |
| 6           | -1048.750313 | -1048.251744 | 1.2      | 1.1      |
| 7           | -1048.752217 | -1048.253216 | 0.0      | 0.2      |
| 8           | -1048.752083 | -1048.252062 | 0.1      | 0.9      |
| 9           | -1048.751613 | -1048.252386 | 0.4      | 0.7      |
| 10          | -1048.751096 | -1048.250818 | 0.7      | 1.7      |
| 11          | -1048.751382 | -1048.251124 | 0.5      | 1.5      |
| 12          | -1048.750911 | -1048.251778 | 0.8      | 1.1      |
| 13          | -1048.751004 | -1048.251904 | 0.8      | 1.0      |
| 14          | -1048.749313 | -1048.251645 | 1.8      | 1.2      |
| 15          | -1048.749704 | -1048.250760 | 1.6      | 1.7      |
| 16          | -1048.749234 | -1048.251600 | 1.9      | 1.2      |
| 17          | -1048.749103 | -1048.249532 | 2.0      | 2.5      |
| 18          | -1048.749293 | -1048.251322 | 1.8      | 1.4      |
| 19          | -1048.750560 | -1048.251463 | 1.0      | 1.3      |
| 20          | -1048.749661 | -1048.250065 | 1.6      | 2.2      |
| 21          | -1048.749098 | -1048.249647 | 2.0      | 2.4      |
| 22          | -1048.751210 | -1048.251837 | 0.6      | 1.0      |
| 23          | -1048.750451 | -1048.249334 | 1.1      | 2.6      |
| 24          | -1048.750944 | -1048.251399 | 0.8      | 1.3      |
| 25          | -1048.751323 | -1048.251741 | 0.6      | 1.1      |
| 26          | -1048.750919 | -1048.252300 | 0.8      | 0.8      |
| 27          | -1048.750778 | -1048.253133 | 0.9      | 0.2      |
| 28          | -1048.750849 | -1048.253078 | 0.9      | 0.3      |

|    |              |              |     |     |
|----|--------------|--------------|-----|-----|
| 29 | -1048.749214 | -1048.249924 | 1.9 | 2.2 |
| 30 | -1048.750600 | -1048.251281 | 1.0 | 1.4 |
| 31 | -1048.750564 | -1048.251470 | 1.0 | 1.3 |
| 32 | -1048.750551 | -1048.250963 | 1.0 | 1.6 |
| 33 | -1048.750020 | -1048.250463 | 1.4 | 1.9 |
| 34 | -1048.750533 | -1048.250002 | 1.1 | 2.2 |
| 35 | -1048.750237 | -1048.250294 | 1.2 | 2.0 |
| 36 | -1048.751110 | -1048.250284 | 0.7 | 2.0 |
| 37 | -1048.750321 | -1048.250987 | 1.2 | 1.6 |
| 38 | -1048.750260 | -1048.251125 | 1.2 | 1.5 |
| 39 | -1048.750265 | -1048.251327 | 1.2 | 1.4 |
| 40 | -1048.749716 | -1048.248905 | 1.6 | 2.9 |
| 41 | -1048.751290 | -1048.250594 | 0.6 | 1.8 |
| 42 | -1048.750770 | -1048.250814 | 0.9 | 1.7 |
| 43 | -1048.750445 | -1048.251845 | 1.1 | 1.0 |
| 44 | -1048.749244 | -1048.249960 | 1.9 | 2.2 |
| 45 | -1048.749908 | -1048.252440 | 1.4 | 0.7 |
| 46 | -1048.749302 | -1048.251339 | 1.8 | 1.4 |
| 47 | -1048.750011 | -1048.252928 | 1.4 | 0.4 |
| 48 | -1048.749307 | -1048.249095 | 1.8 | 2.8 |
| 49 | -1048.749918 | -1048.250925 | 1.4 | 1.6 |
| 50 | -1048.750111 | -1048.251588 | 1.3 | 1.2 |
| 51 | -1048.750618 | -1048.250081 | 1.0 | 2.2 |
| 52 | -1048.749969 | -1048.251972 | 1.4 | 1.0 |
| 53 | -1048.749966 | -1048.251600 | 1.4 | 1.2 |
| 54 | -1048.749553 | -1048.251424 | 1.7 | 1.3 |
| 55 | -1048.749937 | -1048.251710 | 1.4 | 1.1 |
| 56 | -1048.750226 | -1048.249769 | 1.2 | 2.3 |
| 57 | -1048.750244 | -1048.250842 | 1.2 | 1.7 |
| 58 | -1048.750595 | -1048.250919 | 1.0 | 1.6 |
| 59 | -1048.750535 | -1048.250154 | 1.1 | 2.1 |
| 60 | -1048.750398 | -1048.249947 | 1.1 | 2.2 |
| 61 | -1048.749908 | -1048.251700 | 1.4 | 1.1 |
| 62 | -1048.750041 | -1048.250046 | 1.4 | 2.2 |
| 63 | -1048.750006 | -1048.250122 | 1.4 | 2.1 |
| 64 | -1048.751281 | -1048.251619 | 0.6 | 1.2 |
| 65 | -1048.749297 | -1048.249762 | 1.8 | 2.4 |
| 66 | -1048.750944 | -1048.252171 | 0.8 | 0.8 |
| 67 | -1048.749475 | -1048.249723 | 1.7 | 2.4 |
| 68 | -1048.749807 | -1048.249865 | 1.5 | 2.3 |
| 69 | -1048.749432 | -1048.250383 | 1.7 | 2.0 |
| 70 | -1048.750074 | -1048.250563 | 1.3 | 1.8 |
| 71 | -1048.749077 | -1048.250757 | 2.0 | 1.7 |
| 72 | -1048.749803 | -1048.250891 | 1.5 | 1.6 |
| 73 | -1048.749858 | -1048.251194 | 1.5 | 1.5 |

|      |              |              |     |     |
|------|--------------|--------------|-----|-----|
| 74   | -1048.749892 | -1048.250809 | 1.5 | 1.7 |
| 75   | -1048.750172 | -1048.250507 | 1.3 | 1.9 |
| 76   | -1048.749051 | -1048.250467 | 2.0 | 1.9 |
| 77   | -1048.749581 | -1048.248743 | 1.7 | 3.0 |
| 78   | -1048.750305 | -1048.252131 | 1.2 | 0.9 |
| 79   | -1048.749639 | -1048.250655 | 1.6 | 1.8 |
| 80   | -1048.749467 | -1048.250420 | 1.7 | 1.9 |
| Avg. | -1048.750953 | -1048.252142 |     |     |

**Table S48.** Conformational analysis for **3bd**.

| Conformer # | E            | G            | DE       | DG       |
|-------------|--------------|--------------|----------|----------|
|             | au           | au           | kcal/mol | kcal/mol |
| 1           | -1048.353459 | -1047.862457 | 0.0      | 0.5      |
| 2           | -1048.352822 | -1047.862416 | 0.4      | 0.6      |
| 3           | -1048.352058 | -1047.860819 | 0.9      | 1.6      |
| 4           | -1048.352264 | -1047.860678 | 0.8      | 1.6      |
| 5           | -1048.353027 | -1047.862389 | 0.3      | 0.6      |
| 6           | -1048.351306 | -1047.860434 | 1.4      | 1.8      |
| 7           | -1048.350654 | -1047.859474 | 1.8      | 2.4      |
| 8           | -1048.351862 | -1047.863179 | 1.0      | 0.1      |
| 9           | -1048.351907 | -1047.863169 | 1.0      | 0.1      |
| 10          | -1048.351922 | -1047.863297 | 1.0      | 0.0      |
| 11          | -1048.352724 | -1047.861877 | 0.5      | 0.9      |
| 12          | -1048.350875 | -1047.860889 | 1.6      | 1.5      |
| 13          | -1048.352175 | -1047.861539 | 0.8      | 1.1      |
| 14          | -1048.350436 | -1047.859436 | 1.9      | 2.4      |
| 15          | -1048.351999 | -1047.861437 | 0.9      | 1.2      |
| 16          | -1048.351474 | -1047.862324 | 1.2      | 0.6      |
| 17          | -1048.352078 | -1047.861776 | 0.9      | 1.0      |
| 18          | -1048.351439 | -1047.861918 | 1.3      | 0.9      |
| 19          | -1048.350860 | -1047.860785 | 1.6      | 1.6      |
| 20          | -1048.350417 | -1047.860649 | 1.9      | 1.7      |
| 21          | -1048.351361 | -1047.862752 | 1.3      | 0.3      |
| 22          | -1048.350963 | -1047.861760 | 1.6      | 1.0      |
| 23          | -1048.351045 | -1047.862039 | 1.5      | 0.8      |
| 24          | -1048.351294 | -1047.863028 | 1.4      | 0.2      |
| 25          | -1048.351120 | -1047.861879 | 1.5      | 0.9      |
| 26          | -1048.351029 | -1047.861986 | 1.5      | 0.8      |
| 27          | -1048.351082 | -1047.862584 | 1.5      | 0.4      |
| 28          | -1048.351066 | -1047.861940 | 1.5      | 0.9      |
| 29          | -1048.351085 | -1047.862359 | 1.5      | 0.6      |
| 30          | -1048.351275 | -1047.861091 | 1.4      | 1.4      |
| 31          | -1048.351161 | -1047.862023 | 1.4      | 0.8      |
| 32          | -1048.351050 | -1047.862118 | 1.5      | 0.7      |
| 33          | -1048.351834 | -1047.861783 | 1.0      | 0.9      |

|      |              |              |     |     |
|------|--------------|--------------|-----|-----|
| 34   | -1048.351036 | -1047.862249 | 1.5 | 0.7 |
| 35   | -1048.351035 | -1047.862153 | 1.5 | 0.7 |
| 36   | -1048.351345 | -1047.860924 | 1.3 | 1.5 |
| 37   | -1048.351108 | -1047.862010 | 1.5 | 0.8 |
| 38   | -1048.351412 | -1047.861629 | 1.3 | 1.0 |
| 39   | -1048.350394 | -1047.860178 | 1.9 | 2.0 |
| 40   | -1048.350992 | -1047.861874 | 1.5 | 0.9 |
| 41   | -1048.350299 | -1047.859282 | 2.0 | 2.5 |
| 42   | -1048.350972 | -1047.861998 | 1.6 | 0.8 |
| 43   | -1048.351340 | -1047.862336 | 1.3 | 0.6 |
| 44   | -1048.351520 | -1047.860972 | 1.2 | 1.5 |
| 45   | -1048.350367 | -1047.860091 | 1.9 | 2.0 |
| 46   | -1048.350923 | -1047.859405 | 1.6 | 2.4 |
| 47   | -1048.350989 | -1047.862000 | 1.5 | 0.8 |
| 48   | -1048.350997 | -1047.861875 | 1.5 | 0.9 |
| 49   | -1048.350976 | -1047.862096 | 1.6 | 0.8 |
| 50   | -1048.350600 | -1047.858466 | 1.8 | 3.0 |
| 51   | -1048.351276 | -1047.861228 | 1.4 | 1.3 |
| 52   | -1048.351261 | -1047.860792 | 1.4 | 1.6 |
| 53   | -1048.351815 | -1047.861069 | 1.0 | 1.4 |
| 54   | -1048.351125 | -1047.861097 | 1.5 | 1.4 |
| 55   | -1048.350481 | -1047.859112 | 1.9 | 2.6 |
| 56   | -1048.350911 | -1047.860903 | 1.6 | 1.5 |
| 57   | -1048.351236 | -1047.861908 | 1.4 | 0.9 |
| 58   | -1048.350394 | -1047.859775 | 1.9 | 2.2 |
| 59   | -1048.350929 | -1047.861042 | 1.6 | 1.4 |
| 60   | -1048.350912 | -1047.860906 | 1.6 | 1.5 |
| Avg. | -1048.351958 | -1047.862265 |     |     |

**Table S49.** Conformational analysis for **6bd<sup>†</sup>**.

| Conformer # | E            | G            | DE       | DG       |
|-------------|--------------|--------------|----------|----------|
|             | au           | au           | kcal/mol | kcal/mol |
| 1           | -1048.750882 | -1048.250645 | 0.0      | 0.7      |
| 2           | -1048.750126 | -1048.249575 | 0.5      | 1.4      |
| 3           | -1048.750802 | -1048.250732 | 0.1      | 0.6      |
| 4           | -1048.750443 | -1048.250745 | 0.3      | 0.6      |
| 5           | -1048.750733 | -1048.250185 | 0.1      | 1.0      |
| 6           | -1048.748458 | -1048.247345 | 1.5      | 2.8      |
| 7           | -1048.750340 | -1048.249729 | 0.4      | 1.3      |
| 8           | -1048.749882 | -1048.250749 | 0.6      | 0.6      |
| 9           | -1048.748584 | -1048.248054 | 1.5      | 2.3      |
| 10          | -1048.750303 | -1048.250055 | 0.4      | 1.1      |
| 11          | -1048.749141 | -1048.249122 | 1.1      | 1.6      |
| 12          | -1048.750502 | -1048.249322 | 0.3      | 1.5      |
| 13          | -1048.749153 | -1048.249805 | 1.1      | 1.2      |

|    |              |              |     |     |
|----|--------------|--------------|-----|-----|
| 14 | -1048.748151 | -1048.248298 | 1.7 | 2.2 |
| 15 | -1048.749603 | -1048.250234 | 0.8 | 0.9 |
| 16 | -1048.749482 | -1048.250529 | 0.9 | 0.8 |
| 17 | -1048.749432 | -1048.248527 | 0.9 | 2.0 |
| 18 | -1048.749694 | -1048.250310 | 0.8 | 0.9 |
| 19 | -1048.748278 | -1048.246727 | 1.7 | 3.1 |
| 20 | -1048.748729 | -1048.248531 | 1.4 | 2.0 |
| 21 | -1048.749472 | -1048.249572 | 0.9 | 1.4 |
| 22 | -1048.749297 | -1048.249802 | 1.0 | 1.2 |
| 23 | -1048.750080 | -1048.249482 | 0.5 | 1.4 |
| 24 | -1048.749261 | -1048.249671 | 1.0 | 1.3 |
| 25 | -1048.748801 | -1048.249466 | 1.3 | 1.4 |
| 26 | -1048.748794 | -1048.249467 | 1.3 | 1.4 |
| 27 | -1048.748787 | -1048.249390 | 1.3 | 1.5 |
| 28 | -1048.748072 | -1048.247884 | 1.8 | 2.4 |
| 29 | -1048.749026 | -1048.249593 | 1.2 | 1.3 |
| 30 | -1048.749567 | -1048.249356 | 0.8 | 1.5 |
| 31 | -1048.749288 | -1048.248118 | 1.0 | 2.3 |
| 32 | -1048.749211 | -1048.250383 | 1.1 | 0.8 |
| 33 | -1048.748113 | -1048.247972 | 1.8 | 2.4 |
| 34 | -1048.748792 | -1048.249201 | 1.3 | 1.6 |
| 35 | -1048.748023 | -1048.247870 | 1.8 | 2.4 |
| 36 | -1048.748581 | -1048.249334 | 1.5 | 1.5 |
| 37 | -1048.748118 | -1048.247991 | 1.8 | 2.3 |
| 38 | -1048.748768 | -1048.249333 | 1.3 | 1.5 |
| 39 | -1048.747958 | -1048.246174 | 1.9 | 3.5 |
| 40 | -1048.748773 | -1048.247103 | 1.3 | 2.9 |
| 41 | -1048.749415 | -1048.248775 | 0.9 | 1.9 |
| 42 | -1048.748570 | -1048.249661 | 1.5 | 1.3 |
| 43 | -1048.749332 | -1048.249706 | 1.0 | 1.3 |
| 44 | -1048.748410 | -1048.248993 | 1.6 | 1.7 |
| 45 | -1048.748600 | -1048.249381 | 1.4 | 1.5 |
| 46 | -1048.748891 | -1048.248913 | 1.3 | 1.8 |
| 47 | -1048.748420 | -1048.248181 | 1.6 | 2.2 |
| 48 | -1048.748553 | -1048.247990 | 1.5 | 2.3 |
| 49 | -1048.749686 | -1048.250557 | 0.8 | 0.7 |
| 50 | -1048.748898 | -1048.248637 | 1.3 | 1.9 |
| 51 | -1048.748100 | -1048.248069 | 1.8 | 2.3 |
| 52 | -1048.748533 | -1048.249002 | 1.5 | 1.7 |
| 53 | -1048.748031 | -1048.248637 | 1.8 | 1.9 |
| 54 | -1048.747853 | -1048.247562 | 1.9 | 2.6 |
| 55 | -1048.747896 | -1048.248659 | 1.9 | 1.9 |
| 56 | -1048.747959 | -1048.247306 | 1.9 | 2.8 |
| 57 | -1048.748339 | -1048.249166 | 1.6 | 1.6 |
| 58 | -1048.748986 | -1048.248808 | 1.2 | 1.8 |



|      |              |              |     |     |
|------|--------------|--------------|-----|-----|
| 59   | -1048.748234 | -1048.249401 | 1.7 | 1.5 |
| 60   | -1048.749004 | -1048.248242 | 1.2 | 2.2 |
| 61   | -1048.748332 | -1048.248583 | 1.6 | 2.0 |
| 62   | -1048.748412 | -1048.248764 | 1.6 | 1.9 |
| 63   | -1048.748481 | -1048.248776 | 1.5 | 1.9 |
| 64   | -1048.748218 | -1048.248894 | 1.7 | 1.8 |
| 65   | -1048.750497 | -1048.251730 | 0.3 | 0.0 |
| 66   | -1048.748380 | -1048.248972 | 1.6 | 1.7 |
| 67   | -1048.747845 | -1048.247810 | 1.9 | 2.5 |
| 68   | -1048.749892 | -1048.250489 | 0.6 | 0.8 |
| 69   | -1048.747946 | -1048.248281 | 1.9 | 2.2 |
| 70   | -1048.747896 | -1048.248233 | 1.9 | 2.2 |
| 71   | -1048.748459 | -1048.248013 | 1.5 | 2.3 |
| 72   | -1048.748093 | -1048.248437 | 1.8 | 2.1 |
| 73   | -1048.747819 | -1048.248654 | 1.9 | 1.9 |
| 74   | -1048.748550 | -1048.247907 | 1.5 | 2.4 |
| 75   | -1048.748848 | -1048.248300 | 1.3 | 2.2 |
| 76   | -1048.747781 | -1048.248390 | 2.0 | 2.1 |
| 77   | -1048.750910 | -1048.250803 | 0.0 | 0.6 |
| 78   | -1048.748845 | -1048.248302 | 1.3 | 2.2 |
| 79   | -1048.748727 | -1048.248800 | 1.4 | 1.8 |
| 80   | -1048.749364 | -1048.249071 | 1.0 | 1.7 |
| 81   | -1048.748223 | -1048.247857 | 1.7 | 2.4 |
| 82   | -1048.748114 | -1048.247233 | 1.8 | 2.8 |
| 83   | -1048.748586 | -1048.247806 | 1.5 | 2.5 |
| Avg. | -1048.749777 | -1048.250090 |     |     |

**Table S50.** Conformational analysis for **6bd**.

| Conformer # | E            | G            | DE       | DG       |
|-------------|--------------|--------------|----------|----------|
|             | au           | au           | kcal/mol | kcal/mol |
| 1           | -1048.338555 | -1047.848307 | 0.0      | 0.0      |
| 2           | -1048.338251 | -1047.847702 | 0.2      | 0.4      |
| 3           | -1048.337961 | -1047.847258 | 0.4      | 0.7      |
| 4           | -1048.338103 | -1047.847316 | 0.3      | 0.7      |
| 5           | -1048.337461 | -1047.846817 | 0.7      | 1.0      |
| 6           | -1048.337654 | -1047.847263 | 0.6      | 0.7      |
| 7           | -1048.338598 | -1047.848371 | 0.0      | 0.0      |
| 8           | -1048.338159 | -1047.847553 | 0.3      | 0.5      |
| 9           | -1048.338314 | -1047.847647 | 0.2      | 0.5      |
| 10          | -1048.337399 | -1047.846002 | 0.8      | 1.5      |
| 11          | -1048.337536 | -1047.846990 | 0.7      | 0.9      |
| 12          | -1048.337927 | -1047.847345 | 0.4      | 0.6      |
| 13          | -1048.337434 | -1047.846205 | 0.7      | 1.4      |
| 14          | -1048.338126 | -1047.847284 | 0.3      | 0.7      |
| 15          | -1048.336364 | -1047.845657 | 1.4      | 1.7      |

|      |              |              |     |     |
|------|--------------|--------------|-----|-----|
| 16   | -1048.336628 | -1047.845911 | 1.2 | 1.5 |
| 17   | -1048.337436 | -1047.846984 | 0.7 | 0.9 |
| 18   | -1048.335749 | -1047.843189 | 1.8 | 3.3 |
| 19   | -1048.337650 | -1047.847497 | 0.6 | 0.5 |
| 20   | -1048.335739 | -1047.844354 | 1.8 | 2.5 |
| 21   | -1048.336837 | -1047.846672 | 1.1 | 1.1 |
| 22   | -1048.337805 | -1047.847768 | 0.5 | 0.4 |
| 23   | -1048.336733 | -1047.845079 | 1.2 | 2.1 |
| 24   | -1048.335730 | -1047.844626 | 1.8 | 2.3 |
| 25   | -1048.335510 | -1047.844156 | 1.9 | 2.6 |
| 26   | -1048.337742 | -1047.845565 | 0.5 | 1.8 |
| 27   | -1048.336762 | -1047.844230 | 1.2 | 2.6 |
| 28   | -1048.336910 | -1047.844551 | 1.1 | 2.4 |
| 29   | -1048.336233 | -1047.845060 | 1.5 | 2.1 |
| 30   | -1048.335989 | -1047.843790 | 1.6 | 2.9 |
| 31   | -1048.336095 | -1047.844566 | 1.6 | 2.4 |
| 32   | -1048.336756 | -1047.845939 | 1.2 | 1.5 |
| 33   | -1048.337339 | -1047.846139 | 0.8 | 1.4 |
| 34   | -1048.335678 | -1047.844275 | 1.8 | 2.6 |
| 35   | -1048.337440 | -1047.846217 | 0.7 | 1.4 |
| 36   | -1048.337142 | -1047.846944 | 0.9 | 0.9 |
| 37   | -1048.336486 | -1047.843987 | 1.3 | 2.8 |
| 38   | -1048.336370 | -1047.845649 | 1.4 | 1.7 |
| 39   | -1048.336876 | -1047.846688 | 1.1 | 1.1 |
| 40   | -1048.336651 | -1047.845876 | 1.2 | 1.6 |
| 41   | -1048.336713 | -1047.846548 | 1.2 | 1.1 |
| 42   | -1048.335757 | -1047.843145 | 1.8 | 3.3 |
| Avg. | -1048.337739 | -1047.847376 |     |     |

**Table S51.** Conformational analysis for **3be<sup>‡</sup>**.

| Conformer # | E            | G            | DE       | DG       |
|-------------|--------------|--------------|----------|----------|
|             | au           | au           | kcal/mol | kcal/mol |
| 1           | -1088.051930 | -1087.522997 | 0.0      | 0.9      |
| 2           | -1088.049523 | -1087.523764 | 1.5      | 0.4      |
| 3           | -1088.049513 | -1087.523213 | 1.5      | 0.8      |
| 4           | -1088.048879 | -1087.523236 | 1.9      | 0.8      |
| 5           | -1088.049892 | -1087.523643 | 1.3      | 0.5      |
| 6           | -1088.049782 | -1087.522608 | 1.3      | 1.2      |
| 7           | -1088.050251 | -1087.523122 | 1.1      | 0.8      |
| 8           | -1088.048786 | -1087.522605 | 2.0      | 1.2      |
| 9           | -1088.050207 | -1087.522461 | 1.1      | 1.3      |
| 10          | -1088.050285 | -1087.523304 | 1.0      | 0.7      |
| 11          | -1088.050023 | -1087.521986 | 1.2      | 1.5      |
| 12          | -1088.048867 | -1087.522018 | 1.9      | 1.5      |
| 13          | -1088.049338 | -1087.522810 | 1.6      | 1.0      |

|      |              |              |     |     |
|------|--------------|--------------|-----|-----|
| 14   | -1088.049801 | -1087.523254 | 1.3 | 0.8 |
| 15   | -1088.050324 | -1087.522556 | 1.0 | 1.2 |
| 16   | -1088.050190 | -1087.524131 | 1.1 | 0.2 |
| 17   | -1088.050085 | -1087.522001 | 1.2 | 1.5 |
| 18   | -1088.050107 | -1087.524454 | 1.1 | 0.0 |
| 19   | -1088.049374 | -1087.523456 | 1.6 | 0.6 |
| 20   | -1088.049817 | -1087.522134 | 1.3 | 1.5 |
| 21   | -1088.048967 | -1087.522647 | 1.9 | 1.1 |
| 22   | -1088.049009 | -1087.522394 | 1.8 | 1.3 |
| 23   | -1088.048842 | -1087.522532 | 1.9 | 1.2 |
| 24   | -1088.050211 | -1087.522546 | 1.1 | 1.2 |
| 25   | -1088.049689 | -1087.522397 | 1.4 | 1.3 |
| 26   | -1088.049194 | -1087.523252 | 1.7 | 0.8 |
| 27   | -1088.049850 | -1087.522850 | 1.3 | 1.0 |
| 28   | -1088.049259 | -1087.523923 | 1.7 | 0.3 |
| 29   | -1088.049015 | -1087.522704 | 1.8 | 1.1 |
| 30   | -1088.049327 | -1087.523225 | 1.6 | 0.8 |
| 31   | -1088.049197 | -1087.523279 | 1.7 | 0.7 |
| 32   | -1088.049331 | -1087.523289 | 1.6 | 0.7 |
| 33   | -1088.049093 | -1087.522696 | 1.8 | 1.1 |
| 34   | -1088.049156 | -1087.523031 | 1.7 | 0.9 |
| 35   | -1088.049182 | -1087.523250 | 1.7 | 0.8 |
| 36   | -1088.048860 | -1087.521753 | 1.9 | 1.7 |
| 37   | -1088.049180 | -1087.523419 | 1.7 | 0.6 |
| 38   | -1088.050006 | -1087.522997 | 1.2 | 0.9 |
| 39   | -1088.049000 | -1087.522849 | 1.8 | 1.0 |
| 40   | -1088.049505 | -1087.521896 | 1.5 | 1.6 |
| 41   | -1088.049391 | -1087.521965 | 1.6 | 1.6 |
| 42   | -1088.049256 | -1087.523374 | 1.7 | 0.7 |
| Avg. | -1088.050222 | -1087.523324 |     |     |

**Table S52.** Conformational analysis for **3be**.

| Conformer # | E            | G            | DE       | DG       |
|-------------|--------------|--------------|----------|----------|
|             | au           | au           | kcal/mol | kcal/mol |
| 1           | -1087.652493 | -1087.134702 | 0.3      | 0.7      |
| 2           | -1087.651591 | -1087.133294 | 0.9      | 1.6      |
| 3           | -1087.652863 | -1087.135092 | 0.1      | 0.5      |
| 4           | -1087.652570 | -1087.134696 | 0.2      | 0.7      |
| 5           | -1087.651850 | -1087.133111 | 0.7      | 1.7      |
| 6           | -1087.652401 | -1087.134575 | 0.4      | 0.8      |
| 7           | -1087.652830 | -1087.135405 | 0.1      | 0.3      |
| 8           | -1087.650875 | -1087.132752 | 1.3      | 1.9      |
| 9           | -1087.652853 | -1087.134891 | 0.1      | 0.6      |
| 10          | -1087.652961 | -1087.134674 | 0.0      | 0.7      |
| 11          | -1087.651550 | -1087.135603 | 0.9      | 0.2      |

|    |              |              |     |     |
|----|--------------|--------------|-----|-----|
| 12 | -1087.651408 | -1087.135633 | 1.0 | 0.1 |
| 13 | -1087.651026 | -1087.133048 | 1.2 | 1.8 |
| 14 | -1087.651328 | -1087.134476 | 1.0 | 0.9 |
| 15 | -1087.651148 | -1087.133277 | 1.1 | 1.6 |
| 16 | -1087.651250 | -1087.135084 | 1.1 | 0.5 |
| 17 | -1087.651431 | -1087.135357 | 1.0 | 0.3 |
| 18 | -1087.650568 | -1087.134354 | 1.5 | 0.9 |
| 19 | -1087.652266 | -1087.134144 | 0.4 | 1.1 |
| 20 | -1087.650590 | -1087.133417 | 1.5 | 1.5 |
| 21 | -1087.651608 | -1087.135842 | 0.8 | 0.0 |
| 22 | -1087.651687 | -1087.135593 | 0.8 | 0.2 |
| 23 | -1087.652510 | -1087.134469 | 0.3 | 0.9 |
| 24 | -1087.652554 | -1087.134025 | 0.3 | 1.1 |
| 25 | -1087.651386 | -1087.134653 | 1.0 | 0.7 |
| 26 | -1087.651997 | -1087.134823 | 0.6 | 0.6 |
| 27 | -1087.650525 | -1087.133495 | 1.5 | 1.5 |
| 28 | -1087.650839 | -1087.134458 | 1.3 | 0.9 |
| 29 | -1087.650681 | -1087.134181 | 1.4 | 1.0 |
| 30 | -1087.650947 | -1087.135674 | 1.3 | 0.1 |
| 31 | -1087.652021 | -1087.134729 | 0.6 | 0.7 |
| 32 | -1087.650313 | -1087.133080 | 1.7 | 1.7 |
| 33 | -1087.650780 | -1087.134635 | 1.4 | 0.8 |
| 34 | -1087.650740 | -1087.134459 | 1.4 | 0.9 |
| 35 | -1087.651274 | -1087.135246 | 1.1 | 0.4 |
| 36 | -1087.651439 | -1087.135535 | 1.0 | 0.2 |
| 37 | -1087.650741 | -1087.134749 | 1.4 | 0.7 |
| 38 | -1087.651282 | -1087.134215 | 1.1 | 1.0 |
| 39 | -1087.650297 | -1087.132928 | 1.7 | 1.8 |
| 40 | -1087.650134 | -1087.132251 | 1.8 | 2.3 |
| 41 | -1087.650710 | -1087.134359 | 1.4 | 0.9 |
| 42 | -1087.651416 | -1087.135635 | 1.0 | 0.1 |
| 43 | -1087.650751 | -1087.134515 | 1.4 | 0.8 |
| 44 | -1087.650559 | -1087.135105 | 1.5 | 0.5 |
| 45 | -1087.650716 | -1087.134379 | 1.4 | 0.9 |
| 46 | -1087.650849 | -1087.132495 | 1.3 | 2.1 |
| 47 | -1087.650676 | -1087.134575 | 1.4 | 0.8 |
| 48 | -1087.650824 | -1087.135006 | 1.3 | 0.5 |
| 49 | -1087.650088 | -1087.132441 | 1.8 | 2.1 |
| 50 | -1087.650590 | -1087.134501 | 1.5 | 0.8 |
| 51 | -1087.650833 | -1087.133749 | 1.3 | 1.3 |
| 52 | -1087.652166 | -1087.134509 | 0.5 | 0.8 |
| 53 | -1087.651410 | -1087.134152 | 1.0 | 1.1 |
| 54 | -1087.650942 | -1087.134586 | 1.3 | 0.8 |
| 55 | -1087.650891 | -1087.134628 | 1.3 | 0.8 |
| 56 | -1087.651479 | -1087.133907 | 0.9 | 1.2 |

|      |              |              |     |     |
|------|--------------|--------------|-----|-----|
| 57   | -1087.650928 | -1087.134660 | 1.3 | 0.7 |
| 58   | -1087.650824 | -1087.134412 | 1.3 | 0.9 |
| 59   | -1087.650923 | -1087.134537 | 1.3 | 0.8 |
| 60   | -1087.650955 | -1087.134185 | 1.3 | 1.0 |
| 61   | -1087.650442 | -1087.132950 | 1.6 | 1.8 |
| 62   | -1087.651117 | -1087.133651 | 1.2 | 1.4 |
| 63   | -1087.650796 | -1087.134357 | 1.4 | 0.9 |
| 64   | -1087.650652 | -1087.132781 | 1.4 | 1.9 |
| 65   | -1087.650717 | -1087.134181 | 1.4 | 1.0 |
| 66   | -1087.650849 | -1087.134414 | 1.3 | 0.9 |
| 67   | -1087.650720 | -1087.133799 | 1.4 | 1.3 |
| 68   | -1087.650173 | -1087.132232 | 1.7 | 2.3 |
| 69   | -1087.650112 | -1087.133807 | 1.8 | 1.3 |
| 70   | -1087.650910 | -1087.134219 | 1.3 | 1.0 |
| 71   | -1087.650236 | -1087.132492 | 1.7 | 2.1 |
| 72   | -1087.650657 | -1087.133352 | 1.4 | 1.6 |
| 73   | -1087.650179 | -1087.134345 | 1.7 | 0.9 |
| 74   | -1087.650681 | -1087.133617 | 1.4 | 1.4 |
| 75   | -1087.650626 | -1087.133667 | 1.5 | 1.4 |
| 76   | -1087.649968 | -1087.133224 | 1.9 | 1.6 |
| 77   | -1087.650925 | -1087.134455 | 1.3 | 0.9 |
| 78   | -1087.649788 | -1087.133040 | 2.0 | 1.8 |
| 79   | -1087.650560 | -1087.133655 | 1.5 | 1.4 |
| 80   | -1087.650000 | -1087.133478 | 1.9 | 1.5 |
| 81   | -1087.649942 | -1087.133394 | 1.9 | 1.5 |
| 82   | -1087.649839 | -1087.133682 | 2.0 | 1.4 |
| 83   | -1087.649822 | -1087.133359 | 2.0 | 1.6 |
| 84   | -1087.649828 | -1087.133607 | 2.0 | 1.4 |
| 85   | -1087.649885 | -1087.134413 | 1.9 | 0.9 |
| 86   | -1087.649838 | -1087.133186 | 2.0 | 1.7 |
| 87   | -1087.649875 | -1087.133830 | 1.9 | 1.3 |
| 88   | -1087.649867 | -1087.133904 | 1.9 | 1.2 |
| 89   | -1087.650896 | -1087.133114 | 1.3 | 1.7 |
| 90   | -1087.650443 | -1087.133762 | 1.6 | 1.3 |
| 91   | -1087.649836 | -1087.133175 | 2.0 | 1.7 |
| 92   | -1087.650440 | -1087.133617 | 1.6 | 1.4 |
| Avg. | -1087.651789 | -1087.134791 |     |     |

**Table S53.** Conformational analysis for **6be<sup>+</sup>**.

| Conformer # | E            | G            | DE       | DG       |
|-------------|--------------|--------------|----------|----------|
|             | au           | au           | kcal/mol | kcal/mol |
| 1           | -1088.046467 | -1087.518322 | 0.0      | 0.9      |
| 2           | -1088.045880 | -1087.519481 | 0.4      | 0.2      |
| 3           | -1088.046402 | -1087.518251 | 0.0      | 1.0      |
| 4           | -1088.045660 | -1087.517501 | 0.5      | 1.4      |
| 5           | -1088.045346 | -1087.518837 | 0.7      | 0.6      |
| 6           | -1088.045414 | -1087.517826 | 0.7      | 1.2      |
| 7           | -1088.045296 | -1087.519129 | 0.7      | 0.4      |
| 8           | -1088.045300 | -1087.517515 | 0.7      | 1.4      |
| 9           | -1088.044964 | -1087.516630 | 0.9      | 2.0      |
| 10          | -1088.045115 | -1087.518445 | 0.8      | 0.9      |
| 11          | -1088.044959 | -1087.517297 | 0.9      | 1.6      |
| 12          | -1088.044980 | -1087.518461 | 0.9      | 0.8      |
| 13          | -1088.044847 | -1087.517410 | 1.0      | 1.5      |
| 14          | -1088.043988 | -1087.515520 | 1.6      | 2.7      |
| 15          | -1088.045453 | -1087.517329 | 0.6      | 1.6      |
| 16          | -1088.044542 | -1087.516769 | 1.2      | 1.9      |
| 17          | -1088.044311 | -1087.517604 | 1.4      | 1.4      |
| 18          | -1088.045832 | -1087.519803 | 0.4      | 0.0      |
| 19          | -1088.044692 | -1087.518181 | 1.1      | 1.0      |
| 20          | -1088.045478 | -1087.518033 | 0.6      | 1.1      |
| 21          | -1088.045025 | -1087.517708 | 0.9      | 1.3      |
| 22          | -1088.045341 | -1087.516525 | 0.7      | 2.1      |
| 23          | -1088.044099 | -1087.516944 | 1.5      | 1.8      |
| 24          | -1088.044097 | -1087.515994 | 1.5      | 2.4      |
| 25          | -1088.044258 | -1087.517492 | 1.4      | 1.5      |
| 26          | -1088.044844 | -1087.517944 | 1.0      | 1.2      |
| 27          | -1088.044964 | -1087.517272 | 0.9      | 1.6      |
| 28          | -1088.044711 | -1087.517674 | 1.1      | 1.3      |
| 29          | -1088.043877 | -1087.516706 | 1.6      | 1.9      |
| 30          | -1088.044110 | -1087.517075 | 1.5      | 1.7      |
| 31          | -1088.043799 | -1087.516049 | 1.7      | 2.4      |
| 32          | -1088.043907 | -1087.516585 | 1.6      | 2.0      |
| 33          | -1088.043706 | -1087.516455 | 1.7      | 2.1      |
| 34          | -1088.045189 | -1087.518288 | 0.8      | 1.0      |
| 35          | -1088.043805 | -1087.516710 | 1.7      | 1.9      |
| 36          | -1088.043695 | -1087.516018 | 1.7      | 2.4      |
| 37          | -1088.045196 | -1087.518682 | 0.8      | 0.7      |
| 38          | -1088.045026 | -1087.518251 | 0.9      | 1.0      |
| 39          | -1088.043838 | -1087.516867 | 1.6      | 1.8      |
| 40          | -1088.043815 | -1087.516693 | 1.7      | 2.0      |
| 41          | -1088.044152 | -1087.517630 | 1.5      | 1.4      |
| 42          | -1088.043456 | -1087.516754 | 1.9      | 1.9      |

|      |              |              |     |     |
|------|--------------|--------------|-----|-----|
| 43   | -1088.043901 | -1087.516868 | 1.6 | 1.8 |
| 44   | -1088.044210 | -1087.515986 | 1.4 | 2.4 |
| 45   | -1088.044616 | -1087.516649 | 1.2 | 2.0 |
| 46   | -1088.044711 | -1087.517245 | 1.1 | 1.6 |
| 47   | -1088.044168 | -1087.516800 | 1.4 | 1.9 |
| 48   | -1088.044623 | -1087.516593 | 1.2 | 2.0 |
| 49   | -1088.044316 | -1087.516934 | 1.3 | 1.8 |
| 50   | -1088.043328 | -1087.515512 | 2.0 | 2.7 |
| 51   | -1088.043983 | -1087.517123 | 1.6 | 1.7 |
| 52   | -1088.043384 | -1087.516338 | 1.9 | 2.2 |
| 53   | -1088.043518 | -1087.517391 | 1.9 | 1.5 |
| 54   | -1088.044778 | -1087.516865 | 1.1 | 1.8 |
| 55   | -1088.043328 | -1087.516549 | 2.0 | 2.0 |
| 56   | -1088.043412 | -1087.516751 | 1.9 | 1.9 |
| 57   | -1088.043442 | -1087.517065 | 1.9 | 1.7 |
| 58   | -1088.043776 | -1087.516684 | 1.7 | 2.0 |
| 59   | -1088.044219 | -1087.516258 | 1.4 | 2.2 |
| 60   | -1088.043501 | -1087.516841 | 1.9 | 1.9 |
| 61   | -1088.044168 | -1087.516611 | 1.4 | 2.0 |
| 62   | -1088.043520 | -1087.514885 | 1.8 | 3.1 |
| 63   | -1088.043825 | -1087.515111 | 1.7 | 2.9 |
| 64   | -1088.044417 | -1087.518480 | 1.3 | 0.8 |
| 65   | -1088.044174 | -1087.516809 | 1.4 | 1.9 |
| 66   | -1088.043896 | -1087.516197 | 1.6 | 2.3 |
| 67   | -1088.044402 | -1087.516563 | 1.3 | 2.0 |
| 68   | -1088.043544 | -1087.515796 | 1.8 | 2.5 |
| 69   | -1088.043456 | -1087.515639 | 1.9 | 2.6 |
| Avg. | -1088.045156 | -1087.518297 |     |     |

**Table S54.** Conformational analysis for **6be**.

| Conformer # | E            | G            | DE       | DG       |
|-------------|--------------|--------------|----------|----------|
|             | au           | au           | kcal/mol | kcal/mol |
| 1           | -1087.634767 | -1087.117858 | 0.1      | 0.0      |
| 2           | -1087.634766 | -1087.117498 | 0.1      | 0.2      |
| 3           | -1087.634253 | -1087.117176 | 0.5      | 0.4      |
| 4           | -1087.634588 | -1087.116753 | 0.2      | 0.7      |
| 5           | -1087.634088 | -1087.116455 | 0.6      | 0.9      |
| 6           | -1087.634566 | -1087.117275 | 0.3      | 0.4      |
| 7           | -1087.633895 | -1087.116855 | 0.7      | 0.6      |
| 8           | -1087.634818 | -1087.117704 | 0.1      | 0.1      |
| 9           | -1087.634981 | -1087.116507 | 0.0      | 0.8      |
| 10          | -1087.634896 | -1087.116806 | 0.1      | 0.7      |
| 11          | -1087.634173 | -1087.116680 | 0.5      | 0.7      |
| 12          | -1087.632682 | -1087.113607 | 1.4      | 2.7      |
| 13          | -1087.633972 | -1087.116430 | 0.6      | 0.9      |

|      |              |              |     |     |
|------|--------------|--------------|-----|-----|
| 14   | -1087.633681 | -1087.116159 | 0.8 | 1.1 |
| 15   | -1087.633911 | -1087.115516 | 0.7 | 1.5 |
| 16   | -1087.633236 | -1087.115617 | 1.1 | 1.4 |
| 17   | -1087.633823 | -1087.115700 | 0.7 | 1.4 |
| 18   | -1087.633815 | -1087.116410 | 0.7 | 0.9 |
| 19   | -1087.633652 | -1087.115710 | 0.8 | 1.3 |
| 20   | -1087.633155 | -1087.115339 | 1.1 | 1.6 |
| 21   | -1087.633378 | -1087.114981 | 1.0 | 1.8 |
| 22   | -1087.632389 | -1087.113931 | 1.6 | 2.5 |
| 23   | -1087.634012 | -1087.114672 | 0.6 | 2.0 |
| 24   | -1087.632817 | -1087.115386 | 1.4 | 1.6 |
| 25   | -1087.632554 | -1087.115449 | 1.5 | 1.5 |
| 26   | -1087.634546 | -1087.115043 | 0.3 | 1.8 |
| 27   | -1087.632265 | -1087.113887 | 1.7 | 2.5 |
| 28   | -1087.633219 | -1087.115228 | 1.1 | 1.7 |
| 29   | -1087.633945 | -1087.115350 | 0.7 | 1.6 |
| 30   | -1087.633414 | -1087.115084 | 1.0 | 1.7 |
| 31   | -1087.633981 | -1087.114524 | 0.6 | 2.1 |
| 32   | -1087.632363 | -1087.115026 | 1.6 | 1.8 |
| 33   | -1087.632508 | -1087.115190 | 1.6 | 1.7 |
| 34   | -1087.632447 | -1087.115003 | 1.6 | 1.8 |
| 35   | -1087.632699 | -1087.115255 | 1.4 | 1.6 |
| 36   | -1087.632816 | -1087.114651 | 1.4 | 2.0 |
| 37   | -1087.633974 | -1087.116359 | 0.6 | 0.9 |
| 38   | -1087.633446 | -1087.114990 | 1.0 | 1.8 |
| 39   | -1087.632087 | -1087.113875 | 1.8 | 2.5 |
| 40   | -1087.632199 | -1087.114682 | 1.7 | 2.0 |
| 41   | -1087.632332 | -1087.113776 | 1.7 | 2.6 |
| 42   | -1087.632681 | -1087.113451 | 1.4 | 2.8 |
| 43   | -1087.632265 | -1087.113883 | 1.7 | 2.5 |
| 44   | -1087.633436 | -1087.114199 | 1.0 | 2.3 |
| 45   | -1087.633809 | -1087.116378 | 0.7 | 0.9 |
| 46   | -1087.631887 | -1087.114504 | 1.9 | 2.1 |
| 47   | -1087.632462 | -1087.115209 | 1.6 | 1.7 |
| 48   | -1087.633152 | -1087.115334 | 1.1 | 1.6 |
| 49   | -1087.631944 | -1087.113460 | 1.9 | 2.8 |
| 50   | -1087.632018 | -1087.114292 | 1.9 | 2.2 |
| 51   | -1087.631869 | -1087.113031 | 2.0 | 3.0 |
| 52   | -1087.631831 | -1087.113898 | 2.0 | 2.5 |
| 53   | -1087.632378 | -1087.115701 | 1.6 | 1.4 |
| 54   | -1087.632323 | -1087.113255 | 1.7 | 2.9 |
| 55   | -1087.632422 | -1087.114507 | 1.6 | 2.1 |
| Avg. | -1087.634089 | -1087.116701 |     |     |



**Table S55.** Conformational analysis for **3b<sup>†</sup>**.

| Conformer # | E            | G            | DE       | DG       |
|-------------|--------------|--------------|----------|----------|
|             | au           | au           | kcal/mol | kcal/mol |
| 1           | -1127.355495 | -1126.800826 | 0.0      | 0.7      |
| 2           | -1127.353364 | -1126.798268 | 1.3      | 2.3      |
| 3           | -1127.354822 | -1126.801658 | 0.4      | 0.1      |
| 4           | -1127.353421 | -1126.798519 | 1.3      | 2.1      |
| 5           | -1127.353116 | -1126.800086 | 1.5      | 1.1      |
| 6           | -1127.354345 | -1126.800836 | 0.7      | 0.7      |
| 7           | -1127.352471 | -1126.799647 | 1.9      | 1.4      |
| 8           | -1127.352459 | -1126.799743 | 1.9      | 1.3      |
| 9           | -1127.352449 | -1126.799691 | 1.9      | 1.4      |
| 10          | -1127.354156 | -1126.800528 | 0.8      | 0.8      |
| 11          | -1127.352802 | -1126.799444 | 1.7      | 1.5      |
| 12          | -1127.352797 | -1126.799457 | 1.7      | 1.5      |
| 13          | -1127.354002 | -1126.799711 | 0.9      | 1.4      |
| 14          | -1127.354235 | -1126.800147 | 0.8      | 1.1      |
| 15          | -1127.353266 | -1126.798865 | 1.4      | 1.9      |
| 16          | -1127.353997 | -1126.801161 | 0.9      | 0.4      |
| 17          | -1127.353509 | -1126.799788 | 1.2      | 1.3      |
| 18          | -1127.354599 | -1126.799495 | 0.6      | 1.5      |
| 19          | -1127.353043 | -1126.800366 | 1.5      | 0.9      |
| 20          | -1127.352810 | -1126.798192 | 1.7      | 2.3      |
| 21          | -1127.354629 | -1126.800082 | 0.5      | 1.1      |
| 22          | -1127.352936 | -1126.799569 | 1.6      | 1.4      |
| 23          | -1127.354257 | -1126.799717 | 0.8      | 1.4      |
| 24          | -1127.352868 | -1126.799927 | 1.6      | 1.2      |
| 25          | -1127.352704 | -1126.799392 | 1.8      | 1.6      |
| 26          | -1127.352646 | -1126.799500 | 1.8      | 1.5      |
| 27          | -1127.353238 | -1126.799580 | 1.4      | 1.4      |
| 28          | -1127.353223 | -1126.799406 | 1.4      | 1.6      |
| 29          | -1127.353472 | -1126.800314 | 1.3      | 1.0      |
| 30          | -1127.352314 | -1126.797262 | 2.0      | 2.9      |
| 31          | -1127.353213 | -1126.798683 | 1.4      | 2.0      |
| 32          | -1127.353046 | -1126.798146 | 1.5      | 2.3      |
| 33          | -1127.353338 | -1126.799348 | 1.4      | 1.6      |
| 34          | -1127.353013 | -1126.799303 | 1.6      | 1.6      |
| 35          | -1127.352980 | -1126.799574 | 1.6      | 1.4      |
| 36          | -1127.354258 | -1126.799002 | 0.8      | 1.8      |
| 37          | -1127.352886 | -1126.798328 | 1.6      | 2.2      |
| 38          | -1127.353072 | -1126.799862 | 1.5      | 1.3      |
| 39          | -1127.352799 | -1126.800077 | 1.7      | 1.1      |
| 40          | -1127.352856 | -1126.800030 | 1.7      | 1.2      |
| 41          | -1127.352741 | -1126.798531 | 1.7      | 2.1      |
| 42          | -1127.354285 | -1126.798612 | 0.8      | 2.0      |

|      |              |              |     |     |
|------|--------------|--------------|-----|-----|
| 43   | -1127.352884 | -1126.798987 | 1.6 | 1.8 |
| 44   | -1127.354213 | -1126.799063 | 0.8 | 1.8 |
| 45   | -1127.352639 | -1126.799576 | 1.8 | 1.4 |
| 46   | -1127.352838 | -1126.799915 | 1.7 | 1.2 |
| 47   | -1127.352957 | -1126.799067 | 1.6 | 1.8 |
| 48   | -1127.352660 | -1126.800693 | 1.8 | 0.7 |
| 49   | -1127.352502 | -1126.798512 | 1.9 | 2.1 |
| 50   | -1127.352911 | -1126.798902 | 1.6 | 1.9 |
| 51   | -1127.352731 | -1126.801029 | 1.7 | 0.5 |
| 52   | -1127.353392 | -1126.799050 | 1.3 | 1.8 |
| 53   | -1127.352962 | -1126.799235 | 1.6 | 1.7 |
| 54   | -1127.353764 | -1126.800577 | 1.1 | 0.8 |
| 55   | -1127.352888 | -1126.799693 | 1.6 | 1.4 |
| 56   | -1127.352677 | -1126.799043 | 1.8 | 1.8 |
| 57   | -1127.353113 | -1126.798498 | 1.5 | 2.1 |
| 58   | -1127.352419 | -1126.798334 | 1.9 | 2.2 |
| 59   | -1127.354075 | -1126.799293 | 0.9 | 1.6 |
| 60   | -1127.354988 | -1126.801877 | 0.3 | 0.0 |
| 61   | -1127.352809 | -1126.799189 | 1.7 | 1.7 |
| 62   | -1127.352378 | -1126.798909 | 2.0 | 1.9 |
| Avg. | -1127.354036 | -1126.800442 |     |     |

**Table S56.** Conformational analysis for **3b**.

| Conformer # | E            | G            | DE       | DG       |
|-------------|--------------|--------------|----------|----------|
|             | au           | au           | kcal/mol | kcal/mol |
| 1           | -1126.953548 | -1126.409296 | 0.6      | 1.1      |
| 2           | -1126.954115 | -1126.409266 | 0.3      | 1.1      |
| 3           | -1126.954559 | -1126.409719 | 0.0      | 0.8      |
| 4           | -1126.953217 | -1126.407818 | 0.8      | 2.0      |
| 5           | -1126.951916 | -1126.407213 | 1.7      | 2.4      |
| 6           | -1126.952932 | -1126.409521 | 1.0      | 0.9      |
| 7           | -1126.952550 | -1126.410724 | 1.3      | 0.2      |
| 8           | -1126.952294 | -1126.410082 | 1.4      | 0.6      |
| 9           | -1126.952682 | -1126.410479 | 1.2      | 0.3      |
| 10          | -1126.953251 | -1126.408743 | 0.8      | 1.4      |
| 11          | -1126.952569 | -1126.411013 | 1.2      | 0.0      |
| 12          | -1126.951401 | -1126.408627 | 2.0      | 1.5      |
| 13          | -1126.953507 | -1126.408317 | 0.7      | 1.7      |
| 14          | -1126.953608 | -1126.409090 | 0.6      | 1.2      |
| 15          | -1126.952074 | -1126.407430 | 1.6      | 2.2      |
| 16          | -1126.952451 | -1126.407834 | 1.3      | 2.0      |
| 17          | -1126.951501 | -1126.408259 | 1.9      | 1.7      |
| 18          | -1126.952548 | -1126.408512 | 1.3      | 1.6      |
| 19          | -1126.952336 | -1126.409315 | 1.4      | 1.1      |
| 20          | -1126.951339 | -1126.406960 | 2.0      | 2.5      |

|      |              |              |     |     |
|------|--------------|--------------|-----|-----|
| 21   | -1126.951798 | -1126.408722 | 1.7 | 1.4 |
| 22   | -1126.951663 | -1126.408749 | 1.8 | 1.4 |
| 23   | -1126.951724 | -1126.409174 | 1.8 | 1.2 |
| 24   | -1126.951682 | -1126.407642 | 1.8 | 2.1 |
| 25   | -1126.951703 | -1126.409148 | 1.8 | 1.2 |
| 26   | -1126.951708 | -1126.409045 | 1.8 | 1.2 |
| 27   | -1126.953110 | -1126.409358 | 0.9 | 1.0 |
| 28   | -1126.951527 | -1126.408668 | 1.9 | 1.5 |
| 29   | -1126.951516 | -1126.408918 | 1.9 | 1.3 |
| 30   | -1126.952057 | -1126.407851 | 1.6 | 2.0 |
| 31   | -1126.951390 | -1126.406409 | 2.0 | 2.9 |
| 32   | -1126.952310 | -1126.407705 | 1.4 | 2.1 |
| 33   | -1126.951666 | -1126.409235 | 1.8 | 1.1 |
| 34   | -1126.949780 | -1126.406549 | 3.0 | 2.8 |
| 35   | -1126.951427 | -1126.406767 | 2.0 | 2.7 |
| 36   | -1126.951650 | -1126.408843 | 1.8 | 1.4 |
| 37   | -1126.951731 | -1126.407322 | 1.8 | 2.3 |
| 38   | -1126.952020 | -1126.407644 | 1.6 | 2.1 |
| 39   | -1126.951501 | -1126.409054 | 1.9 | 1.2 |
| 40   | -1126.951664 | -1126.409192 | 1.8 | 1.1 |
| 41   | -1126.951554 | -1126.407855 | 1.9 | 2.0 |
| 42   | -1126.951383 | -1126.407961 | 2.0 | 1.9 |
| 43   | -1126.951823 | -1126.408713 | 1.7 | 1.4 |
| 44   | -1126.951567 | -1126.407211 | 1.9 | 2.4 |
| Avg. | -1126.953158 | -1126.409714 |     |     |

**Table S57.** Conformational analysis for **6b<sup>†</sup>**.

| Conformer # | E            | G            | DE       | DG       |
|-------------|--------------|--------------|----------|----------|
|             | au           | au           | kcal/mol | kcal/mol |
| 1           | -1127.351993 | -1126.798273 | 0.0      | 0.0      |
| 2           | -1127.350850 | -1126.796072 | 0.7      | 1.4      |
| 3           | -1127.350470 | -1126.797383 | 1.0      | 0.6      |
| 4           | -1127.351076 | -1126.796578 | 0.6      | 1.1      |
| 5           | -1127.349955 | -1126.795258 | 1.3      | 1.9      |
| 6           | -1127.351209 | -1126.797303 | 0.5      | 0.6      |
| 7           | -1127.351010 | -1126.796764 | 0.6      | 0.9      |
| 8           | -1127.350998 | -1126.797155 | 0.6      | 0.7      |
| 9           | -1127.351179 | -1126.796943 | 0.5      | 0.8      |
| 10          | -1127.351197 | -1126.796830 | 0.5      | 0.9      |
| 11          | -1127.349842 | -1126.796339 | 1.3      | 1.2      |
| 12          | -1127.350493 | -1126.796954 | 0.9      | 0.8      |
| 13          | -1127.350796 | -1126.796643 | 0.8      | 1.0      |
| 14          | -1127.349591 | -1126.795628 | 1.5      | 1.7      |
| 15          | -1127.351109 | -1126.796439 | 0.6      | 1.2      |
| 16          | -1127.351632 | -1126.796320 | 0.2      | 1.2      |

|    |              |              |     |     |
|----|--------------|--------------|-----|-----|
| 17 | -1127.351481 | -1126.796726 | 0.3 | 1.0 |
| 18 | -1127.350787 | -1126.798101 | 0.8 | 0.1 |
| 19 | -1127.349662 | -1126.796129 | 1.5 | 1.3 |
| 20 | -1127.349144 | -1126.794792 | 1.8 | 2.2 |
| 21 | -1127.349633 | -1126.795860 | 1.5 | 1.5 |
| 22 | -1127.351362 | -1126.796785 | 0.4 | 0.9 |
| 23 | -1127.350268 | -1126.794922 | 1.1 | 2.1 |
| 24 | -1127.350001 | -1126.796535 | 1.2 | 1.1 |
| 25 | -1127.350147 | -1126.795382 | 1.2 | 1.8 |
| 26 | -1127.350729 | -1126.796430 | 0.8 | 1.2 |
| 27 | -1127.349822 | -1126.795222 | 1.4 | 1.9 |
| 28 | -1127.350838 | -1126.796275 | 0.7 | 1.3 |
| 29 | -1127.350195 | -1126.796182 | 1.1 | 1.3 |
| 30 | -1127.350097 | -1126.796546 | 1.2 | 1.1 |
| 31 | -1127.350107 | -1126.797326 | 1.2 | 0.6 |
| 32 | -1127.349579 | -1126.794551 | 1.5 | 2.3 |
| 33 | -1127.349702 | -1126.795391 | 1.4 | 1.8 |
| 34 | -1127.350711 | -1126.796057 | 0.8 | 1.4 |
| 35 | -1127.349645 | -1126.796045 | 1.5 | 1.4 |
| 36 | -1127.349558 | -1126.795429 | 1.5 | 1.8 |
| 37 | -1127.350076 | -1126.796282 | 1.2 | 1.2 |
| 38 | -1127.349990 | -1126.796568 | 1.3 | 1.1 |
| 39 | -1127.349289 | -1126.795474 | 1.7 | 1.8 |
| 40 | -1127.349749 | -1126.795971 | 1.4 | 1.4 |
| 41 | -1127.350070 | -1126.795624 | 1.2 | 1.7 |
| 42 | -1127.350055 | -1126.795988 | 1.2 | 1.4 |
| 43 | -1127.350688 | -1126.797070 | 0.8 | 0.8 |
| 44 | -1127.350673 | -1126.795616 | 0.8 | 1.7 |
| 45 | -1127.349485 | -1126.796076 | 1.6 | 1.4 |
| 46 | -1127.349992 | -1126.796530 | 1.3 | 1.1 |
| 47 | -1127.350466 | -1126.795782 | 1.0 | 1.6 |
| 48 | -1127.350342 | -1126.797253 | 1.0 | 0.6 |
| 49 | -1127.350569 | -1126.796390 | 0.9 | 1.2 |
| 50 | -1127.349776 | -1126.794950 | 1.4 | 2.1 |
| 51 | -1127.350352 | -1126.795807 | 1.0 | 1.5 |
| 52 | -1127.350140 | -1126.796328 | 1.2 | 1.2 |
| 53 | -1127.349177 | -1126.795514 | 1.8 | 1.7 |
| 54 | -1127.349667 | -1126.795548 | 1.5 | 1.7 |
| 55 | -1127.349376 | -1126.794556 | 1.6 | 2.3 |
| 56 | -1127.350493 | -1126.795587 | 0.9 | 1.7 |
| 57 | -1127.349085 | -1126.795224 | 1.8 | 1.9 |
| 58 | -1127.349198 | -1126.795934 | 1.8 | 1.5 |
| 59 | -1127.349780 | -1126.795602 | 1.4 | 1.7 |
| 60 | -1127.349778 | -1126.795180 | 1.4 | 1.9 |
| 61 | -1127.350819 | -1126.796481 | 0.7 | 1.1 |

|     |              |              |     |     |
|-----|--------------|--------------|-----|-----|
| 62  | -1127.349760 | -1126.796837 | 1.4 | 0.9 |
| 63  | -1127.349176 | -1126.794463 | 1.8 | 2.4 |
| 64  | -1127.349323 | -1126.794562 | 1.7 | 2.3 |
| 65  | -1127.349125 | -1126.794359 | 1.8 | 2.5 |
| 66  | -1127.348975 | -1126.793871 | 1.9 | 2.8 |
| 67  | -1127.350364 | -1126.797822 | 1.0 | 0.3 |
| 68  | -1127.349152 | -1126.795310 | 1.8 | 1.9 |
| 69  | -1127.350612 | -1126.795979 | 0.9 | 1.4 |
| 70  | -1127.349305 | -1126.794810 | 1.7 | 2.2 |
| 71  | -1127.349474 | -1126.796186 | 1.6 | 1.3 |
| 72  | -1127.349559 | -1126.797157 | 1.5 | 0.7 |
| 73  | -1127.349534 | -1126.795781 | 1.5 | 1.6 |
| 74  | -1127.349078 | -1126.795704 | 1.8 | 1.6 |
| 75  | -1127.349432 | -1126.796736 | 1.6 | 1.0 |
| 76  | -1127.349356 | -1126.795254 | 1.7 | 1.9 |
| 77  | -1127.349235 | -1126.795855 | 1.7 | 1.5 |
| 78  | -1127.349901 | -1126.795522 | 1.3 | 1.7 |
| 79  | -1127.349641 | -1126.796288 | 1.5 | 1.2 |
| 80  | -1127.349102 | -1126.795530 | 1.8 | 1.7 |
| 81  | -1127.350397 | -1126.797461 | 1.0 | 0.5 |
| 82  | -1127.348966 | -1126.795944 | 1.9 | 1.5 |
| 83  | -1127.348847 | -1126.795427 | 2.0 | 1.8 |
| 84  | -1127.349194 | -1126.794586 | 1.8 | 2.3 |
| 85  | -1127.348922 | -1126.795929 | 1.9 | 1.5 |
| 86  | -1127.349403 | -1126.795040 | 1.6 | 2.0 |
| 87  | -1127.350273 | -1126.794556 | 1.1 | 2.3 |
| 88  | -1127.349351 | -1126.796395 | 1.7 | 1.2 |
| 89  | -1127.349136 | -1126.795209 | 1.8 | 1.9 |
| 90  | -1127.348957 | -1126.795286 | 1.9 | 1.9 |
| 91  | -1127.349120 | -1126.794339 | 1.8 | 2.5 |
| 92  | -1127.350034 | -1126.795324 | 1.2 | 1.9 |
| 93  | -1127.350102 | -1126.795099 | 1.2 | 2.0 |
| 94  | -1127.349547 | -1126.796168 | 1.5 | 1.3 |
| 95  | -1127.349095 | -1126.794511 | 1.8 | 2.4 |
| 96  | -1127.349262 | -1126.796058 | 1.7 | 1.4 |
| 97  | -1127.348952 | -1126.794217 | 1.9 | 2.5 |
| 98  | -1127.349252 | -1126.795459 | 1.7 | 1.8 |
| 99  | -1127.349477 | -1126.795385 | 1.6 | 1.8 |
| 100 | -1127.348820 | -1126.793899 | 2.0 | 2.7 |
| 101 | -1127.349036 | -1126.794338 | 1.9 | 2.5 |
| 102 | -1127.349104 | -1126.795835 | 1.8 | 1.5 |
| 103 | -1127.349353 | -1126.796224 | 1.7 | 1.3 |
| 104 | -1127.349723 | -1126.794653 | 1.4 | 2.3 |
| 105 | -1127.349685 | -1126.795785 | 1.4 | 1.6 |
| 106 | -1127.348987 | -1126.793659 | 1.9 | 2.9 |

|      |              |              |  |  |
|------|--------------|--------------|--|--|
| Avg. | -1127.350541 | -1126.796757 |  |  |
|------|--------------|--------------|--|--|

**Table S58.** Conformational analysis for **6b**.

| Conformer # | E            | G            | DE       | DG       |
|-------------|--------------|--------------|----------|----------|
|             | au           | au           | kcal/mol | kcal/mol |
| 1           | -1126.937573 | -1126.393509 | 0.0      | 0.0      |
| 2           | -1126.937289 | -1126.392590 | 0.2      | 0.6      |
| 3           | -1126.937030 | -1126.392480 | 0.4      | 0.6      |
| 4           | -1126.936672 | -1126.392109 | 0.6      | 0.9      |
| 5           | -1126.936568 | -1126.392219 | 0.7      | 0.8      |
| 6           | -1126.936848 | -1126.392200 | 0.5      | 0.8      |
| 7           | -1126.937645 | -1126.393450 | 0.0      | 0.0      |
| 8           | -1126.936528 | -1126.392631 | 0.7      | 0.6      |
| 9           | -1126.937347 | -1126.391800 | 0.2      | 1.1      |
| 10          | -1126.936424 | -1126.391467 | 0.8      | 1.3      |
| 11          | -1126.934813 | -1126.390862 | 1.8      | 1.7      |
| 12          | -1126.936428 | -1126.391174 | 0.8      | 1.5      |
| 13          | -1126.934933 | -1126.390866 | 1.7      | 1.7      |
| 14          | -1126.935630 | -1126.391322 | 1.3      | 1.4      |
| 15          | -1126.935319 | -1126.390803 | 1.5      | 1.7      |
| 16          | -1126.935657 | -1126.391434 | 1.2      | 1.3      |
| 17          | -1126.934501 | -1126.389084 | 2.0      | 2.8      |
| 18          | -1126.935463 | -1126.390660 | 1.4      | 1.8      |
| 19          | -1126.935976 | -1126.390695 | 1.0      | 1.8      |
| 20          | -1126.935300 | -1126.390326 | 1.5      | 2.0      |
| 21          | -1126.934571 | -1126.389580 | 1.9      | 2.5      |
| 22          | -1126.934893 | -1126.390122 | 1.7      | 2.1      |
| 23          | -1126.935633 | -1126.389758 | 1.3      | 2.4      |
| 24          | -1126.936446 | -1126.391448 | 0.8      | 1.3      |
| 25          | -1126.936647 | -1126.390367 | 0.6      | 2.0      |
| 26          | -1126.935178 | -1126.389203 | 1.5      | 2.7      |
| 27          | -1126.935420 | -1126.390513 | 1.4      | 1.9      |
| 28          | -1126.934611 | -1126.389401 | 1.9      | 2.6      |
| 29          | -1126.934645 | -1126.389212 | 1.9      | 2.7      |
| 30          | -1126.935443 | -1126.390008 | 1.4      | 2.2      |
| 31          | -1126.935300 | -1126.389983 | 1.5      | 2.2      |
| 32          | -1126.934835 | -1126.390195 | 1.8      | 2.1      |
| 33          | -1126.934656 | -1126.389822 | 1.9      | 2.3      |
| 34          | -1126.934506 | -1126.390237 | 2.0      | 2.1      |
| 35          | -1126.934543 | -1126.388612 | 1.9      | 3.1      |
| Avg.        | -1126.936728 | -1126.392441 |          |          |

**Table S59.** Conformational analysis for **3bf<sup>‡</sup>**.

| Conformer # | E            | G            | DE       | DG       |
|-------------|--------------|--------------|----------|----------|
|             | au           | au           | kcal/mol | kcal/mol |
| 1           | -1166.652315 | -1166.070981 | 1.6      | 3.1      |
| 2           | -1166.651978 | -1166.069466 | 1.8      | 4.1      |
| 3           | -1166.654674 | -1166.072561 | 0.2      | 2.1      |
| 4           | -1166.654152 | -1166.073140 | 0.5      | 1.8      |
| 5           | -1166.654312 | -1166.072017 | 0.4      | 2.5      |
| 6           | -1166.653317 | -1166.070337 | 1.0      | 3.5      |
| 7           | -1166.653575 | -1166.072302 | 0.8      | 2.3      |
| 8           | -1166.653260 | -1166.072870 | 1.0      | 1.9      |
| 9           | -1166.653250 | -1166.071469 | 1.0      | 2.8      |
| 10          | -1166.653355 | -1166.072156 | 1.0      | 2.4      |
| 11          | -1166.653253 | -1166.072027 | 1.0      | 2.5      |
| 12          | -1166.652528 | -1166.072135 | 1.5      | 2.4      |
| 13          | -1166.652488 | -1166.072307 | 1.5      | 2.3      |
| 14          | -1166.654597 | -1166.071962 | 0.2      | 2.5      |
| 15          | -1166.652687 | -1166.071713 | 1.4      | 2.7      |
| 16          | -1166.654149 | -1166.071309 | 0.5      | 2.9      |
| 17          | -1166.652284 | -1166.071192 | 1.7      | 3.0      |
| 18          | -1166.652953 | -1166.070564 | 1.2      | 3.4      |
| 19          | -1166.652606 | -1166.071598 | 1.5      | 2.7      |
| 20          | -1166.654923 | -1166.075940 | 0.0      | 0.0      |
| 21          | -1166.652661 | -1166.071188 | 1.4      | 3.0      |
| 22          | -1166.652568 | -1166.071288 | 1.5      | 2.9      |
| 23          | -1166.652585 | -1166.071566 | 1.5      | 2.7      |
| 24          | -1166.652370 | -1166.071589 | 1.6      | 2.7      |
| 25          | -1166.652424 | -1166.071108 | 1.6      | 3.0      |
| 26          | -1166.652081 | -1166.072599 | 1.8      | 2.1      |
| 27          | -1166.652919 | -1166.070720 | 1.3      | 3.3      |
| 28          | -1166.653473 | -1166.070947 | 0.9      | 3.1      |
| 29          | -1166.652116 | -1166.073110 | 1.8      | 1.8      |
| 30          | -1166.651808 | -1166.071173 | 2.0      | 3.0      |
| 31          | -1166.654029 | -1166.073359 | 0.6      | 1.6      |
| 32          | -1166.652618 | -1166.072052 | 1.4      | 2.4      |
| 33          | -1166.652452 | -1166.071383 | 1.6      | 2.9      |
| 34          | -1166.652090 | -1166.071457 | 1.8      | 2.8      |
| 35          | -1166.652071 | -1166.070807 | 1.8      | 3.2      |
| 36          | -1166.652433 | -1166.071906 | 1.6      | 2.5      |
| 37          | -1166.652139 | -1166.072157 | 1.7      | 2.4      |
| 38          | -1166.652351 | -1166.071617 | 1.6      | 2.7      |
| 39          | -1166.652406 | -1166.070277 | 1.6      | 3.6      |
| 40          | -1166.653249 | -1166.072835 | 1.1      | 1.9      |
| 41          | -1166.654004 | -1166.074030 | 0.6      | 1.2      |
| 42          | -1166.652545 | -1166.071600 | 1.5      | 2.7      |

|      |              |              |     |     |
|------|--------------|--------------|-----|-----|
| 43   | -1166.654893 | -1166.074431 | 0.0 | 0.9 |
| 44   | -1166.653010 | -1166.070422 | 1.2 | 3.5 |
| 45   | -1166.653929 | -1166.074792 | 0.6 | 0.7 |
| 46   | -1166.652621 | -1166.069731 | 1.4 | 3.9 |
| 47   | -1166.653818 | -1166.073393 | 0.7 | 1.6 |
| 48   | -1166.652029 | -1166.071561 | 1.8 | 2.7 |
| 49   | -1166.654328 | -1166.073919 | 0.4 | 1.3 |
| 50   | -1166.653865 | -1166.073580 | 0.7 | 1.5 |
| 51   | -1166.652418 | -1166.070594 | 1.6 | 3.4 |
| 52   | -1166.652898 | -1166.070878 | 1.3 | 3.2 |
| 53   | -1166.652507 | -1166.072270 | 1.5 | 2.3 |
| 54   | -1166.653197 | -1166.073763 | 1.1 | 1.4 |
| 55   | -1166.651815 | -1166.070005 | 2.0 | 3.7 |
| Avg. | -1166.653854 | -1166.074378 |     |     |

**Table S60.** Conformational analysis for **3bf**.

| Conformer # | E            | G            | DE       | DG       |
|-------------|--------------|--------------|----------|----------|
|             | au           | au           | kcal/mol | kcal/mol |
| 1           | -1166.248655 | -1165.677740 | 1.0      | 1.8      |
| 2           | -1166.248731 | -1165.677768 | 0.9      | 1.8      |
| 3           | -1166.250051 | -1165.679529 | 0.1      | 0.7      |
| 4           | -1166.250218 | -1165.679129 | 0.0      | 0.9      |
| 5           | -1166.248099 | -1165.677103 | 1.3      | 2.2      |
| 6           | -1166.249938 | -1165.679838 | 0.2      | 0.5      |
| 7           | -1166.248970 | -1165.680482 | 0.8      | 0.1      |
| 8           | -1166.248956 | -1165.680260 | 0.8      | 0.2      |
| 9           | -1166.249119 | -1165.679356 | 0.7      | 0.8      |
| 10          | -1166.248973 | -1165.680430 | 0.8      | 0.1      |
| 11          | -1166.248789 | -1165.679167 | 0.9      | 0.9      |
| 12          | -1166.249116 | -1165.678999 | 0.7      | 1.0      |
| 13          | -1166.248969 | -1165.680570 | 0.8      | 0.0      |
| 14          | -1166.250005 | -1165.679165 | 0.1      | 0.9      |
| 15          | -1166.249597 | -1165.678148 | 0.4      | 1.5      |
| 16          | -1166.248356 | -1165.678747 | 1.2      | 1.1      |
| 17          | -1166.248325 | -1165.680049 | 1.2      | 0.3      |
| 18          | -1166.249190 | -1165.678418 | 0.6      | 1.4      |
| 19          | -1166.249465 | -1165.677726 | 0.5      | 1.8      |
| 20          | -1166.248272 | -1165.678607 | 1.2      | 1.2      |
| 21          | -1166.248259 | -1165.678741 | 1.2      | 1.1      |
| 22          | -1166.248397 | -1165.679365 | 1.1      | 0.8      |
| 23          | -1166.249177 | -1165.678658 | 0.7      | 1.2      |
| 24          | -1166.247174 | -1165.675813 | 1.9      | 3.0      |
| 25          | -1166.248015 | -1165.678697 | 1.4      | 1.2      |
| 26          | -1166.247839 | -1165.678339 | 1.5      | 1.4      |



|    |              |              |     |     |
|----|--------------|--------------|-----|-----|
| 27 | -1166.248062 | -1165.677280 | 1.4 | 2.1 |
| 28 | -1166.248009 | -1165.678889 | 1.4 | 1.1 |
| 29 | -1166.247522 | -1165.676720 | 1.7 | 2.4 |
| 30 | -1166.248008 | -1165.678920 | 1.4 | 1.0 |
| 31 | -1166.247972 | -1165.678961 | 1.4 | 1.0 |
| 32 | -1166.249455 | -1165.677675 | 0.5 | 1.8 |
| 33 | -1166.247771 | -1165.678215 | 1.5 | 1.5 |
| 34 | -1166.247839 | -1165.678488 | 1.5 | 1.3 |
| 35 | -1166.247398 | -1165.676860 | 1.8 | 2.3 |
| 36 | -1166.248237 | -1165.677470 | 1.2 | 1.9 |
| 37 | -1166.248231 | -1165.677801 | 1.2 | 1.7 |
| 38 | -1166.247743 | -1165.675519 | 1.6 | 3.2 |
| 39 | -1166.249002 | -1165.680261 | 0.8 | 0.2 |
| 40 | -1166.247572 | -1165.678205 | 1.7 | 1.5 |
| 41 | -1166.247625 | -1165.678425 | 1.6 | 1.3 |
| 42 | -1166.247816 | -1165.678397 | 1.5 | 1.4 |
| 43 | -1166.247770 | -1165.678620 | 1.5 | 1.2 |
| 44 | -1166.247127 | -1165.676325 | 1.9 | 2.7 |
| 45 | -1166.248302 | -1165.679748 | 1.2 | 0.5 |
| 46 | -1166.247960 | -1165.678473 | 1.4 | 1.3 |
| 47 | -1166.248036 | -1165.679195 | 1.4 | 0.9 |
| 48 | -1166.247528 | -1165.678637 | 1.7 | 1.2 |
| 49 | -1166.247591 | -1165.676408 | 1.6 | 2.6 |
| 50 | -1166.247096 | -1165.677103 | 2.0 | 2.2 |
| 51 | -1166.248009 | -1165.678890 | 1.4 | 1.1 |
| 52 | -1166.247360 | -1165.678822 | 1.8 | 1.1 |
| 53 | -1166.248052 | -1165.676803 | 1.4 | 2.4 |
| 54 | -1166.248009 | -1165.678967 | 1.4 | 1.0 |
| 55 | -1166.247627 | -1165.679060 | 1.6 | 0.9 |
| 56 | -1166.247441 | -1165.675909 | 1.7 | 2.9 |
| 57 | -1166.248026 | -1165.676521 | 1.4 | 2.5 |
| 58 | -1166.247404 | -1165.677732 | 1.8 | 1.8 |
| 59 | -1166.247147 | -1165.677786 | 1.9 | 1.7 |
| 60 | -1166.247127 | -1165.677468 | 1.9 | 1.9 |
| 61 | -1166.247403 | -1165.679039 | 1.8 | 1.0 |
| 62 | -1166.247128 | -1165.677653 | 1.9 | 1.8 |
| 63 | -1166.247982 | -1165.679330 | 1.4 | 0.8 |
| 64 | -1166.248269 | -1165.678622 | 1.2 | 1.2 |
| 65 | -1166.247101 | -1165.677492 | 2.0 | 1.9 |
| 66 | -1166.247881 | -1165.677301 | 1.5 | 2.1 |
| 67 | -1166.247795 | -1165.678164 | 1.5 | 1.5 |
| 68 | -1166.247669 | -1165.678014 | 1.6 | 1.6 |
| 69 | -1166.247032 | -1165.678973 | 2.0 | 1.0 |
| 70 | -1166.247051 | -1165.677983 | 2.0 | 1.6 |
| 71 | -1166.247755 | -1165.678542 | 1.5 | 1.3 |

|      |              |              |     |     |
|------|--------------|--------------|-----|-----|
| 72   | -1166.247386 | -1165.677572 | 1.8 | 1.9 |
| 73   | -1166.247626 | -1165.678084 | 1.6 | 1.6 |
| 74   | -1166.247664 | -1165.677274 | 1.6 | 2.1 |
| 75   | -1166.247101 | -1165.676746 | 2.0 | 2.4 |
| 76   | -1166.247132 | -1165.674821 | 1.9 | 3.6 |
| 77   | -1166.247643 | -1165.678595 | 1.6 | 1.2 |
| 78   | -1166.247884 | -1165.678094 | 1.5 | 1.6 |
| 79   | -1166.247685 | -1165.678246 | 1.6 | 1.5 |
| 80   | -1166.248315 | -1165.675624 | 1.2 | 3.1 |
| 81   | -1166.247163 | -1165.677111 | 1.9 | 2.2 |
| 82   | -1166.247872 | -1165.675808 | 1.5 | 3.0 |
| 83   | -1166.247285 | -1165.674947 | 1.8 | 3.5 |
| 84   | -1166.247192 | -1165.676809 | 1.9 | 2.4 |
| 85   | -1166.248728 | -1165.675764 | 0.9 | 3.0 |
| Avg. | -1166.248897 | -1165.679380 |     |     |

**Table S61.** Conformational analysis for **6bf<sup>‡</sup>**.

| Conformer # | E            | G            | DE       | DG       |
|-------------|--------------|--------------|----------|----------|
|             | au           | au           | kcal/mol | kcal/mol |
| 1           | -1166.651170 | -1166.068813 | 0.3      | 1.6      |
| 2           | -1166.651603 | -1166.069689 | 0.0      | 1.1      |
| 3           | -1166.648900 | -1166.065119 | 1.7      | 4.0      |
| 4           | -1166.650413 | -1166.069149 | 0.7      | 1.4      |
| 5           | -1166.651124 | -1166.070573 | 0.3      | 0.5      |
| 6           | -1166.650518 | -1166.070061 | 0.7      | 0.9      |
| 7           | -1166.650479 | -1166.069643 | 0.7      | 1.1      |
| 8           | -1166.650391 | -1166.068176 | 0.8      | 2.0      |
| 9           | -1166.651396 | -1166.071438 | 0.1      | 0.0      |
| 10          | -1166.650354 | -1166.068887 | 0.8      | 1.6      |
| 11          | -1166.648846 | -1166.067215 | 1.7      | 2.6      |
| 12          | -1166.649521 | -1166.067793 | 1.3      | 2.3      |
| 13          | -1166.650535 | -1166.069466 | 0.7      | 1.2      |
| 14          | -1166.650562 | -1166.069691 | 0.7      | 1.1      |
| 15          | -1166.650200 | -1166.069016 | 0.9      | 1.5      |
| 16          | -1166.649968 | -1166.068776 | 1.0      | 1.7      |
| 17          | -1166.650392 | -1166.070269 | 0.8      | 0.7      |
| 18          | -1166.650349 | -1166.069966 | 0.8      | 0.9      |
| 19          | -1166.650262 | -1166.069340 | 0.8      | 1.3      |
| 20          | -1166.650262 | -1166.069398 | 0.8      | 1.3      |
| 21          | -1166.650275 | -1166.068890 | 0.8      | 1.6      |
| 22          | -1166.649956 | -1166.069014 | 1.0      | 1.5      |
| 23          | -1166.649180 | -1166.070060 | 1.5      | 0.9      |
| 24          | -1166.649254 | -1166.068735 | 1.5      | 1.7      |
| 25          | -1166.650292 | -1166.069604 | 0.8      | 1.2      |
| 26          | -1166.650430 | -1166.068614 | 0.7      | 1.8      |

|    |              |              |     |     |
|----|--------------|--------------|-----|-----|
| 27 | -1166.650274 | -1166.071168 | 0.8 | 0.2 |
| 28 | -1166.649354 | -1166.069890 | 1.4 | 1.0 |
| 29 | -1166.650642 | -1166.070230 | 0.6 | 0.8 |
| 30 | -1166.649173 | -1166.069231 | 1.5 | 1.4 |
| 31 | -1166.650223 | -1166.069875 | 0.9 | 1.0 |
| 32 | -1166.649213 | -1166.069036 | 1.5 | 1.5 |
| 33 | -1166.650517 | -1166.068885 | 0.7 | 1.6 |
| 34 | -1166.648844 | -1166.066052 | 1.7 | 3.4 |
| 35 | -1166.649846 | -1166.067844 | 1.1 | 2.3 |
| 36 | -1166.649705 | -1166.069493 | 1.2 | 1.2 |
| 37 | -1166.649257 | -1166.068555 | 1.5 | 1.8 |
| 38 | -1166.649356 | -1166.067586 | 1.4 | 2.4 |
| 39 | -1166.648876 | -1166.065263 | 1.7 | 3.9 |
| 40 | -1166.649435 | -1166.068751 | 1.4 | 1.7 |
| 41 | -1166.649474 | -1166.067496 | 1.3 | 2.5 |
| 42 | -1166.649488 | -1166.068640 | 1.3 | 1.8 |
| 43 | -1166.649383 | -1166.068402 | 1.4 | 1.9 |
| 44 | -1166.650954 | -1166.069712 | 0.4 | 1.1 |
| 45 | -1166.649424 | -1166.069700 | 1.4 | 1.1 |
| 46 | -1166.648698 | -1166.067225 | 1.8 | 2.6 |
| 47 | -1166.649425 | -1166.069203 | 1.4 | 1.4 |
| 48 | -1166.650130 | -1166.068457 | 0.9 | 1.9 |
| 49 | -1166.649270 | -1166.069666 | 1.5 | 1.1 |
| 50 | -1166.649659 | -1166.069082 | 1.2 | 1.5 |
| 51 | -1166.649308 | -1166.069167 | 1.4 | 1.4 |
| 52 | -1166.649044 | -1166.069148 | 1.6 | 1.4 |
| 53 | -1166.649304 | -1166.069931 | 1.4 | 0.9 |
| 54 | -1166.649950 | -1166.066875 | 1.0 | 2.9 |
| 55 | -1166.649922 | -1166.067328 | 1.1 | 2.6 |
| 56 | -1166.650015 | -1166.068911 | 1.0 | 1.6 |
| 57 | -1166.650079 | -1166.069171 | 1.0 | 1.4 |
| 58 | -1166.648723 | -1166.067370 | 1.8 | 2.6 |
| 59 | -1166.648803 | -1166.067363 | 1.8 | 2.6 |
| 60 | -1166.648694 | -1166.066713 | 1.8 | 3.0 |
| 61 | -1166.648826 | -1166.067334 | 1.7 | 2.6 |
| 62 | -1166.649207 | -1166.069758 | 1.5 | 1.1 |
| 63 | -1166.649239 | -1166.068912 | 1.5 | 1.6 |
| 64 | -1166.649120 | -1166.068200 | 1.6 | 2.0 |
| 65 | -1166.649797 | -1166.069535 | 1.1 | 1.2 |
| 66 | -1166.650170 | -1166.067833 | 0.9 | 2.3 |
| 67 | -1166.649229 | -1166.069321 | 1.5 | 1.3 |
| 68 | -1166.649223 | -1166.068194 | 1.5 | 2.0 |
| 69 | -1166.650165 | -1166.067930 | 0.9 | 2.2 |
| 70 | -1166.649517 | -1166.067319 | 1.3 | 2.6 |
| 71 | -1166.648437 | -1166.066083 | 2.0 | 3.4 |

|      |              |              |     |     |
|------|--------------|--------------|-----|-----|
| 72   | -1166.649712 | -1166.068209 | 1.2 | 2.0 |
| 73   | -1166.648564 | -1166.068188 | 1.9 | 2.0 |
| 74   | -1166.649339 | -1166.068443 | 1.4 | 1.9 |
| 75   | -1166.649325 | -1166.068208 | 1.4 | 2.0 |
| 76   | -1166.648741 | -1166.065868 | 1.8 | 3.5 |
| 77   | -1166.649836 | -1166.068017 | 1.1 | 2.1 |
| Avg. | -1166.650305 | -1166.069880 |     |     |

**Table S62.** Conformational analysis for **6bf**.

| Conformer # | E            | G            | DE       | DG       |
|-------------|--------------|--------------|----------|----------|
|             | au           | au           | kcal/mol | kcal/mol |
| 1           | -1166.232884 | -1165.661685 | 0.0      | 0.0      |
| 2           | -1166.232359 | -1165.660518 | 0.3      | 0.7      |
| 3           | -1166.232322 | -1165.660381 | 0.4      | 0.8      |
| 4           | -1166.230007 | -1165.658169 | 1.8      | 2.2      |
| 5           | -1166.230066 | -1165.657569 | 1.8      | 2.6      |
| 6           | -1166.232005 | -1165.660407 | 0.6      | 0.8      |
| 7           | -1166.231738 | -1165.659924 | 0.7      | 1.1      |
| 8           | -1166.231816 | -1165.659861 | 0.7      | 1.1      |
| 9           | -1166.232347 | -1165.660413 | 0.3      | 0.8      |
| 10          | -1166.232506 | -1165.659854 | 0.2      | 1.1      |
| 11          | -1166.231733 | -1165.659409 | 0.7      | 1.4      |
| 12          | -1166.230967 | -1165.658837 | 1.2      | 1.8      |
| 13          | -1166.230805 | -1165.658761 | 1.3      | 1.8      |
| 14          | -1166.231850 | -1165.659960 | 0.6      | 1.1      |
| 15          | -1166.231125 | -1165.659116 | 1.1      | 1.6      |
| 16          | -1166.231053 | -1165.659027 | 1.1      | 1.7      |
| 17          | -1166.229962 | -1165.658855 | 1.8      | 1.8      |
| 18          | -1166.230374 | -1165.658353 | 1.6      | 2.1      |
| 19          | -1166.231043 | -1165.658200 | 1.2      | 2.2      |
| 20          | -1166.231681 | -1165.659420 | 0.8      | 1.4      |
| 21          | -1166.230003 | -1165.657632 | 1.8      | 2.5      |
| 22          | -1166.231131 | -1165.659095 | 1.1      | 1.6      |
| Avg.        | -1166.232023 | -1165.660437 |          |          |

**Table S63.** Coordinates for global minimum of **3ac<sup>‡</sup>**.

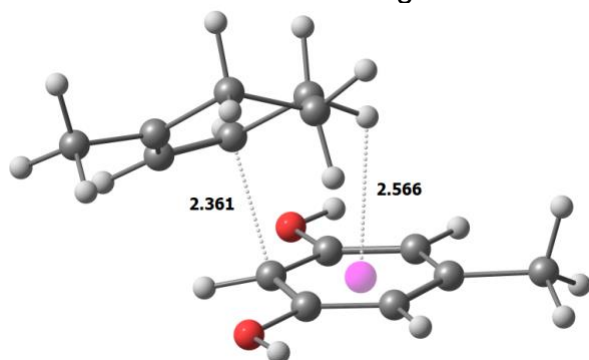

|   |           |           |           |
|---|-----------|-----------|-----------|
| C | -0.863091 | -1.100226 | -0.642569 |
| C | -2.039228 | -1.042961 | 0.125538  |
| C | -2.981620 | -0.069673 | -0.084443 |
| C | -4.284300 | -0.095353 | 0.622242  |
| H | -4.363377 | 0.800561  | 1.254214  |
| H | -5.108730 | -0.025381 | -0.098935 |
| H | -4.408665 | -0.984457 | 1.243106  |
| C | -2.771506 | 0.999967  | -1.103155 |
| C | -1.299324 | 1.245386  | -1.415796 |
| H | -0.834203 | 1.760279  | -0.568476 |
| H | -1.200746 | 1.901816  | -2.285390 |
| C | -0.569446 | -0.070767 | -1.668163 |
| H | 0.513783  | 0.071659  | -1.771695 |
| H | -3.313816 | 0.675146  | -2.008391 |
| H | -3.271885 | 1.920182  | -0.778645 |
| H | -2.243785 | -1.840973 | 0.834911  |
| H | -0.381098 | -2.068123 | -0.755195 |
| C | 0.634556  | 0.457092  | 1.326800  |
| C | 0.775812  | -0.918174 | 1.046706  |
| C | 1.888096  | -1.332887 | 0.281185  |
| C | 2.746771  | -0.406629 | -0.286886 |
| C | 2.547194  | 0.962407  | -0.050156 |
| C | 1.494585  | 1.392048  | 0.761965  |
| H | 1.354696  | 2.451476  | 0.962676  |
| C | 3.457113  | 1.966102  | -0.691981 |
| H | 3.105708  | 2.190363  | -1.707218 |
| H | 4.475658  | 1.577696  | -0.778166 |
| H | 3.580299  | -0.738010 | -0.901443 |
| O | 2.015209  | -2.668894 | 0.112124  |
| H | 2.774926  | -2.860377 | -0.456979 |
| H | 0.222420  | -1.648090 | 1.627941  |
| O | -0.392511 | 0.788880  | 2.136248  |
| H | -0.435093 | 1.750766  | 2.244333  |
| H | 3.474127  | 2.904260  | -0.131882 |
| H | -0.890379 | -0.516206 | -2.627794 |

**Table S64.** Coordinates for global minimum of **3ac**.

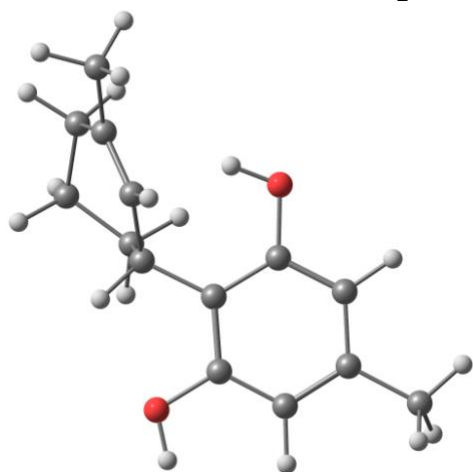

|   |           |           |           |
|---|-----------|-----------|-----------|
| C | -0.858487 | -0.792503 | 0.206676  |
| C | -1.759396 | 0.184457  | 0.932315  |
| C | -2.990943 | 0.531635  | 0.529473  |
| C | -3.822641 | 1.527781  | 1.281158  |
| H | -4.135741 | 2.344313  | 0.617159  |
| H | -3.279271 | 1.954806  | 2.128675  |
| H | -4.742433 | 1.058097  | 1.652773  |
| C | -3.617103 | -0.062584 | -0.706643 |
| C | -2.902183 | -1.330556 | -1.173482 |
| C | -1.392715 | -1.106303 | -1.204744 |
| H | -0.867481 | -1.983692 | -1.599403 |
| H | -1.163804 | -0.265717 | -1.875089 |
| H | -3.267970 | -1.628572 | -2.162848 |
| H | -3.131658 | -2.152685 | -0.481470 |
| H | -4.676580 | -0.268366 | -0.501438 |
| H | -3.611539 | 0.695167  | -1.506167 |
| H | -1.362571 | 0.614398  | 1.854092  |
| H | -0.861481 | -1.727488 | 0.782766  |
| C | 0.578925  | -0.314265 | 0.147029  |
| C | 1.646239  | -1.188657 | 0.402172  |
| C | 2.976231  | -0.785432 | 0.300740  |
| C | 3.284330  | 0.524017  | -0.074829 |
| C | 2.246573  | 1.413003  | -0.335171 |
| C | 0.917574  | 0.994678  | -0.229080 |
| O | -0.035219 | 1.929060  | -0.529783 |
| H | -0.909812 | 1.597758  | -0.244220 |
| H | 2.450213  | 2.440216  | -0.624354 |
| C | 4.720969  | 0.954828  | -0.204548 |
| H | 5.299824  | 0.667277  | 0.679896  |
| H | 5.193925  | 0.475698  | -1.070368 |
| H | 4.799697  | 2.037582  | -0.333192 |
| H | 3.771899  | -1.497571 | 0.512175  |
| O | 1.325048  | -2.475215 | 0.752048  |

H 2.139748 -2.971714 0.905455

**Table S65.** Coordinates for global minimum of **6ac<sup>‡</sup>**.

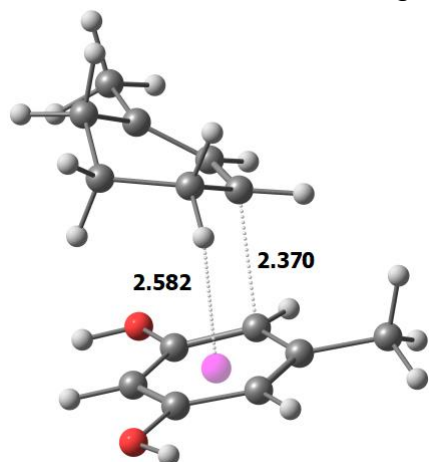

|   |           |           |           |
|---|-----------|-----------|-----------|
| C | 0.882471  | 1.131521  | -0.718120 |
| C | 2.036798  | 1.064192  | 0.081847  |
| C | 2.960495  | 0.065167  | -0.080898 |
| C | 4.241843  | 0.070920  | 0.665115  |
| H | 4.368190  | 0.966553  | 1.276271  |
| H | 4.280585  | -0.816124 | 1.313143  |
| H | 5.086571  | -0.028902 | -0.028605 |
| C | 2.753962  | -1.016504 | -1.088440 |
| C | 1.284579  | -1.239754 | -1.430598 |
| H | 0.791464  | -1.730864 | -0.585014 |
| H | 1.193325  | -1.910259 | -2.290276 |
| C | 0.582808  | 0.083960  | -1.722676 |
| H | -0.503086 | -0.042335 | -1.831431 |
| H | 3.322725  | -0.716976 | -1.986014 |
| H | 3.227769  | -1.941407 | -0.738433 |
| H | 2.240454  | 1.871911  | 0.780436  |
| H | 0.437168  | 2.109941  | -0.872332 |
| C | -2.468961 | -1.009925 | -0.007457 |
| C | -1.410347 | -1.336191 | 0.838711  |
| C | -0.609113 | -0.310233 | 1.317426  |
| C | -0.825173 | 1.030670  | 0.921669  |
| C | -1.950691 | 1.346552  | 0.122563  |
| C | -2.744305 | 0.325298  | -0.362465 |
| H | -3.598160 | 0.544057  | -0.999763 |
| C | -2.229663 | 2.775285  | -0.234888 |
| H | -1.955108 | 3.448520  | 0.582029  |
| H | -3.284311 | 2.921062  | -0.480180 |
| H | -0.302527 | 1.818553  | 1.455055  |
| O | 0.424342  | -0.523042 | 2.156370  |
| H | 0.523568  | -1.470059 | 2.336886  |
| H | -1.236903 | -2.370909 | 1.120599  |

|   |           |           |           |
|---|-----------|-----------|-----------|
| O | -3.225079 | -2.033039 | -0.454617 |
| H | -3.939545 | -1.701018 | -1.017845 |
| H | -1.645163 | 3.072632  | -1.116275 |
| H | 0.916101  | 0.498320  | -2.691543 |

**Table S66.** Coordinates for global minimum of **6ac**.

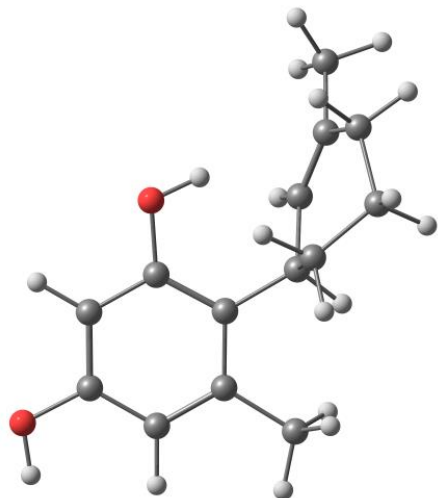

|   |           |           |           |
|---|-----------|-----------|-----------|
| C | 0.868581  | 0.804710  | 0.198510  |
| C | 1.767023  | -0.161278 | 0.942669  |
| C | 2.996785  | -0.522039 | 0.545791  |
| C | 3.825369  | -1.505934 | 1.316649  |
| H | 4.136902  | -2.335893 | 0.668799  |
| H | 3.280647  | -1.914943 | 2.172106  |
| H | 4.746244  | -1.031403 | 1.679333  |
| C | 3.623419  | 0.043367  | -0.703654 |
| C | 2.913552  | 1.304494  | -1.195701 |
| C | 1.402969  | 1.086492  | -1.219456 |
| H | 0.881217  | 1.957866  | -1.632289 |
| H | 1.168281  | 0.234118  | -1.872432 |
| H | 3.279705  | 1.580808  | -2.191226 |
| H | 3.148009  | 2.139760  | -0.521120 |
| H | 4.684486  | 0.247650  | -0.505566 |
| H | 3.612191  | -0.731011 | -1.487111 |
| H | 1.368980  | -0.571341 | 1.872987  |
| H | 0.895322  | 1.750296  | 0.756503  |
| C | -0.577577 | 0.343332  | 0.154612  |
| C | -0.898212 | -0.975521 | -0.221149 |
| C | -2.216265 | -1.412801 | -0.333934 |
| C | -3.245825 | -0.517648 | -0.077923 |
| C | -2.964640 | 0.796220  | 0.293107  |
| C | -1.640869 | 1.228123  | 0.407949  |
| C | -1.386601 | 2.661816  | 0.801605  |
| H | -0.849404 | 2.726700  | 1.755045  |
| H | -0.781048 | 3.185463  | 0.053299  |



|   |           |           |           |
|---|-----------|-----------|-----------|
| H | -2.330304 | 3.201739  | 0.910172  |
| H | -3.780227 | 1.488426  | 0.490931  |
| O | -4.527744 | -0.983231 | -0.203126 |
| H | -5.146442 | -0.270072 | 0.003077  |
| H | -2.427274 | -2.438341 | -0.620232 |
| O | 0.061276  | -1.904332 | -0.518776 |
| H | 0.931257  | -1.571228 | -0.220988 |

**Table S67.** Coordinates for global minimum of **3ad<sup>‡</sup>**

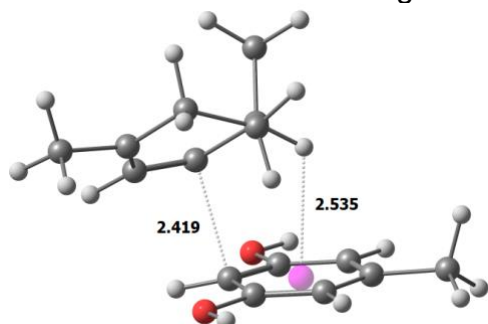

|   |           |           |           |
|---|-----------|-----------|-----------|
| C | -0.889779 | -1.016673 | 0.459623  |
| C | -1.992377 | -0.346526 | 1.005361  |
| C | -2.915647 | 0.282495  | 0.206128  |
| C | -4.151071 | 0.867779  | 0.776461  |
| H | -4.262479 | 0.660146  | 1.842162  |
| H | -4.128946 | 1.956161  | 0.622080  |
| H | -5.031692 | 0.507427  | 0.229703  |
| C | -2.752552 | 0.322557  | -1.273318 |
| C | -1.311780 | 0.111306  | -1.727206 |
| H | -0.742422 | 1.023622  | -1.521363 |
| H | -1.276713 | -0.051111 | -2.809328 |
| C | -0.644715 | -1.063597 | -1.006101 |
| H | 0.439867  | -1.031533 | -1.181819 |
| C | -1.140567 | -2.441884 | -1.507507 |
| H | -0.935860 | -2.523570 | -2.579174 |
| H | -3.422649 | -0.454817 | -1.678026 |
| H | -3.153862 | 1.267930  | -1.659087 |
| H | -2.165121 | -0.401988 | 2.077259  |
| H | -0.423495 | -1.794456 | 1.060204  |
| C | 1.952455  | -0.703441 | 1.189487  |
| C | 0.923780  | 0.216683  | 1.480041  |
| C | 0.825639  | 1.380107  | 0.693196  |
| C | 1.656415  | 1.570114  | -0.406544 |
| C | 2.629576  | 0.616020  | -0.712309 |
| C | 2.779089  | -0.524125 | 0.091992  |
| H | 3.549347  | -1.256675 | -0.137112 |
| C | 3.504818  | 0.793066  | -1.917080 |
| H | 4.519620  | 0.434216  | -1.722742 |
| H | 3.546415  | 1.839066  | -2.229995 |

|   |           |           |           |
|---|-----------|-----------|-----------|
| H | 1.552710  | 2.462595  | -1.018755 |
| O | -0.132527 | 2.260216  | 1.056340  |
| H | -0.145353 | 3.010041  | 0.443002  |
| H | 0.385568  | 0.147130  | 2.419183  |
| O | 2.039181  | -1.769713 | 2.019833  |
| H | 2.742822  | -2.364752 | 1.722219  |
| H | 3.107744  | 0.207556  | -2.755959 |
| H | -0.624002 | -3.255947 | -0.990628 |
| H | -2.216768 | -2.560339 | -1.346917 |

**Table S68.** Coordinates for global minimum of **3ad**.

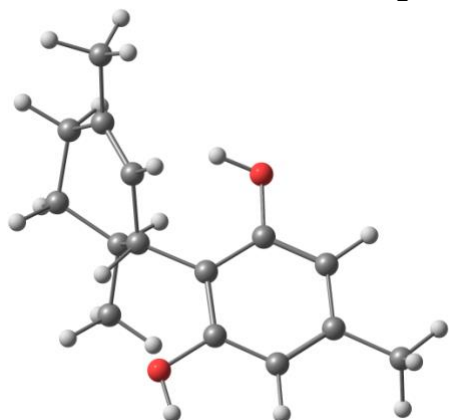

|   |           |           |           |
|---|-----------|-----------|-----------|
| C | 0.830204  | 0.575788  | 0.425779  |
| C | 1.677462  | -0.552593 | 0.978700  |
| C | 2.907165  | -0.870455 | 0.549362  |
| C | 3.677416  | -2.026581 | 1.114426  |
| H | 3.092883  | -2.586963 | 1.849479  |
| H | 3.982208  | -2.711896 | 0.312514  |
| H | 4.600968  | -1.675979 | 1.592847  |
| C | 3.591323  | -0.076541 | -0.532262 |
| C | 2.923558  | 1.275137  | -0.771264 |
| C | 1.406189  | 1.133705  | -0.897992 |
| C | 0.749760  | 2.457926  | -1.279295 |
| H | -0.338461 | 2.359317  | -1.352229 |
| H | 0.970075  | 3.225571  | -0.527136 |
| H | 1.125932  | 2.811701  | -2.245545 |
| H | 1.200530  | 0.399822  | -1.693364 |
| H | 3.146144  | 1.949504  | 0.068929  |
| H | 3.331411  | 1.744502  | -1.675197 |
| H | 3.597466  | -0.670959 | -1.459809 |
| H | 4.647700  | 0.056244  | -0.260613 |
| H | 1.230809  | -1.136416 | 1.785645  |
| H | 0.848211  | 1.393494  | 1.160018  |
| C | -0.617670 | 0.150299  | 0.267433  |
| C | -1.675143 | 0.937625  | 0.747825  |
| C | -3.009562 | 0.588552  | 0.548162  |

|   |           |           |           |
|---|-----------|-----------|-----------|
| C | -3.333565 | -0.579904 | -0.144580 |
| C | -2.305671 | -1.388696 | -0.618668 |
| C | -0.972580 | -1.027045 | -0.410107 |
| O | -0.029941 | -1.876208 | -0.922825 |
| H | 0.841974  | -1.653104 | -0.542054 |
| H | -2.520440 | -2.309673 | -1.153503 |
| C | -4.774972 | -0.965128 | -0.345282 |
| H | -5.227341 | -1.283036 | 0.601676  |
| H | -5.360864 | -0.116764 | -0.714291 |
| H | -4.868270 | -1.788869 | -1.057602 |
| H | -3.796746 | 1.233931  | 0.933999  |
| O | -1.345580 | 2.085000  | 1.422144  |
| H | -2.158539 | 2.533579  | 1.689881  |

**Table S69.** Coordinates for global minimum of **6ad<sup>‡</sup>**.

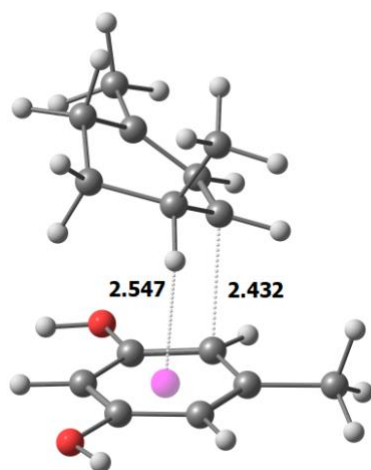

|   |           |           |           |
|---|-----------|-----------|-----------|
| C | -0.910463 | -1.076363 | 0.484849  |
| C | -1.992070 | -0.352457 | 1.002763  |
| C | -2.891178 | 0.278859  | 0.178967  |
| C | -4.109092 | 0.924595  | 0.722239  |
| H | -5.000074 | 0.567041  | 0.190391  |
| H | -4.227044 | 0.764752  | 1.795525  |
| H | -4.055854 | 2.004433  | 0.522614  |
| C | -2.721996 | 0.258449  | -1.300839 |
| C | -1.284127 | -0.002854 | -1.738351 |
| H | -0.694807 | 0.902080  | -1.558380 |
| H | -1.246830 | -0.201572 | -2.814327 |
| C | -0.647900 | -1.168932 | -0.974813 |
| H | 0.440781  | -1.157053 | -1.133441 |
| C | -1.153618 | -2.551778 | -1.451456 |
| H | -0.929605 | -2.664790 | -2.516371 |
| H | -3.408464 | -0.517488 | -1.679858 |
| H | -3.097457 | 1.197973  | -1.724961 |
| H | -2.170553 | -0.366758 | 2.075016  |
| H | -0.483991 | -1.857004 | 1.109118  |

|   |           |           |           |
|---|-----------|-----------|-----------|
| C | 2.539222  | 0.681016  | -0.739970 |
| C | 1.554252  | 1.592867  | -0.364023 |
| C | 0.787088  | 1.309113  | 0.756836  |
| C | 0.966101  | 0.108579  | 1.478252  |
| C | 2.012082  | -0.770742 | 1.118845  |
| C | 2.773803  | -0.494331 | -0.001741 |
| H | 3.568909  | -1.169968 | -0.308642 |
| C | 2.244520  | -2.017833 | 1.918586  |
| H | 1.584106  | -2.824526 | 1.572448  |
| H | 2.032230  | -1.853949 | 2.978779  |
| H | 0.459355  | -0.006510 | 2.431195  |
| O | -0.178310 | 2.138335  | 1.206331  |
| H | -0.238736 | 2.920828  | 0.638358  |
| H | 1.410314  | 2.505514  | -0.935489 |
| O | 3.264720  | 0.986544  | -1.836770 |
| H | 3.923486  | 0.296563  | -2.003492 |
| H | 3.273147  | -2.369841 | 1.809820  |
| H | -2.234496 | -2.650294 | -1.309223 |
| H | -0.659834 | -3.359900 | -0.903628 |

**Table S70.** Coordinates for global minimum of **6ad**.

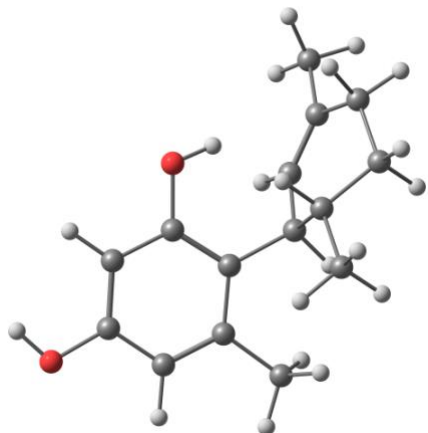

|   |           |           |           |
|---|-----------|-----------|-----------|
| C | 0.840397  | 0.597651  | 0.412458  |
| C | 1.677239  | -0.521307 | 1.001285  |
| C | 2.903684  | -0.866973 | 0.583866  |
| C | 3.659911  | -2.013215 | 1.186847  |
| H | 4.586572  | -1.657685 | 1.655587  |
| H | 3.067585  | -2.542542 | 1.938478  |
| H | 3.958060  | -2.727453 | 0.408053  |
| C | 3.596639  | -0.116702 | -0.522872 |
| C | 2.944764  | 1.234599  | -0.804637 |
| C | 1.425523  | 1.108763  | -0.927283 |
| C | 0.788772  | 2.429887  | -1.350642 |
| H | 1.028127  | 3.220638  | -0.628520 |
| H | 1.164933  | 2.743054  | -2.330746 |
| H | -0.301466 | 2.345699  | -1.415806 |

|   |           |           |           |
|---|-----------|-----------|-----------|
| H | 1.210313  | 0.356616  | -1.702035 |
| H | 3.176099  | 1.932471  | 0.013843  |
| H | 3.358347  | 1.670283  | -1.722816 |
| H | 3.594499  | -0.740883 | -1.430759 |
| H | 4.654860  | 0.011948  | -0.256515 |
| H | 1.222831  | -1.075504 | 1.824742  |
| H | 0.882097  | 1.436667  | 1.121130  |
| C | -0.616344 | 0.185232  | 0.273972  |
| C | -0.950900 | -0.996598 | -0.412637 |
| C | -2.274677 | -1.376988 | -0.631690 |
| C | -3.295507 | -0.570281 | -0.146309 |
| C | -2.999539 | 0.590088  | 0.565705  |
| C | -1.672899 | 0.967210  | 0.780548  |
| C | -1.411555 | 2.224127  | 1.573142  |
| H | -2.354519 | 2.673811  | 1.893495  |
| H | -0.815208 | 2.015504  | 2.468973  |
| H | -0.863627 | 2.969939  | 0.987647  |
| H | -3.813587 | 1.196009  | 0.952849  |
| O | -4.617199 | -0.878876 | -0.326982 |
| H | -4.688491 | -1.700599 | -0.830683 |
| H | -2.485393 | -2.298565 | -1.168567 |
| O | -0.001810 | -1.841320 | -0.922020 |
| H | 0.862089  | -1.627712 | -0.518054 |

**Table S71.** Coordinates for global minimum of **3ae<sup>‡</sup>**.

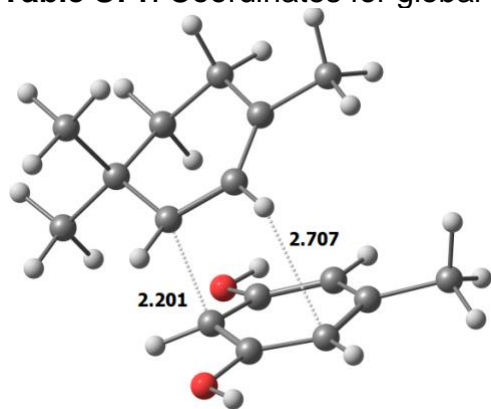

|   |           |           |           |
|---|-----------|-----------|-----------|
| C | -0.986473 | -0.525385 | 0.748822  |
| C | -0.288266 | 0.611531  | 1.246296  |
| C | -0.583117 | 1.880410  | 0.853258  |
| C | 0.135026  | 3.051403  | 1.425551  |
| H | 0.852650  | 2.760509  | 2.195892  |
| H | 0.667705  | 3.580237  | 0.623404  |
| H | -0.578447 | 3.772475  | 1.844283  |
| C | -1.692738 | 2.166059  | -0.102976 |
| C | -2.189765 | 0.944934  | -0.873825 |
| H | -1.514078 | 0.749461  | -1.711750 |
| H | -3.176442 | 1.151030  | -1.304599 |

|   |           |           |           |
|---|-----------|-----------|-----------|
| C | -2.276813 | -0.317683 | -0.005404 |
| H | -2.504614 | 2.610831  | 0.496135  |
| H | -1.384786 | 2.963595  | -0.791429 |
| H | 0.492310  | 0.458484  | 1.985343  |
| H | -0.967823 | -1.418953 | 1.372552  |
| C | 1.437634  | -1.728189 | 0.541378  |
| C | 0.471537  | -1.600931 | -0.500207 |
| C | 0.778304  | -0.702422 | -1.558477 |
| C | 1.780112  | 0.239026  | -1.413984 |
| C | 2.616418  | 0.194984  | -0.288538 |
| C | 2.476229  | -0.823139 | 0.662978  |
| H | 3.165202  | -0.889673 | 1.501371  |
| C | 3.673756  | 1.238253  | -0.109053 |
| H | 3.255508  | 2.084082  | 0.453059  |
| H | 4.021562  | 1.624226  | -1.070631 |
| H | 1.955219  | 0.977518  | -2.192421 |
| O | 0.032721  | -0.818751 | -2.675001 |
| H | 0.293274  | -0.143308 | -3.319614 |
| H | -0.181116 | -2.445157 | -0.698525 |
| O | 1.210276  | -2.723028 | 1.417068  |
| H | 1.863382  | -2.699508 | 2.133127  |
| H | 4.522694  | 0.852749  | 0.461171  |
| C | -2.703573 | -1.527756 | -0.841346 |
| H | -2.675535 | -2.445596 | -0.243162 |
| H | -3.731278 | -1.380437 | -1.189074 |
| H | -2.067023 | -1.656165 | -1.719217 |
| C | -3.333135 | -0.132104 | 1.121570  |
| H | -3.411592 | -1.037843 | 1.731505  |
| H | -3.092595 | 0.707150  | 1.779542  |
| H | -4.305554 | 0.053384  | 0.652620  |

**Table S72.** Coordinates for global minimum of **3ae**.

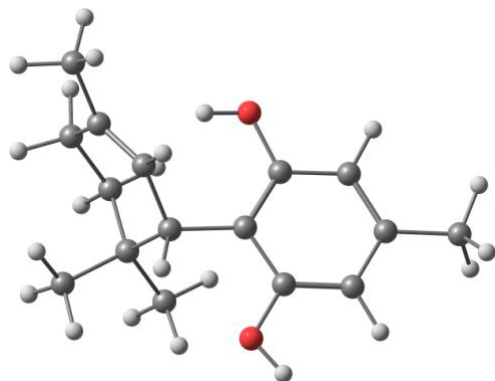

|   |          |           |          |
|---|----------|-----------|----------|
| C | 0.747779 | 0.550845  | 0.600025 |
| C | 1.611779 | -0.563020 | 1.148589 |
| C | 2.709641 | -1.061254 | 0.560476 |
| C | 3.548095 | -2.124634 | 1.206600 |

|   |           |           |           |
|---|-----------|-----------|-----------|
| H | 4.582479  | -1.774856 | 1.321616  |
| H | 3.589930  | -3.021852 | 0.575890  |
| H | 3.163840  | -2.403969 | 2.191521  |
| C | 3.171143  | -0.576481 | -0.786230 |
| C | 2.120381  | 0.259999  | -1.514310 |
| C | 1.438366  | 1.288574  | -0.597702 |
| C | 0.437316  | 2.097781  | -1.426387 |
| H | 0.969429  | 2.647127  | -2.212223 |
| H | -0.301827 | 1.446731  | -1.905589 |
| H | -0.098141 | 2.823087  | -0.805664 |
| C | 2.488082  | 2.249015  | -0.017330 |
| H | 3.172223  | 1.736315  | 0.666920  |
| H | 3.081535  | 2.699719  | -0.821773 |
| H | 1.998025  | 3.056375  | 0.539078  |
| H | 1.352251  | -0.398038 | -1.941509 |
| H | 2.585695  | 0.786022  | -2.358060 |
| H | 3.460210  | -1.442045 | -1.398973 |
| H | 4.097618  | 0.001666  | -0.646410 |
| H | 1.309170  | -0.960388 | 2.118911  |
| H | 0.676387  | 1.291605  | 1.407267  |
| C | -0.685841 | 0.099142  | 0.351373  |
| C | -1.040454 | -1.127785 | -0.234513 |
| C | -2.372811 | -1.470401 | -0.487702 |
| C | -3.402903 | -0.601334 | -0.149515 |
| C | -3.084126 | 0.611108  | 0.465836  |
| C | -1.754076 | 0.941896  | 0.709895  |
| O | -1.435843 | 2.127967  | 1.320148  |
| H | -2.251988 | 2.606033  | 1.518373  |
| H | -3.872113 | 1.302201  | 0.759866  |
| C | -4.838411 | -0.952314 | -0.434099 |
| H | -5.250463 | -0.300898 | -1.213838 |
| H | -4.933262 | -1.987263 | -0.772316 |
| H | -5.459506 | -0.819700 | 0.458217  |
| H | -2.582209 | -2.432944 | -0.946100 |
| O | -0.112498 | -2.062287 | -0.600920 |
| H | 0.743802  | -1.827225 | -0.188826 |

**Table S73.** Coordinates for global minimum of **6ae<sup>‡</sup>**.

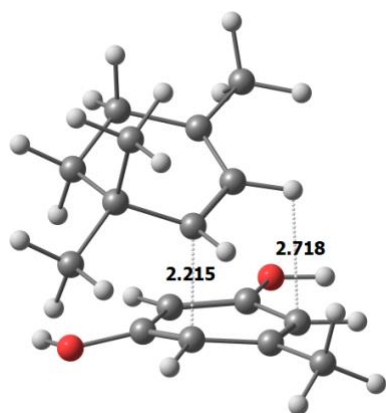

|   |           |           |           |
|---|-----------|-----------|-----------|
| C | -0.978220 | -0.565591 | 0.847205  |
| C | -0.400422 | 0.675124  | 1.234234  |
| C | -0.771137 | 1.858472  | 0.673067  |
| C | -0.162788 | 3.144605  | 1.108992  |
| H | 0.382931  | 3.591091  | 0.266349  |
| H | -0.942279 | 3.866095  | 1.384224  |
| H | 0.526109  | 3.014200  | 1.946721  |
| C | -1.860749 | 1.935235  | -0.344148 |
| C | -2.245807 | 0.593475  | -0.967109 |
| H | -1.538626 | 0.353680  | -1.765707 |
| H | -3.234592 | 0.669848  | -1.433893 |
| C | -2.257300 | -0.558370 | 0.047309  |
| H | -2.722895 | 2.391275  | 0.170259  |
| H | -1.584218 | 2.660297  | -1.120531 |
| H | 0.355577  | 0.676702  | 2.013457  |
| H | -0.908879 | -1.383750 | 1.562641  |
| C | 2.439706  | 0.525500  | -0.399822 |
| C | 1.608908  | 0.267332  | -1.494463 |
| C | 0.789803  | -0.842825 | -1.443015 |
| C | 0.652685  | -1.594965 | -0.241390 |
| C | 1.641024  | -1.418320 | 0.779199  |
| C | 2.503826  | -0.350475 | 0.703308  |
| H | 3.227161  | -0.162802 | 1.493734  |
| C | 1.650014  | -2.332590 | 1.962842  |
| H | 2.631736  | -2.340636 | 2.442155  |
| H | 1.373833  | -3.352339 | 1.681026  |
| H | 0.132209  | -2.546491 | -0.300596 |
| O | 0.081269  | -1.271051 | -2.505532 |
| H | 0.225106  | -0.686783 | -3.265495 |
| H | 1.665448  | 0.895659  | -2.379066 |
| O | 3.216370  | 1.617252  | -0.482008 |
| H | 3.781480  | 1.694823  | 0.301681  |
| H | 0.923722  | -1.991500 | 2.713942  |
| C | -2.558186 | -1.897489 | -0.632219 |
| H | -3.577471 | -1.879600 | -1.031934 |



|   |           |           |           |
|---|-----------|-----------|-----------|
| H | -1.874011 | -2.096385 | -1.458368 |
| H | -2.491632 | -2.720172 | 0.088926  |
| C | -3.360407 | -0.324580 | 1.118963  |
| H | -3.376707 | -1.146997 | 1.841390  |
| H | -3.215051 | 0.611310  | 1.665021  |
| H | -4.330846 | -0.291894 | 0.611759  |

**Table S74.** Coordinates for global minimum of **6ae**.

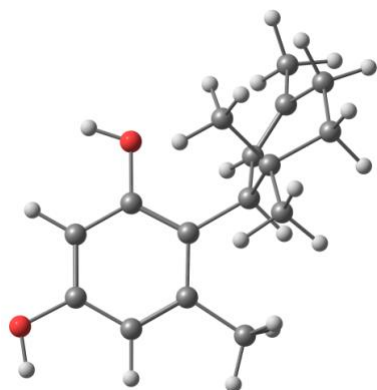

|   |           |           |           |
|---|-----------|-----------|-----------|
| C | 0.751527  | 0.435844  | 0.457885  |
| C | 1.551390  | -0.741642 | 0.974130  |
| C | 2.847336  | -0.953664 | 0.729984  |
| C | 3.581057  | -2.148553 | 1.267639  |
| H | 4.018877  | -2.734023 | 0.447392  |
| H | 4.416372  | -1.841364 | 1.911035  |
| H | 2.921550  | -2.804098 | 1.844272  |
| C | 3.650557  | -0.011713 | -0.126130 |
| C | 2.927352  | 1.309748  | -0.376225 |
| H | 3.437899  | 1.876955  | -1.166305 |
| C | 1.447979  | 1.125194  | -0.762060 |
| C | 1.347590  | 0.314901  | -2.058309 |
| H | 1.735901  | -0.698788 | -1.942646 |
| H | 1.920054  | 0.821987  | -2.845160 |
| H | 0.307394  | 0.238645  | -2.392075 |
| C | 0.835115  | 2.506920  | -1.010891 |
| H | 1.304121  | 2.974889  | -1.884663 |
| H | -0.241597 | 2.434079  | -1.203683 |
| H | 0.990905  | 3.169238  | -0.151535 |
| H | 2.971763  | 1.922528  | 0.535785  |
| H | 3.895179  | -0.509946 | -1.077734 |
| H | 4.619943  | 0.179316  | 0.356765  |
| H | 1.010349  | -1.449187 | 1.602844  |
| H | 0.788765  | 1.195042  | 1.252105  |
| C | -0.727327 | 0.113819  | 0.279655  |
| C | -1.167565 | -1.043381 | -0.393614 |
| C | -2.519123 | -1.330174 | -0.585389 |
| C | -3.475446 | -0.463822 | -0.075789 |

|   |           |           |           |
|---|-----------|-----------|-----------|
| C | -3.082758 | 0.662739  | 0.639946  |
| C | -1.726379 | 0.946238  | 0.829050  |
| C | -1.391509 | 2.147151  | 1.680946  |
| H | -0.787252 | 1.862384  | 2.550138  |
| H | -2.308202 | 2.612969  | 2.050906  |
| H | -0.828384 | 2.905700  | 1.130860  |
| H | -3.837568 | 1.319153  | 1.066987  |
| O | -4.789489 | -0.778902 | -0.292406 |
| H | -5.349681 | -0.105014 | 0.115251  |
| H | -2.824045 | -2.226314 | -1.120661 |
| O | -0.229927 | -1.921363 | -0.860120 |
| H | -0.678586 | -2.660726 | -1.291759 |

**Table S75.** Coordinates for global minimum of **3a<sup>‡</sup>**.

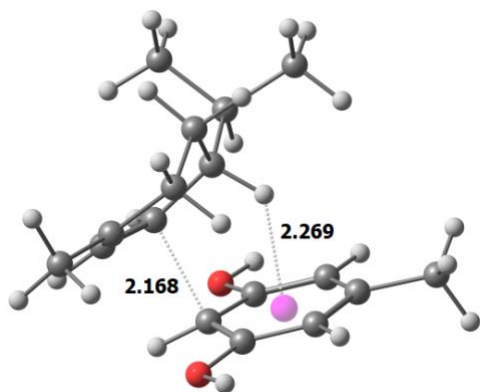

|   |           |           |           |
|---|-----------|-----------|-----------|
| C | 0.811504  | 0.441945  | 0.953730  |
| C | 2.044704  | -0.257777 | 1.043403  |
| C | 2.795045  | -0.530165 | -0.060559 |
| C | 4.046190  | -1.324389 | 0.009928  |
| H | 3.999843  | -2.150084 | -0.712688 |
| H | 4.898429  | -0.703880 | -0.298635 |
| H | 4.231987  | -1.725257 | 1.008633  |
| C | 2.368138  | -0.001535 | -1.393178 |
| C | 1.616871  | 1.321355  | -1.247106 |
| H | 1.278812  | 1.670057  | -2.227561 |
| H | 2.311038  | 2.071469  | -0.848981 |
| C | 0.413015  | 1.166501  | -0.305635 |
| H | 3.241678  | 0.108209  | -2.045869 |
| H | 1.720659  | -0.755892 | -1.871970 |
| H | 2.353681  | -0.640316 | 2.013576  |
| H | 0.419338  | 0.848396  | 1.884836  |
| C | -0.371569 | -1.984205 | 0.143110  |
| C | -0.605313 | -1.165572 | 1.281864  |
| C | -1.808353 | -0.406431 | 1.311674  |
| C | -2.612359 | -0.306426 | 0.191243  |
| C | -2.291997 | -1.039771 | -0.961756 |
| C | -1.171911 | -1.880756 | -0.983051 |

|   |           |           |           |
|---|-----------|-----------|-----------|
| H | -0.944233 | -2.465308 | -1.870873 |
| C | -3.180169 | -0.953160 | -2.163905 |
| H | -3.648475 | 0.031523  | -2.240981 |
| H | -3.985422 | -1.694420 | -2.078491 |
| H | -3.495922 | 0.326926  | 0.206308  |
| O | -2.052621 | 0.237165  | 2.469154  |
| H | -2.848496 | 0.784492  | 2.388075  |
| H | -0.138179 | -1.434920 | 2.223935  |
| O | 0.696729  | -2.794139 | 0.226267  |
| H | 0.824083  | -3.274530 | -0.606603 |
| H | -2.629366 | -1.167658 | -3.082911 |
| H | -0.314907 | 0.537622  | -0.843930 |
| C | -0.320795 | 2.488340  | 0.026124  |
| H | -1.108061 | 2.224736  | 0.747885  |
| C | -1.004436 | 3.067644  | -1.212458 |
| C | 0.588981  | 3.526327  | 0.688773  |
| H | 1.133529  | 3.108238  | 1.543756  |
| H | 1.324674  | 3.923469  | -0.018939 |
| H | -0.006357 | 4.370286  | 1.052430  |
| H | -1.611672 | 3.937748  | -0.941536 |
| H | -1.660976 | 2.327120  | -1.684966 |
| H | -0.269205 | 3.396337  | -1.955205 |

**Table S76.** Coordinates for global minimum of **3a**.

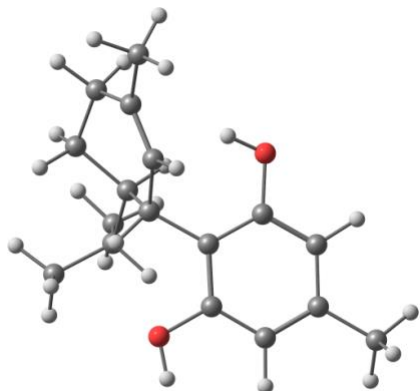

|   |           |           |           |
|---|-----------|-----------|-----------|
| C | -0.706071 | -0.017253 | -0.675694 |
| C | -1.399827 | -1.342732 | -0.920568 |
| C | -2.600595 | -1.685632 | -0.432520 |
| C | -3.206681 | -3.035759 | -0.675248 |
| H | -4.144486 | -2.940727 | -1.237579 |
| H | -3.461512 | -3.517848 | 0.277803  |
| H | -2.530781 | -3.693222 | -1.229214 |
| C | -3.416864 | -0.721055 | 0.386382  |
| C | -2.924984 | 0.716726  | 0.239186  |
| H | -3.177720 | 1.078896  | -0.766719 |
| C | -1.409430 | 0.798988  | 0.439070  |
| H | -1.176128 | 0.306340  | 1.397066  |

|   |           |           |           |
|---|-----------|-----------|-----------|
| C | -0.872966 | 2.243405  | 0.539837  |
| C | -1.371672 | 3.154183  | -0.585997 |
| H | -0.841669 | 4.112822  | -0.559288 |
| H | -2.442023 | 3.364985  | -0.477248 |
| H | -1.210320 | 2.713418  | -1.575056 |
| C | -1.195415 | 2.860756  | 1.904159  |
| H | -2.277578 | 2.956584  | 2.052980  |
| H | -0.793499 | 2.249092  | 2.719911  |
| H | -0.762398 | 3.864030  | 1.986470  |
| H | 0.221866  | 2.177397  | 0.462757  |
| H | -3.445107 | 1.364860  | 0.954293  |
| H | -3.388459 | -1.032607 | 1.442762  |
| H | -4.469839 | -0.801295 | 0.082355  |
| H | -0.855053 | -2.059553 | -1.537802 |
| H | -0.764318 | 0.559590  | -1.608253 |
| C | 0.767014  | -0.224266 | -0.372119 |
| C | 1.764356  | 0.514306  | -1.026353 |
| C | 3.115323  | 0.383209  | -0.708500 |
| C | 3.517874  | -0.511108 | 0.285215  |
| C | 2.552405  | -1.269392 | 0.940275  |
| C | 1.202629  | -1.128201 | 0.610259  |
| O | 0.325017  | -1.907598 | 1.313330  |
| H | -0.541963 | -1.896929 | 0.862122  |
| H | 2.830170  | -1.981970 | 1.712008  |
| C | 4.978331  | -0.673952 | 0.612057  |
| H | 5.485747  | 0.295679  | 0.644873  |
| H | 5.115174  | -1.173121 | 1.575138  |
| H | 5.481261  | -1.278139 | -0.153197 |
| H | 3.852368  | 0.984505  | -1.237974 |
| O | 1.354951  | 1.394264  | -1.994956 |
| H | 2.130202  | 1.841259  | -2.359354 |

**Table S77.** Coordinates for global minimum of **6a<sup>‡</sup>**.

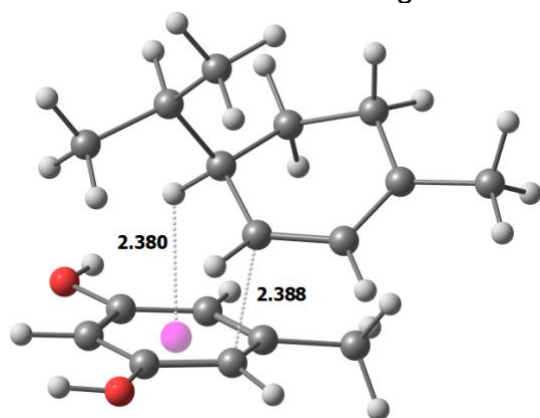

|   |           |           |          |
|---|-----------|-----------|----------|
| C | -0.839187 | -0.336387 | 0.742380 |
| C | -1.876722 | 0.544812  | 1.098319 |

|   |           |           |           |
|---|-----------|-----------|-----------|
| C | -2.803686 | 0.981640  | 0.188536  |
| C | -3.980569 | 1.779130  | 0.614077  |
| H | -4.905568 | 1.314756  | 0.249022  |
| H | -4.033171 | 1.902452  | 1.697494  |
| H | -3.934367 | 2.769669  | 0.140405  |
| C | -2.708267 | 0.615499  | -1.250694 |
| C | -1.331055 | 0.102872  | -1.667617 |
| H | -0.677614 | 0.971640  | -1.806894 |
| H | -1.394356 | -0.402348 | -2.636919 |
| C | -0.651775 | -0.822951 | -0.645378 |
| H | -3.505825 | -0.117587 | -1.445856 |
| H | -2.987883 | 1.488926  | -1.855284 |
| H | -1.999142 | 0.805268  | 2.147284  |
| H | -0.427747 | -0.944450 | 1.543679  |
| C | 2.790364  | 0.309393  | -0.826645 |
| C | 2.798164  | -0.501280 | 0.313599  |
| C | 1.972654  | -0.158817 | 1.369503  |
| C | 1.099087  | 0.950051  | 1.282258  |
| C | 1.161409  | 1.798644  | 0.151456  |
| C | 1.982009  | 1.456399  | -0.908862 |
| H | 2.023480  | 2.078988  | -1.799483 |
| C | 0.315176  | 3.030079  | 0.116502  |
| H | 0.476105  | 3.602262  | -0.799554 |
| H | 0.528720  | 3.668987  | 0.980305  |
| H | 0.589231  | 1.278269  | 2.182744  |
| O | 1.907632  | -0.875448 | 2.514137  |
| H | 2.498145  | -1.641892 | 2.467106  |
| H | 3.446305  | -1.372087 | 0.356906  |
| O | 3.606541  | -0.062496 | -1.832410 |
| H | 3.533076  | 0.557342  | -2.573145 |
| H | -0.748474 | 2.761454  | 0.181154  |
| H | 0.427229  | -0.804701 | -0.864024 |
| C | -1.024910 | -2.342519 | -0.744746 |
| H | -0.995221 | -2.558388 | -1.821947 |
| C | -2.421900 | -2.683623 | -0.222501 |
| C | 0.032458  | -3.214194 | -0.063500 |
| H | 1.032830  | -3.010577 | -0.460696 |
| H | 0.055415  | -3.052830 | 1.020997  |
| H | -0.191170 | -4.273185 | -0.229523 |
| H | -2.625532 | -3.747814 | -0.381233 |
| H | -3.207520 | -2.118969 | -0.731290 |
| H | -2.503575 | -2.489203 | 0.853593  |

**Table S78.** Coordinates for global minimum of **6a**.

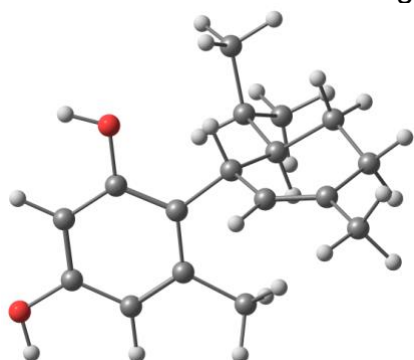

|   |           |           |           |
|---|-----------|-----------|-----------|
| C | -0.712462 | -0.072605 | -0.589969 |
| C | -1.402705 | -1.395897 | -0.846502 |
| C | -2.652923 | -1.691045 | -0.476807 |
| C | -3.269285 | -3.036707 | -0.725828 |
| H | -2.568881 | -3.720417 | -1.214699 |
| H | -4.166359 | -2.947695 | -1.352662 |
| H | -3.593971 | -3.491561 | 0.220261  |
| C | -3.513307 | -0.686083 | 0.243885  |
| C | -2.967211 | 0.736079  | 0.128219  |
| C | -1.471339 | 0.779281  | 0.453686  |
| H | -1.337915 | 0.302160  | 1.434841  |
| C | -0.901095 | 2.210150  | 0.573075  |
| C | -1.308175 | 2.860443  | 1.898960  |
| H | -1.003003 | 2.243412  | 2.751977  |
| H | -2.394117 | 3.003194  | 1.955080  |
| H | -0.841222 | 3.845927  | 2.008224  |
| C | -1.279340 | 3.118895  | -0.600594 |
| H | -2.349732 | 3.355800  | -0.586463 |
| H | -1.043844 | 2.662180  | -1.567465 |
| H | -0.730673 | 4.065501  | -0.538140 |
| H | 0.194816  | 2.109034  | 0.580937  |
| H | -3.526808 | 1.406289  | 0.792071  |
| H | -3.124349 | 1.096006  | -0.897912 |
| H | -4.536829 | -0.734912 | -0.154640 |
| H | -3.593819 | -0.980372 | 1.303400  |
| H | -0.810457 | -2.149385 | -1.368265 |
| H | -0.750197 | 0.483768  | -1.535435 |
| C | 0.765484  | -0.254447 | -0.268368 |
| C | 1.727306  | 0.341970  | -1.106584 |
| C | 3.096796  | 0.226596  | -0.881685 |
| C | 3.537232  | -0.510626 | 0.210684  |
| C | 2.618885  | -1.119860 | 1.058606  |
| C | 1.243496  | -0.994066 | 0.829855  |
| C | 0.325415  | -1.657298 | 1.827055  |
| H | -0.623801 | -1.956974 | 1.378971  |
| H | 0.101620  | -0.975302 | 2.656816  |

|   |          |           |           |
|---|----------|-----------|-----------|
| H | 0.807653 | -2.541341 | 2.254947  |
| H | 2.971185 | -1.698918 | 1.910092  |
| O | 4.889787 | -0.605900 | 0.398142  |
| H | 5.064044 | -1.144368 | 1.181519  |
| H | 3.814414 | 0.698059  | -1.548728 |
| O | 1.276999 | 1.063096  | -2.182835 |
| H | 2.035764 | 1.417818  | -2.664598 |

**Table S79.** Coordinates for global minimum of **3af<sup>‡</sup>**.

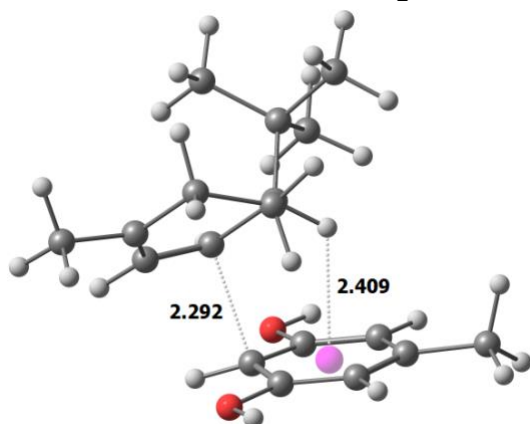

|   |           |           |           |
|---|-----------|-----------|-----------|
| C | 0.717829  | 0.094342  | -0.877699 |
| C | 1.485660  | 1.255904  | -1.117037 |
| C | 2.321788  | 1.784318  | -0.174061 |
| C | 3.247336  | 2.897923  | -0.502265 |
| H | 4.275518  | 2.630166  | -0.227120 |
| H | 3.210151  | 3.175847  | -1.557341 |
| H | 2.989556  | 3.773311  | 0.109762  |
| C | 2.391237  | 1.215943  | 1.200883  |
| C | 1.182867  | 0.356026  | 1.550565  |
| H | 0.339617  | 1.029638  | 1.739817  |
| H | 1.354497  | -0.183899 | 2.483949  |
| C | 0.744088  | -0.607601 | 0.435610  |
| H | 3.338424  | 0.660138  | 1.279008  |
| H | 2.493983  | 2.039707  | 1.919980  |
| H | 1.483893  | 1.676285  | -2.120249 |
| H | 0.480972  | -0.504111 | -1.753411 |
| C | -1.598449 | 1.607405  | -0.079349 |
| C | -1.406069 | 0.862707  | -1.264681 |
| C | -2.052161 | -0.392140 | -1.376598 |
| C | -2.727596 | -0.942302 | -0.302419 |
| C | -2.833760 | -0.217641 | 0.896279  |
| C | -2.277151 | 1.060026  | 1.002675  |
| H | -2.383860 | 1.628884  | 1.923057  |
| C | -3.530447 | -0.834441 | 2.070793  |
| H | -2.854101 | -1.537067 | 2.574113  |
| H | -4.408848 | -1.403291 | 1.752339  |

|   |           |           |           |
|---|-----------|-----------|-----------|
| H | -3.181832 | -1.926563 | -0.386395 |
| O | -1.907397 | -1.015069 | -2.566860 |
| H | -2.324762 | -1.888908 | -2.538419 |
| H | -1.056863 | 1.362515  | -2.162117 |
| O | -1.050871 | 2.837948  | -0.067455 |
| H | -1.193089 | 3.262718  | 0.792049  |
| H | -3.832428 | -0.078860 | 2.799581  |
| H | -0.282002 | -0.923223 | 0.677073  |
| C | 1.520202  | -1.982226 | 0.289149  |
| C | 0.632542  | -2.956998 | -0.501730 |
| C | 1.754188  | -2.575449 | 1.683390  |
| H | 2.130757  | -3.599156 | 1.579236  |
| H | 2.496243  | -2.006363 | 2.252103  |
| H | 0.823958  | -2.613320 | 2.262694  |
| H | -0.320708 | -3.123823 | 0.013515  |
| H | 1.140675  | -3.922598 | -0.598563 |
| H | 0.416322  | -2.600576 | -1.514547 |
| C | 2.868662  | -1.838882 | -0.430578 |
| H | 3.540864  | -1.150623 | 0.090006  |
| H | 3.362738  | -2.816195 | -0.469387 |
| H | 2.748895  | -1.487981 | -1.461438 |

**Table S80.** Coordinates for global minimum of **3af**.

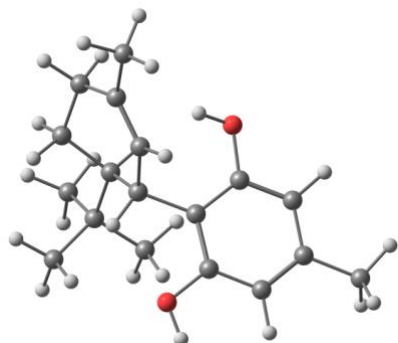

|   |           |           |           |
|---|-----------|-----------|-----------|
| C | -0.659029 | -0.149302 | -0.682888 |
| C | -1.186302 | -1.559302 | -0.899735 |
| C | -2.333223 | -2.054563 | -0.418527 |
| C | -2.734481 | -3.487273 | -0.605895 |
| H | -1.961948 | -4.063002 | -1.123423 |
| H | -2.931061 | -3.959838 | 0.365601  |
| H | -3.667720 | -3.554346 | -1.179862 |
| C | -3.289496 | -1.167953 | 0.326848  |
| C | -2.998224 | 0.308411  | 0.076981  |
| H | -3.249299 | 0.544302  | -0.966518 |
| H | -3.655943 | 0.908936  | 0.709822  |
| C | -1.522661 | 0.653947  | 0.339037  |
| H | -1.278252 | 0.288647  | 1.349070  |
| C | -1.267217 | 2.197143  | 0.380814  |



|   |           |           |           |
|---|-----------|-----------|-----------|
| C | 0.174084  | 2.515087  | 0.813233  |
| H | 0.902903  | 2.253928  | 0.045242  |
| H | 0.440280  | 1.977004  | 1.731376  |
| H | 0.269559  | 3.589649  | 1.009591  |
| C | -2.192385 | 2.834639  | 1.437360  |
| H | -3.242253 | 2.838181  | 1.131370  |
| H | -1.898589 | 3.877653  | 1.599230  |
| H | -2.114467 | 2.309578  | 2.397677  |
| C | -1.538896 | 2.869322  | -0.972488 |
| H | -2.569631 | 2.705858  | -1.305209 |
| H | -1.386683 | 3.951618  | -0.883039 |
| H | -0.860546 | 2.504375  | -1.750669 |
| H | -3.241525 | -1.394561 | 1.404306  |
| H | -4.315938 | -1.410429 | 0.018031  |
| H | -0.522256 | -2.215286 | -1.464979 |
| H | -0.715680 | 0.370147  | -1.646989 |
| C | 0.815504  | -0.273455 | -0.329378 |
| C | 1.819681  | 0.296969  | -1.125022 |
| C | 3.169049  | 0.214044  | -0.790076 |
| C | 3.565608  | -0.468908 | 0.362117  |
| C | 2.595571  | -1.091268 | 1.141342  |
| C | 1.247863  | -1.007430 | 0.785076  |
| O | 0.364561  | -1.671961 | 1.594042  |
| H | -0.466087 | -1.808486 | 1.100985  |
| H | 2.869581  | -1.662350 | 2.024027  |
| C | 5.020399  | -0.530063 | 0.743147  |
| H | 5.640517  | -0.817213 | -0.112675 |
| H | 5.373600  | 0.450605  | 1.083817  |
| H | 5.188485  | -1.247842 | 1.550254  |
| H | 3.911481  | 0.689343  | -1.428885 |
| O | 1.417320  | 0.978980  | -2.245485 |
| H | 2.196113  | 1.343937  | -2.686041 |

**Table S81.** Coordinates for global minimum of **6af<sup>‡</sup>**.

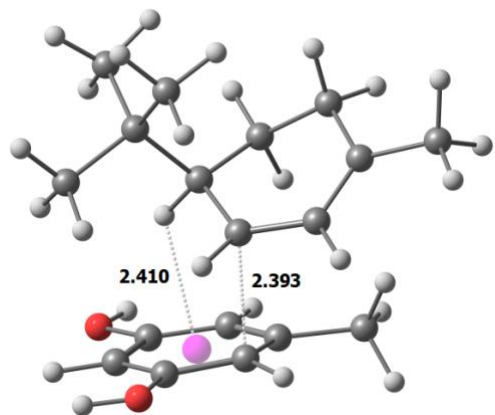

|   |           |           |           |
|---|-----------|-----------|-----------|
| C | -0.767135 | -0.069538 | -0.884920 |
|---|-----------|-----------|-----------|

|   |           |           |           |
|---|-----------|-----------|-----------|
| C | -1.679542 | -1.123628 | -1.082703 |
| C | -2.601498 | -1.474034 | -0.131458 |
| C | -3.674088 | -2.456873 | -0.422614 |
| H | -3.547557 | -3.331339 | 0.230973  |
| H | -4.654412 | -2.033038 | -0.169953 |
| H | -3.671369 | -2.784721 | -1.463880 |
| C | -2.600332 | -0.831592 | 1.211492  |
| C | -1.286148 | -0.132338 | 1.538980  |
| H | -0.544101 | -0.903939 | 1.774664  |
| H | -1.392016 | 0.473615  | 2.440983  |
| C | -0.706844 | 0.699345  | 0.382643  |
| H | -3.459904 | -0.143929 | 1.244055  |
| H | -2.827777 | -1.593675 | 1.969083  |
| H | -1.722032 | -1.594461 | -2.062310 |
| H | -0.390440 | 0.410522  | -1.783411 |
| C | 2.843543  | 0.037794  | 0.860256  |
| C | 2.805591  | 0.621253  | -0.410747 |
| C | 2.076241  | -0.011247 | -1.401734 |
| C | 1.336057  | -1.184666 | -1.127668 |
| C | 1.446793  | -1.796282 | 0.142949  |
| C | 2.172607  | -1.165446 | 1.137925  |
| H | 2.246057  | -1.604549 | 2.129893  |
| C | 0.756946  | -3.099914 | 0.387241  |
| H | 1.110410  | -3.859021 | -0.319306 |
| H | -0.324307 | -2.997042 | 0.220758  |
| H | 0.910000  | -1.733351 | -1.962144 |
| O | 1.984369  | 0.466095  | -2.663421 |
| H | 2.489475  | 1.288079  | -2.748482 |
| H | 3.349542  | 1.541601  | -0.603420 |
| O | 3.567895  | 0.682108  | 1.796881  |
| H | 3.544049  | 0.194359  | 2.633510  |
| H | 0.922453  | -3.457665 | 1.405706  |
| H | 0.353050  | 0.879089  | 0.621668  |
| C | -1.277244 | 2.161581  | 0.150380  |
| C | -2.623020 | 2.166784  | -0.588248 |
| C | -0.251933 | 2.958250  | -0.671938 |
| H | -0.069365 | 2.515137  | -1.657101 |
| H | -0.622523 | 3.975939  | -0.836376 |
| H | 0.705842  | 3.025044  | -0.143276 |
| H | -2.537131 | 1.752709  | -1.598978 |
| H | -2.979490 | 3.198640  | -0.683302 |
| H | -3.389689 | 1.602221  | -0.049575 |
| C | -1.444355 | 2.851919  | 1.509175  |
| H | -2.267768 | 2.420568  | 2.086738  |
| H | -0.526809 | 2.786604  | 2.105649  |
| H | -1.670885 | 3.911780  | 1.348241  |

**Table S82.** Coordinates for global minimum of **6af**.

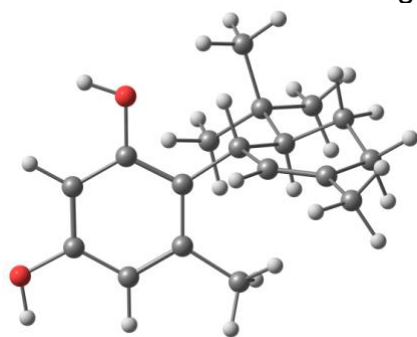

|   |           |           |           |
|---|-----------|-----------|-----------|
| C | -0.670397 | -0.201046 | -0.588999 |
| C | -1.180551 | -1.614234 | -0.810458 |
| C | -2.366291 | -2.087736 | -0.421181 |
| C | -2.772687 | -3.518642 | -0.617494 |
| H | -1.980989 | -4.104560 | -1.093840 |
| H | -3.015738 | -3.985075 | 0.347260  |
| H | -3.678879 | -3.588444 | -1.233575 |
| C | -3.358557 | -1.184411 | 0.253706  |
| C | -3.043002 | 0.290227  | 0.014631  |
| H | -3.236437 | 0.526460  | -1.041090 |
| H | -3.729621 | 0.896592  | 0.610944  |
| C | -1.581962 | 0.628928  | 0.359121  |
| H | -1.416840 | 0.292903  | 1.391091  |
| C | -1.303509 | 2.169613  | 0.369908  |
| C | -2.320715 | 2.866284  | 1.295489  |
| H | -2.375382 | 2.365078  | 2.270199  |
| H | -3.326458 | 2.892809  | 0.866280  |
| H | -2.011897 | 3.903621  | 1.466904  |
| C | -1.409126 | 2.795415  | -1.027423 |
| H | -2.384813 | 2.601902  | -1.486979 |
| H | -0.629497 | 2.420927  | -1.698574 |
| H | -1.287944 | 3.882954  | -0.953610 |
| C | 0.092130  | 2.473328  | 0.942058  |
| H | 0.892599  | 2.127879  | 0.285010  |
| H | 0.209120  | 3.555675  | 1.074539  |
| H | 0.228943  | 1.994878  | 1.919891  |
| H | -3.377605 | -1.401445 | 1.334614  |
| H | -4.368636 | -1.416515 | -0.113280 |
| H | -0.479499 | -2.282918 | -1.312492 |
| H | -0.717008 | 0.294349  | -1.566170 |
| C | 0.810306  | -0.285650 | -0.229905 |
| C | 1.764862  | 0.157329  | -1.164664 |
| C | 3.135411  | 0.095306  | -0.927511 |
| C | 3.584365  | -0.441317 | 0.272942  |
| C | 2.672881  | -0.918547 | 1.208155  |
| C | 1.296498  | -0.851816 | 0.962477  |
| C | 0.387194  | -1.389836 | 2.038809  |

|   |           |           |           |
|---|-----------|-----------|-----------|
| H | 0.087565  | -0.593465 | 2.731195  |
| H | -0.522705 | -1.830031 | 1.624777  |
| H | 0.909105  | -2.151617 | 2.625345  |
| H | 3.032525  | -1.356144 | 2.137389  |
| O | 4.938038  | -0.486305 | 0.472396  |
| H | 5.118820  | -0.887901 | 1.332696  |
| H | 3.847990  | 0.453145  | -1.666517 |
| O | 1.304170  | 0.682998  | -2.346056 |
| H | 2.056312  | 0.972195  | -2.879487 |

**Table S83.** Coordinates for global minimum of **3c<sup>‡</sup>**.

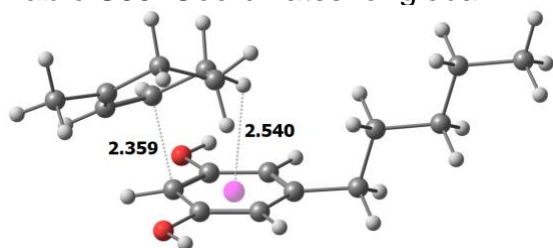

|   |           |           |           |
|---|-----------|-----------|-----------|
| C | -2.089750 | 0.035472  | -1.185686 |
| C | -3.244207 | 0.584454  | -0.599353 |
| C | -3.276995 | 1.886247  | -0.172036 |
| C | -4.533964 | 2.505231  | 0.311977  |
| H | -5.394565 | 1.840792  | 0.215202  |
| H | -4.409508 | 2.782108  | 1.368512  |
| H | -4.726045 | 3.444732  | -0.222087 |
| C | -2.071025 | 2.759870  | -0.265749 |
| C | -0.765236 | 1.973145  | -0.296763 |
| H | -0.565960 | 1.568169  | 0.701073  |
| H | 0.070145  | 2.634099  | -0.546803 |
| C | -0.840492 | 0.825531  | -1.299620 |
| H | 0.036390  | 0.168296  | -1.235145 |
| H | -2.191081 | 3.354794  | -1.187995 |
| H | -2.080784 | 3.488342  | 0.553790  |
| H | -4.153598 | -0.010476 | -0.571034 |
| H | -2.221313 | -0.791376 | -1.879081 |
| C | -0.746650 | -2.454459 | -0.543820 |
| C | -1.673042 | -1.770076 | 0.273483  |
| C | -1.180287 | -1.034042 | 1.372334  |
| C | 0.186132  | -0.879248 | 1.568850  |
| C | 1.085390  | -1.501729 | 0.698401  |
| C | 0.617059  | -2.297528 | -0.357583 |
| H | 1.321102  | -2.795310 | -1.020402 |
| H | 0.554189  | -0.280050 | 2.398597  |
| O | -2.113914 | -0.476352 | 2.171214  |
| H | -1.688471 | 0.039487  | 2.872611  |
| H | -2.725316 | -2.029498 | 0.224605  |
| O | -1.282305 | -3.210438 | -1.529443 |

|   |           |           |           |
|---|-----------|-----------|-----------|
| H | -0.577596 | -3.598311 | -2.068674 |
| H | -0.830957 | 1.209538  | -2.336120 |
| C | 2.557876  | -1.257878 | 0.851949  |
| H | 3.120180  | -2.118730 | 0.471102  |
| H | 2.805835  | -1.136761 | 1.913372  |
| C | 2.989850  | 0.007347  | 0.087059  |
| H | 2.726082  | -0.108717 | -0.973613 |
| H | 2.414971  | 0.865835  | 0.462587  |
| C | 4.484418  | 0.288436  | 0.220615  |
| H | 5.052525  | -0.575921 | -0.152787 |
| H | 4.741664  | 0.393564  | 1.284645  |
| C | 4.919269  | 1.545301  | -0.532644 |
| H | 4.656943  | 1.438545  | -1.594279 |
| H | 4.348285  | 2.406052  | -0.157522 |
| C | 6.415655  | 1.821718  | -0.397501 |
| H | 7.004686  | 0.986239  | -0.792944 |
| H | 6.706729  | 2.725805  | -0.942403 |
| H | 6.694741  | 1.958012  | 0.653757  |

**Table S84.** Coordinates for global minimum of **3c**.

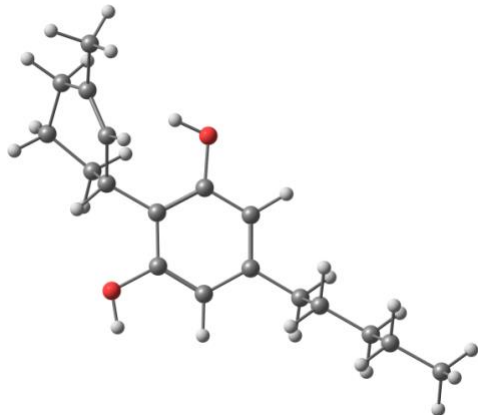

|   |          |           |           |
|---|----------|-----------|-----------|
| C | 2.509176 | 0.594388  | 0.442564  |
| C | 3.041741 | -0.738209 | 0.926063  |
| C | 4.220970 | -1.264775 | 0.563217  |
| C | 4.681207 | -2.603562 | 1.058300  |
| H | 3.923734 | -3.091614 | 1.678097  |
| H | 4.920736 | -3.262258 | 0.213109  |
| H | 5.602977 | -2.500195 | 1.645180  |
| C | 5.161434 | -0.539935 | -0.365769 |
| C | 4.822522 | 0.944131  | -0.505025 |
| C | 3.327266 | 1.126474  | -0.750279 |
| H | 3.039085 | 0.581258  | -1.660430 |
| H | 3.077218 | 2.181012  | -0.914392 |
| H | 5.105832 | 1.470083  | 0.417257  |
| H | 5.402987 | 1.388655  | -1.321796 |
| H | 5.136646 | -1.032262 | -1.350920 |

|   |           |           |           |
|---|-----------|-----------|-----------|
| H | 6.188454  | -0.668875 | 0.002801  |
| H | 2.411767  | -1.283593 | 1.631545  |
| H | 2.618804  | 1.307443  | 1.270540  |
| C | 1.033032  | 0.538694  | 0.100387  |
| C | 0.482987  | -0.491783 | -0.680270 |
| C | -0.863759 | -0.501114 | -1.046287 |
| C | -1.705777 | 0.534170  | -0.648761 |
| C | -1.185023 | 1.573808  | 0.122915  |
| C | 0.162111  | 1.568822  | 0.483670  |
| O | 0.697324  | 2.593405  | 1.221905  |
| H | -0.000174 | 3.229931  | 1.426787  |
| H | -1.824687 | 2.395191  | 0.441423  |
| C | -3.172156 | 0.501671  | -0.993086 |
| H | -3.315534 | -0.033079 | -1.940651 |
| H | -3.541792 | 1.525289  | -1.136840 |
| C | -4.009937 | -0.182158 | 0.098863  |
| C | -5.495194 | -0.244524 | -0.250509 |
| C | -6.339933 | -0.903751 | 0.839695  |
| C | -7.821942 | -0.973498 | 0.474727  |
| H | -8.409948 | -1.443535 | 1.270203  |
| H | -7.971362 | -1.555160 | -0.442388 |
| H | -8.229826 | 0.029506  | 0.302825  |
| H | -5.957825 | -1.916473 | 1.029221  |
| H | -6.215980 | -0.345579 | 1.778041  |
| H | -5.623694 | -0.796613 | -1.193284 |
| H | -5.870063 | 0.773399  | -0.434051 |
| H | -3.624638 | -1.198707 | 0.261009  |
| H | -3.874208 | 0.359187  | 1.045811  |
| H | -1.238534 | -1.324705 | -1.648507 |
| O | 1.244393  | -1.529110 | -1.144619 |
| H | 2.110274  | -1.520367 | -0.690272 |

**Table S85.** Coordinates for global minimum of **6c<sup>‡</sup>**.

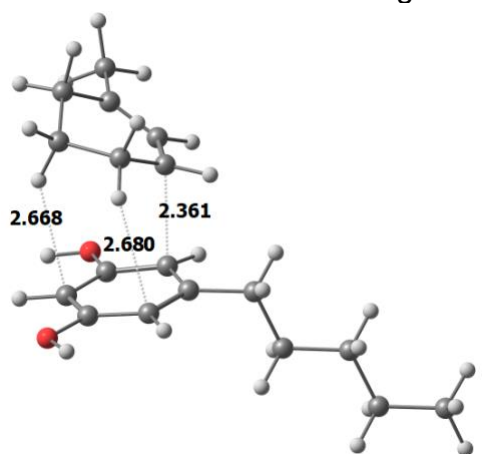

|   |          |          |           |
|---|----------|----------|-----------|
| C | 1.356270 | 1.032773 | -0.937339 |
|---|----------|----------|-----------|

|   |           |           |           |
|---|-----------|-----------|-----------|
| C | 2.089592  | 1.912808  | -0.119212 |
| C | 3.454632  | 1.840041  | -0.037814 |
| C | 4.238697  | 2.857915  | 0.703166  |
| H | 3.614627  | 3.658321  | 1.105379  |
| H | 4.772953  | 2.367354  | 1.528880  |
| H | 5.015986  | 3.283423  | 0.055362  |
| C | 4.215705  | 0.789259  | -0.776389 |
| C | 3.377772  | -0.446305 | -1.086986 |
| H | 3.216813  | -1.010562 | -0.162368 |
| H | 3.915056  | -1.105483 | -1.775346 |
| C | 2.027302  | -0.057956 | -1.682554 |
| H | 1.356377  | -0.922648 | -1.778745 |
| H | 4.575894  | 1.261102  | -1.707060 |
| H | 5.119867  | 0.526276  | -0.214407 |
| H | 1.566117  | 2.723673  | 0.381075  |
| H | 0.405999  | 1.385583  | -1.326667 |
| C | 0.219620  | -2.677098 | 0.049716  |
| C | 1.071832  | -2.099674 | 0.990440  |
| C | 0.902574  | -0.758141 | 1.299595  |
| C | -0.077433 | 0.022209  | 0.642455  |
| C | -0.984573 | -0.605107 | -0.245227 |
| C | -0.808195 | -1.936511 | -0.566401 |
| H | -1.471841 | -2.427138 | -1.275508 |
| H | -0.298777 | 1.012709  | 1.029029  |
| O | 1.666317  | -0.114125 | 2.204642  |
| H | 2.330728  | -0.713758 | 2.576526  |
| H | 1.842539  | -2.699299 | 1.466693  |
| O | 0.422519  | -3.980084 | -0.231671 |
| H | -0.226959 | -4.288320 | -0.880550 |
| H | 2.147203  | 0.318443  | -2.714663 |
| C | -2.140309 | 0.176574  | -0.798389 |
| H | -2.427782 | -0.227204 | -1.776519 |
| H | -1.850395 | 1.225508  | -0.943567 |
| C | -3.353147 | 0.126932  | 0.148344  |
| H | -3.648105 | -0.921259 | 0.293567  |
| H | -3.057153 | 0.511374  | 1.134244  |
| C | -4.537757 | 0.929827  | -0.384405 |
| H | -4.818657 | 0.548935  | -1.377164 |
| H | -4.233476 | 1.976957  | -0.527715 |
| C | -5.753277 | 0.877564  | 0.540616  |
| H | -6.054867 | -0.169548 | 0.680911  |
| H | -5.468183 | 1.253464  | 1.532977  |
| C | -6.933761 | 1.685489  | 0.004304  |
| H | -7.252293 | 1.309897  | -0.974948 |
| H | -7.793812 | 1.633810  | 0.680020  |
| H | -6.663223 | 2.740989  | -0.115508 |

**Table S86.** Coordinates for global minimum of **6c**.

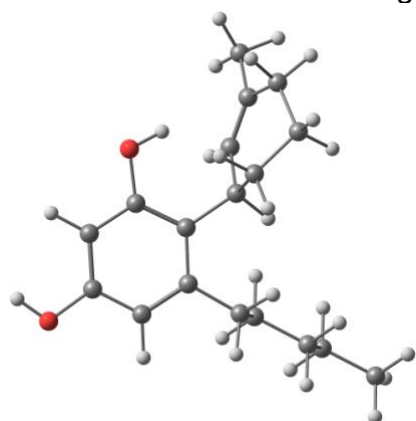

|   |           |           |           |
|---|-----------|-----------|-----------|
| C | -0.786761 | -0.739488 | -0.387635 |
| C | -1.465585 | -1.387792 | 0.800723  |
| C | -2.467300 | -2.276438 | 0.716879  |
| C | -3.114500 | -2.864955 | 1.934974  |
| H | -2.715315 | -2.433932 | 2.857391  |
| H | -4.199538 | -2.698688 | 1.910292  |
| H | -2.966099 | -3.952214 | 1.961454  |
| C | -3.004950 | -2.740279 | -0.613275 |
| C | -2.057994 | -2.425138 | -1.771154 |
| C | -1.578256 | -0.978610 | -1.687104 |
| H | -2.445736 | -0.304201 | -1.718469 |
| H | -0.943519 | -0.720394 | -2.543137 |
| H | -1.190469 | -3.098227 | -1.723989 |
| H | -2.557713 | -2.610324 | -2.729090 |
| H | -3.986110 | -2.268858 | -0.783162 |
| H | -3.202069 | -3.819641 | -0.557013 |
| H | -1.085385 | -1.108120 | 1.785348  |
| H | 0.184783  | -1.238052 | -0.497162 |
| C | -0.518876 | 0.741171  | -0.172361 |
| C | -1.541405 | 1.588083  | 0.296011  |
| C | -1.352959 | 2.961880  | 0.446626  |
| C | -0.122216 | 3.514273  | 0.113374  |
| C | 0.908843  | 2.705921  | -0.357766 |
| C | 0.716420  | 1.331089  | -0.502993 |
| C | 1.885793  | 0.502111  | -0.979689 |
| C | 2.644503  | -0.161293 | 0.180621  |
| C | 3.793569  | -1.045063 | -0.298755 |
| C | 4.563970  | -1.700939 | 0.846720  |
| C | 5.707000  | -2.587689 | 0.355427  |
| H | 5.329003  | -3.392581 | -0.285746 |
| H | 6.245951  | -3.047989 | 1.190254  |
| H | 6.428294  | -2.006299 | -0.230701 |
| H | 4.960568  | -0.918911 | 1.508945  |
| H | 3.867889  | -2.296330 | 1.453759  |



|   |           |           |           |
|---|-----------|-----------|-----------|
| H | 3.396216  | -1.826570 | -0.963531 |
| H | 4.486801  | -0.444994 | -0.906698 |
| H | 3.029689  | 0.625043  | 0.844764  |
| H | 1.946489  | -0.759277 | 0.783453  |
| H | 1.556282  | -0.267867 | -1.688488 |
| H | 2.580115  | 1.150365  | -1.527712 |
| H | 1.863613  | 3.156862  | -0.614054 |
| O | 0.131590  | 4.854655  | 0.231937  |
| H | -0.658159 | 5.302257  | 0.563135  |
| H | -2.168811 | 3.577024  | 0.818267  |
| O | -2.789534 | 1.125144  | 0.612902  |
| H | -2.760712 | 0.149813  | 0.679206  |

**Table S87.** Coordinates for global minimum of **3d<sup>‡</sup>**.

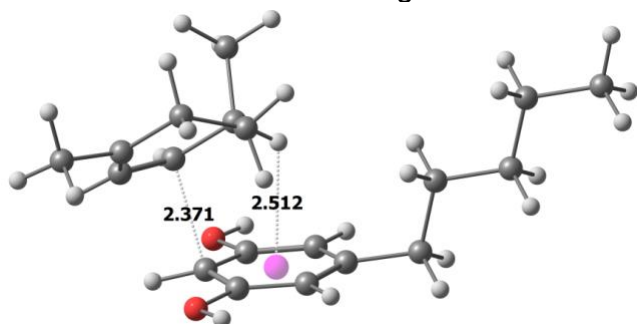

|   |           |           |           |
|---|-----------|-----------|-----------|
| C | 2.080794  | 0.052729  | 1.015761  |
| C | 3.225746  | 0.498324  | 0.334974  |
| C | 3.262545  | 1.722022  | -0.283027 |
| C | 4.516699  | 2.245637  | -0.875401 |
| H | 4.722550  | 3.255881  | -0.499560 |
| H | 5.373970  | 1.596970  | -0.685939 |
| H | 4.379269  | 2.352336  | -1.960790 |
| C | 2.067449  | 2.611283  | -0.306216 |
| C | 0.755771  | 1.866699  | -0.078904 |
| H | 0.501767  | 1.316292  | -0.990722 |
| H | -0.057028 | 2.577780  | 0.101824  |
| C | 0.844833  | 0.878897  | 1.088133  |
| H | -0.027124 | 0.210424  | 1.063726  |
| H | 2.237538  | 3.379340  | 0.467171  |
| H | 2.045769  | 3.166336  | -1.252340 |
| H | 4.128622  | -0.106141 | 0.374925  |
| H | 2.221440  | -0.684660 | 1.803190  |
| C | 1.095703  | -1.323333 | -1.364155 |
| C | 1.592559  | -1.928650 | -0.190711 |
| C | 0.667925  | -2.483275 | 0.720995  |
| C | -0.695678 | -2.319688 | 0.537794  |
| C | -1.166313 | -1.650383 | -0.601554 |
| C | -0.270560 | -1.164164 | -1.557804 |
| H | -0.641269 | -0.662513 | -2.448853 |

|   |           |           |           |
|---|-----------|-----------|-----------|
| H | -1.397965 | -2.712374 | 1.269464  |
| O | 1.206141  | -3.122512 | 1.785090  |
| H | 0.503374  | -3.436120 | 2.373013  |
| H | 2.640954  | -2.199382 | -0.123378 |
| O | 2.025447  | -0.886688 | -2.239703 |
| H | 1.596616  | -0.453533 | -2.992908 |
| C | -2.634959 | -1.386674 | -0.759566 |
| H | -3.212351 | -2.172741 | -0.258748 |
| H | -2.902065 | -1.398728 | -1.823327 |
| C | -3.015389 | -0.018585 | -0.162292 |
| H | -2.739251 | -0.003721 | 0.901540  |
| H | -2.418615 | 0.763215  | -0.653317 |
| C | -4.501753 | 0.293665  | -0.315712 |
| H | -5.092485 | -0.492307 | 0.176826  |
| H | -4.772144 | 0.264402  | -1.381294 |
| C | -4.883002 | 1.654611  | 0.266451  |
| H | -4.609404 | 1.681386  | 1.330344  |
| H | -4.288467 | 2.436599  | -0.226067 |
| C | -6.370735 | 1.964270  | 0.109370  |
| H | -6.659543 | 1.969530  | -0.948022 |
| H | -6.983080 | 1.210858  | 0.618179  |
| H | -6.622639 | 2.942809  | 0.531286  |
| C | 0.837521  | 1.575387  | 2.469772  |
| H | 1.696074  | 2.244926  | 2.583129  |
| H | -0.080057 | 2.163815  | 2.565419  |
| H | 0.865796  | 0.840240  | 3.279441  |

**Table S88.** Coordinates for global minimum of **3d**.

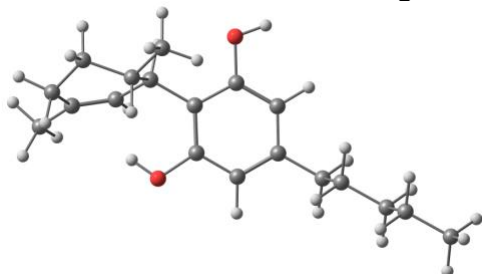

|   |          |           |           |
|---|----------|-----------|-----------|
| C | 2.378911 | 0.507923  | 0.582750  |
| C | 3.306190 | -0.680668 | 0.738847  |
| C | 4.391134 | -0.911907 | -0.014061 |
| C | 5.245859 | -2.130660 | 0.167852  |
| H | 5.336853 | -2.679552 | -0.778759 |
| H | 4.838364 | -2.805995 | 0.925346  |
| H | 6.264291 | -1.845691 | 0.461736  |
| C | 4.818045 | 0.049068  | -1.092552 |
| C | 4.145307 | 1.412413  | -0.955238 |
| C | 2.637926 | 1.271358  | -0.738518 |
| C | 1.940166 | 2.628656  | -0.745143 |

|   |           |           |           |
|---|-----------|-----------|-----------|
| H | 0.862860  | 2.525030  | -0.577727 |
| H | 2.089019  | 3.135301  | -1.705095 |
| H | 2.345590  | 3.272320  | 0.045293  |
| H | 2.232490  | 0.666484  | -1.565073 |
| H | 4.338710  | 2.021531  | -1.847015 |
| H | 4.576296  | 1.951252  | -0.098458 |
| H | 5.911599  | 0.152196  | -1.063084 |
| H | 4.589578  | -0.393840 | -2.074997 |
| H | 3.049056  | -1.388307 | 1.529169  |
| H | 2.590298  | 1.202586  | 1.407830  |
| C | 0.925010  | 0.092776  | 0.710520  |
| C | 0.392718  | -0.974835 | -0.032172 |
| C | -0.955845 | -1.325866 | 0.039879  |
| C | -1.820728 | -0.615760 | 0.868163  |
| C | -1.316295 | 0.438807  | 1.629791  |
| C | 0.033766  | 0.779426  | 1.547534  |
| O | 0.542165  | 1.814249  | 2.290113  |
| H | -0.170107 | 2.202112  | 2.815336  |
| H | -1.974687 | 0.999089  | 2.291384  |
| C | -3.290280 | -0.946034 | 0.905621  |
| H | -3.689260 | -0.740125 | 1.907337  |
| H | -3.432786 | -2.016653 | 0.711258  |
| C | -4.091764 | -0.138651 | -0.127088 |
| C | -5.584664 | -0.459002 | -0.096064 |
| C | -6.389710 | 0.340196  | -1.120369 |
| C | -7.882336 | 0.016936  | -1.078309 |
| H | -8.302299 | 0.237840  | -0.090055 |
| H | -8.058192 | -1.045189 | -1.284767 |
| H | -8.440527 | 0.600003  | -1.818464 |
| H | -6.238675 | 1.413478  | -0.939585 |
| H | -5.995605 | 0.137876  | -2.125962 |
| H | -5.730461 | -1.534097 | -0.277641 |
| H | -5.978696 | -0.259200 | 0.911479  |
| H | -3.939797 | 0.933684  | 0.060381  |
| H | -3.689512 | -0.341149 | -1.129716 |
| H | -1.313714 | -2.162022 | -0.555153 |
| O | 1.167857  | -1.720213 | -0.878908 |
| H | 2.109958  | -1.545240 | -0.687798 |

**Table S89.** Coordinates for global minimum of **6d<sup>‡</sup>**.

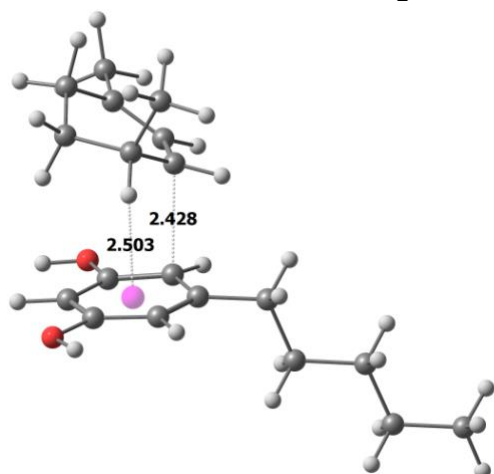

|   |           |           |           |
|---|-----------|-----------|-----------|
| C | -1.304846 | -1.090166 | -0.653188 |
| C | -1.995771 | -1.875552 | 0.280332  |
| C | -3.356265 | -1.775342 | 0.432224  |
| C | -4.101887 | -2.701731 | 1.316495  |
| H | -4.936177 | -3.161501 | 0.771444  |
| H | -3.465357 | -3.478066 | 1.745008  |
| H | -4.560314 | -2.121830 | 2.130147  |
| C | -4.145861 | -0.788354 | -0.357132 |
| C | -3.308617 | 0.384877  | -0.855091 |
| H | -3.084180 | 1.038073  | -0.005385 |
| H | -3.879404 | 0.979690  | -1.575489 |
| C | -1.991321 | -0.072382 | -1.489655 |
| H | -1.321967 | 0.793847  | -1.600556 |
| H | -4.596086 | -1.348676 | -1.193762 |
| H | -4.997074 | -0.439262 | 0.240086  |
| H | -1.453508 | -2.642655 | 0.827564  |
| H | -0.355941 | -1.467316 | -1.024334 |
| C | -0.101559 | 2.710429  | -0.071869 |
| C | -0.913819 | 2.232653  | 0.956197  |
| C | -0.724253 | 0.930099  | 1.396946  |
| C | 0.241293  | 0.093215  | 0.797315  |
| C | 1.101716  | 0.619254  | -0.192268 |
| C | 0.905032  | 1.910272  | -0.645606 |
| H | 1.536071  | 2.321762  | -1.430479 |
| H | 0.465135  | -0.863546 | 1.259627  |
| O | -1.458096 | 0.380462  | 2.387733  |
| H | -2.111317 | 1.016200  | 2.715739  |
| H | -1.671519 | 2.875779  | 1.395124  |
| O | -0.324316 | 3.977425  | -0.481539 |
| H | 0.294384  | 4.215579  | -1.187475 |
| C | 2.234292  | -0.218255 | -0.711982 |
| H | 2.498919  | 0.103312  | -1.726232 |
| H | 1.927690  | -1.271266 | -0.767241 |

|   |           |           |           |
|---|-----------|-----------|-----------|
| C | 3.473370  | -0.113329 | 0.194810  |
| H | 3.784763  | 0.938696  | 0.251781  |
| H | 3.199793  | -0.417202 | 1.214710  |
| C | 4.633321  | -0.971132 | -0.305526 |
| H | 4.895977  | -0.667613 | -1.329449 |
| H | 4.310819  | -2.020955 | -0.365494 |
| C | 5.871444  | -0.872201 | 0.585067  |
| H | 6.191270  | 0.177352  | 0.642955  |
| H | 5.604602  | -1.171608 | 1.607976  |
| C | 7.027130  | -1.735137 | 0.081500  |
| H | 7.328768  | -1.434918 | -0.928685 |
| H | 7.903302  | -1.649997 | 0.732686  |
| H | 6.738453  | -2.791913 | 0.042828  |
| C | -2.175024 | -0.676984 | -2.902025 |
| H | -2.644615 | 0.068756  | -3.550373 |
| H | -1.210535 | -0.957712 | -3.335654 |
| H | -2.811696 | -1.567163 | -2.874554 |

**Table S90.** Coordinates for global minimum of **6d**.

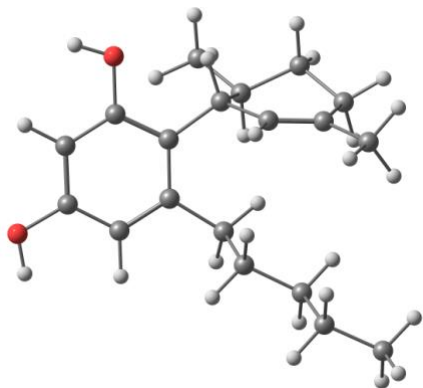

|   |           |           |           |
|---|-----------|-----------|-----------|
| C | -0.713990 | -1.461184 | -0.358923 |
| C | 0.633877  | -1.371705 | -1.036736 |
| C | 1.723625  | -2.054639 | -0.675120 |
| C | 3.041403  | -1.896237 | -1.375937 |
| H | 3.352918  | -2.838107 | -1.847070 |
| H | 3.829995  | -1.631813 | -0.658048 |
| H | 3.000548  | -1.118124 | -2.144412 |
| C | 1.691228  | -3.016514 | 0.484368  |
| C | 0.268431  | -3.438426 | 0.845985  |
| C | -0.661794 | -2.231569 | 0.982322  |
| C | -2.058756 | -2.652465 | 1.433758  |
| H | -2.729343 | -1.789740 | 1.511614  |
| H | -2.019289 | -3.142999 | 2.412865  |
| H | -2.498287 | -3.357692 | 0.717428  |
| H | -0.240430 | -1.567010 | 1.750349  |
| H | 0.268481  | -4.014616 | 1.780281  |
| H | -0.124931 | -4.101288 | 0.060699  |

|   |           |           |           |
|---|-----------|-----------|-----------|
| H | 2.300758  | -3.898199 | 0.240715  |
| H | 2.182893  | -2.547848 | 1.353165  |
| H | 0.691212  | -0.692972 | -1.888361 |
| H | -1.355867 | -2.055225 | -1.024554 |
| C | -1.390438 | -0.102487 | -0.220561 |
| C | -2.695883 | 0.070472  | -0.721109 |
| C | -3.391725 | 1.271120  | -0.604600 |
| C | -2.781341 | 2.342667  | 0.037398  |
| C | -1.494237 | 2.210453  | 0.544524  |
| C | -0.797254 | 1.002837  | 0.417819  |
| C | 0.612444  | 0.980988  | 0.963327  |
| H | 0.971030  | -0.042110 | 1.083558  |
| H | 0.614717  | 1.445611  | 1.958829  |
| C | 1.606372  | 1.733096  | 0.064552  |
| C | 3.046452  | 1.576257  | 0.545945  |
| C | 4.062244  | 2.272244  | -0.358451 |
| C | 5.501905  | 2.076793  | 0.113556  |
| H | 5.762930  | 1.012059  | 0.135752  |
| H | 6.214149  | 2.583387  | -0.546355 |
| H | 5.639843  | 2.474177  | 1.125961  |
| H | 3.829507  | 3.345115  | -0.406948 |
| H | 3.954129  | 1.885662  | -1.381755 |
| H | 3.287577  | 0.503991  | 0.601141  |
| H | 3.138083  | 1.967717  | 1.570154  |
| H | 1.337116  | 2.797641  | 0.024904  |
| H | 1.522651  | 1.348611  | -0.960612 |
| H | -1.022712 | 3.051860  | 1.049297  |
| O | -3.502579 | 3.501888  | 0.142788  |
| H | -2.974428 | 4.164380  | 0.608030  |
| H | -4.399770 | 1.372672  | -0.999623 |
| O | -3.288476 | -0.999878 | -1.341298 |
| H | -4.174252 | -0.745698 | -1.631706 |

**Table S91.** Coordinates for global minimum of  $3e^\ddagger$ .

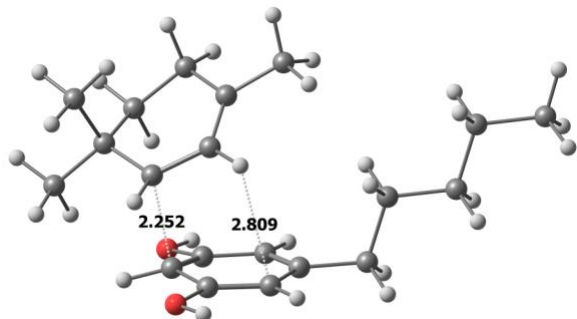

|   |           |           |           |
|---|-----------|-----------|-----------|
| C | -2.050001 | -0.174606 | -0.867092 |
| C | -0.783866 | -0.802453 | -1.015449 |
| C | -0.473829 | -1.971040 | -0.384543 |
| C | 0.788826  | -2.700166 | -0.679187 |

|   |           |           |           |
|---|-----------|-----------|-----------|
| H | 1.381288  | -2.805098 | 0.239153  |
| H | 0.560354  | -3.721117 | -1.011817 |
| H | 1.392407  | -2.198410 | -1.438090 |
| C | -1.427224 | -2.627423 | 0.555873  |
| C | -2.572594 | -1.727830 | 1.008617  |
| H | -2.211472 | -1.046542 | 1.786156  |
| H | -3.370467 | -2.331200 | 1.456451  |
| C | -3.154973 | -0.892319 | -0.138550 |
| H | -1.807122 | -3.524972 | 0.040794  |
| H | -0.870176 | -3.016625 | 1.418226  |
| H | -0.072531 | -0.374316 | -1.716222 |
| H | -2.381411 | 0.454435  | -1.692411 |
| C | -1.025707 | 1.500155  | 1.352003  |
| C | -1.635080 | 1.812341  | 0.108958  |
| C | -0.789161 | 2.270256  | -0.939190 |
| C | 0.588569  | 2.206308  | -0.825988 |
| C | 1.159283  | 1.748911  | 0.367274  |
| C | 0.350185  | 1.401953  | 1.458255  |
| H | 0.807332  | 1.108076  | 2.400286  |
| H | 1.222802  | 2.510872  | -1.655098 |
| O | -1.423237 | 2.702014  | -2.046469 |
| H | -0.779059 | 2.933975  | -2.732336 |
| H | -2.681995 | 2.095374  | 0.087455  |
| O | -1.860936 | 1.304937  | 2.393613  |
| H | -1.356924 | 1.066116  | 3.186403  |
| C | 2.647648  | 1.603169  | 0.474077  |
| H | 2.966225  | 1.796728  | 1.505363  |
| H | 3.141178  | 2.335159  | -0.176000 |
| C | 3.088686  | 0.184728  | 0.069229  |
| H | 2.573194  | -0.543604 | 0.709912  |
| H | 2.757757  | -0.011757 | -0.959901 |
| C | 4.598032  | -0.013756 | 0.174596  |
| H | 4.921063  | 0.185858  | 1.206551  |
| H | 5.109580  | 0.723677  | -0.460729 |
| C | 5.033311  | -1.422327 | -0.230129 |
| H | 4.511350  | -2.155859 | 0.400350  |
| H | 4.710597  | -1.616232 | -1.262514 |
| C | 6.542822  | -1.626311 | -0.114615 |
| H | 6.880912  | -1.464451 | 0.915435  |
| H | 6.833517  | -2.640108 | -0.408753 |
| H | 7.082720  | -0.921490 | -0.757318 |
| C | -4.269399 | 0.027624  | 0.368724  |
| H | -4.612997 | 0.702245  | -0.423524 |
| H | -5.120536 | -0.583383 | 0.686384  |
| H | -3.943000 | 0.620355  | 1.226190  |
| C | -3.775525 | -1.809626 | -1.233010 |
| H | -3.040962 | -2.488016 | -1.674993 |

|   |           |           |           |
|---|-----------|-----------|-----------|
| H | -4.571050 | -2.402978 | -0.769341 |
| H | -4.215711 | -1.207676 | -2.034206 |

**Table S92.** Coordinates for global minimum of **3e**.

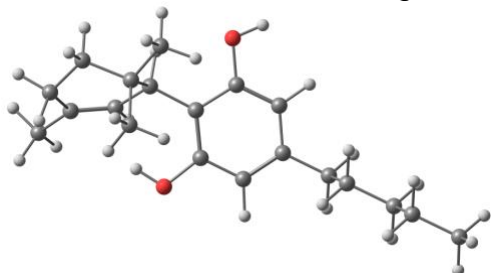

|   |           |           |           |
|---|-----------|-----------|-----------|
| C | -2.300866 | -0.480219 | 0.272522  |
| C | -3.133153 | 0.475849  | 1.103107  |
| C | -4.275049 | 1.051951  | 0.702288  |
| C | -5.045666 | 1.993964  | 1.578396  |
| H | -4.534435 | 2.179250  | 2.527276  |
| H | -6.045565 | 1.593586  | 1.789902  |
| H | -5.195818 | 2.954820  | 1.068617  |
| C | -4.857944 | 0.770405  | -0.655174 |
| C | -4.219480 | -0.447632 | -1.320148 |
| C | -2.682122 | -0.436405 | -1.243186 |
| C | -2.135878 | 0.801347  | -1.966138 |
| H | -2.491783 | 1.739431  | -1.530925 |
| H | -1.040976 | 0.813381  | -1.950968 |
| H | -2.459873 | 0.778986  | -3.013469 |
| C | -2.140858 | -1.681720 | -1.952507 |
| H | -2.528920 | -2.597942 | -1.494356 |
| H | -1.047005 | -1.717069 | -1.907624 |
| H | -2.438395 | -1.669378 | -3.007770 |
| H | -4.584152 | -1.358670 | -0.824792 |
| H | -4.527883 | -0.508426 | -2.372013 |
| H | -4.754894 | 1.666638  | -1.285827 |
| H | -5.940825 | 0.616365  | -0.548216 |
| H | -2.779115 | 0.662050  | 2.119324  |
| H | -2.562797 | -1.493334 | 0.609785  |
| C | -0.814156 | -0.324887 | 0.550040  |
| C | -0.180141 | 0.924057  | 0.685181  |
| C | 1.192029  | 1.037518  | 0.919075  |
| C | 1.982133  | -0.100731 | 1.041755  |
| C | 1.377577  | -1.353798 | 0.946105  |
| C | 0.006274  | -1.454352 | 0.713628  |
| O | -0.596414 | -2.683935 | 0.648745  |
| H | 0.071041  | -3.367325 | 0.794330  |
| H | 1.971375  | -2.259198 | 1.059874  |
| C | 3.471835  | 0.015168  | 1.232308  |
| H | 3.701476  | 0.934085  | 1.786751  |



|   |           |           |           |
|---|-----------|-----------|-----------|
| H | 3.833759  | -0.827759 | 1.835381  |
| C | 4.228934  | 0.033951  | -0.104360 |
| C | 5.741172  | 0.145009  | 0.077171  |
| C | 6.503832  | 0.171440  | -1.246903 |
| C | 8.015461  | 0.280241  | -1.054115 |
| H | 8.397942  | -0.568718 | -0.475483 |
| H | 8.276060  | 1.196852  | -0.512153 |
| H | 8.542571  | 0.296788  | -2.013962 |
| H | 6.268956  | -0.738103 | -1.817154 |
| H | 6.146644  | 1.016110  | -1.852248 |
| H | 5.973127  | 1.056170  | 0.648386  |
| H | 6.097984  | -0.699799 | 0.684903  |
| H | 3.989451  | -0.880676 | -0.665128 |
| H | 3.865674  | 0.876166  | -0.710108 |
| H | 1.625329  | 2.029992  | 1.011051  |
| O | -0.861436 | 2.105797  | 0.597224  |
| H | -1.820784 | 1.925745  | 0.583405  |

**Table S93.** Coordinates for global minimum of  $6e^{\ddagger}$ .

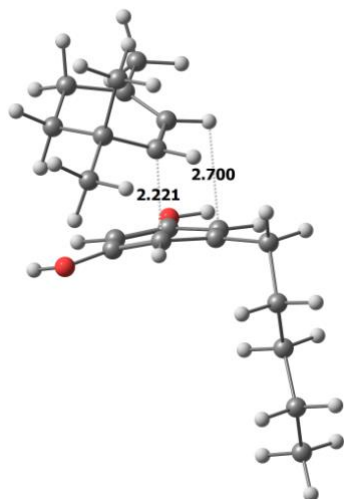

|   |           |           |           |
|---|-----------|-----------|-----------|
| C | -1.452366 | -0.835076 | 0.797725  |
| C | -1.763930 | 0.470528  | 1.267089  |
| C | -2.836935 | 1.173052  | 0.810542  |
| C | -3.152147 | 2.529332  | 1.335006  |
| H | -3.085781 | 3.259621  | 0.516839  |
| H | -4.187153 | 2.571084  | 1.697155  |
| H | -2.473212 | 2.832150  | 2.135253  |
| C | -3.793686 | 0.589024  | -0.174874 |
| C | -3.283980 | -0.660180 | -0.893299 |
| H | -2.639104 | -0.357825 | -1.722683 |
| H | -4.126266 | -1.207382 | -1.332033 |
| C | -2.496890 | -1.603946 | 0.025957  |
| H | -4.715389 | 0.370984  | 0.389757  |
| H | -4.086403 | 1.361001  | -0.898327 |

|   |           |           |           |
|---|-----------|-----------|-----------|
| H | -1.130349 | 0.915516  | 2.027756  |
| H | -0.837452 | -1.453867 | 1.448655  |
| C | 0.460689  | 2.217512  | -0.336875 |
| C | -0.098874 | 1.587700  | -1.452595 |
| C | -0.046353 | 0.208929  | -1.516805 |
| C | 0.395622  | -0.556900 | -0.401622 |
| C | 1.135997  | 0.113461  | 0.624123  |
| C | 1.130386  | 1.486815  | 0.667030  |
| H | 1.636548  | 2.019896  | 1.468466  |
| H | 0.563338  | -1.618893 | -0.555712 |
| O | -0.414244 | -0.480185 | -2.614459 |
| H | -0.727893 | 0.126111  | -3.302634 |
| H | -0.508489 | 2.182744  | -2.264044 |
| O | 0.383912  | 3.557381  | -0.301306 |
| H | 0.827234  | 3.901577  | 0.489066  |
| C | 1.883732  | -0.697427 | 1.640020  |
| H | 1.218691  | -1.457666 | 2.071535  |
| H | 2.208959  | -0.044587 | 2.457753  |
| C | 3.110253  | -1.409591 | 1.035046  |
| H | 3.577821  | -2.004896 | 1.829982  |
| H | 2.781657  | -2.119257 | 0.264050  |
| C | 4.137498  | -0.447598 | 0.443391  |
| H | 4.423346  | 0.293719  | 1.204619  |
| H | 3.681540  | 0.118270  | -0.381920 |
| C | 5.388635  | -1.160951 | -0.067513 |
| H | 5.847696  | -1.721329 | 0.758612  |
| H | 5.095917  | -1.905250 | -0.821005 |
| C | 6.410956  | -0.196533 | -0.665908 |
| H | 7.298913  | -0.726706 | -1.025641 |
| H | 5.981969  | 0.353440  | -1.511634 |
| H | 6.737138  | 0.538475  | 0.078860  |
| C | -3.424758 | -2.178143 | 1.133822  |
| H | -2.869551 | -2.853065 | 1.793417  |
| H | -3.873200 | -1.390524 | 1.745294  |
| H | -4.224684 | -2.750060 | 0.650812  |
| C | -1.925905 | -2.790611 | -0.755489 |
| H | -1.306463 | -3.419519 | -0.105865 |
| H | -2.749798 | -3.404021 | -1.135075 |
| H | -1.326701 | -2.464479 | -1.607394 |

**Table S94.** Coordinates for global minimum of **6e**.

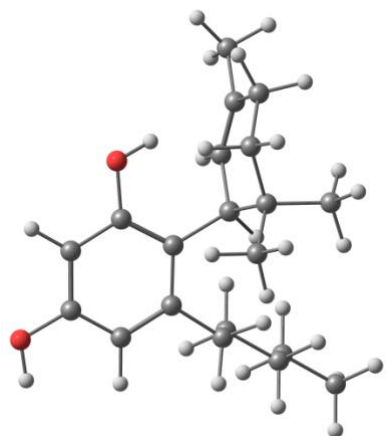

|   |           |           |           |
|---|-----------|-----------|-----------|
| C | -0.668586 | -0.700314 | -0.135263 |
| C | -1.281999 | -1.299798 | 1.110525  |
| C | -2.463195 | -1.931720 | 1.179828  |
| C | -2.962674 | -2.552306 | 2.451185  |
| H | -3.164557 | -3.620870 | 2.299942  |
| H | -3.912490 | -2.095155 | 2.756793  |
| H | -2.242652 | -2.446501 | 3.267348  |
| C | -3.359589 | -2.058020 | -0.020831 |
| C | -2.970102 | -1.113578 | -1.155517 |
| H | -3.300174 | -0.094541 | -0.917668 |
| C | -1.457338 | -1.097369 | -1.433168 |
| C | -1.193662 | -0.128862 | -2.589834 |
| H | -0.127263 | -0.055618 | -2.826731 |
| H | -1.558465 | 0.877162  | -2.357145 |
| H | -1.713646 | -0.483058 | -3.488032 |
| C | -0.993038 | -2.503340 | -1.846713 |
| H | -1.062323 | -3.212748 | -1.014874 |
| H | 0.051899  | -2.475790 | -2.177904 |
| H | -1.603475 | -2.883943 | -2.674290 |
| H | -3.494454 | -1.404132 | -2.075207 |
| H | -4.398904 | -1.874156 | 0.285690  |
| H | -3.338373 | -3.104878 | -0.361182 |
| H | -0.673193 | -1.221402 | 2.013276  |
| H | 0.306039  | -1.195434 | -0.221633 |
| C | -0.354329 | 0.784412  | 0.026455  |
| C | -1.281775 | 1.692820  | 0.577157  |
| C | -1.026223 | 3.060858  | 0.653484  |
| C | 0.184531  | 3.550535  | 0.186539  |
| C | 1.141870  | 2.679406  | -0.327852 |
| C | 0.881873  | 1.309180  | -0.404431 |
| C | 2.003139  | 0.423024  | -0.898323 |
| H | 2.675215  | 1.017704  | -1.528803 |
| H | 1.627321  | -0.388462 | -1.531228 |
| C | 2.817727  | -0.177846 | 0.258948  |

|   |           |           |           |
|---|-----------|-----------|-----------|
| C | 3.912209  | -1.125005 | -0.226795 |
| C | 4.735744  | -1.725164 | 0.912277  |
| C | 5.822284  | -2.676771 | 0.414872  |
| H | 6.400288  | -3.096103 | 1.245155  |
| H | 5.384811  | -3.511331 | -0.145405 |
| H | 6.520417  | -2.158196 | -0.252529 |
| H | 4.064016  | -2.256966 | 1.600442  |
| H | 5.193042  | -0.912847 | 1.494004  |
| H | 3.454464  | -1.937403 | -0.811006 |
| H | 4.580731  | -0.588157 | -0.916115 |
| H | 2.145446  | -0.713009 | 0.944700  |
| H | 3.261768  | 0.640948  | 0.842080  |
| H | 2.099113  | 3.067905  | -0.670256 |
| O | 0.391640  | 4.901389  | 0.268738  |
| H | 1.269521  | 5.109021  | -0.077854 |
| H | -1.769159 | 3.726637  | 1.081398  |
| O | -2.498034 | 1.302976  | 1.066644  |
| H | -2.485368 | 0.332502  | 1.189378  |

**Table S95.** Coordinates for global minimum of **3<sup>‡</sup>**.

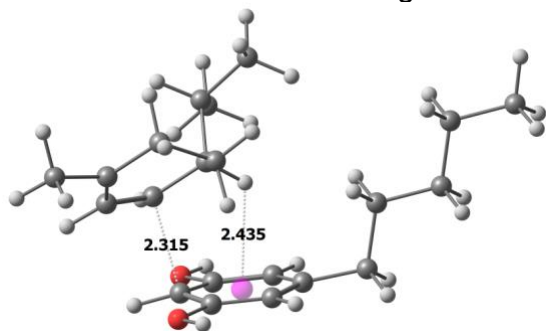

|   |           |           |           |
|---|-----------|-----------|-----------|
| C | 2.014603  | 0.171281  | 0.680813  |
| C | 3.201051  | 0.413855  | -0.045410 |
| C | 3.275969  | 1.396548  | -0.994252 |
| C | 4.568557  | 1.771395  | -1.618983 |
| H | 4.735956  | 2.851961  | -1.525089 |
| H | 5.414115  | 1.228655  | -1.192124 |
| H | 4.516879  | 1.567925  | -2.697707 |
| C | 2.068527  | 2.183969  | -1.375597 |
| C | 0.775338  | 1.453120  | -1.040580 |
| H | 0.679526  | 0.593024  | -1.711595 |
| H | -0.091083 | 2.091186  | -1.228369 |
| C | 0.766615  | 0.936350  | 0.401741  |
| H | -0.102013 | 0.274015  | 0.532753  |
| H | 2.134715  | 3.150811  | -0.848458 |
| H | 2.117759  | 2.433870  | -2.442747 |
| H | 4.104161  | -0.118297 | 0.243840  |
| H | 2.142288  | -0.226468 | 1.683154  |
| C | 1.128601  | -1.957443 | -1.060173 |

|   |           |           |           |
|---|-----------|-----------|-----------|
| C | 1.626820  | -2.070795 | 0.256723  |
| C | 0.702848  | -2.293464 | 1.304905  |
| C | -0.660191 | -2.234597 | 1.073154  |
| C | -1.131957 | -2.018957 | -0.231081 |
| C | -0.238218 | -1.902264 | -1.299647 |
| H | -0.610521 | -1.759490 | -2.311629 |
| H | -1.362601 | -2.346762 | 1.895931  |
| O | 1.245741  | -2.492325 | 2.526550  |
| H | 0.546294  | -2.577017 | 3.191180  |
| H | 2.677965  | -2.286448 | 0.417499  |
| O | 2.058562  | -1.858527 | -2.031215 |
| H | 1.630446  | -1.739952 | -2.892353 |
| C | -2.599455 | -1.813318 | -0.463094 |
| H | -3.181241 | -2.409718 | 0.249731  |
| H | -2.867969 | -2.137172 | -1.475594 |
| C | -2.959848 | -0.324679 | -0.293931 |
| H | -2.681582 | -0.004510 | 0.720398  |
| H | -2.347909 | 0.269283  | -0.987977 |
| C | -4.439256 | -0.040322 | -0.537220 |
| H | -5.045636 | -0.633624 | 0.162324  |
| H | -4.713867 | -0.373843 | -1.548453 |
| C | -4.783823 | 1.440545  | -0.380189 |
| H | -4.504049 | 1.770975  | 0.629913  |
| H | -4.171563 | 2.028210  | -1.078485 |
| C | -6.263921 | 1.729117  | -0.624137 |
| H | -6.488378 | 2.794447  | -0.507416 |
| H | -6.558972 | 1.432471  | -1.637287 |
| H | -6.891876 | 1.173747  | 0.081965  |
| C | 0.614570  | 2.037279  | 1.510509  |
| H | 1.569402  | 2.575923  | 1.600711  |
| C | 0.277572  | 1.399842  | 2.862216  |
| C | -0.474318 | 3.045833  | 1.135782  |
| H | -0.648103 | 3.724183  | 1.977726  |
| H | -0.201685 | 3.654884  | 0.269573  |
| H | -1.419196 | 2.533215  | 0.914480  |
| H | -0.680131 | 0.867526  | 2.799800  |
| H | 0.182463  | 2.174657  | 3.629708  |
| H | 1.037045  | 0.691366  | 3.206056  |

**Table S96.** Coordinates for global minimum of **3**.

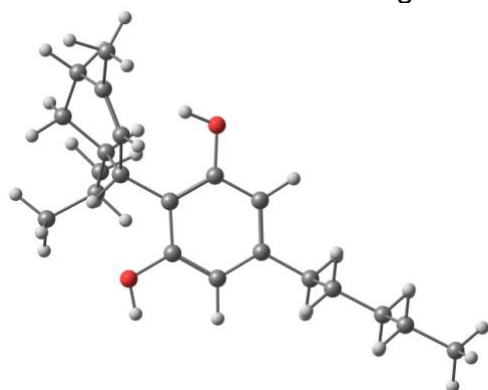

|   |           |           |           |
|---|-----------|-----------|-----------|
| C | -2.058155 | -0.125181 | -0.678657 |
| C | -2.358479 | -1.595818 | -0.890811 |
| C | -3.436874 | -2.238347 | -0.419945 |
| C | -3.646014 | -3.708648 | -0.628590 |
| H | -2.799233 | -4.172346 | -1.142255 |
| H | -4.555391 | -3.888268 | -1.216448 |
| H | -3.792288 | -4.215169 | 0.334541  |
| C | -4.509048 | -1.509040 | 0.345282  |
| C | -4.423753 | 0.002516  | 0.152570  |
| H | -5.123707 | 0.506342  | 0.829368  |
| H | -4.733862 | 0.248548  | -0.872291 |
| C | -2.996061 | 0.504515  | 0.383383  |
| H | -2.670313 | 0.128680  | 1.366943  |
| C | -2.878859 | 2.043203  | 0.434872  |
| C | -3.574631 | 2.744677  | -0.735567 |
| H | -3.328425 | 3.812352  | -0.735496 |
| H | -4.664594 | 2.657202  | -0.656863 |
| H | -3.269564 | 2.333632  | -1.703547 |
| C | -3.396533 | 2.594107  | 1.767092  |
| H | -2.869784 | 2.140019  | 2.614101  |
| H | -3.251805 | 3.679100  | 1.819580  |
| H | -4.468563 | 2.399448  | 1.890448  |
| H | -1.806004 | 2.279165  | 0.379773  |
| H | -5.490865 | -1.883944 | 0.024166  |
| H | -4.428383 | -1.768405 | 1.413112  |
| H | -1.619236 | -2.155322 | -1.467045 |
| H | -2.236296 | 0.385795  | -1.634058 |
| C | -0.595432 | 0.083401  | -0.328616 |
| C | 0.027942  | -0.634202 | 0.706547  |
| C | 1.352213  | -0.398416 | 1.076192  |
| C | 2.105241  | 0.564464  | 0.409490  |
| C | 1.519513  | 1.277545  | -0.636528 |
| C | 0.193298  | 1.033287  | -0.993794 |
| O | -0.398476 | 1.733649  | -2.013812 |
| H | 0.242318  | 2.356820  | -2.380891 |

|   |           |           |           |
|---|-----------|-----------|-----------|
| H | 2.092988  | 2.029941  | -1.175584 |
| C | 3.553497  | 0.779376  | 0.764767  |
| H | 3.700155  | 0.591388  | 1.836081  |
| H | 3.831073  | 1.824525  | 0.576325  |
| C | 4.488924  | -0.139631 | -0.036177 |
| C | 5.958089  | 0.043803  | 0.337694  |
| C | 6.896524  | -0.862668 | -0.458347 |
| C | 8.362344  | -0.681114 | -0.068069 |
| H | 9.017476  | -1.338452 | -0.649485 |
| H | 8.514845  | -0.908173 | 0.993501  |
| H | 8.687183  | 0.352227  | -0.237013 |
| H | 6.600526  | -1.910025 | -0.306558 |
| H | 6.771187  | -0.659072 | -1.530869 |
| H | 6.246838  | 1.093722  | 0.180635  |
| H | 6.086539  | -0.154175 | 1.412154  |
| H | 4.192372  | -1.184721 | 0.131128  |
| H | 4.351611  | 0.055999  | -1.109082 |
| H | 1.783386  | -0.980458 | 1.886557  |
| O | -0.639307 | -1.591067 | 1.422297  |
| H | -1.457229 | -1.832566 | 0.945334  |

**Table S97.** Coordinates for global minimum of **6<sup>‡</sup>**.

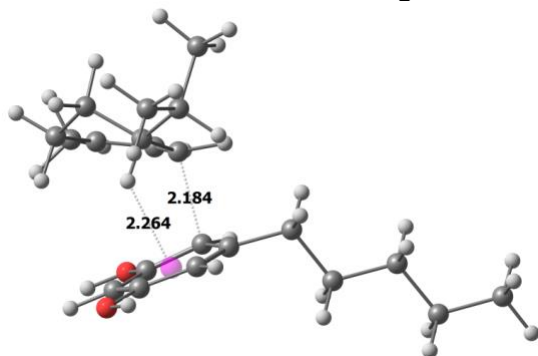

|   |          |           |           |
|---|----------|-----------|-----------|
| C | 0.910711 | 1.216407  | -0.653567 |
| C | 1.565192 | 2.317770  | -0.039442 |
| C | 2.881834 | 2.267416  | 0.304679  |
| C | 3.560261 | 3.385447  | 1.006274  |
| H | 2.871074 | 4.187860  | 1.278111  |
| H | 4.054840 | 3.007048  | 1.911029  |
| H | 4.361659 | 3.791188  | 0.374187  |
| C | 3.691854 | 1.059795  | -0.047822 |
| C | 3.177080 | 0.404581  | -1.330006 |
| H | 3.755519 | -0.498182 | -1.548492 |
| H | 3.325654 | 1.104425  | -2.161332 |
| C | 1.687738 | 0.051276  | -1.203124 |
| H | 1.631840 | -0.769944 | -0.469456 |
| H | 4.748675 | 1.335134  | -0.140014 |
| H | 3.632273 | 0.346250  | 0.791658  |

|   |           |           |           |
|---|-----------|-----------|-----------|
| H | 0.975004  | 3.195872  | 0.212789  |
| H | -0.033330 | 1.439364  | -1.145245 |
| C | 0.516816  | -2.181813 | 1.302164  |
| C | 1.148330  | -1.186745 | 2.052750  |
| C | 0.698075  | 0.115111  | 1.927382  |
| C | -0.315463 | 0.456285  | 0.986380  |
| C | -1.016365 | -0.594434 | 0.323997  |
| C | -0.565706 | -1.889528 | 0.445956  |
| H | -1.055413 | -2.698954 | -0.091442 |
| H | -0.802550 | 1.421217  | 1.098326  |
| O | 1.209727  | 1.137081  | 2.631658  |
| H | 1.931261  | 0.831350  | 3.203007  |
| H | 1.955912  | -1.447216 | 2.731144  |
| O | 0.981520  | -3.433306 | 1.451122  |
| H | 0.469139  | -4.051833 | 0.908942  |
| C | -2.246447 | -0.270030 | -0.468392 |
| H | -2.405566 | -1.033282 | -1.239092 |
| H | -2.123857 | 0.695156  | -0.977561 |
| C | -3.488811 | -0.194717 | 0.438724  |
| H | -3.628659 | -1.166570 | 0.930968  |
| H | -3.313244 | 0.541125  | 1.235518  |
| C | -4.747610 | 0.179767  | -0.340329 |
| H | -4.904509 | -0.547160 | -1.150542 |
| H | -4.598840 | 1.156431  | -0.823475 |
| C | -5.995105 | 0.233967  | 0.540739  |
| H | -6.142397 | -0.744642 | 1.017930  |
| H | -5.831538 | 0.953792  | 1.354655  |
| C | -7.248809 | 0.618730  | -0.242769 |
| H | -7.445850 | -0.103095 | -1.043775 |
| H | -8.130973 | 0.651548  | 0.404985  |
| H | -7.133332 | 1.606053  | -0.704646 |
| C | 1.035574  | -0.486382 | -2.498635 |
| H | -0.031027 | -0.619967 | -2.264778 |
| C | 1.597565  | -1.856920 | -2.877497 |
| C | 1.138692  | 0.492784  | -3.671217 |
| H | 0.794757  | 1.497537  | -3.398339 |
| H | 2.169827  | 0.575035  | -4.031626 |
| H | 0.524092  | 0.143824  | -4.507455 |
| H | 2.652530  | -1.789845 | -3.166208 |
| H | 1.048221  | -2.271457 | -3.729314 |
| H | 1.515392  | -2.562870 | -2.042274 |



**Table S98.** Coordinates for global minimum of **6**.

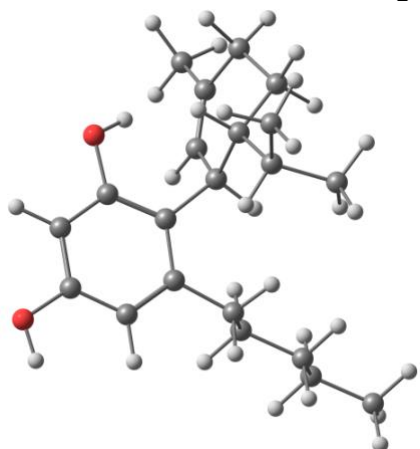

|   |           |           |           |
|---|-----------|-----------|-----------|
| C | -0.636150 | -0.595617 | 0.147177  |
| C | -0.992265 | -1.124009 | 1.523386  |
| C | -2.023761 | -1.935352 | 1.798459  |
| C | -2.351366 | -2.366367 | 3.196968  |
| H | -2.266852 | -3.456481 | 3.293403  |
| H | -3.390638 | -2.111407 | 3.443167  |
| H | -1.692995 | -1.896911 | 3.933280  |
| C | -2.913525 | -2.463477 | 0.704027  |
| C | -2.262388 | -2.334448 | -0.670067 |
| H | -2.978848 | -2.610015 | -1.453067 |
| H | -1.427563 | -3.045854 | -0.732347 |
| C | -1.736367 | -0.914406 | -0.899298 |
| H | -2.571881 | -0.220713 | -0.717012 |
| C | -1.254119 | -0.663419 | -2.344665 |
| C | -2.435446 | -0.427801 | -3.290917 |
| H | -3.042075 | 0.423154  | -2.961014 |
| H | -2.083171 | -0.220159 | -4.307698 |
| H | -3.086650 | -1.308762 | -3.341351 |
| C | -0.359328 | -1.783162 | -2.887958 |
| H | 0.112468  | -1.470037 | -3.825840 |
| H | 0.438319  | -2.058355 | -2.188831 |
| H | -0.944277 | -2.686525 | -3.096393 |
| H | -0.666050 | 0.266191  | -2.324084 |
| H | -3.155531 | -3.513456 | 0.919302  |
| H | -3.874962 | -1.925778 | 0.729122  |
| H | -0.356751 | -0.780053 | 2.341612  |
| H | 0.278167  | -1.117169 | -0.164329 |
| C | -0.324149 | 0.894161  | 0.211436  |
| C | -1.260405 | 1.782143  | 0.781171  |
| C | -1.056924 | 3.159407  | 0.808987  |
| C | 0.112876  | 3.678295  | 0.271253  |
| C | 1.074539  | 2.829661  | -0.271585 |
| C | 0.863942  | 1.447981  | -0.301923 |

|   |           |           |           |
|---|-----------|-----------|-----------|
| C | 1.970181  | 0.582887  | -0.857405 |
| H | 2.625133  | 1.200247  | -1.483915 |
| H | 1.564257  | -0.195314 | -1.513557 |
| C | 2.817750  | -0.075834 | 0.242281  |
| C | 3.866886  | -1.029435 | -0.324474 |
| C | 4.719305  | -1.694939 | 0.755134  |
| C | 5.753292  | -2.659584 | 0.177320  |
| H | 5.266147  | -3.460088 | -0.391675 |
| H | 6.437679  | -2.138227 | -0.502134 |
| H | 6.353435  | -3.125452 | 0.966102  |
| H | 4.061041  | -2.231337 | 1.452780  |
| H | 5.226171  | -0.918505 | 1.344835  |
| H | 4.520907  | -0.483784 | -1.020797 |
| H | 3.362782  | -1.805977 | -0.919577 |
| H | 2.164030  | -0.621736 | 0.936858  |
| H | 3.305517  | 0.710999  | 0.834630  |
| H | 1.994975  | 3.244422  | -0.677920 |
| O | 0.273860  | 5.037588  | 0.311625  |
| H | 1.123693  | 5.267865  | -0.086628 |
| H | -1.802874 | 3.810101  | 1.254572  |
| O | -2.437296 | 1.349742  | 1.330860  |
| H | -2.368460 | 0.390905  | 1.507841  |

**Table S99.** Coordinates for global minimum of **3f<sup>‡</sup>**.

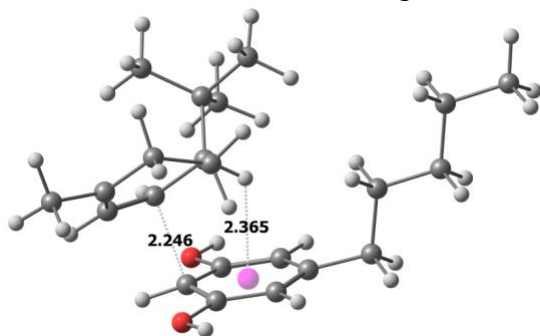

|   |           |           |           |
|---|-----------|-----------|-----------|
| C | -1.947724 | -0.119075 | 0.587775  |
| C | -3.153024 | -0.219966 | -0.151460 |
| C | -3.275768 | -1.025340 | -1.245530 |
| C | -4.591203 | -1.240296 | -1.902642 |
| H | -4.807735 | -2.313575 | -1.977493 |
| H | -5.407168 | -0.737934 | -1.379185 |
| H | -4.544405 | -0.868362 | -2.935358 |
| C | -2.109808 | -1.782220 | -1.782368 |
| C | -0.772508 | -1.226736 | -1.307547 |
| H | -0.579293 | -0.302041 | -1.863224 |
| H | 0.038671  | -1.909705 | -1.568103 |
| C | -0.723352 | -0.871602 | 0.188036  |
| H | 0.145038  | -0.209470 | 0.320964  |
| H | -2.246283 | -2.838325 | -1.502622 |

|   |           |           |           |
|---|-----------|-----------|-----------|
| H | -2.155971 | -1.776286 | -2.879638 |
| H | -4.033391 | 0.290467  | 0.232846  |
| H | -2.067598 | 0.096607  | 1.646361  |
| C | -1.081275 | 2.169945  | -0.852103 |
| C | -1.536229 | 2.086960  | 0.486222  |
| C | -0.572005 | 2.168277  | 1.523782  |
| C | 0.779426  | 2.134815  | 1.237865  |
| C | 1.204813  | 2.097053  | -0.100519 |
| C | 0.275575  | 2.138030  | -1.144130 |
| H | 0.612115  | 2.139168  | -2.178250 |
| H | 1.511652  | 2.130418  | 2.041874  |
| O | -1.072405 | 2.206507  | 2.776689  |
| H | -0.351460 | 2.190806  | 3.423889  |
| H | -2.573067 | 2.314309  | 0.711772  |
| O | -2.042447 | 2.221473  | -1.792182 |
| H | -1.645612 | 2.212468  | -2.676440 |
| C | 2.662577  | 1.915961  | -0.400040 |
| H | 3.266800  | 2.469863  | 0.328719  |
| H | 2.894732  | 2.301965  | -1.399154 |
| C | 3.032452  | 0.420796  | -0.329515 |
| H | 2.771953  | 0.037920  | 0.667211  |
| H | 2.411385  | -0.131962 | -1.049066 |
| C | 4.508704  | 0.155562  | -0.609280 |
| H | 5.123041  | 0.719322  | 0.107587  |
| H | 4.767777  | 0.533673  | -1.608642 |
| C | 4.857769  | -1.330275 | -0.519759 |
| H | 4.585406  | -1.703688 | 0.477371  |
| H | 4.240972  | -1.888837 | -1.237665 |
| C | 6.336522  | -1.605358 | -0.786007 |
| H | 6.562935  | -2.674513 | -0.718294 |
| H | 6.624483  | -1.263242 | -1.786677 |
| H | 6.968236  | -1.081146 | -0.059637 |
| C | -0.443288 | -2.040906 | 1.218994  |
| C | 0.054777  | -1.418772 | 2.533617  |
| C | 0.671630  | -2.939550 | 0.668790  |
| H | 0.334077  | -3.536709 | -0.184138 |
| H | 1.543188  | -2.350367 | 0.358510  |
| H | 0.993359  | -3.633989 | 1.452807  |
| H | -0.684018 | -0.751524 | 2.990939  |
| H | 0.976073  | -0.847407 | 2.369307  |
| H | 0.270198  | -2.211066 | 3.258918  |
| C | -1.686197 | -2.893866 | 1.507229  |
| H | -2.082023 | -3.358813 | 0.599556  |
| H | -1.422615 | -3.697982 | 2.203484  |
| H | -2.486169 | -2.305148 | 1.969139  |

**Table S100.** Coordinates for global minimum of **3f**.

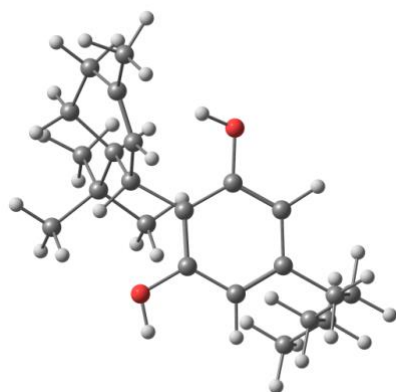

|   |           |           |           |
|---|-----------|-----------|-----------|
| C | -1.839475 | -0.146270 | -0.666933 |
| C | -2.857000 | -1.257825 | -0.464421 |
| C | -3.954148 | -1.190352 | 0.299540  |
| C | -4.861296 | -2.365143 | 0.513962  |
| H | -4.970888 | -2.573345 | 1.586497  |
| H | -4.485379 | -3.266049 | 0.020879  |
| H | -5.867765 | -2.148935 | 0.133159  |
| C | -4.335204 | 0.098578  | 0.970042  |
| C | -3.611829 | 1.292006  | 0.353529  |
| H | -3.844561 | 2.184438  | 0.938985  |
| H | -4.002898 | 1.458287  | -0.659857 |
| C | -2.092060 | 1.065047  | 0.284451  |
| H | -1.762518 | 0.775549  | 1.295122  |
| C | -1.300886 | 2.373291  | -0.051150 |
| C | -1.600314 | 2.887538  | -1.466146 |
| H | -2.670126 | 3.075155  | -1.609729 |
| H | -1.072004 | 3.833461  | -1.636092 |
| H | -1.266061 | 2.180169  | -2.231775 |
| C | -1.687838 | 3.472205  | 0.960201  |
| H | -1.607450 | 3.106450  | 1.991584  |
| H | -1.008700 | 4.324826  | 0.850976  |
| H | -2.704036 | 3.845425  | 0.805712  |
| C | 0.217635  | 2.165183  | 0.092023  |
| H | 0.465305  | 1.703882  | 1.056101  |
| H | 0.726070  | 3.135343  | 0.039889  |
| H | 0.628073  | 1.535298  | -0.698268 |
| H | -5.423331 | 0.232382  | 0.893370  |
| H | -4.119129 | 0.031442  | 2.048538  |
| H | -2.618324 | -2.196631 | -0.966915 |
| H | -1.949985 | 0.211832  | -1.697618 |
| C | -0.457284 | -0.768720 | -0.556098 |
| C | 0.457984  | -0.732996 | -1.614867 |
| C | 1.753476  | -1.235267 | -1.491467 |
| C | 2.170669  | -1.810770 | -0.292454 |
| C | 1.258253  | -1.923672 | 0.754699  |

|   |           |           |           |
|---|-----------|-----------|-----------|
| C | -0.036701 | -1.428853 | 0.610858  |
| O | -0.877111 | -1.599014 | 1.679132  |
| H | -1.797478 | -1.492822 | 1.372826  |
| H | 1.536579  | -2.402533 | 1.689982  |
| C | 3.597306  | -2.262651 | -0.109610 |
| H | 4.085811  | -2.333388 | -1.089324 |
| H | 3.612297  | -3.265263 | 0.336210  |
| C | 4.401123  | -1.305121 | 0.789161  |
| C | 4.474149  | 0.119840  | 0.245185  |
| C | 5.309344  | 1.053814  | 1.119748  |
| C | 5.348545  | 2.482350  | 0.579221  |
| H | 5.946490  | 3.139392  | 1.219574  |
| H | 4.337561  | 2.902339  | 0.516112  |
| H | 5.782167  | 2.507513  | -0.427318 |
| H | 4.897844  | 1.055788  | 2.138717  |
| H | 6.332106  | 0.659844  | 1.199923  |
| H | 4.891552  | 0.100371  | -0.773063 |
| H | 3.457501  | 0.528158  | 0.151466  |
| H | 3.950460  | -1.289622 | 1.791308  |
| H | 5.417678  | -1.705233 | 0.906558  |
| H | 2.444552  | -1.151812 | -2.328318 |
| O | 0.048647  | -0.135680 | -2.780198 |
| H | 0.782977  | -0.140164 | -3.408370 |

**Table S101.** Coordinates for global minimum of **6f<sup>‡</sup>**.

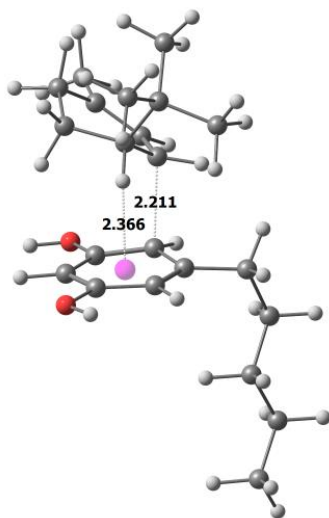

|   |           |           |           |
|---|-----------|-----------|-----------|
| C | -1.270116 | -0.079656 | -0.888452 |
| C | -1.861875 | -1.275227 | -1.374134 |
| C | -3.016206 | -1.783805 | -0.862456 |
| C | -3.683352 | -2.962322 | -1.476940 |
| H | -3.170402 | -3.306679 | -2.377330 |
| H | -3.717136 | -3.783026 | -0.747547 |
| H | -4.727929 | -2.726827 | -1.717644 |

|   |           |           |           |
|---|-----------|-----------|-----------|
| C | -3.703571 | -1.131191 | 0.285682  |
| C | -2.812986 | -0.172631 | 1.074250  |
| H | -2.175089 | -0.774710 | 1.730161  |
| H | -3.427943 | 0.441445  | 1.736425  |
| C | -1.884870 | 0.712536  | 0.220183  |
| H | -1.064761 | 1.047869  | 0.875123  |
| H | -4.597675 | -0.633785 | -0.118498 |
| H | -4.096852 | -1.909344 | 0.953660  |
| H | -1.405835 | -1.756856 | -2.236571 |
| H | -0.699632 | 0.477953  | -1.622812 |
| C | 1.028772  | 0.328610  | 2.286096  |
| C | 0.449359  | -0.936044 | 2.184284  |
| C | 0.332612  | -1.505556 | 0.927020  |
| C | 0.719262  | -0.793254 | -0.240143 |
| C | 1.421208  | 0.438355  | -0.094253 |
| C | 1.521694  | 1.012555  | 1.151999  |
| H | 2.014194  | 1.973899  | 1.280166  |
| H | 0.829424  | -1.356042 | -1.162347 |
| O | -0.186193 | -2.728075 | 0.724947  |
| H | -0.476029 | -3.115938 | 1.564825  |
| H | 0.115351  | -1.455822 | 3.077810  |
| O | 1.119117  | 0.853878  | 3.519784  |
| H | 1.545337  | 1.723357  | 3.486140  |
| C | 2.035336  | 1.081059  | -1.302756 |
| H | 2.306492  | 2.115969  | -1.065718 |
| H | 1.301050  | 1.113573  | -2.119129 |
| C | 3.283448  | 0.323717  | -1.798937 |
| H | 2.998401  | -0.691562 | -2.106236 |
| H | 3.648288  | 0.833233  | -2.700176 |
| C | 4.402110  | 0.250269  | -0.762811 |
| H | 4.052183  | -0.302599 | 0.120692  |
| H | 4.644927  | 1.265667  | -0.415074 |
| C | 5.665817  | -0.417280 | -1.304519 |
| H | 5.414745  | -1.424986 | -1.663675 |
| H | 6.023471  | 0.142826  | -2.179400 |
| C | 6.776335  | -0.505341 | -0.259265 |
| H | 6.447490  | -1.083311 | 0.612217  |
| H | 7.671223  | -0.988582 | -0.664863 |
| H | 7.063016  | 0.492802  | 0.091715  |
| C | -2.490936 | 2.074682  | -0.300016 |
| C | -2.880447 | 2.926851  | 0.916981  |
| C | -3.721523 | 1.863516  | -1.189153 |
| H | -3.510591 | 1.176934  | -2.017371 |
| H | -4.567039 | 1.470774  | -0.616439 |
| H | -4.033151 | 2.822138  | -1.619558 |
| H | -3.680511 | 2.469873  | 1.505865  |
| H | -3.240548 | 3.903967  | 0.576800  |

|   |           |          |           |
|---|-----------|----------|-----------|
| H | -2.016274 | 3.091676 | 1.571736  |
| C | -1.423718 | 2.853614 | -1.087925 |
| H | -1.771688 | 3.878220 | -1.256109 |
| H | -0.479255 | 2.904797 | -0.531769 |
| H | -1.224380 | 2.417375 | -2.071863 |

**Table S102.** Coordinates for global minimum of **6f**.

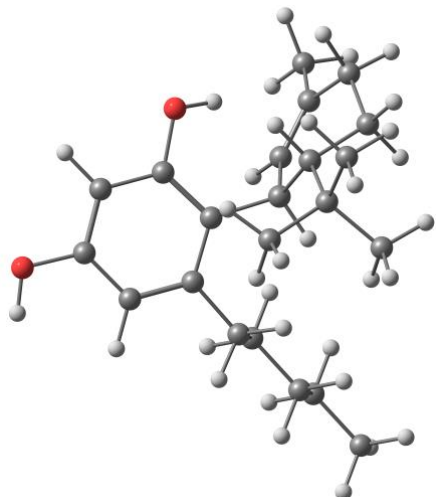

|   |           |           |           |
|---|-----------|-----------|-----------|
| C | -0.570355 | -0.587497 | 0.151301  |
| C | -0.568066 | -1.127077 | 1.574873  |
| C | -1.509570 | -1.901580 | 2.129392  |
| C | -1.478485 | -2.298595 | 3.575091  |
| H | -0.639595 | -1.840264 | 4.106332  |
| H | -1.404478 | -3.389295 | 3.673521  |
| H | -2.411320 | -2.002979 | 4.073216  |
| C | -2.645336 | -2.428804 | 1.298876  |
| C | -2.328143 | -2.337968 | -0.188950 |
| H | -3.199014 | -2.662205 | -0.764749 |
| H | -1.514173 | -3.040400 | -0.415177 |
| C | -1.899705 | -0.919079 | -0.599113 |
| H | -2.672169 | -0.224102 | -0.236875 |
| C | -1.881092 | -0.744035 | -2.153147 |
| C | -0.987159 | -1.786032 | -2.841330 |
| H | -0.953220 | -1.591121 | -3.919688 |
| H | 0.042780  | -1.752832 | -2.468142 |
| H | -1.367706 | -2.802804 | -2.699383 |
| C | -3.319082 | -0.903013 | -2.687162 |
| H | -3.337475 | -0.700019 | -3.763933 |
| H | -3.715816 | -1.911295 | -2.539698 |
| H | -3.995775 | -0.191248 | -2.198580 |
| C | -1.416408 | 0.660955  | -2.567179 |
| H | -1.968067 | 1.438692  | -2.025700 |
| H | -1.593327 | 0.800028  | -3.640346 |
| H | -0.352444 | 0.815705  | -2.382465 |

|   |           |           |           |
|---|-----------|-----------|-----------|
| H | -2.842742 | -3.471385 | 1.584866  |
| H | -3.568833 | -1.875766 | 1.535748  |
| H | 0.261003  | -0.781182 | 2.194201  |
| H | 0.241766  | -1.092599 | -0.385749 |
| C | -0.216924 | 0.894811  | 0.238464  |
| C | -1.058932 | 1.776433  | 0.944222  |
| C | -0.822848 | 3.147350  | 1.000567  |
| C | 0.307375  | 3.660421  | 0.379408  |
| C | 1.206337  | 2.807339  | -0.257122 |
| C | 0.957464  | 1.433808  | -0.320436 |
| C | 2.007122  | 0.564326  | -0.972408 |
| H | 2.645902  | 1.191959  | -1.605523 |
| H | 1.549191  | -0.176963 | -1.638820 |
| C | 2.887747  | -0.161440 | 0.055551  |
| C | 3.931963  | -1.065015 | -0.596203 |
| C | 4.804356  | -1.797176 | 0.422794  |
| C | 5.844852  | -2.703096 | -0.233169 |
| H | 6.456237  | -3.219299 | 0.514565  |
| H | 5.362664  | -3.464738 | -0.857037 |
| H | 6.518081  | -2.124133 | -0.876019 |
| H | 4.160366  | -2.392328 | 1.085152  |
| H | 5.307374  | -1.059346 | 1.063242  |
| H | 4.571602  | -0.466175 | -1.261296 |
| H | 3.424221  | -1.802024 | -1.236430 |
| H | 2.255100  | -0.760591 | 0.724377  |
| H | 3.384164  | 0.586685  | 0.689466  |
| H | 2.108956  | 3.213495  | -0.709563 |
| O | 0.502796  | 5.014096  | 0.446410  |
| H | 1.323683  | 5.238982  | -0.011260 |
| H | -1.505213 | 3.794855  | 1.542245  |
| O | -2.173039 | 1.341428  | 1.614814  |
| H | -2.064727 | 0.391582  | 1.807815  |



**Table S103.** Coordinates for global minimum of **3bc<sup>‡</sup>**.

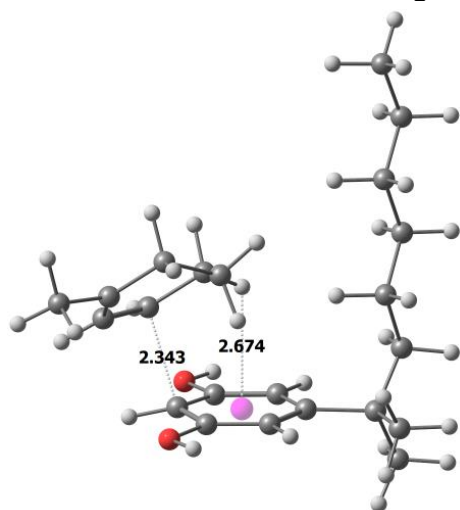

|   |           |           |           |
|---|-----------|-----------|-----------|
| C | 2.027156  | 1.114709  | 1.224518  |
| C | 3.169945  | 1.630040  | 0.587801  |
| C | 3.069246  | 2.477265  | -0.484814 |
| C | 4.268490  | 3.120832  | -1.072315 |
| H | 5.181608  | 2.893627  | -0.518924 |
| H | 4.382047  | 2.780568  | -2.111410 |
| H | 4.127441  | 4.207884  | -1.128412 |
| C | 1.740047  | 2.855237  | -1.048049 |
| C | 0.644448  | 1.840997  | -0.735317 |
| H | 0.796894  | 0.944051  | -1.345506 |
| H | -0.334698 | 2.248989  | -1.003235 |
| C | 0.667339  | 1.454706  | 0.740473  |
| H | -0.032645 | 0.642282  | 0.970110  |
| H | 1.491509  | 3.841535  | -0.618693 |
| H | 1.833870  | 3.023773  | -2.127597 |
| H | 4.149288  | 1.408392  | 1.004415  |
| H | 2.121143  | 0.805627  | 2.262721  |
| C | 2.161691  | -1.269753 | -0.483442 |
| C | 2.348903  | -1.184949 | 0.910836  |
| C | 1.313164  | -1.669451 | 1.740826  |
| C | 0.115826  | -2.110640 | 1.208122  |
| C | -0.070708 | -2.148969 | -0.187448 |
| C | 0.960248  | -1.718100 | -1.025244 |
| H | 0.853778  | -1.743725 | -2.104331 |
| H | -0.664569 | -2.452628 | 1.881833  |
| O | 1.565301  | -1.627911 | 3.070679  |
| H | 0.794744  | -1.944272 | 3.564395  |
| H | 3.344635  | -1.043420 | 1.317093  |
| O | 3.200097  | -0.866356 | -1.243460 |
| H | 2.968430  | -0.928922 | -2.182340 |
| H | 0.336841  | 2.302708  | 1.368414  |
| C | -1.383831 | -2.699102 | -0.743450 |

|   |           |           |           |
|---|-----------|-----------|-----------|
| C | -2.577040 | -1.888504 | -0.177341 |
| H | -3.499899 | -2.387395 | -0.504693 |
| H | -2.565397 | -1.955678 | 0.918475  |
| C | -2.618074 | -0.417637 | -0.588082 |
| H | -2.840776 | -0.330584 | -1.659486 |
| H | -1.625726 | 0.031672  | -0.443635 |
| C | -3.648742 | 0.385801  | 0.204225  |
| H | -4.648938 | -0.042753 | 0.042826  |
| H | -3.438149 | 0.284355  | 1.279196  |
| C | -3.662329 | 1.867338  | -0.167771 |
| H | -2.665021 | 2.294442  | 0.018918  |
| H | -3.845357 | 1.972405  | -1.247438 |
| C | -1.428304 | -2.680698 | -2.276007 |
| H | -0.668071 | -3.343110 | -2.704156 |
| H | -2.408685 | -3.038184 | -2.607835 |
| H | -1.282108 | -1.677226 | -2.686596 |
| C | -1.524634 | -4.165064 | -0.280130 |
| H | -1.585011 | -4.243218 | 0.809584  |
| H | -2.439738 | -4.594211 | -0.702935 |
| H | -0.672782 | -4.762901 | -0.622047 |
| C | -4.705542 | 2.676517  | 0.601911  |
| H | -4.527996 | 2.561151  | 1.680221  |
| H | -5.702468 | 2.257728  | 0.406484  |
| C | -4.689198 | 4.159123  | 0.233981  |
| H | -5.444859 | 4.720699  | 0.793248  |
| H | -3.711074 | 4.604658  | 0.450351  |
| H | -4.889492 | 4.298829  | -0.834733 |

**Table S104.** Coordinates for global minimum of **3bc**.

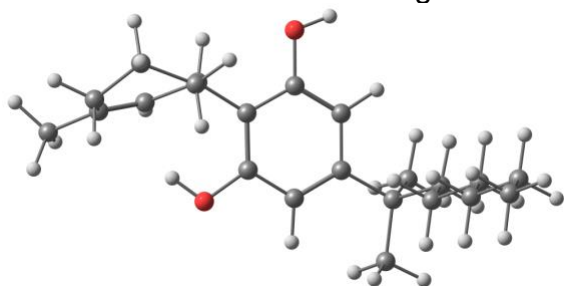

|   |          |           |           |
|---|----------|-----------|-----------|
| C | 2.884768 | 0.474954  | 0.842381  |
| C | 4.098639 | -0.111736 | 0.153585  |
| C | 5.024137 | 0.603015  | -0.503658 |
| C | 6.189539 | -0.043599 | -1.191228 |
| H | 6.224113 | 0.254644  | -2.247388 |
| H | 6.140617 | -1.134824 | -1.137467 |
| H | 7.134204 | 0.288746  | -0.741857 |
| C | 4.949833 | 2.106425  | -0.589677 |
| C | 3.998585 | 2.706310  | 0.445374  |
| C | 2.672900 | 1.950203  | 0.449967  |

|   |           |           |           |
|---|-----------|-----------|-----------|
| H | 2.222199  | 1.997613  | -0.551675 |
| H | 1.957700  | 2.405960  | 1.144490  |
| H | 4.457152  | 2.639747  | 1.441817  |
| H | 3.834113  | 3.769676  | 0.236068  |
| H | 4.635080  | 2.388436  | -1.606970 |
| H | 5.961777  | 2.516741  | -0.468523 |
| H | 4.214464  | -1.195292 | 0.220230  |
| H | 3.073669  | 0.436041  | 1.923552  |
| C | 1.630401  | -0.335857 | 0.583078  |
| C | 1.273067  | -0.778427 | -0.697733 |
| C | 0.086764  | -1.477226 | -0.939810 |
| C | -0.799008 | -1.751630 | 0.097935  |
| C | -0.463849 | -1.315861 | 1.385103  |
| C | 0.720800  | -0.621275 | 1.612065  |
| O | 1.044325  | -0.171879 | 2.867703  |
| H | 0.343163  | -0.425779 | 3.482177  |
| H | -1.127395 | -1.503317 | 2.225704  |
| C | -2.116978 | -2.497799 | -0.123152 |
| C | -2.128565 | -3.771105 | 0.746281  |
| H | -3.061094 | -4.325040 | 0.585949  |
| H | -1.289592 | -4.425061 | 0.482941  |
| H | -2.055122 | -3.532945 | 1.811961  |
| C | -2.307481 | -2.929984 | -1.582776 |
| H | -2.300043 | -2.084306 | -2.276480 |
| H | -1.524502 | -3.631095 | -1.892162 |
| H | -3.272676 | -3.438519 | -1.682942 |
| C | -3.302880 | -1.600093 | 0.312225  |
| C | -3.407064 | -0.254116 | -0.402819 |
| C | -4.551673 | 0.606046  | 0.133024  |
| C | -4.666433 | 1.956256  | -0.573138 |
| C | -5.811007 | 2.820163  | -0.044200 |
| C | -5.911251 | 4.168327  | -0.756233 |
| H | -4.986120 | 4.743756  | -0.634443 |
| H | -6.078458 | 4.031337  | -1.831012 |
| H | -6.736254 | 4.771234  | -0.362057 |
| H | -5.672684 | 2.981492  | 1.034038  |
| H | -6.757233 | 2.272385  | -0.155399 |
| H | -3.718570 | 2.504139  | -0.464791 |
| H | -4.805659 | 1.792090  | -1.652044 |
| H | -4.408378 | 0.770845  | 1.211289  |
| H | -5.500317 | 0.058864  | 0.027484  |
| H | -2.459374 | 0.291510  | -0.290714 |
| H | -3.552169 | -0.408471 | -1.480435 |
| H | -4.230440 | -2.170302 | 0.155744  |
| H | -3.231228 | -1.420993 | 1.393935  |
| H | -0.114045 | -1.785932 | -1.959163 |
| O | 2.056218  | -0.530309 | -1.792692 |

H 2.930293 -0.208516 -1.494590

**Table S105.** Coordinates for global minimum of **6bc<sup>‡</sup>**.

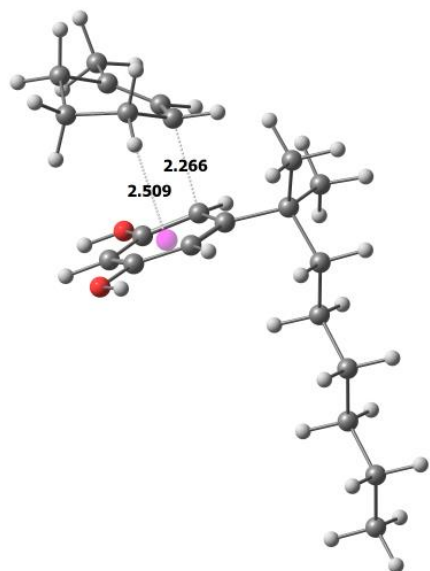

|   |           |           |           |
|---|-----------|-----------|-----------|
| C | -2.625094 | -0.990955 | 0.149923  |
| C | -3.340478 | -0.666719 | 1.327237  |
| C | -4.541331 | -0.019590 | 1.279036  |
| C | -5.359481 | 0.183587  | 2.502164  |
| H | -5.478764 | 1.261103  | 2.680963  |
| H | -6.372845 | -0.210951 | 2.352828  |
| H | -4.913199 | -0.278109 | 3.385259  |
| C | -5.130101 | 0.423375  | -0.021155 |
| C | -4.084077 | 0.617253  | -1.113831 |
| H | -3.512653 | 1.527459  | -0.904129 |
| H | -4.570510 | 0.762319  | -2.083265 |
| C | -3.133602 | -0.575697 | -1.182276 |
| H | -2.298736 | -0.397139 | -1.873620 |
| H | -5.862988 | -0.347493 | -0.314769 |
| H | -5.715081 | 1.338047  | 0.133687  |
| H | -2.964879 | -1.029611 | 2.281115  |
| H | -2.030570 | -1.897460 | 0.178044  |
| C | -0.226827 | 1.388221  | -1.882063 |
| C | -0.916149 | 2.041318  | -0.860859 |
| C | -1.089787 | 1.370046  | 0.336323  |
| C | -0.635756 | 0.034213  | 0.505939  |
| C | 0.169814  | -0.562882 | -0.501023 |
| C | 0.315154  | 0.100697  | -1.704122 |
| H | 0.886159  | -0.335909 | -2.519010 |
| H | -0.615866 | -0.352242 | 1.517978  |
| O | -1.716553 | 1.912141  | 1.396438  |
| H | -2.040931 | 2.800211  | 1.182390  |
| H | -1.287673 | 3.051339  | -1.009503 |

|   |           |           |           |
|---|-----------|-----------|-----------|
| O | -0.083340 | 2.062754  | -3.038854 |
| H | 0.425404  | 1.540112  | -3.676560 |
| H | -3.651725 | -1.461658 | -1.590134 |
| C | 0.864170  | -1.909026 | -0.286509 |
| C | 2.386803  | -1.728827 | -0.526334 |
| H | 2.856676  | -2.714128 | -0.397342 |
| H | 2.547586  | -1.447556 | -1.575394 |
| C | 3.084255  | -0.709561 | 0.373276  |
| H | 3.020940  | -1.023839 | 1.423247  |
| H | 2.568968  | 0.259679  | 0.304585  |
| C | 4.554885  | -0.522005 | -0.000534 |
| H | 5.069792  | -1.492769 | 0.050168  |
| H | 4.623620  | -0.189809 | -1.046901 |
| C | 5.277380  | 0.481197  | 0.897215  |
| H | 5.211372  | 0.147522  | 1.943335  |
| H | 4.759752  | 1.450859  | 0.849324  |
| C | 0.335028  | -2.928012 | -1.317554 |
| H | -0.744856 | -3.081149 | -1.215191 |
| H | 0.536669  | -2.603468 | -2.342894 |
| H | 0.829207  | -3.893297 | -1.162557 |
| C | 0.640170  | -2.479275 | 1.120634  |
| H | 0.987706  | -1.803105 | 1.906686  |
| H | -0.412903 | -2.712100 | 1.311900  |
| H | 1.202086  | -3.414206 | 1.213466  |
| C | 6.746480  | 0.675565  | 0.522793  |
| H | 7.261874  | -0.293775 | 0.570934  |
| H | 6.811361  | 1.008062  | -0.522629 |
| C | 7.457911  | 1.681038  | 1.426680  |
| H | 6.978285  | 2.665248  | 1.370432  |
| H | 8.508588  | 1.803059  | 1.143015  |
| H | 7.428060  | 1.355665  | 2.473050  |

**Table S106.** Coordinates for global minimum of **6bc**.

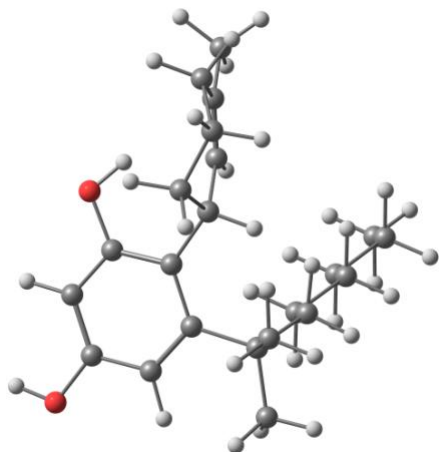

|   |          |          |           |
|---|----------|----------|-----------|
| C | 1.314543 | 0.979715 | -0.608200 |
|---|----------|----------|-----------|

|   |           |           |           |
|---|-----------|-----------|-----------|
| C | 0.591039  | 2.077071  | 0.147571  |
| C | 1.009888  | 3.349012  | 0.230468  |
| C | 0.261670  | 4.385489  | 1.014378  |
| H | 0.921281  | 4.854901  | 1.756100  |
| H | -0.087988 | 5.189737  | 0.354237  |
| H | -0.601159 | 3.959295  | 1.533964  |
| C | 2.267908  | 3.813831  | -0.458954 |
| C | 2.754523  | 2.831208  | -1.524165 |
| C | 2.748928  | 1.404169  | -0.981146 |
| H | 3.404467  | 1.345073  | -0.102669 |
| H | 3.148842  | 0.700588  | -1.720563 |
| H | 2.091408  | 2.887309  | -2.398983 |
| H | 3.758959  | 3.109776  | -1.863490 |
| H | 3.049006  | 3.972952  | 0.301783  |
| H | 2.082790  | 4.802409  | -0.901195 |
| H | -0.340739 | 1.789972  | 0.639234  |
| H | 0.775261  | 0.852359  | -1.546446 |
| C | 1.288838  | -0.348071 | 0.137387  |
| C | 1.805743  | -0.358240 | 1.449772  |
| C | 1.932518  | -1.522752 | 2.202809  |
| C | 1.515053  | -2.715853 | 1.638768  |
| C | 0.948947  | -2.737481 | 0.367099  |
| C | 0.814804  | -1.574189 | -0.398047 |
| C | 0.114935  | -1.688603 | -1.773451 |
| C | 1.080381  | -1.324572 | -2.922846 |
| H | 0.573897  | -1.471785 | -3.884204 |
| H | 1.433284  | -0.292461 | -2.892225 |
| H | 1.958475  | -1.979742 | -2.898327 |
| C | -0.342381 | -3.130847 | -2.072071 |
| H | -0.838383 | -3.140052 | -3.048120 |
| H | -1.052718 | -3.513502 | -1.333927 |
| H | 0.505618  | -3.821495 | -2.126580 |
| C | -1.154588 | -0.791177 | -1.834349 |
| C | -2.116680 | -0.932052 | -0.655397 |
| C | -3.313701 | 0.011832  | -0.768330 |
| C | -4.284010 | -0.109565 | 0.405128  |
| C | -5.474002 | 0.844515  | 0.306787  |
| C | -6.439488 | 0.708371  | 1.482909  |
| H | -7.283582 | 1.400360  | 1.392580  |
| H | -5.932132 | 0.918990  | 2.431630  |
| H | -6.843550 | -0.309075 | 1.540712  |
| H | -5.103938 | 1.877790  | 0.250125  |
| H | -6.010036 | 0.657165  | -0.634218 |
| H | -3.743168 | 0.080632  | 1.344255  |
| H | -4.653009 | -1.144157 | 0.466514  |
| H | -2.950351 | 1.048770  | -0.833484 |
| H | -3.851336 | -0.186152 | -1.707606 |

|   |           |           |           |
|---|-----------|-----------|-----------|
| H | -1.579612 | -0.721620 | 0.279885  |
| H | -2.479193 | -1.966256 | -0.579838 |
| H | -1.683645 | -1.040057 | -2.765774 |
| H | -0.882255 | 0.265588  | -1.926756 |
| H | 0.607851  | -3.696041 | 0.000739  |
| O | 1.610746  | -3.912419 | 2.299442  |
| H | 2.011441  | -3.767203 | 3.166792  |
| H | 2.342643  | -1.472503 | 3.208265  |
| O | 2.234683  | 0.782025  | 2.076058  |
| H | 1.876206  | 1.560690  | 1.606147  |

**Table S107.** Coordinates for global minimum of **3bd<sup>‡</sup>**.

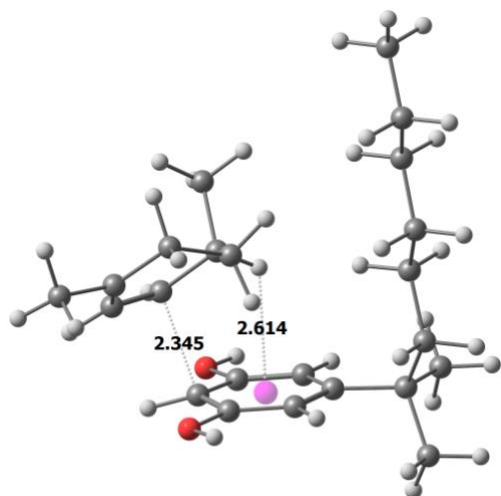

|   |           |           |           |
|---|-----------|-----------|-----------|
| C | -2.154796 | -1.034326 | 1.014382  |
| C | -3.025082 | -1.754381 | 0.178532  |
| C | -2.558551 | -2.674697 | -0.723992 |
| C | -3.489406 | -3.514527 | -1.515342 |
| H | -3.223938 | -4.574824 | -1.417150 |
| H | -4.533201 | -3.365683 | -1.232631 |
| H | -3.367213 | -3.272745 | -2.580675 |
| C | -1.098901 | -2.926091 | -0.888064 |
| C | -0.224946 | -1.780464 | -0.385803 |
| H | -0.264638 | -0.961506 | -1.111617 |
| H | 0.819607  | -2.103326 | -0.325930 |
| C | -0.683265 | -1.260572 | 0.979268  |
| H | -0.179093 | -0.310305 | 1.198626  |
| H | -0.883306 | -3.863960 | -0.349025 |
| H | -0.885409 | -3.151657 | -1.940241 |
| H | -4.097619 | -1.624377 | 0.300916  |
| H | -2.562326 | -0.634012 | 1.940303  |
| C | -1.989960 | 1.125417  | -0.963188 |
| C | -2.592264 | 1.160589  | 0.313553  |
| C | -1.919074 | 1.861566  | 1.335898  |
| C | -0.658131 | 2.403352  | 1.127868  |

|   |           |           |           |
|---|-----------|-----------|-----------|
| C | -0.056182 | 2.321414  | -0.135957 |
| C | -0.733272 | 1.670819  | -1.177134 |
| H | -0.294742 | 1.608080  | -2.168687 |
| H | -0.162942 | 2.908310  | 1.950168  |
| O | -2.565770 | 1.930232  | 2.522202  |
| H | -2.022835 | 2.400145  | 3.172341  |
| H | -3.646093 | 0.928304  | 0.424066  |
| O | -2.701739 | 0.507781  | -1.930612 |
| H | -2.199286 | 0.498340  | -2.759119 |
| C | 1.300420  | 2.964177  | -0.425657 |
| C | 2.282700  | 1.901862  | -0.978955 |
| H | 1.849748  | 1.449352  | -1.880979 |
| H | 3.189349  | 2.429368  | -1.306753 |
| C | 2.665929  | 0.793695  | 0.000890  |
| H | 1.763456  | 0.412122  | 0.499580  |
| H | 3.307475  | 1.197659  | 0.794815  |
| C | 3.381942  | -0.370400 | -0.681726 |
| H | 2.721087  | -0.795029 | -1.452363 |
| H | 4.271152  | 0.003362  | -1.210332 |
| C | 3.794613  | -1.471034 | 0.293611  |
| H | 4.507211  | -1.063152 | 1.025465  |
| H | 2.914547  | -1.792897 | 0.871581  |
| C | 1.092648  | 4.047427  | -1.506258 |
| H | 0.358038  | 4.789202  | -1.174595 |
| H | 2.041836  | 4.561218  | -1.694240 |
| H | 0.746347  | 3.616265  | -2.450398 |
| C | 1.910468  | 3.637744  | 0.809316  |
| H | 1.294489  | 4.476841  | 1.150630  |
| H | 2.040698  | 2.942631  | 1.644113  |
| H | 2.897400  | 4.033308  | 0.546984  |
| C | 4.411985  | -2.687718 | -0.394056 |
| H | 5.293013  | -2.369872 | -0.968750 |
| H | 3.695046  | -3.088373 | -1.124793 |
| C | 4.807255  | -3.785597 | 0.591712  |
| H | 5.242621  | -4.649279 | 0.078236  |
| H | 5.545042  | -3.417004 | 1.313839  |
| H | 3.934876  | -4.134951 | 1.156743  |
| C | -0.339523 | -2.229509 | 2.135225  |
| H | -0.652132 | -1.817404 | 3.099219  |
| H | -0.827591 | -3.200028 | 2.000765  |
| H | 0.743882  | -2.383650 | 2.156882  |



**Table S108.** Coordinates for global minimum of **3bd**.

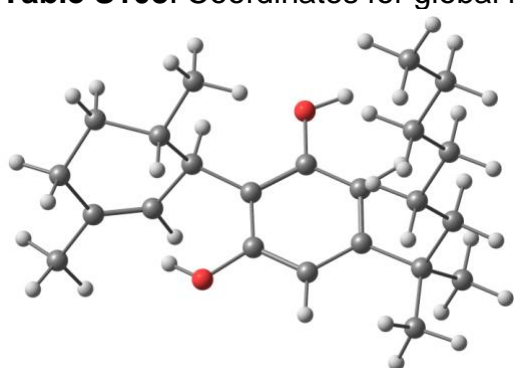

|   |           |           |           |
|---|-----------|-----------|-----------|
| C | -2.787435 | -0.431827 | 0.736856  |
| C | -4.011351 | 0.273520  | 0.189425  |
| C | -4.988057 | -0.317709 | -0.513223 |
| C | -6.156943 | 0.448189  | -1.057403 |
| H | -6.069480 | 1.520423  | -0.860908 |
| H | -6.243691 | 0.296094  | -2.141338 |
| H | -7.093836 | 0.084948  | -0.615735 |
| C | -4.967335 | -1.797193 | -0.795356 |
| C | -3.985813 | -2.545876 | 0.102765  |
| C | -2.623757 | -1.851150 | 0.141064  |
| H | -2.270469 | -1.744010 | -0.896816 |
| C | -1.597222 | -2.668996 | 0.919760  |
| H | -1.454140 | -3.651221 | 0.455928  |
| H | -0.625794 | -2.164476 | 0.954743  |
| H | -1.934341 | -2.826123 | 1.951809  |
| H | -4.387118 | -2.594025 | 1.125852  |
| H | -3.868450 | -3.579963 | -0.244677 |
| H | -4.713095 | -1.953414 | -1.855771 |
| H | -5.984152 | -2.195463 | -0.673824 |
| H | -4.081178 | 1.342888  | 0.397205  |
| H | -2.928599 | -0.546249 | 1.820851  |
| C | -1.534869 | 0.399433  | 0.534453  |
| C | -0.621299 | 0.629290  | 1.573811  |
| C | 0.565095  | 1.330255  | 1.377241  |
| C | 0.894608  | 1.836908  | 0.115151  |
| C | -0.006422 | 1.639483  | -0.926757 |
| C | -1.196403 | 0.938075  | -0.714259 |
| O | -2.007511 | 0.788307  | -1.807495 |
| H | -2.888274 | 0.485832  | -1.510875 |
| H | 0.182710  | 2.015877  | -1.925399 |
| C | 2.219308  | 2.579654  | -0.073584 |
| C | 2.237583  | 3.818652  | 0.843764  |
| H | 1.408664  | 4.491739  | 0.597599  |
| H | 2.150876  | 3.540341  | 1.898717  |
| H | 3.177821  | 4.367287  | 0.712670  |
| C | 2.418255  | 3.064060  | -1.515429 |

|   |           |           |           |
|---|-----------|-----------|-----------|
| H | 1.646507  | 3.787827  | -1.799584 |
| H | 2.398871  | 2.244634  | -2.239878 |
| H | 3.390851  | 3.561808  | -1.595752 |
| C | 3.396360  | 1.656034  | 0.330502  |
| C | 3.480185  | 0.328376  | -0.420695 |
| C | 4.613999  | -0.560916 | 0.089929  |
| C | 4.700154  | -1.900211 | -0.640357 |
| C | 5.831298  | -2.793848 | -0.132238 |
| C | 5.900946  | -4.132772 | -0.864622 |
| H | 4.965997  | -4.692494 | -0.744647 |
| H | 6.063135  | -3.983297 | -1.938485 |
| H | 6.717021  | -4.757068 | -0.485447 |
| H | 5.696714  | -2.968461 | 0.944411  |
| H | 6.787257  | -2.262758 | -0.241127 |
| H | 3.742927  | -2.432422 | -0.535861 |
| H | 4.836151  | -1.720376 | -1.717143 |
| H | 5.571351  | -0.028420 | -0.011925 |
| H | 4.475156  | -0.742744 | 1.166061  |
| H | 3.622991  | 0.508805  | -1.494605 |
| H | 2.525781  | -0.207450 | -0.318729 |
| H | 4.329893  | 2.219110  | 0.184700  |
| H | 3.329158  | 1.448393  | 1.407309  |
| H | 1.236465  | 1.465211  | 2.221659  |
| O | -0.938876 | 0.120617  | 2.808009  |
| H | -0.233222 | 0.342926  | 3.429621  |

**Table S109.** Coordinates for global minimum of **6bd<sup>‡</sup>**.

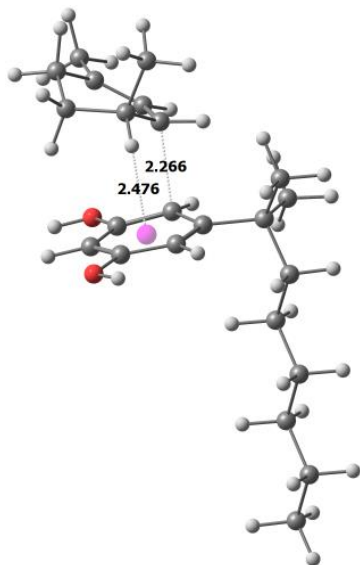

|   |           |           |          |
|---|-----------|-----------|----------|
| C | -2.605556 | -0.707239 | 0.344528 |
| C | -3.288800 | -0.133983 | 1.442732 |
| C | -4.444676 | 0.574537  | 1.281636 |
| C | -5.232538 | 1.042916  | 2.451015 |

|   |           |           |           |
|---|-----------|-----------|-----------|
| H | -4.804601 | 0.716302  | 3.400954  |
| H | -5.281643 | 2.140440  | 2.437238  |
| H | -6.270237 | 0.693307  | 2.375821  |
| C | -5.016035 | 0.826623  | -0.074205 |
| C | -3.985004 | 0.703429  | -1.191649 |
| H | -3.337152 | 1.585196  | -1.168293 |
| H | -4.481707 | 0.698203  | -2.167560 |
| C | -3.122451 | -0.555069 | -1.046560 |
| H | -2.268414 | -0.491688 | -1.736675 |
| H | -5.844065 | 0.111146  | -0.207747 |
| H | -5.490732 | 1.815641  | -0.091111 |
| H | -2.926096 | -0.343535 | 2.446534  |
| H | -2.054213 | -1.620742 | 0.543618  |
| C | -0.096563 | 1.075304  | -2.126389 |
| C | -0.746719 | 1.961882  | -1.268356 |
| C | -0.952062 | 1.562497  | 0.040089  |
| C | -0.566571 | 0.270186  | 0.487577  |
| C | 0.208708  | -0.561593 | -0.365919 |
| C | 0.382698  | -0.171041 | -1.679601 |
| H | 0.930484  | -0.793385 | -2.381829 |
| H | -0.563647 | 0.103643  | 1.558202  |
| O | -1.550838 | 2.343223  | 0.958064  |
| H | -1.818835 | 3.186350  | 0.561900  |
| H | -1.068102 | 2.935690  | -1.626677 |
| O | 0.073894  | 1.480842  | -3.398915 |
| H | 0.542922  | 0.803124  | -3.908113 |
| C | 0.849574  | -1.858119 | 0.131757  |
| C | 2.381137  | -1.777978 | -0.108986 |
| H | 2.815639  | -2.724563 | 0.242190  |
| H | 2.566786  | -1.737680 | -1.190451 |
| C | 3.099522  | -0.607913 | 0.561250  |
| H | 3.009662  | -0.681279 | 1.653004  |
| H | 2.619827  | 0.337943  | 0.270076  |
| C | 4.580882  | -0.553249 | 0.186872  |
| H | 5.061068  | -1.503657 | 0.462841  |
| H | 4.674856  | -0.465475 | -0.905619 |
| C | 5.326100  | 0.602111  | 0.853020  |
| H | 5.235678  | 0.512774  | 1.945726  |
| H | 4.843265  | 1.552340  | 0.580334  |
| C | 0.299619  | -3.049270 | -0.680105 |
| H | 0.509459  | -2.939248 | -1.748375 |
| H | 0.772053  | -3.975226 | -0.334237 |
| H | -0.783326 | -3.154842 | -0.553368 |
| C | 0.587607  | -2.123554 | 1.620851  |
| H | 0.955194  | -1.318006 | 2.262509  |
| H | -0.476069 | -2.272478 | 1.835684  |
| H | 1.108918  | -3.041799 | 1.910091  |

|   |           |           |           |
|---|-----------|-----------|-----------|
| C | 6.805454  | 0.662281  | 0.473414  |
| H | 7.286136  | -0.287743 | 0.745294  |
| H | 6.894019  | 0.751368  | -0.618372 |
| C | 7.540848  | 1.820719  | 1.144931  |
| H | 7.094341  | 2.782189  | 0.865516  |
| H | 8.597601  | 1.845698  | 0.858656  |
| H | 7.490520  | 1.735531  | 2.236695  |
| C | -3.892263 | -1.847822 | -1.399253 |
| H | -4.748533 | -1.992817 | -0.732662 |
| H | -4.258851 | -1.780080 | -2.428042 |
| H | -3.243375 | -2.725174 | -1.318592 |

**Table S110.** Coordinates for global minimum of **6bd**.

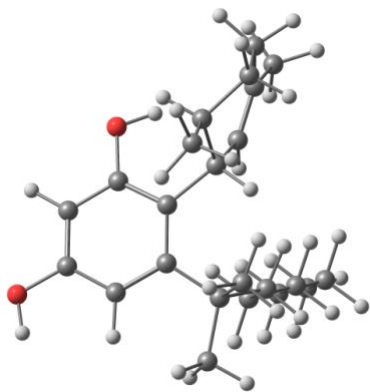

|   |           |           |           |
|---|-----------|-----------|-----------|
| C | 1.196101  | 1.000270  | -0.484036 |
| C | 0.162590  | 1.945206  | 0.099021  |
| C | 0.344218  | 3.259312  | 0.293831  |
| C | -0.708786 | 4.126798  | 0.916542  |
| H | -1.034081 | 4.902856  | 0.211734  |
| H | -0.306600 | 4.650422  | 1.793804  |
| H | -1.582757 | 3.546546  | 1.226004  |
| C | 1.627148  | 3.941088  | -0.103690 |
| C | 2.478487  | 3.083007  | -1.036584 |
| H | 3.475148  | 3.526922  | -1.153105 |
| H | 2.019025  | 3.060048  | -2.036054 |
| C | 2.606885  | 1.647502  | -0.521741 |
| C | 3.589918  | 0.841001  | -1.366561 |
| H | 3.323070  | 0.885034  | -2.429005 |
| H | 3.606834  | -0.211756 | -1.064430 |
| H | 4.602886  | 1.244524  | -1.260179 |
| H | 3.002964  | 1.695213  | 0.501556  |
| H | 2.190926  | 4.193862  | 0.808561  |
| H | 1.386259  | 4.903625  | -0.576056 |
| H | -0.789802 | 1.494873  | 0.384242  |
| H | 0.924901  | 0.826229  | -1.527106 |
| C | 1.182689  | -0.339431 | 0.244523  |
| C | 1.512483  | -0.323482 | 1.617679  |

|   |           |           |           |
|---|-----------|-----------|-----------|
| C | 1.699214  | -1.480539 | 2.365978  |
| C | 1.510250  | -2.699579 | 1.739361  |
| C | 1.071249  | -2.753154 | 0.418878  |
| C | 0.872155  | -1.593425 | -0.341695 |
| C | 0.236757  | -1.754771 | -1.745347 |
| C | 1.218749  | -1.381181 | -2.875306 |
| H | 1.488622  | -0.324975 | -2.884403 |
| H | 0.761204  | -1.613665 | -3.844274 |
| H | 2.142740  | -1.963330 | -2.786141 |
| C | -0.171206 | -3.215212 | -2.029265 |
| H | -0.678720 | -3.247823 | -2.998957 |
| H | -0.857051 | -3.619990 | -1.280039 |
| H | 0.700525  | -3.875190 | -2.093711 |
| C | -1.051930 | -0.892520 | -1.865808 |
| C | -2.085239 | -1.090261 | -0.757251 |
| C | -3.283568 | -0.153165 | -0.907357 |
| C | -4.306227 | -0.307545 | 0.216538  |
| C | -5.497059 | 0.641407  | 0.086267  |
| C | -6.511423 | 0.474441  | 1.216253  |
| H | -6.047048 | 0.668488  | 2.190194  |
| H | -7.356148 | 1.162435  | 1.103988  |
| H | -6.909925 | -0.546651 | 1.235653  |
| H | -5.131525 | 1.677735  | 0.067679  |
| H | -5.990632 | 0.471430  | -0.880925 |
| H | -4.670063 | -1.345579 | 0.238438  |
| H | -3.809544 | -0.135279 | 1.183259  |
| H | -2.926836 | 0.887911  | -0.932265 |
| H | -3.774136 | -0.333682 | -1.875470 |
| H | -1.610831 | -0.912517 | 0.218196  |
| H | -2.440702 | -2.129277 | -0.745175 |
| H | -1.510765 | -1.129396 | -2.836784 |
| H | -0.799043 | 0.171762  | -1.911039 |
| H | 0.867600  | -3.731296 | 0.000606  |
| O | 1.724120  | -3.832097 | 2.479608  |
| H | 1.528181  | -4.607490 | 1.936960  |
| H | 1.968892  | -1.417518 | 3.415406  |
| O | 1.675620  | 0.845704  | 2.315175  |
| H | 1.259557  | 1.575088  | 1.817405  |

**Table S111.** Coordinates for global minimum of **3be<sup>‡</sup>**.

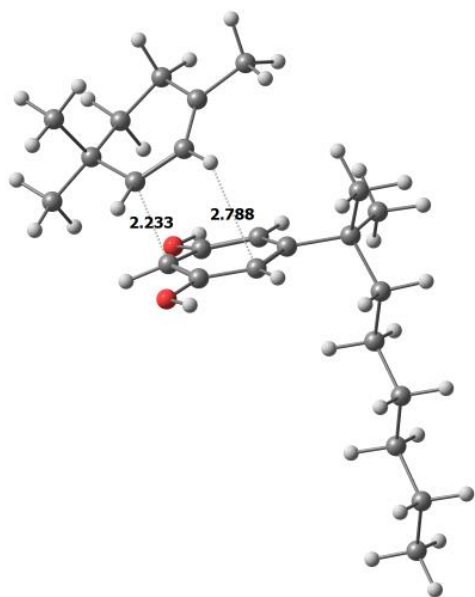

|   |           |           |           |
|---|-----------|-----------|-----------|
| C | 2.964789  | 0.773461  | 0.813546  |
| C | 2.744406  | -0.625178 | 0.944522  |
| C | 3.372039  | -1.537532 | 0.150448  |
| C | 3.223518  | -2.999717 | 0.382108  |
| H | 2.716860  | -3.456323 | -0.479141 |
| H | 4.209667  | -3.476467 | 0.443745  |
| H | 2.653821  | -3.221359 | 1.286956  |
| C | 4.306249  | -1.119663 | -0.934309 |
| C | 4.213312  | 0.357572  | -1.304631 |
| H | 3.345528  | 0.514777  | -1.952680 |
| H | 5.098477  | 0.656532  | -1.877759 |
| C | 4.075854  | 1.267021  | -0.076466 |
| H | 5.320349  | -1.377062 | -0.586179 |
| H | 4.144880  | -1.756286 | -1.814266 |
| H | 2.100492  | -0.976699 | 1.745917  |
| H | 2.793263  | 1.379703  | 1.702312  |
| C | 0.295146  | 1.169369  | 1.307362  |
| C | 1.007895  | 1.632991  | 0.165628  |
| C | 0.719084  | 1.000757  | -1.068534 |
| C | -0.004263 | -0.180777 | -1.112580 |
| C | -0.595571 | -0.688303 | 0.051777  |
| C | -0.459863 | 0.015137  | 1.260586  |
| H | -0.945816 | -0.335531 | 2.166120  |
| H | -0.149541 | -0.668844 | -2.070238 |
| O | 1.193604  | 1.605822  | -2.176277 |
| H | 0.972650  | 1.083285  | -2.962139 |
| H | 1.386266  | 2.649506  | 0.168890  |
| O | 0.470227  | 1.895891  | 2.429002  |
| H | 0.006600  | 1.480694  | 3.171729  |

|   |           |           |           |
|---|-----------|-----------|-----------|
| C | -1.424985 | -1.968478 | 0.037743  |
| C | -2.862718 | -1.656322 | 0.530433  |
| H | -3.417010 | -2.605281 | 0.532588  |
| H | -2.818583 | -1.325854 | 1.576546  |
| C | -3.630214 | -0.617534 | -0.285916 |
| H | -3.787526 | -0.981409 | -1.309829 |
| H | -3.033979 | 0.302802  | -0.369452 |
| C | -4.985161 | -0.280243 | 0.336763  |
| H | -5.575547 | -1.201790 | 0.447831  |
| H | -4.828498 | 0.110660  | 1.353000  |
| C | -5.782662 | 0.736239  | -0.478614 |
| H | -5.184355 | 1.650865  | -0.605220 |
| H | -5.954898 | 0.338022  | -1.489486 |
| C | -1.480976 | -2.622993 | -1.347594 |
| H | -2.095272 | -3.527209 | -1.287578 |
| H | -1.923274 | -1.969435 | -2.104845 |
| H | -0.481924 | -2.918439 | -1.687024 |
| C | -0.782621 | -2.977949 | 1.011905  |
| H | -0.752968 | -2.595721 | 2.036602  |
| H | -1.365465 | -3.905622 | 1.011131  |
| H | 0.240204  | -3.214099 | 0.701123  |
| C | -7.125545 | 1.097246  | 0.155969  |
| H | -6.951404 | 1.498138  | 1.164245  |
| H | -7.720648 | 0.182637  | 0.286261  |
| C | -7.915421 | 2.110715  | -0.670419 |
| H | -8.126780 | 1.718632  | -1.672090 |
| H | -8.872111 | 2.356538  | -0.197535 |
| H | -7.350579 | 3.042604  | -0.790343 |
| C | 5.337681  | 1.166282  | 0.829345  |
| H | 5.505808  | 0.150586  | 1.197055  |
| H | 6.207193  | 1.477609  | 0.240335  |
| H | 5.246723  | 1.835171  | 1.691039  |
| C | 3.932338  | 2.732755  | -0.496777 |
| H | 3.133452  | 2.866988  | -1.229530 |
| H | 3.733485  | 3.371595  | 0.371085  |
| H | 4.868733  | 3.066613  | -0.955451 |

**Table S112.** Coordinates for global minimum of **3be**.

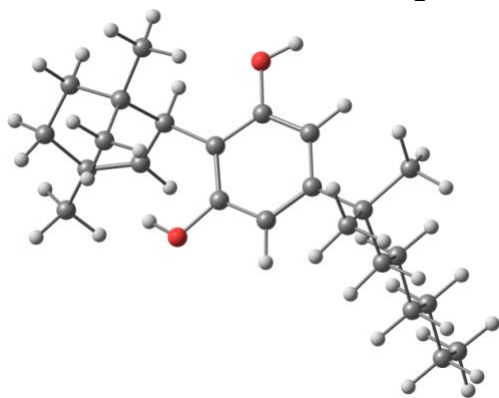

|   |           |           |           |
|---|-----------|-----------|-----------|
| C | -2.698237 | -0.311327 | -0.680135 |
| C | -2.713590 | -1.753474 | -0.214073 |
| C | -3.788621 | -2.400693 | 0.256585  |
| C | -3.727329 | -3.830418 | 0.704719  |
| H | -2.710628 | -4.230100 | 0.654660  |
| H | -4.382413 | -4.456758 | 0.085610  |
| H | -4.089913 | -3.925010 | 1.736831  |
| C | -5.129754 | -1.726769 | 0.343623  |
| C | -5.179592 | -0.426239 | -0.455759 |
| C | -3.960858 | 0.480521  | -0.205865 |
| C | -3.901806 | 0.872985  | 1.275532  |
| H | -3.815291 | 0.008813  | 1.940086  |
| H | -4.821613 | 1.405619  | 1.545164  |
| H | -3.054805 | 1.538575  | 1.472035  |
| C | -4.113988 | 1.758565  | -1.035761 |
| H | -3.255150 | 2.424110  | -0.897673 |
| H | -5.016954 | 2.299021  | -0.727716 |
| H | -4.196736 | 1.527960  | -2.103400 |
| H | -6.097091 | 0.127886  | -0.218002 |
| H | -5.218534 | -0.666196 | -1.527867 |
| H | -5.380425 | -1.553439 | 1.401373  |
| H | -5.897105 | -2.422924 | -0.023087 |
| H | -1.774038 | -2.300394 | -0.316968 |
| H | -2.765269 | -0.338329 | -1.777343 |
| C | -1.374258 | 0.366068  | -0.365508 |
| C | -0.698573 | 0.215063  | 0.860801  |
| C | 0.503471  | 0.865148  | 1.132110  |
| C | 1.107517  | 1.683757  | 0.177324  |
| C | 0.476988  | 1.823310  | -1.057684 |
| C | -0.731690 | 1.171499  | -1.315841 |
| O | -1.331718 | 1.298014  | -2.542878 |
| H | -0.785289 | 1.864818  | -3.103253 |
| H | 0.911841  | 2.432339  | -1.843963 |
| C | 2.427887  | 2.384179  | 0.507971  |
| C | 2.971758  | 3.198302  | -0.673079 |



|   |           |           |           |
|---|-----------|-----------|-----------|
| H | 3.933666  | 3.640899  | -0.392109 |
| H | 2.292143  | 4.015342  | -0.939201 |
| H | 3.132078  | 2.584675  | -1.564467 |
| C | 3.484210  | 1.339341  | 0.946480  |
| C | 3.802098  | 0.250019  | -0.076153 |
| C | 4.784801  | -0.787772 | 0.465719  |
| C | 5.123025  | -1.880611 | -0.547242 |
| C | 6.104925  | -2.920542 | -0.009202 |
| C | 6.434624  | -4.006632 | -1.031882 |
| H | 6.884150  | -3.572300 | -1.932486 |
| H | 7.138507  | -4.741164 | -0.626349 |
| H | 5.528818  | -4.542878 | -1.338154 |
| H | 7.029435  | -2.415751 | 0.304234  |
| H | 5.683374  | -3.380936 | 0.895249  |
| H | 4.196707  | -2.384716 | -0.860662 |
| H | 5.543894  | -1.419606 | -1.453198 |
| H | 5.711349  | -0.284330 | 0.779726  |
| H | 4.362740  | -1.249159 | 1.370820  |
| H | 4.222266  | 0.696963  | -0.987151 |
| H | 2.871387  | -0.253102 | -0.374890 |
| H | 3.145188  | 0.864098  | 1.876571  |
| H | 4.406604  | 1.882852  | 1.198707  |
| C | 2.193495  | 3.355535  | 1.682146  |
| H | 3.125693  | 3.877994  | 1.928002  |
| H | 1.437959  | 4.103919  | 1.417863  |
| H | 1.852534  | 2.826567  | 2.577727  |
| H | 0.955918  | 0.700864  | 2.104901  |
| O | -1.178553 | -0.576976 | 1.867550  |
| H | -1.933657 | -1.098483 | 1.535143  |

**Table S113.** Coordinates for global minimum of **6be<sup>‡</sup>**.

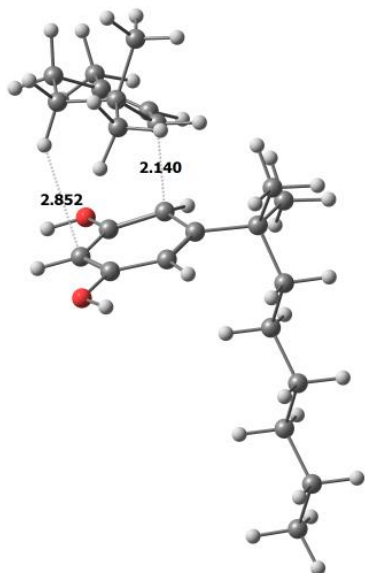

|   |           |           |           |
|---|-----------|-----------|-----------|
| C | -2.362542 | -0.102600 | -1.006978 |
| C | -2.734888 | -1.441251 | -1.346901 |
| C | -3.797548 | -2.073671 | -0.786683 |
| C | -4.192339 | -3.445877 | -1.210020 |
| H | -3.572871 | -3.821667 | -2.027342 |
| H | -4.109280 | -4.131394 | -0.355820 |
| H | -5.246271 | -3.464289 | -1.515448 |
| C | -4.667374 | -1.406912 | 0.228882  |
| C | -4.072390 | -0.129746 | 0.817061  |
| H | -3.351029 | -0.387754 | 1.600556  |
| H | -4.859198 | 0.464539  | 1.295945  |
| C | -3.362511 | 0.733375  | -0.234640 |
| H | -5.631122 | -1.200453 | -0.264491 |
| H | -4.907774 | -2.126189 | 1.022839  |
| H | -2.140451 | -1.964113 | -2.094153 |
| H | -1.836518 | 0.455203  | -1.777080 |
| C | 0.085238  | 0.947643  | 2.205084  |
| C | -0.595675 | -0.264161 | 2.325652  |
| C | -0.809381 | -1.001453 | 1.176686  |
| C | -0.456242 | -0.494538 | -0.115978 |
| C | 0.352002  | 0.691167  | -0.186115 |
| C | 0.564402  | 1.414383  | 0.965238  |
| H | 1.140239  | 2.335991  | 0.951556  |
| H | -0.289494 | -1.247490 | -0.877280 |
| O | -1.352045 | -2.228533 | 1.186416  |
| H | -1.603743 | -2.484128 | 2.087833  |
| H | -0.902323 | -0.624985 | 3.303212  |
| O | 0.281616  | 1.641190  | 3.338407  |
| H | 0.773060  | 2.456769  | 3.157203  |
| C | 1.019895  | 1.126771  | -1.492235 |
| C | 2.541195  | 1.317621  | -1.240115 |
| H | 2.988423  | 1.616284  | -2.198457 |
| H | 2.688523  | 2.164570  | -0.557585 |
| C | 3.283839  | 0.100235  | -0.690876 |
| H | 3.186782  | -0.748057 | -1.380914 |
| H | 2.827533  | -0.214061 | 0.258684  |
| C | 4.768655  | 0.384783  | -0.462496 |
| H | 5.231101  | 0.689077  | -1.412961 |
| H | 4.874716  | 1.240007  | 0.221157  |
| C | 5.525223  | -0.814303 | 0.107140  |
| H | 5.407026  | -1.674364 | -0.568524 |
| H | 5.070324  | -1.108995 | 1.064517  |
| C | 0.438064  | 2.484006  | -1.939846 |
| H | 0.967546  | 2.826679  | -2.835621 |
| H | -0.625894 | 2.402766  | -2.186363 |
| H | 0.553064  | 3.243830  | -1.160527 |
| C | 0.834889  | 0.116771  | -2.634574 |

|   |           |           |           |
|---|-----------|-----------|-----------|
| H | 1.224605  | -0.874342 | -2.386206 |
| H | -0.211929 | 0.007799  | -2.935257 |
| H | 1.384015  | 0.478302  | -3.509943 |
| C | 7.014282  | -0.542522 | 0.319138  |
| H | 7.468307  | -0.255831 | -0.639606 |
| H | 7.131963  | 0.322062  | 0.987209  |
| C | 7.756525  | -1.745206 | 0.899532  |
| H | 8.821274  | -1.530970 | 1.039614  |
| H | 7.673046  | -2.613548 | 0.235641  |
| H | 7.339834  | -2.029022 | 1.872973  |
| C | -4.366098 | 1.210440  | -1.318984 |
| H | -4.835778 | 0.377605  | -1.848450 |
| H | -5.146761 | 1.803817  | -0.830081 |
| H | -3.861594 | 1.846277  | -2.054149 |
| C | -2.763810 | 1.979479  | 0.416897  |
| H | -2.158400 | 2.549285  | -0.294955 |
| H | -3.575558 | 2.624659  | 0.769321  |
| H | -2.144011 | 1.722806  | 1.276290  |

**Table S114.** Coordinates for global minimum of **6be**.

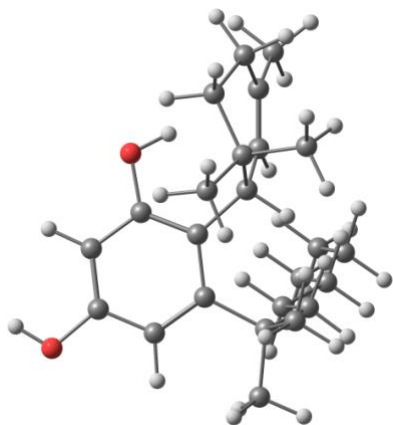

|   |           |           |           |
|---|-----------|-----------|-----------|
| C | 1.147386  | 0.765237  | -0.525604 |
| C | 0.322496  | 1.899606  | 0.037886  |
| C | 0.781904  | 3.109271  | 0.391810  |
| C | -0.132340 | 4.190983  | 0.888101  |
| H | -1.178164 | 3.870827  | 0.890326  |
| H | -0.042024 | 5.084730  | 0.256726  |
| H | 0.145128  | 4.497498  | 1.904756  |
| C | 2.241184  | 3.464081  | 0.298200  |
| C | 3.152885  | 2.245230  | 0.158063  |
| H | 3.293210  | 1.769498  | 1.133723  |
| C | 2.626133  | 1.207656  | -0.850242 |
| C | 3.586081  | 0.015228  | -0.864624 |
| H | 3.672198  | -0.435261 | 0.129945  |
| H | 3.253753  | -0.763070 | -1.558484 |
| H | 4.583409  | 0.347072  | -1.177790 |

|   |           |           |           |
|---|-----------|-----------|-----------|
| C | 2.612497  | 1.862788  | -2.243899 |
| H | 2.400595  | 1.126739  | -3.026937 |
| H | 3.588390  | 2.312164  | -2.463220 |
| H | 1.852137  | 2.648929  | -2.309661 |
| H | 4.148046  | 2.570114  | -0.172625 |
| H | 2.526157  | 4.049463  | 1.183641  |
| H | 2.372795  | 4.147873  | -0.554628 |
| H | -0.745851 | 1.695918  | 0.133532  |
| H | 0.711097  | 0.560332  | -1.501996 |
| C | 0.964945  | -0.524860 | 0.280339  |
| C | 1.275962  | -0.511844 | 1.655559  |
| C | 1.309857  | -1.661994 | 2.440119  |
| C | 0.979665  | -2.867381 | 1.848169  |
| C | 0.546638  | -2.903633 | 0.525917  |
| C | 0.501374  | -1.754294 | -0.269876 |
| C | -0.143984 | -1.893184 | -1.674753 |
| C | 0.881513  | -1.686769 | -2.807362 |
| H | 0.394926  | -1.855922 | -3.775433 |
| H | 1.704014  | -2.404010 | -2.709529 |
| H | 1.309498  | -0.684594 | -2.825478 |
| C | -0.722258 | -3.305204 | -1.906199 |
| H | -1.205599 | -3.320922 | -2.888440 |
| H | -1.471086 | -3.583450 | -1.159440 |
| H | 0.060588  | -4.070561 | -1.914553 |
| C | -1.327523 | -0.897341 | -1.848432 |
| C | -2.353736 | -0.878685 | -0.715250 |
| C | -3.439300 | 0.173367  | -0.939011 |
| C | -4.436047 | 0.262428  | 0.215373  |
| C | -5.508197 | 1.330692  | 0.005343  |
| C | -6.491767 | 1.418409  | 1.171111  |
| H | -7.009232 | 0.463270  | 1.318874  |
| H | -5.970860 | 1.661706  | 2.104581  |
| H | -7.251382 | 2.188595  | 0.999946  |
| H | -5.021122 | 2.304981  | -0.141254 |
| H | -6.054936 | 1.116561  | -0.923679 |
| H | -4.919808 | -0.715300 | 0.358064  |
| H | -3.890543 | 0.474892  | 1.147158  |
| H | -2.963518 | 1.155933  | -1.080695 |
| H | -3.978693 | -0.044792 | -1.872728 |
| H | -1.841839 | -0.670272 | 0.234393  |
| H | -2.822771 | -1.865820 | -0.605435 |
| H | -1.832205 | -1.157958 | -2.790046 |
| H | -0.960332 | 0.124869  | -1.991068 |
| H | 0.225539  | -3.863945 | 0.147337  |
| O | 1.009070  | -4.055340 | 2.529158  |
| H | 1.312432  | -3.898607 | 3.433347  |
| H | 1.577413  | -1.588203 | 3.491139  |

|   |          |          |          |
|---|----------|----------|----------|
| O | 1.577431 | 0.642472 | 2.326161 |
| H | 1.247761 | 1.398852 | 1.801901 |

**Table S115.** Coordinates for global minimum of **3b<sup>‡</sup>**.

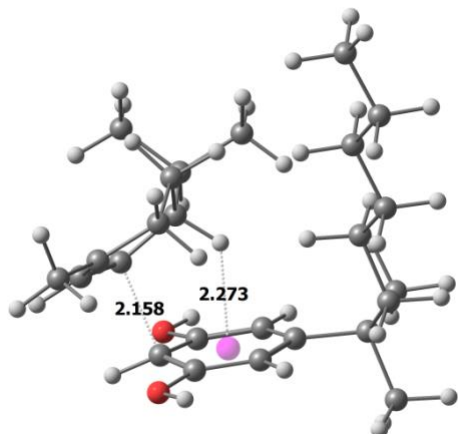

|   |           |           |           |
|---|-----------|-----------|-----------|
| C | -2.233144 | -1.232796 | 0.457264  |
| C | -2.635368 | -1.947490 | -0.703288 |
| C | -1.726934 | -2.416477 | -1.604063 |
| C | -2.134361 | -3.104247 | -2.853826 |
| H | -1.766193 | -4.139122 | -2.844523 |
| H | -3.217033 | -3.105646 | -2.997143 |
| H | -1.651934 | -2.622749 | -3.714903 |
| C | -0.265248 | -2.255887 | -1.328398 |
| C | 0.015754  | -2.305733 | 0.172690  |
| H | 1.083013  | -2.151797 | 0.358531  |
| H | -0.245676 | -3.304898 | 0.541570  |
| C | -0.797619 | -1.238596 | 0.917523  |
| H | -0.353271 | -0.267790 | 0.646643  |
| H | 0.303935  | -3.022972 | -1.865549 |
| H | 0.059111  | -1.285208 | -1.742183 |
| H | -3.698998 | -2.053694 | -0.904428 |
| H | -2.984151 | -1.120177 | 1.237578  |
| C | -1.936232 | 1.016913  | -1.220356 |
| C | -2.757881 | 0.790016  | -0.081053 |
| C | -2.394042 | 1.457515  | 1.118804  |
| C | -1.184802 | 2.122717  | 1.229946  |
| C | -0.338168 | 2.241377  | 0.115372  |
| C | -0.730352 | 1.685060  | -1.112322 |
| H | -0.109283 | 1.799311  | -1.995724 |
| H | -0.917934 | 2.567056  | 2.182887  |
| O | -3.273630 | 1.340370  | 2.132851  |
| H | -2.923070 | 1.762404  | 2.931770  |
| H | -3.797447 | 0.516905  | -0.233003 |
| O | -2.393988 | 0.494734  | -2.370847 |
| H | -1.755843 | 0.642083  | -3.086113 |
| C | 0.955467  | 3.046429  | 0.192260  |

|   |           |           |           |
|---|-----------|-----------|-----------|
| C | 2.094002  | 2.386927  | -0.623552 |
| H | 1.848377  | 2.418085  | -1.693004 |
| H | 2.978244  | 3.028082  | -0.504832 |
| C | 2.453797  | 0.954481  | -0.235917 |
| H | 1.580346  | 0.303190  | -0.380814 |
| H | 2.708473  | 0.900434  | 0.830901  |
| C | 3.618634  | 0.403149  | -1.058330 |
| H | 3.393969  | 0.518281  | -2.129103 |
| H | 4.518802  | 1.004430  | -0.864404 |
| C | 3.911780  | -1.066315 | -0.761598 |
| H | 4.087548  | -1.194696 | 0.317130  |
| H | 3.020969  | -1.666422 | -1.001951 |
| C | 0.655196  | 4.427091  | -0.436126 |
| H | 0.356244  | 4.327198  | -1.484693 |
| H | -0.147611 | 4.936496  | 0.107509  |
| H | 1.555192  | 5.050897  | -0.390166 |
| C | 1.422823  | 3.265036  | 1.638653  |
| H | 2.399786  | 3.758701  | 1.626044  |
| H | 0.736544  | 3.914075  | 2.191423  |
| H | 1.524240  | 2.323761  | 2.187981  |
| C | 5.107864  | -1.616079 | -1.537704 |
| H | 6.001769  | -1.028365 | -1.287192 |
| H | 4.935722  | -1.473147 | -2.613659 |
| C | 5.366131  | -3.094002 | -1.250013 |
| H | 5.568577  | -3.255381 | -0.184793 |
| H | 4.494434  | -3.702297 | -1.518876 |
| H | 6.225254  | -3.469878 | -1.815510 |
| C | -0.716668 | -1.335001 | 2.460767  |
| H | -1.355274 | -0.527669 | 2.849166  |
| C | 0.706313  | -1.081237 | 2.958156  |
| C | -1.257884 | -2.660458 | 3.004698  |
| H | -2.258509 | -2.885464 | 2.617536  |
| H | -0.599475 | -3.496650 | 2.746102  |
| H | -1.323510 | -2.619017 | 4.096856  |
| H | 1.386893  | -1.881102 | 2.645095  |
| H | 0.725320  | -1.041860 | 4.052486  |
| H | 1.097713  | -0.131454 | 2.575901  |

**Table S116.** Coordinates for global minimum of **3b**.

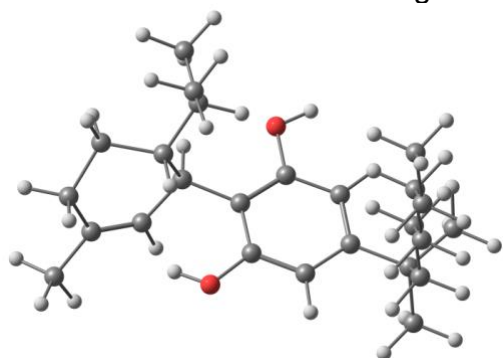

|   |           |           |           |
|---|-----------|-----------|-----------|
| C | 2.740348  | 0.293211  | -0.534346 |
| C | 3.725059  | 0.946016  | 0.414569  |
| C | 4.622752  | 0.291057  | 1.164837  |
| C | 5.535395  | 1.000357  | 2.120266  |
| H | 6.583979  | 0.856483  | 1.829462  |
| H | 5.431463  | 0.582779  | 3.130429  |
| H | 5.327198  | 2.073141  | 2.162465  |
| C | 4.769017  | -1.205195 | 1.080144  |
| C | 4.117905  | -1.775000 | -0.177585 |
| H | 4.119900  | -2.870594 | -0.136807 |
| C | 2.691408  | -1.244684 | -0.342429 |
| H | 2.158195  | -1.435134 | 0.603395  |
| C | 1.888653  | -1.953374 | -1.454929 |
| C | 1.429578  | -3.344801 | -1.007617 |
| H | 0.811022  | -3.814585 | -1.780679 |
| H | 2.283809  | -4.007067 | -0.822795 |
| H | 0.837659  | -3.288411 | -0.087018 |
| C | 2.645161  | -2.044522 | -2.783584 |
| H | 3.483216  | -2.747770 | -2.712825 |
| H | 1.977481  | -2.404461 | -3.574228 |
| H | 3.040227  | -1.073411 | -3.098989 |
| H | 0.984362  | -1.350824 | -1.622528 |
| H | 4.716886  | -1.484510 | -1.051612 |
| H | 5.837764  | -1.459099 | 1.110013  |
| H | 4.330532  | -1.660984 | 1.982285  |
| H | 3.673385  | 2.034453  | 0.480520  |
| H | 3.086902  | 0.498873  | -1.555794 |
| C | 1.361435  | 0.913387  | -0.400768 |
| C | 0.622213  | 1.314924  | -1.518092 |
| C | -0.679244 | 1.813530  | -1.415143 |
| C | -1.293580 | 1.936688  | -0.169609 |
| C | -0.564333 | 1.569123  | 0.963192  |
| C | 0.729964  | 1.069695  | 0.846035  |
| O | 1.349375  | 0.716103  | 2.014936  |
| H | 2.303550  | 0.590986  | 1.844153  |
| H | -0.985670 | 1.655124  | 1.959919  |

|   |           |           |           |
|---|-----------|-----------|-----------|
| C | -2.721641 | 2.464498  | -0.009766 |
| C | -3.390053 | 2.765378  | -1.357190 |
| H | -3.430042 | 1.887729  | -2.009497 |
| H | -2.866005 | 3.565104  | -1.892256 |
| H | -4.418141 | 3.100464  | -1.181247 |
| C | -2.679773 | 3.775530  | 0.800209  |
| H | -2.253052 | 3.617082  | 1.795642  |
| H | -2.073931 | 4.528531  | 0.283599  |
| H | -3.694181 | 4.173892  | 0.922416  |
| C | -3.576987 | 1.436742  | 0.772992  |
| C | -3.659402 | 0.039794  | 0.159948  |
| C | -4.435638 | -0.937143 | 1.043484  |
| C | -4.520513 | -2.343907 | 0.453690  |
| C | -5.287744 | -3.324674 | 1.340264  |
| C | -5.363022 | -4.728224 | 0.741609  |
| H | -5.913878 | -5.414775 | 1.393239  |
| H | -5.866860 | -4.711592 | -0.231786 |
| H | -4.359441 | -5.142103 | 0.589225  |
| H | -6.303079 | -2.939722 | 1.509079  |
| H | -4.807046 | -3.369441 | 2.327380  |
| H | -3.503753 | -2.728527 | 0.284122  |
| H | -5.000906 | -2.297044 | -0.534854 |
| H | -5.451869 | -0.550266 | 1.210795  |
| H | -3.957789 | -0.986803 | 2.033132  |
| H | -4.136862 | 0.085611  | -0.828092 |
| H | -2.643422 | -0.347905 | -0.001189 |
| H | -3.180205 | 1.350902  | 1.793537  |
| H | -4.590195 | 1.852904  | 0.872587  |
| H | -1.199085 | 2.091280  | -2.326965 |
| O | 1.220938  | 1.183776  | -2.745708 |
| H | 0.604572  | 1.479431  | -3.428516 |



**Table S117.** Coordinates for global minimum of **6b<sup>‡</sup>**.

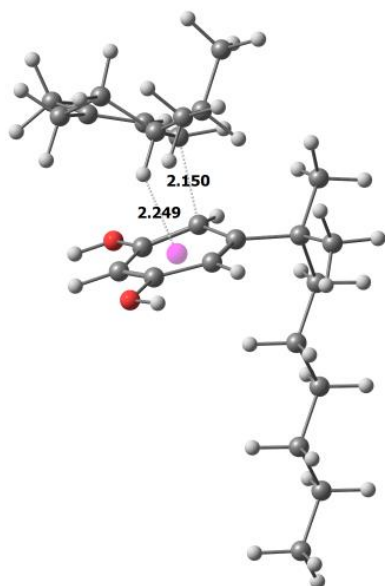

|   |           |           |           |
|---|-----------|-----------|-----------|
| C | -2.212369 | -0.065903 | -0.972376 |
| C | -2.670124 | -1.287863 | -1.547969 |
| C | -3.498617 | -2.132142 | -0.878658 |
| C | -3.939342 | -3.430808 | -1.448673 |
| H | -3.714677 | -4.240090 | -0.740731 |
| H | -5.030336 | -3.435233 | -1.574038 |
| H | -3.463702 | -3.648540 | -2.407617 |
| C | -4.013819 | -1.743697 | 0.473061  |
| C | -4.162339 | -0.226369 | 0.589435  |
| H | -4.503602 | 0.042147  | 1.593924  |
| H | -4.930994 | 0.101402  | -0.121260 |
| C | -2.832775 | 0.481810  | 0.285134  |
| H | -2.165241 | 0.242125  | 1.128080  |
| H | -4.967504 | -2.248158 | 0.666459  |
| H | -3.309267 | -2.116255 | 1.235567  |
| H | -2.298397 | -1.563384 | -2.532562 |
| H | -1.855630 | 0.672927  | -1.681233 |
| C | 0.005408  | -0.098653 | 2.181782  |
| C | -0.298426 | -1.376812 | 1.712972  |
| C | -0.319906 | -1.570822 | 0.344646  |
| C | -0.143616 | -0.483414 | -0.563627 |
| C | 0.367819  | 0.757838  | -0.055468 |
| C | 0.357308  | 0.954147  | 1.306930  |
| H | 0.681950  | 1.892539  | 1.744852  |
| H | 0.068568  | -0.754129 | -1.593916 |
| O | -0.560260 | -2.763130 | -0.219100 |
| H | -0.746116 | -3.430798 | 0.459367  |
| H | -0.494088 | -2.186051 | 2.410609  |
| O | -0.000954 | 0.072064  | 3.513170  |
| H | 0.239408  | 0.983268  | 3.739267  |

|   |           |           |           |
|---|-----------|-----------|-----------|
| C | 1.033456  | 1.746007  | -1.007235 |
| C | 2.372925  | 1.089459  | -1.464878 |
| H | 2.137877  | 0.251899  | -2.136249 |
| H | 2.896621  | 1.839624  | -2.074349 |
| C | 3.302424  | 0.591550  | -0.360280 |
| H | 2.814095  | -0.215651 | 0.203404  |
| H | 3.503256  | 1.394873  | 0.361686  |
| C | 4.630136  | 0.076237  | -0.916478 |
| H | 4.432376  | -0.726207 | -1.642568 |
| H | 5.129786  | 0.881862  | -1.474028 |
| C | 5.568570  | -0.444850 | 0.170574  |
| H | 5.065787  | -1.246395 | 0.731963  |
| H | 5.769116  | 0.359239  | 0.894190  |
| C | 1.316605  | 3.098044  | -0.339778 |
| H | 2.014385  | 3.019961  | 0.498129  |
| H | 1.763203  | 3.770552  | -1.078819 |
| H | 0.391241  | 3.560397  | 0.022652  |
| C | 0.202143  | 2.015444  | -2.273974 |
| H | -0.033883 | 1.099985  | -2.826207 |
| H | -0.727778 | 2.545716  | -2.041513 |
| H | 0.786188  | 2.654547  | -2.944468 |
| C | 6.894769  | -0.970059 | -0.378358 |
| H | 6.693340  | -1.775202 | -1.098662 |
| H | 7.393996  | -0.169607 | -0.941934 |
| C | 7.825433  | -1.483347 | 0.718994  |
| H | 8.768419  | -1.855286 | 0.304717  |
| H | 7.357274  | -2.302406 | 1.277396  |
| H | 8.063627  | -0.687075 | 1.433838  |
| C | -2.920690 | 2.023825  | 0.236031  |
| H | -1.910314 | 2.371984  | -0.025198 |
| C | -3.261142 | 2.607225  | 1.607758  |
| C | -3.886507 | 2.538521  | -0.834206 |
| H | -4.927254 | 2.322905  | -0.568842 |
| H | -3.790923 | 3.624623  | -0.935953 |
| H | -3.688657 | 2.092534  | -1.816154 |
| H | -4.279556 | 2.341961  | 1.913309  |
| H | -3.198631 | 3.700266  | 1.582844  |
| H | -2.568603 | 2.243186  | 2.376335  |

**Table S118.** Coordinates for global minimum of **6b**.

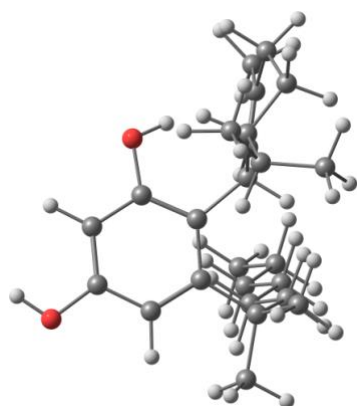

|   |           |           |           |
|---|-----------|-----------|-----------|
| C | 0.960751  | 0.835558  | -0.272891 |
| C | -0.063713 | 1.829883  | 0.239438  |
| C | 0.194891  | 3.095272  | 0.600782  |
| C | -0.862864 | 3.997782  | 1.162905  |
| H | -1.011475 | 4.867231  | 0.509700  |
| H | -0.553435 | 4.391060  | 2.140248  |
| H | -1.819119 | 3.480094  | 1.281066  |
| C | 1.576263  | 3.678072  | 0.460358  |
| C | 2.442510  | 2.864591  | -0.497085 |
| H | 3.473912  | 3.237334  | -0.478700 |
| H | 2.067080  | 3.007764  | -1.519338 |
| C | 2.414295  | 1.374582  | -0.143881 |
| C | 3.427807  | 0.533935  | -0.955664 |
| C | 4.808275  | 0.557944  | -0.292226 |
| H | 5.192542  | 1.583481  | -0.223560 |
| H | 4.764948  | 0.144441  | 0.721676  |
| H | 5.531604  | -0.028958 | -0.869831 |
| C | 3.549319  | 0.965665  | -2.422168 |
| H | 4.092543  | 0.206957  | -2.996581 |
| H | 2.576759  | 1.115384  | -2.902763 |
| H | 4.104830  | 1.906865  | -2.506572 |
| H | 3.070358  | -0.505713 | -0.930524 |
| H | 2.711903  | 1.289824  | 0.909280  |
| H | 1.491569  | 4.717693  | 0.115096  |
| H | 2.046137  | 3.733123  | 1.455817  |
| H | -1.080314 | 1.449494  | 0.349216  |
| H | 0.776822  | 0.695767  | -1.340955 |
| C | 0.780845  | -0.512686 | 0.431151  |
| C | 1.002773  | -0.535931 | 1.826066  |
| C | 1.056198  | -1.713020 | 2.567911  |
| C | 0.829229  | -2.909755 | 1.911715  |
| C | 0.473735  | -2.915616 | 0.566524  |
| C | 0.412134  | -1.739099 | -0.187928 |
| C | -0.129990 | -1.852002 | -1.634612 |
| C | -0.665365 | -3.265465 | -1.943722 |

|   |           |           |           |
|---|-----------|-----------|-----------|
| H | -1.109429 | -3.252578 | -2.944723 |
| H | 0.136134  | -4.011424 | -1.951187 |
| H | -1.435326 | -3.592680 | -1.239658 |
| C | 0.976474  | -1.596186 | -2.676046 |
| H | 1.359656  | -0.577253 | -2.649314 |
| H | 0.581355  | -1.775889 | -3.683116 |
| H | 1.819172  | -2.277361 | -2.512481 |
| C | -1.306493 | -0.864422 | -1.867227 |
| C | -2.462234 | -0.964256 | -0.871321 |
| C | -3.525365 | 0.107592  | -1.111312 |
| C | -4.666824 | 0.058395  | -0.097019 |
| C | -5.712724 | 1.151442  | -0.312312 |
| C | -6.850363 | 1.089305  | 0.705654  |
| H | -7.586407 | 1.882364  | 0.536067  |
| H | -6.467294 | 1.199151  | 1.726998  |
| H | -7.373511 | 0.127602  | 0.648524  |
| H | -6.121219 | 1.065417  | -1.328922 |
| H | -5.222356 | 2.133609  | -0.259114 |
| H | -5.155156 | -0.926305 | -0.143573 |
| H | -4.252497 | 0.149184  | 0.918360  |
| H | -3.933190 | -0.000640 | -2.127310 |
| H | -3.052609 | 1.100919  | -1.074602 |
| H | -2.933302 | -1.954559 | -0.927670 |
| H | -2.072650 | -0.862617 | 0.151602  |
| H | -0.946239 | 0.169159  | -1.870189 |
| H | -1.686000 | -1.047698 | -2.882969 |
| H | 0.228986  | -3.874959 | 0.131614  |
| O | 0.887473  | -4.121121 | 2.548515  |
| H | 1.137057  | -3.984822 | 3.472114  |
| H | 1.252799  | -1.668288 | 3.636045  |
| O | 1.187742  | 0.607823  | 2.559495  |
| H | 0.839583  | 1.366619  | 2.053022  |

**Table S119.** Coordinates for global minimum of **3bf<sup>‡</sup>**.

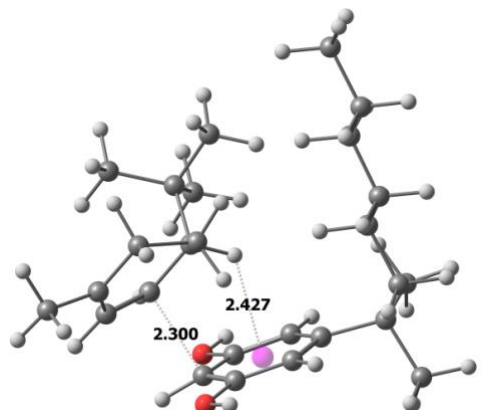

|   |           |           |          |
|---|-----------|-----------|----------|
| C | -2.406573 | -0.542584 | 0.276276 |
|---|-----------|-----------|----------|

|   |           |           |           |
|---|-----------|-----------|-----------|
| C | -3.193423 | -1.113970 | -0.747079 |
| C | -2.722813 | -2.107220 | -1.560046 |
| C | -3.617383 | -2.812973 | -2.511400 |
| H | -3.261747 | -2.640010 | -3.536606 |
| H | -3.560143 | -3.897424 | -2.352129 |
| H | -4.655429 | -2.484368 | -2.432463 |
| C | -1.310881 | -2.571661 | -1.470376 |
| C | -0.399891 | -1.576956 | -0.760895 |
| H | -0.203528 | -0.750347 | -1.453830 |
| H | 0.569685  | -2.033092 | -0.552218 |
| C | -0.998743 | -0.961890 | 0.514220  |
| H | -0.409453 | -0.059908 | 0.738592  |
| H | -1.320922 | -3.555724 | -0.976296 |
| H | -0.938262 | -2.774443 | -2.483376 |
| H | -4.238210 | -0.819891 | -0.817893 |
| H | -2.953423 | -0.137576 | 1.123610  |
| C | -1.501584 | 1.641629  | -1.412247 |
| C | -2.414076 | 1.674545  | -0.333634 |
| C | -1.960235 | 2.210246  | 0.891459  |
| C | -0.631718 | 2.559952  | 1.074719  |
| C | 0.275598  | 2.468174  | 0.006968  |
| C | -0.174463 | 2.004089  | -1.237956 |
| H | 0.500723  | 1.947931  | -2.086477 |
| H | -0.316887 | 2.925251  | 2.046214  |
| O | -2.889479 | 2.300330  | 1.868982  |
| H | -2.480290 | 2.613963  | 2.689062  |
| H | -3.479137 | 1.597239  | -0.523902 |
| O | -2.003571 | 1.209608  | -2.587898 |
| H | -1.306001 | 1.182016  | -3.260106 |
| C | 1.714798  | 2.960872  | 0.151731  |
| C | 2.720963  | 2.007573  | -0.535101 |
| H | 2.495957  | 1.944476  | -1.607462 |
| H | 3.708967  | 2.483766  | -0.466499 |
| C | 2.803101  | 0.596573  | 0.042728  |
| H | 1.800359  | 0.147622  | 0.068929  |
| H | 3.154973  | 0.634020  | 1.082118  |
| C | 3.732768  | -0.305536 | -0.769404 |
| H | 3.358258  | -0.372899 | -1.801797 |
| H | 4.727658  | 0.159783  | -0.831414 |
| C | 3.868115  | -1.711406 | -0.188034 |
| H | 4.242169  | -1.645724 | 0.844518  |
| H | 2.873044  | -2.175443 | -0.123490 |
| C | 1.786941  | 4.330173  | -0.562366 |
| H | 2.794571  | 4.747130  | -0.453206 |
| H | 1.566918  | 4.231395  | -1.630383 |
| H | 1.071305  | 5.034472  | -0.124698 |
| C | 2.119828  | 3.158513  | 1.619171  |

|   |           |           |           |
|---|-----------|-----------|-----------|
| H | 1.955959  | 2.256563  | 2.217246  |
| H | 3.185090  | 3.407366  | 1.665754  |
| H | 1.568777  | 3.983612  | 2.081689  |
| C | 4.789612  | -2.617786 | -1.002968 |
| H | 5.789029  | -2.164090 | -1.055349 |
| H | 4.420173  | -2.671013 | -2.036629 |
| C | 4.892920  | -4.026313 | -0.420726 |
| H | 3.908691  | -4.508540 | -0.388884 |
| H | 5.558428  | -4.660338 | -1.015901 |
| H | 5.282629  | -3.998399 | 0.603489  |
| C | -0.911508 | -1.796521 | 1.859439  |
| C | -1.986087 | -2.888189 | 1.958427  |
| C | -1.073230 | -0.823639 | 3.039052  |
| H | -0.282644 | -0.063996 | 3.025793  |
| H | -2.041722 | -0.311982 | 3.031385  |
| H | -1.002276 | -1.373276 | 3.983945  |
| H | -1.849804 | -3.446233 | 2.891565  |
| H | -1.922117 | -3.604277 | 1.133691  |
| H | -2.997222 | -2.466962 | 1.969869  |
| C | 0.475659  | -2.441012 | 1.962689  |
| H | 0.598110  | -2.869939 | 2.963570  |
| H | 0.608845  | -3.250107 | 1.237282  |
| H | 1.270876  | -1.702176 | 1.809523  |

**Table S120.** Coordinates for global minimum of **3bf**.

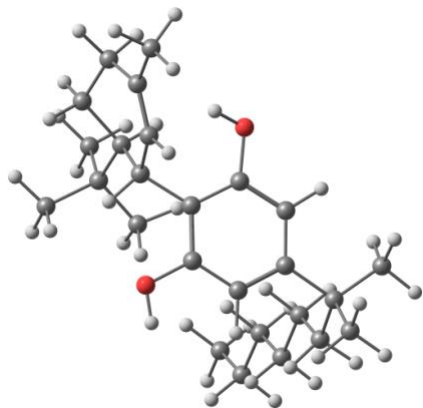

|   |           |           |           |
|---|-----------|-----------|-----------|
| C | -2.560757 | -0.070754 | 0.642854  |
| C | -3.721697 | 0.875077  | 0.375888  |
| C | -4.775616 | 0.626425  | -0.411867 |
| C | -5.825955 | 1.656780  | -0.701882 |
| H | -5.930248 | 1.802435  | -1.785225 |
| H | -5.589044 | 2.620552  | -0.242383 |
| H | -6.805482 | 1.323181  | -0.335877 |
| C | -4.960883 | -0.732281 | -1.027110 |
| C | -4.109370 | -1.780823 | -0.319874 |
| H | -4.212163 | -2.738337 | -0.837010 |
| H | -4.501433 | -1.920170 | 0.697015  |

|   |           |           |           |
|---|-----------|-----------|-----------|
| C | -2.633750 | -1.355607 | -0.239677 |
| H | -2.316279 | -1.080548 | -1.257578 |
| C | -1.700909 | -2.537355 | 0.183558  |
| C | -1.761932 | -3.631762 | -0.900481 |
| H | -1.496945 | -3.220784 | -1.882472 |
| H | -1.045169 | -4.426054 | -0.663437 |
| H | -2.748505 | -4.096870 | -0.978410 |
| C | -2.121127 | -3.149293 | 1.527861  |
| H | -3.124080 | -3.586234 | 1.480921  |
| H | -1.423079 | -3.947859 | 1.805587  |
| H | -2.107475 | -2.405458 | 2.332497  |
| C | -0.229250 | -2.102488 | 0.283592  |
| H | 0.090447  | -1.552861 | -0.609953 |
| H | 0.405537  | -2.991369 | 0.382304  |
| H | -0.048410 | -1.471066 | 1.154784  |
| H | -6.024194 | -1.005095 | -0.974522 |
| H | -4.715771 | -0.691774 | -2.100746 |
| H | -3.627603 | 1.858691  | 0.838823  |
| H | -2.621034 | -0.379192 | 1.693819  |
| C | -1.282865 | 0.739325  | 0.485840  |
| C | -0.388711 | 0.933052  | 1.547956  |
| C | 0.818195  | 1.605207  | 1.388518  |
| C | 1.180619  | 2.136027  | 0.145124  |
| C | 0.273668  | 2.023832  | -0.904002 |
| C | -0.942348 | 1.360061  | -0.722500 |
| O | -1.776984 | 1.325573  | -1.809530 |
| H | -2.679424 | 1.121459  | -1.501239 |
| H | 0.475251  | 2.444066  | -1.882612 |
| C | 2.546491  | 2.805536  | -0.015452 |
| C | 2.632807  | 4.018100  | 0.931894  |
| H | 1.851372  | 4.748440  | 0.693516  |
| H | 2.515557  | 3.721189  | 1.978839  |
| H | 3.607225  | 4.509630  | 0.825015  |
| C | 2.786774  | 3.308391  | -1.444543 |
| H | 3.787881  | 3.748964  | -1.506532 |
| H | 2.725483  | 2.505753  | -2.185471 |
| H | 2.061963  | 4.082364  | -1.719599 |
| C | 3.659663  | 1.799203  | 0.373696  |
| C | 3.657157  | 0.481808  | -0.400031 |
| C | 4.697981  | -0.506630 | 0.125581  |
| C | 4.689895  | -1.838441 | -0.622833 |
| C | 5.715490  | -2.837991 | -0.089078 |
| C | 5.693084  | -4.167151 | -0.841910 |
| H | 6.434238  | -4.867978 | -0.443111 |
| H | 4.707680  | -4.641947 | -0.767501 |
| H | 5.910388  | -4.017707 | -1.905996 |
| H | 5.523907  | -3.015043 | 0.978478  |

|   |           |           |           |
|---|-----------|-----------|-----------|
| H | 6.718702  | -2.393862 | -0.152949 |
| H | 3.684835  | -2.282833 | -0.560461 |
| H | 4.880843  | -1.658254 | -1.691153 |
| H | 4.512769  | -0.690636 | 1.194364  |
| H | 5.699474  | -0.056014 | 0.058671  |
| H | 2.660883  | 0.021223  | -0.332330 |
| H | 3.843614  | 0.667009  | -1.466473 |
| H | 4.628520  | 2.302560  | 0.239932  |
| H | 3.575002  | 1.577619  | 1.446315  |
| H | 1.485554  | 1.688729  | 2.242802  |
| O | -0.732797 | 0.387795  | 2.760194  |
| H | -0.022244 | 0.556905  | 3.393043  |

**Table S121.** Coordinates for global minimum of **6bf<sup>‡</sup>**.

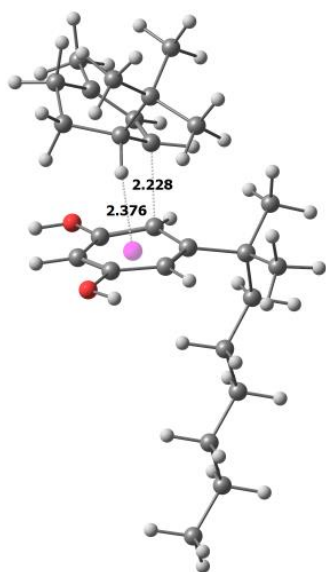

|   |          |           |           |
|---|----------|-----------|-----------|
| C | 2.046697 | 0.119682  | -0.766920 |
| C | 2.449484 | 1.249141  | -1.531096 |
| C | 3.469368 | 2.065452  | -1.147513 |
| C | 3.989625 | 3.129889  | -2.047013 |
| H | 3.860416 | 4.110146  | -1.568734 |
| H | 5.069776 | 3.005083  | -2.197203 |
| H | 3.487581 | 3.137087  | -3.016862 |
| C | 4.162207 | 1.874418  | 0.159966  |
| C | 3.352813 | 1.034894  | 1.140862  |
| H | 2.534787 | 1.658592  | 1.516429  |
| H | 3.957362 | 0.774860  | 2.012181  |
| C | 2.720277 | -0.221347 | 0.520106  |
| H | 1.952477 | -0.575195 | 1.225421  |
| H | 5.149353 | 1.432763  | -0.047291 |
| H | 4.381272 | 2.858975  | 0.594512  |
| H | 1.988276 | 1.396396  | -2.505637 |
| H | 1.669939 | -0.714830 | -1.345062 |



|   |           |           |           |
|---|-----------|-----------|-----------|
| C | -0.333555 | -0.191952 | 2.242115  |
| C | -0.009280 | 1.132260  | 1.954899  |
| C | 0.072532  | 1.502664  | 0.623035  |
| C | -0.110484 | 0.552941  | -0.416870 |
| C | -0.627014 | -0.740822 | -0.098096 |
| C | -0.653704 | -1.120263 | 1.225564  |
| H | -0.984516 | -2.109962 | 1.523433  |
| H | -0.246147 | 0.947994  | -1.418241 |
| O | 0.368592  | 2.753039  | 0.226822  |
| H | 0.541342  | 3.320891  | 0.993412  |
| H | 0.173062  | 1.839433  | 2.758901  |
| O | -0.373162 | -0.536667 | 3.541393  |
| H | -0.623197 | -1.467918 | 3.637075  |
| C | -1.246851 | -1.595981 | -1.198502 |
| C | -2.590165 | -0.909308 | -1.597011 |
| H | -2.362224 | 0.009439  | -2.155295 |
| H | -3.089902 | -1.587572 | -2.303219 |
| C | -3.545531 | -0.568844 | -0.454753 |
| H | -3.088622 | 0.187627  | 0.198289  |
| H | -3.720508 | -1.453755 | 0.172315  |
| C | -4.886870 | -0.041943 | -0.964887 |
| H | -4.711866 | 0.827780  | -1.615441 |
| H | -5.365296 | -0.807299 | -1.593173 |
| C | -5.837596 | 0.355018  | 0.163595  |
| H | -5.356965 | 1.121394  | 0.789589  |
| H | -6.009930 | -0.513470 | 0.816607  |
| C | -1.514863 | -3.034225 | -0.736469 |
| H | -0.589174 | -3.519142 | -0.406151 |
| H | -2.242718 | -3.089006 | 0.077661  |
| H | -1.916659 | -3.608624 | -1.577160 |
| C | -0.377546 | -1.668530 | -2.467126 |
| H | 0.528450  | -2.261173 | -2.301910 |
| H | -0.951608 | -2.166646 | -3.255564 |
| H | -0.094461 | -0.681643 | -2.846878 |
| C | -7.181406 | 0.883380  | -0.336989 |
| H | -7.007458 | 1.747623  | -0.993147 |
| H | -7.662235 | 0.115488  | -0.958795 |
| C | -8.118355 | 1.284021  | 0.801403  |
| H | -7.668084 | 2.069675  | 1.419235  |
| H | -8.330468 | 0.428407  | 1.453114  |
| H | -9.073628 | 1.661374  | 0.421587  |
| C | 3.650118  | -1.490435 | 0.326307  |
| C | 4.502763  | -1.424270 | -0.949247 |
| C | 2.755173  | -2.737830 | 0.263323  |
| H | 2.183930  | -2.855438 | 1.191570  |
| H | 2.041980  | -2.698855 | -0.566612 |
| H | 3.371779  | -3.632642 | 0.123923  |

|   |          |           |           |
|---|----------|-----------|-----------|
| H | 5.148890 | -0.541546 | -0.968283 |
| H | 3.885577 | -1.417156 | -1.854315 |
| H | 5.148849 | -2.308137 | -0.997608 |
| C | 4.577245 | -1.632706 | 1.539970  |
| H | 4.013323 | -1.603827 | 2.479754  |
| H | 5.094870 | -2.596800 | 1.484564  |
| H | 5.339290 | -0.847432 | 1.566018  |

**Table S122.** Coordinates for global minimum of **6bf**.

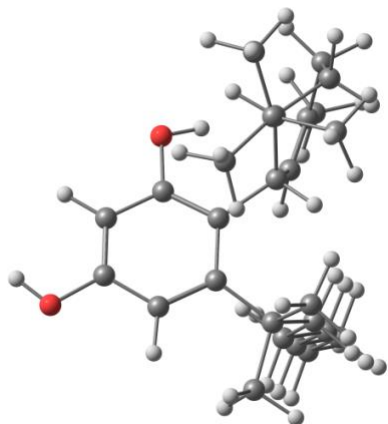

|   |           |           |           |
|---|-----------|-----------|-----------|
| C | 0.897045  | 0.784489  | -0.261174 |
| C | -0.233146 | 1.689299  | 0.214008  |
| C | -0.126722 | 2.976701  | 0.568708  |
| C | 1.173914  | 3.709409  | 0.407236  |
| C | 2.136151  | 2.938350  | -0.489045 |
| H | 1.753351  | 2.961294  | -1.518862 |
| H | 3.106362  | 3.443495  | -0.499687 |
| C | 2.287980  | 1.473212  | -0.041186 |
| H | 2.494493  | 1.483933  | 1.036754  |
| C | 3.546085  | 0.806444  | -0.686373 |
| C | 3.627558  | 1.060909  | -2.199473 |
| H | 2.710974  | 0.764633  | -2.718342 |
| H | 3.810208  | 2.117143  | -2.421826 |
| H | 4.453510  | 0.482580  | -2.629695 |
| C | 3.605279  | -0.704847 | -0.423990 |
| H | 4.568789  | -1.095958 | -0.772978 |
| H | 3.515414  | -0.924656 | 0.646242  |
| H | 2.812575  | -1.247860 | -0.940326 |
| C | 4.802108  | 1.411923  | -0.027719 |
| H | 5.702749  | 0.964465  | -0.463967 |
| H | 4.811550  | 1.206564  | 1.049505  |
| H | 4.872151  | 2.494698  | -0.169712 |
| H | 0.973493  | 4.705983  | -0.011294 |
| H | 1.621986  | 3.887870  | 1.398159  |
| C | -1.286251 | 3.751334  | 1.120766  |
| H | -2.175441 | 3.124233  | 1.235325  |

|   |           |           |           |
|---|-----------|-----------|-----------|
| H | -1.533576 | 4.595145  | 0.463768  |
| H | -1.032558 | 4.180602  | 2.099042  |
| H | -1.199437 | 1.199093  | 0.328701  |
| H | 0.791157  | 0.647620  | -1.340283 |
| C | 0.697503  | -0.576308 | 0.416541  |
| C | 0.892622  | -0.634076 | 1.811601  |
| C | 0.938389  | -1.829145 | 2.524638  |
| C | 0.714315  | -3.007363 | 1.834781  |
| C | 0.349217  | -2.973428 | 0.491894  |
| C | 0.293656  | -1.777840 | -0.231492 |
| C | -0.277473 | -1.849786 | -1.673234 |
| C | -0.861387 | -3.242039 | -1.990959 |
| H | -1.616291 | -3.561553 | -1.267637 |
| H | -1.336707 | -3.198681 | -2.976787 |
| H | -0.081161 | -4.008737 | -2.037756 |
| C | 0.802154  | -1.608832 | -2.745953 |
| H | 1.622686  | -2.326357 | -2.637277 |
| H | 0.361629  | -1.745426 | -3.740695 |
| H | 1.222133  | -0.603721 | -2.710045 |
| C | -1.425359 | -0.822964 | -1.868969 |
| C | -2.590485 | -0.928737 | -0.884878 |
| C | -3.625617 | 0.175996  | -1.097928 |
| C | -4.766405 | 0.135000  | -0.082718 |
| C | -5.786906 | 1.255480  | -0.277983 |
| C | -6.926928 | 1.200213  | 0.737696  |
| H | -7.644180 | 2.013169  | 0.582574  |
| H | -6.542799 | 1.281535  | 1.761275  |
| H | -7.471869 | 0.252065  | 0.661376  |
| H | -6.196065 | 1.197850  | -1.296304 |
| H | -5.273992 | 2.224981  | -0.205874 |
| H | -4.348751 | 0.199101  | 0.933364  |
| H | -5.277174 | -0.837340 | -0.145585 |
| H | -4.037300 | 0.099266  | -2.115160 |
| H | -3.128609 | 1.156586  | -1.042152 |
| H | -3.085460 | -1.903976 | -0.981235 |
| H | -2.208834 | -0.876628 | 0.144957  |
| H | -1.033139 | 0.198416  | -1.833934 |
| H | -1.806599 | -0.958336 | -2.891647 |
| H | 0.089463  | -3.918668 | 0.035179  |
| O | 0.771725  | -4.236920 | 2.436089  |
| H | 1.028334  | -4.127992 | 3.361325  |
| H | 1.126156  | -1.812614 | 3.595147  |
| O | 1.063146  | 0.493763  | 2.575163  |
| H | 0.697192  | 1.256683  | 2.090889  |

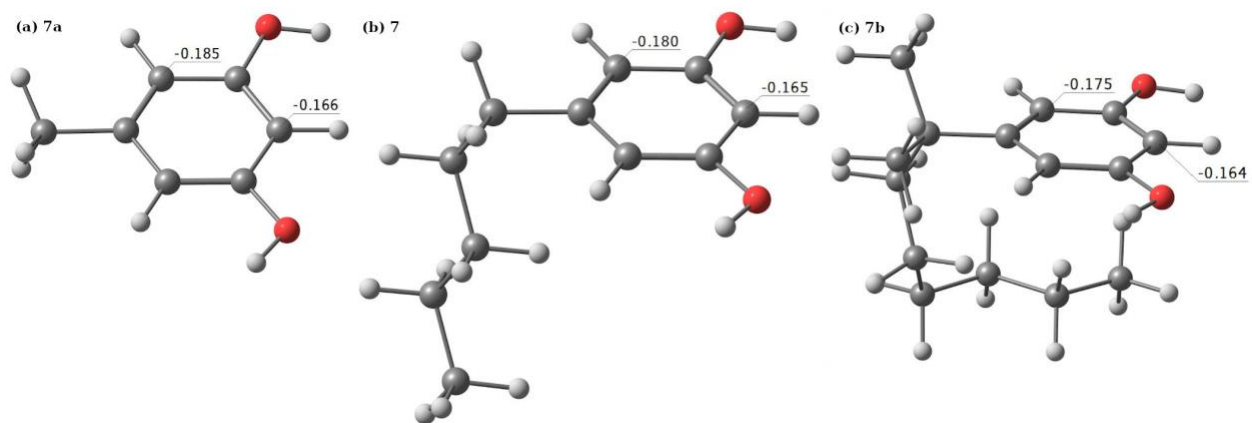

**Figure S1.** Relevant Löwdin partial charges for **7-7b**.

## References:

- S1. Hamon, D. P.G.; Kellie L Tuck, K. L. Asymmetric Synthesis of (S)-1-Methyl-2-cyclohexen-1-ol, a Constituent of the Aggregation Pheromone of *Dendroctonus pseudotsugae*. *Tetrahedron*. **2000**, *56*, 4829-4835.
- S2. Kolb, A.; Zuo, W.; Siewert, J.; Harms, K.; von Zezschwitz, P. Improved Synthesis of Cyclic Tertiary Allylic Alcohols by Asymmetric 1,2-Addition of AlMe<sub>3</sub> to Enones. *Chem. Eur. J.* **2013**, *19*, 16366-16373.
- S3. Huang, L.; Ranganayakulu, K.; Sorensen, T. S.; Cycloallyl-bicycloalkyl cation interconversions. *J. Am. Chem. Soc.* **1973**, *95*, 1936-1944.
- S4. Zhang, P.; Wang, Y.; Bao R.;, Luo, T.; Yang, Z.; Tang, Y. Enantioselective Biomimetic Total Syntheses of Katsumadain and Katsumadain C. *Organic Letters*. **2012**, *14*, 162-165.
- S5. Binder, C. M.; Bautista, A.; Zaidlewicz, M.; Krzemiński, M. P.; Oliver, A.; Singaram, B. Dual Stereoselectivity in the Dialkylzinc Reaction Using (-)-β-Pinene Derived Amino Alcohol Chiral Auxiliaries. *J. Org. Chem.* **2009**, *74*, 2337-2343.
- S6. Dauben, W. G.; Michno D. M. Direct oxidation of tertiary allylic alcohols. A simple and effective method for alkylative carbonyl transposition. *J. Org. Chem.* **1977**, *42*, 682-685.
- S7. E. A. Mash, T. M. Gregg, M. A. Kaczynski. Diastereoselective manipulations of bicyclo[m.1.0.]alkane derivatives. 2. Nucleophilic additions to the carbonyl carbons of bicyclo[m.1.0]alkan-2-ones. *J. Org. Chem.* **1996**, *61*, 2743–2752.
- S8. Chiu, I-C.; Kohn, H. Syntheses and Reactivity of trans -6-Azabicyclo[3.1.0]hexan-2-ol Derivatives and Indano[1,2-h]aziridine. Structural Analogues of Mitomycin C. *J. Org. Chem.* **1983**, *48*, 2857–2866.
- S9. Wu, Z.; Madduri, A.V.R.; Harutyunyan, S.R.; Minnaard, A.J. Catalytic Asymmetric Synthesis of Dihydrofurans and Cyclopentenols with Tertiary Stereocenters. *Eur. J. Org. Chem.* **2014**, *2014*, 575-582.
- S10. Hua, D. H.; Venkataraman, S.; Chan, R. Y. C.; Paukstelis, J. V. Enantioselective total synthesis of (+)-12,13-epoxytrichothec-9-ene and its antipode. *J. Am. Chem. Soc.* **1988**, *110*, 4741-4748.
- S11. Mori, K. Synthesis of (1S,4R)-4-isopropyl-1-methyl-2-cyclohexen-1-ol, the aggregation pheromone of the ambrosia beetle *Platypus quercivorus*, its racemate, (1R,4R)- and (1S,4S)-isomers. *Tetrahedron: Asymmetry*. **2006**, *17*, 2133-2142.

- S12. Pracht, P.; Bohle, F.; Grimme, S., Automated exploration of the low-energy chemical space with fast quantum chemical methods. *Phys. Chem. Chem. Phys.* **2020**, *22*, 7169-7192.
- S13. Neese, F., The ORCA program system. *Wiley Interdisciplinary Reviews: Comput. Mol. Sci.* **2012**, *2*, 73-78.
- S14. Neese, F., Software update: the ORCA program system, version 4.0. *Wiley Interdiscip. Rev. Comput. Mol. Sci.* **2018**, *8*, e1327.
- S15. Neese, F.; Wennmohs, F.; Becker, U.; Riplinger, C., The ORCA quantum chemistry program package. *J. Chem. Phys.* **2020**, *152*, 224108.
- S16. Neese, F., Software update: The ORCA program system—Version 5.0. *WIREs Comput. Mol. Sci.* **2022**, *12*, e1606.
- S17. Grimme, S.; Hansen, A.; Ehlert, S.; Mewes, J.-M., r2SCAN-3c: A “Swiss army knife” composite electronic-structure method. *J. Chem. Phys.* **2021**, *154*, 064103.
- S18. Guo, Y.; Riplinger, C.; Becker, U.; Liakos, D. G.; Minenkov, Y.; Cavallo, L.; Neese, F., Communication: An improved linear scaling perturbative triples correction for the domain based local pair-natural orbital based singles and doubles coupled cluster method [DLPNO-CCSD(T)]. *J. Chem. Phys.* **2018**, *148*, 011101.
- S19. Liakos, D. G.; Guo, Y.; Neese, F., Comprehensive Benchmark Results for the Domain Based Local Pair Natural Orbital Coupled Cluster Method (DLPNO-CCSD(T)) for Closed- and Open-Shell Systems. *J. Phys. Chem. A.* **2020**, *124*, 90-100.
- S20. Neese, F.; Hansen, A.; Liakos, D. G., Efficient and accurate approximations to the local coupled cluster singles doubles method using a truncated pair natural orbital basis. *J. Chem. Phys.* **2009**, *131*, 064103.
- S21. Baek, S.-H. Spectroscopic Methods for Distinguishing Primary and Secondary Alkylation Products. *Bull. Korean Chem. Soc.* **1993**, *14*, 144-146.

## **$^1\text{H}$ and $^{13}\text{C}$ NMR Spectra of Reported Compounds:**

Synthesis of ( $\pm$ )-3 from olivetol and ( $\pm$ )-10:

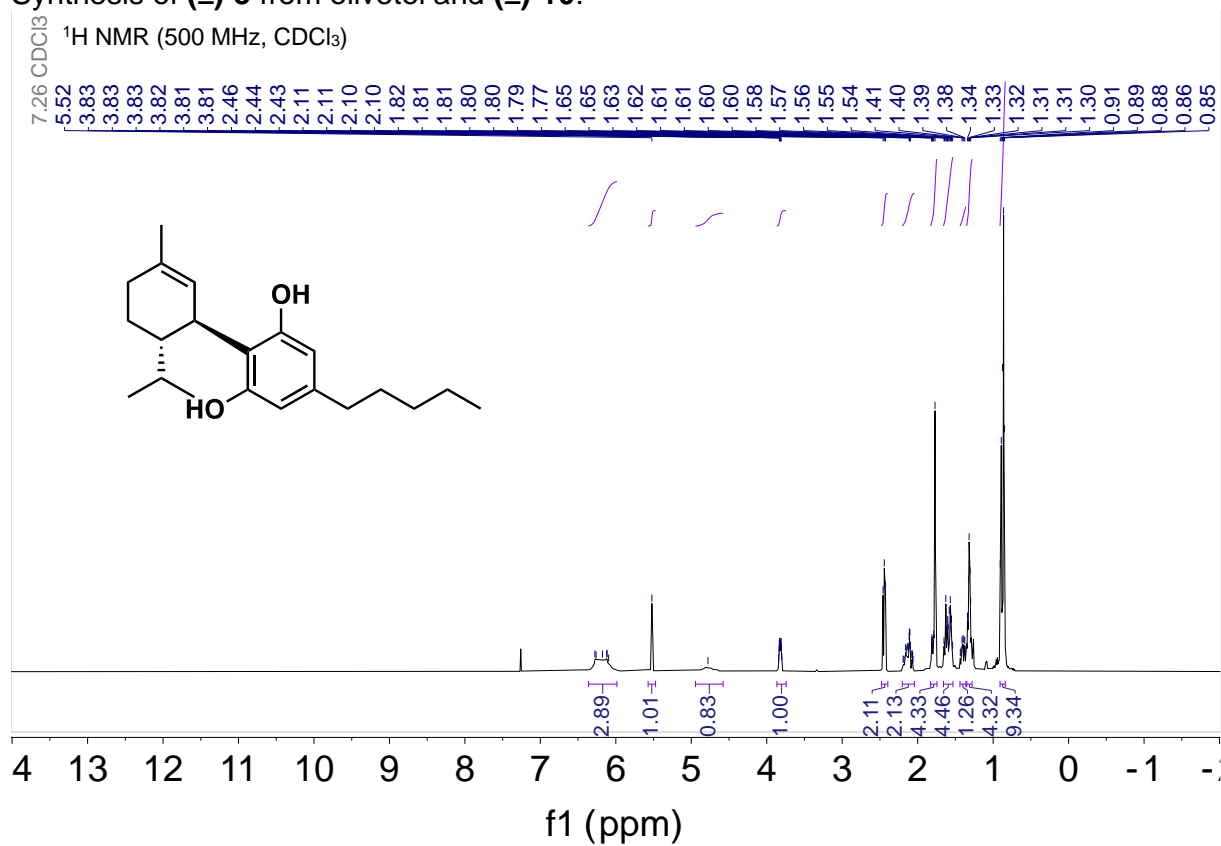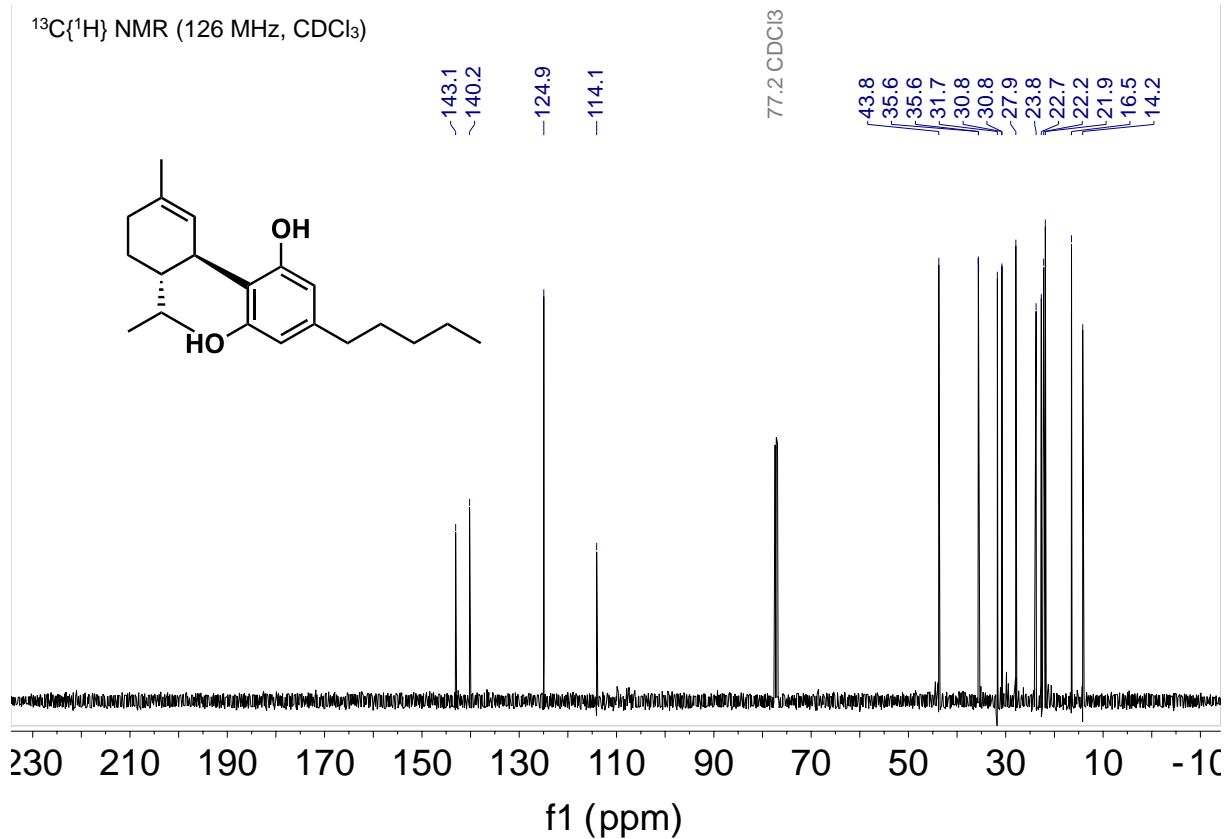



Synthesis of ( $\pm$ )-6 from olivetol and ( $\pm$ )-10:

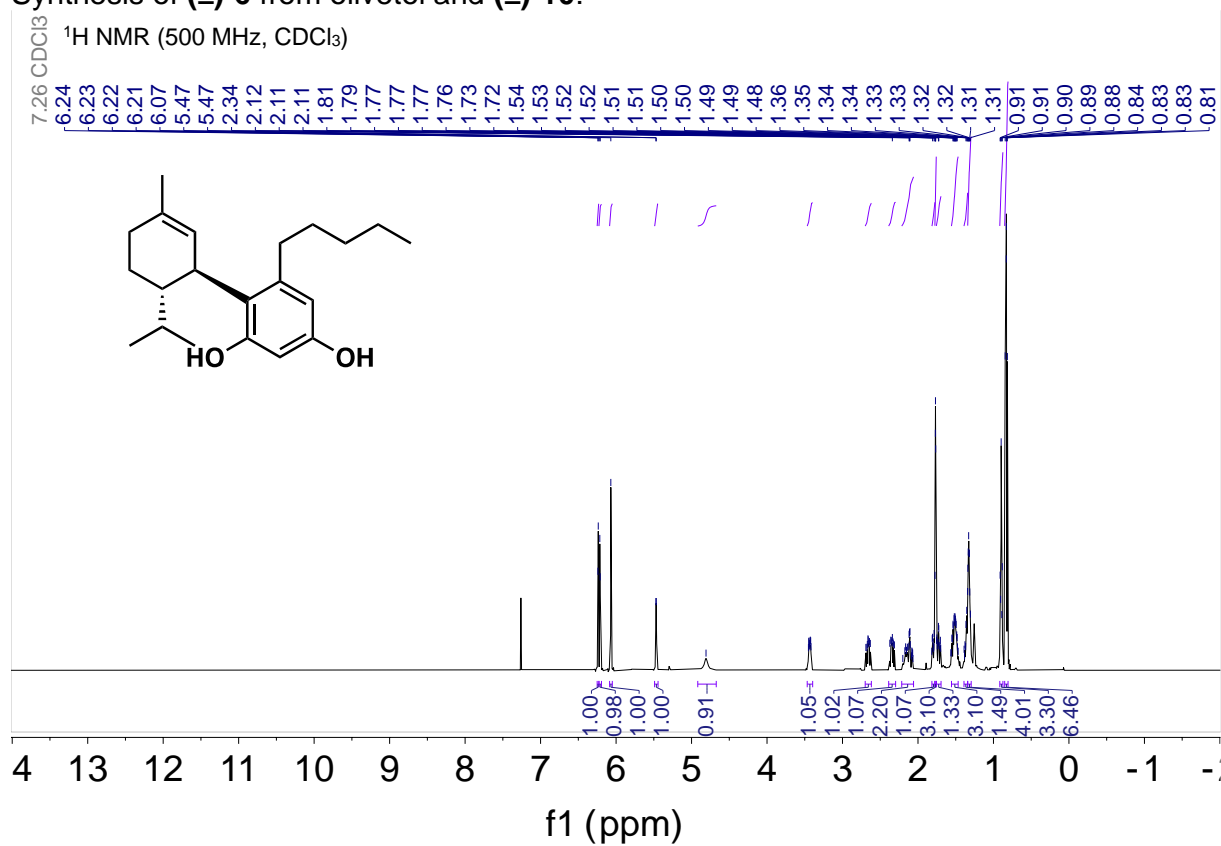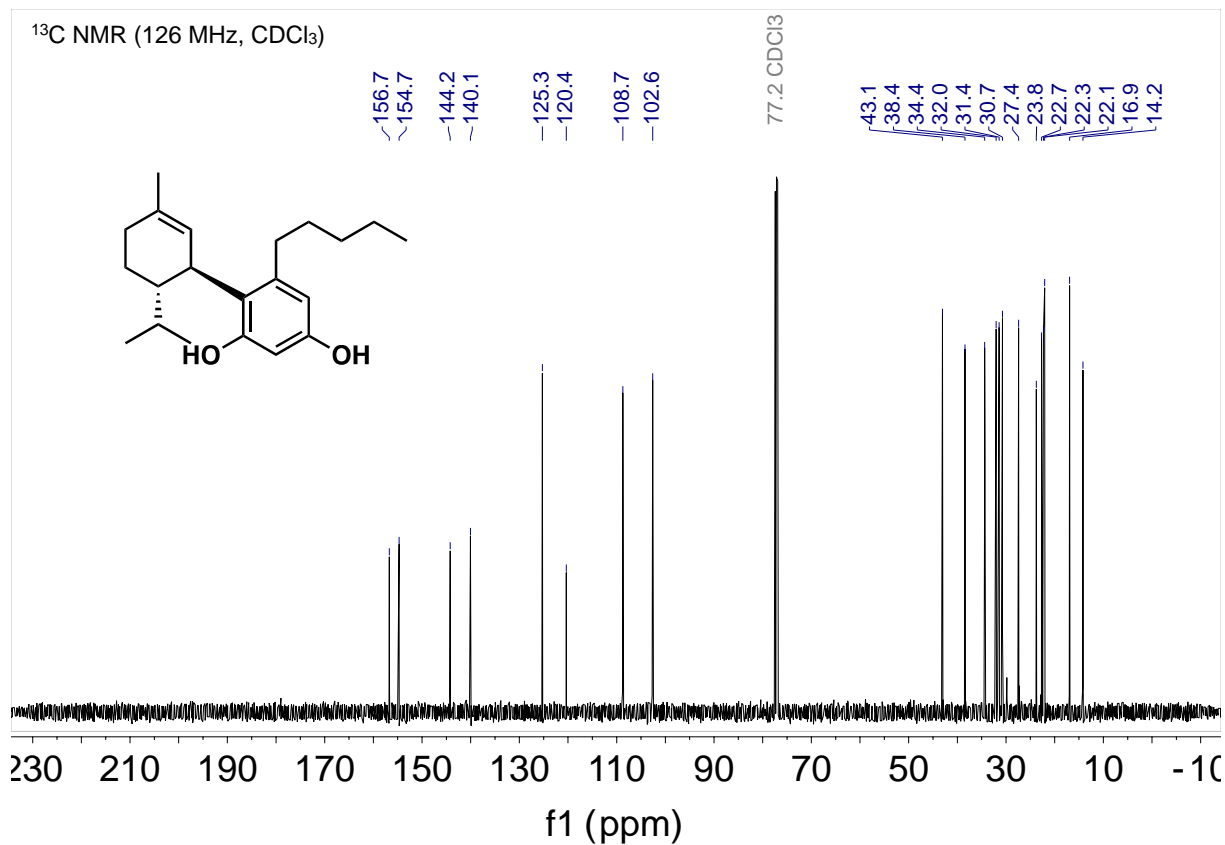

Synthesis of **11a** from olivetol and ( $\pm$ )-**10**:

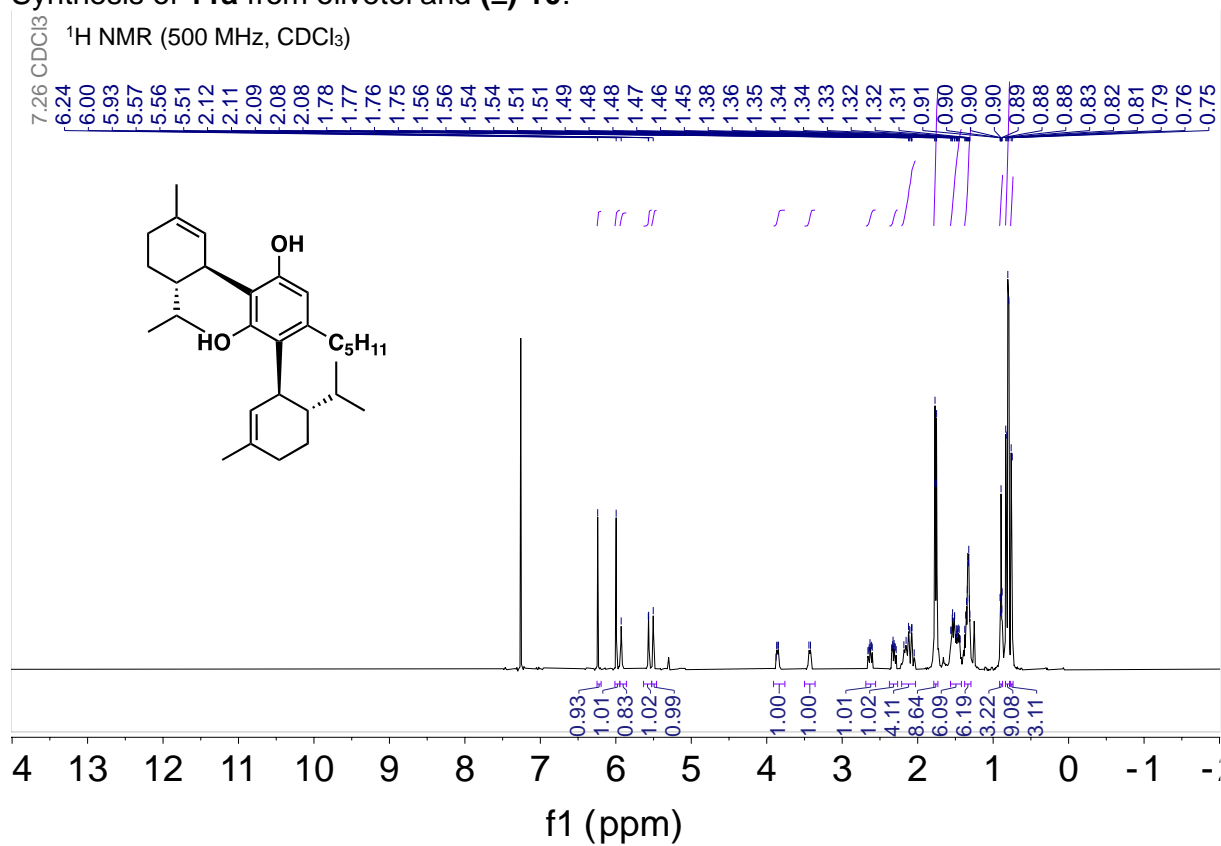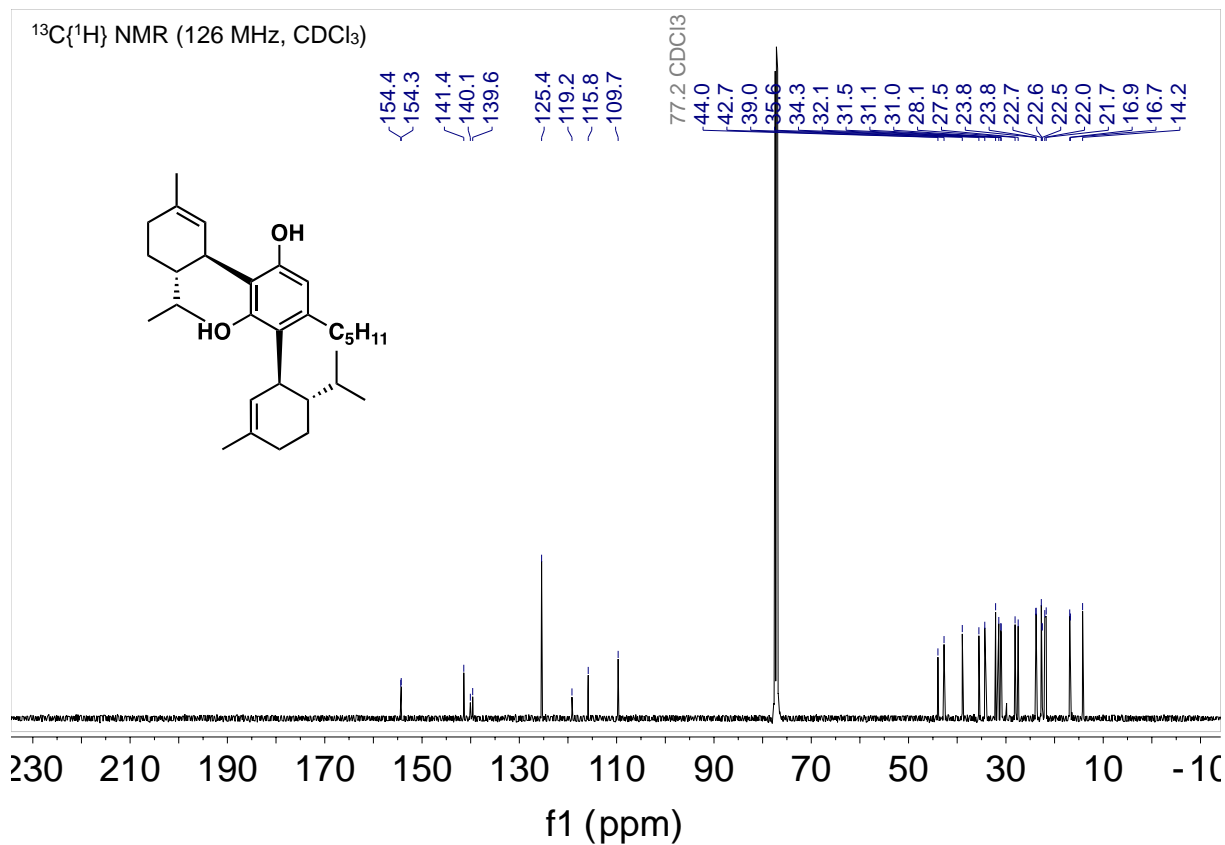

Synthesis of **11b** from olivetol and ( $\pm$ )-**10**:

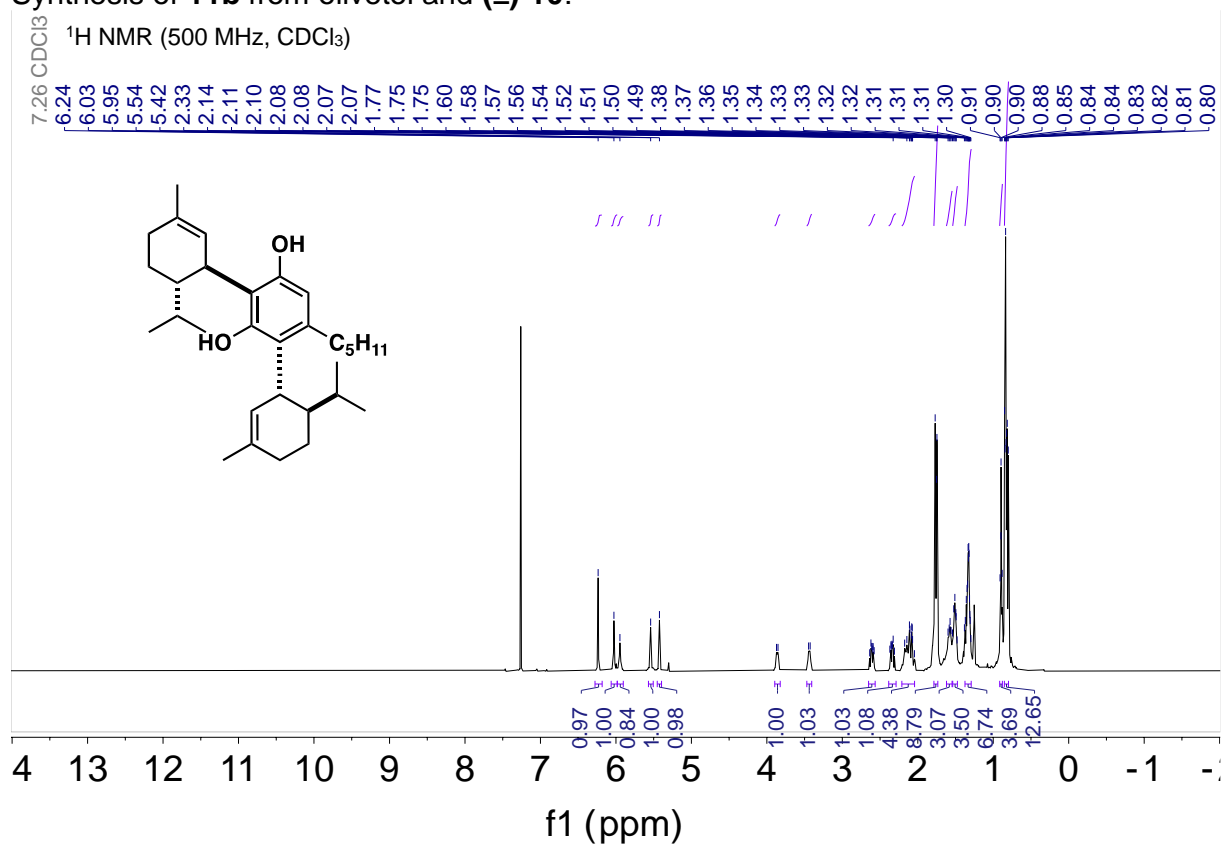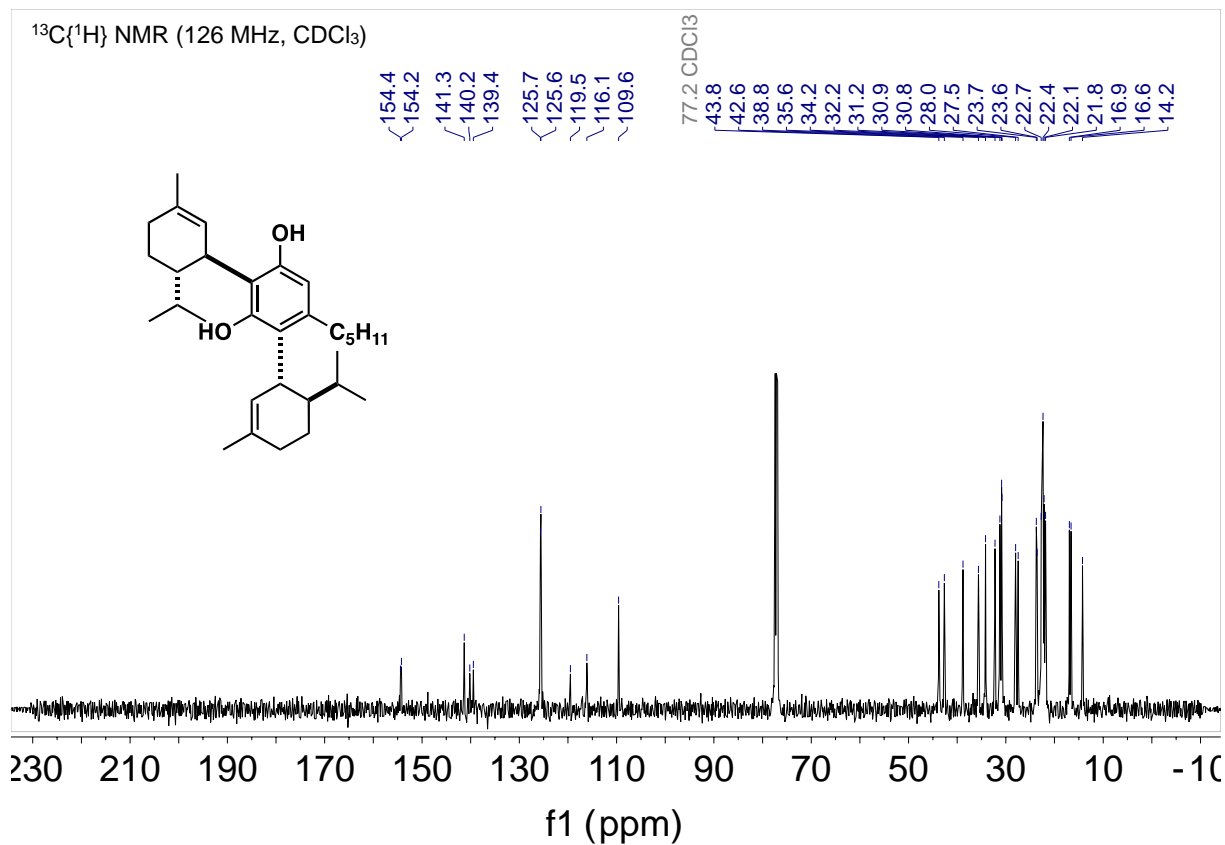

Synthesis of ( $\pm$ )-12 from olivetol and ( $\pm$ )-10:

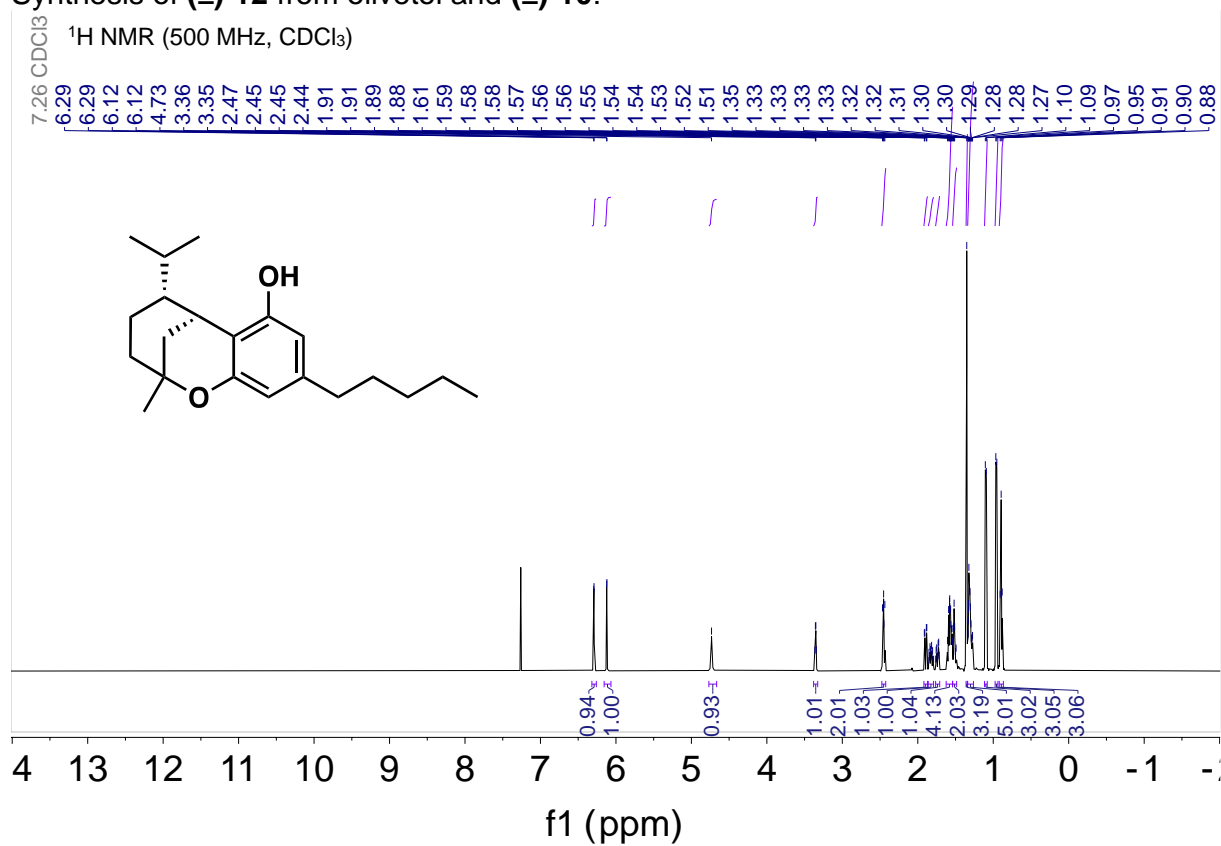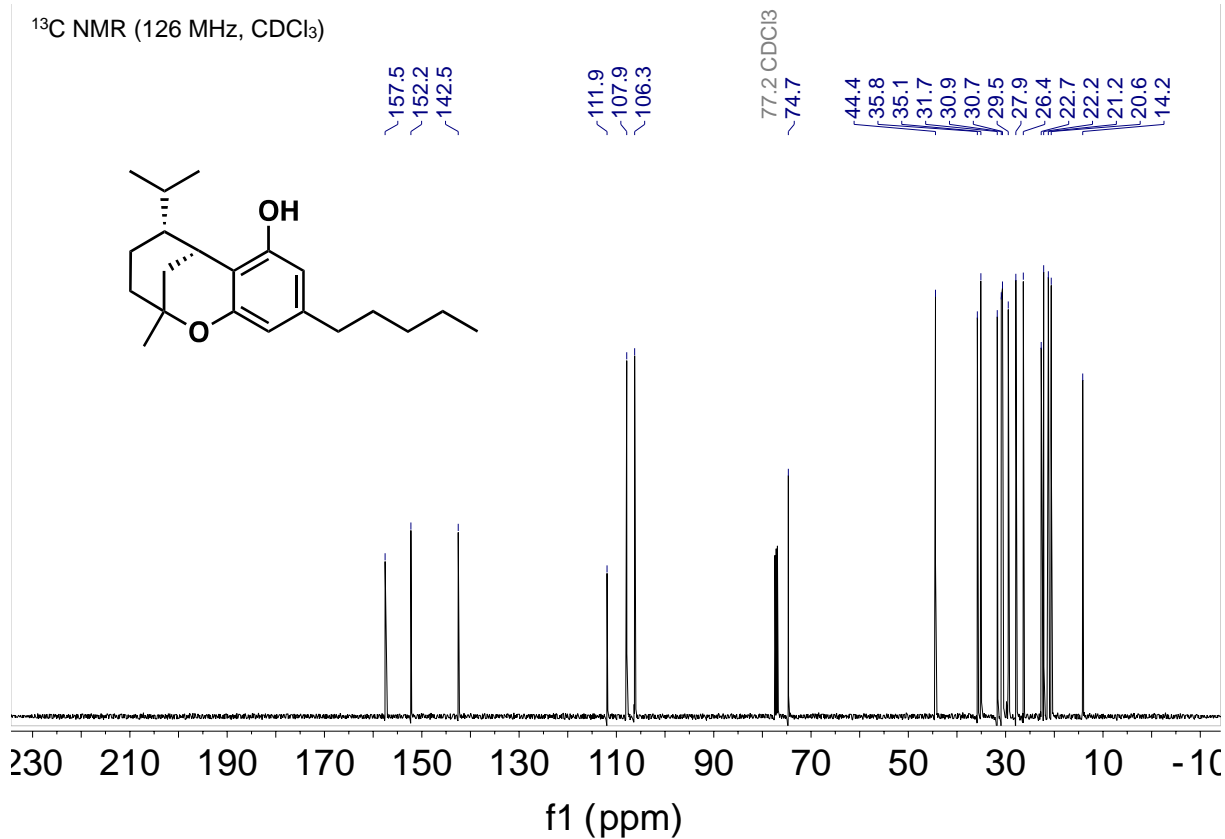

Synthesis of ( $\pm$ )-13 from divarinol and ( $\pm$ )-10c:

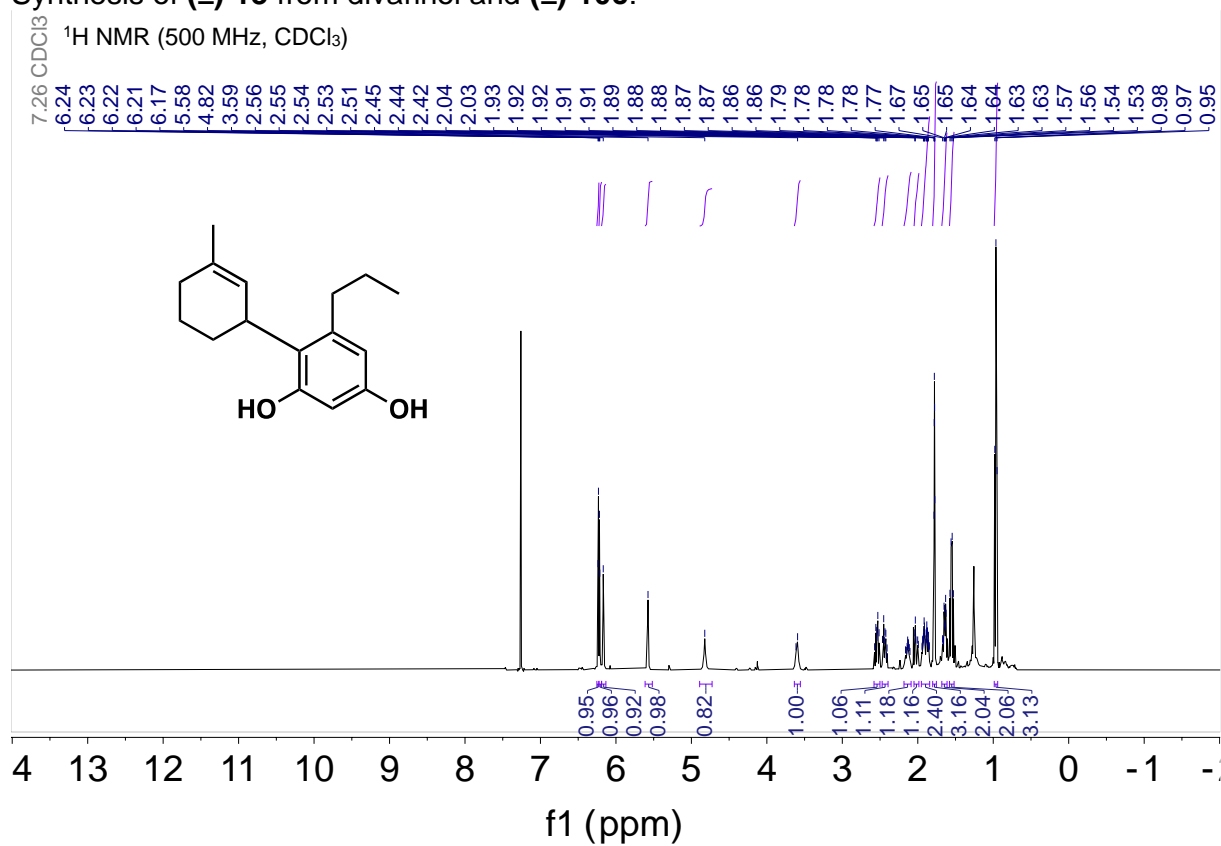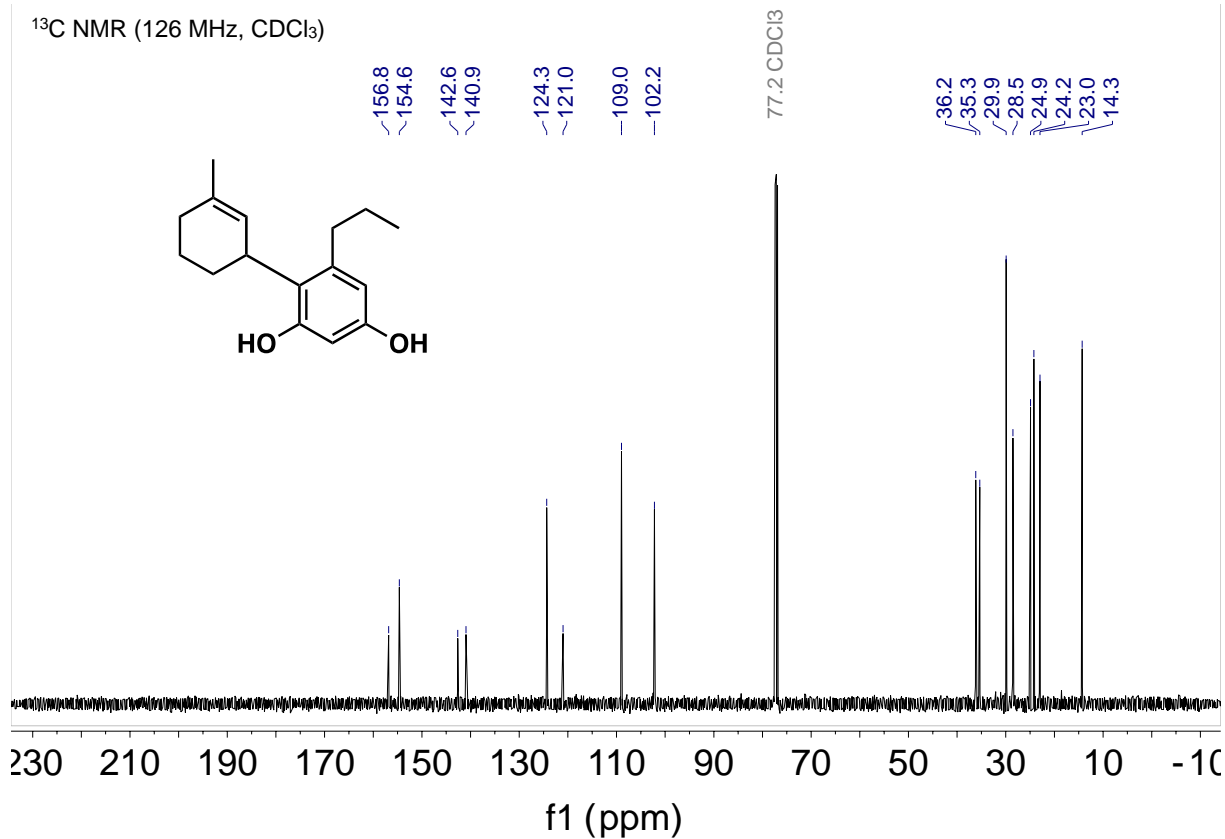

Synthesis of ( $\pm$ )-14 from divarinol and ( $\pm$ )-10c:

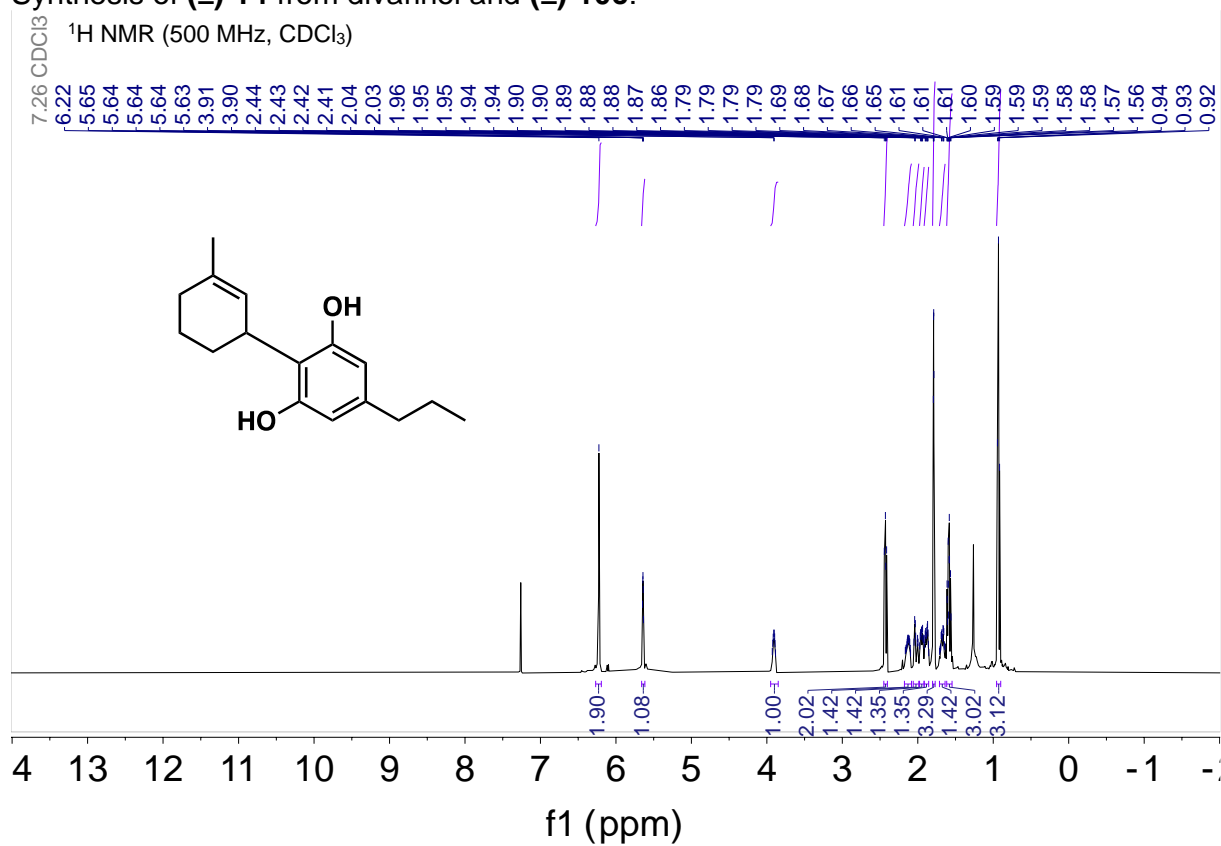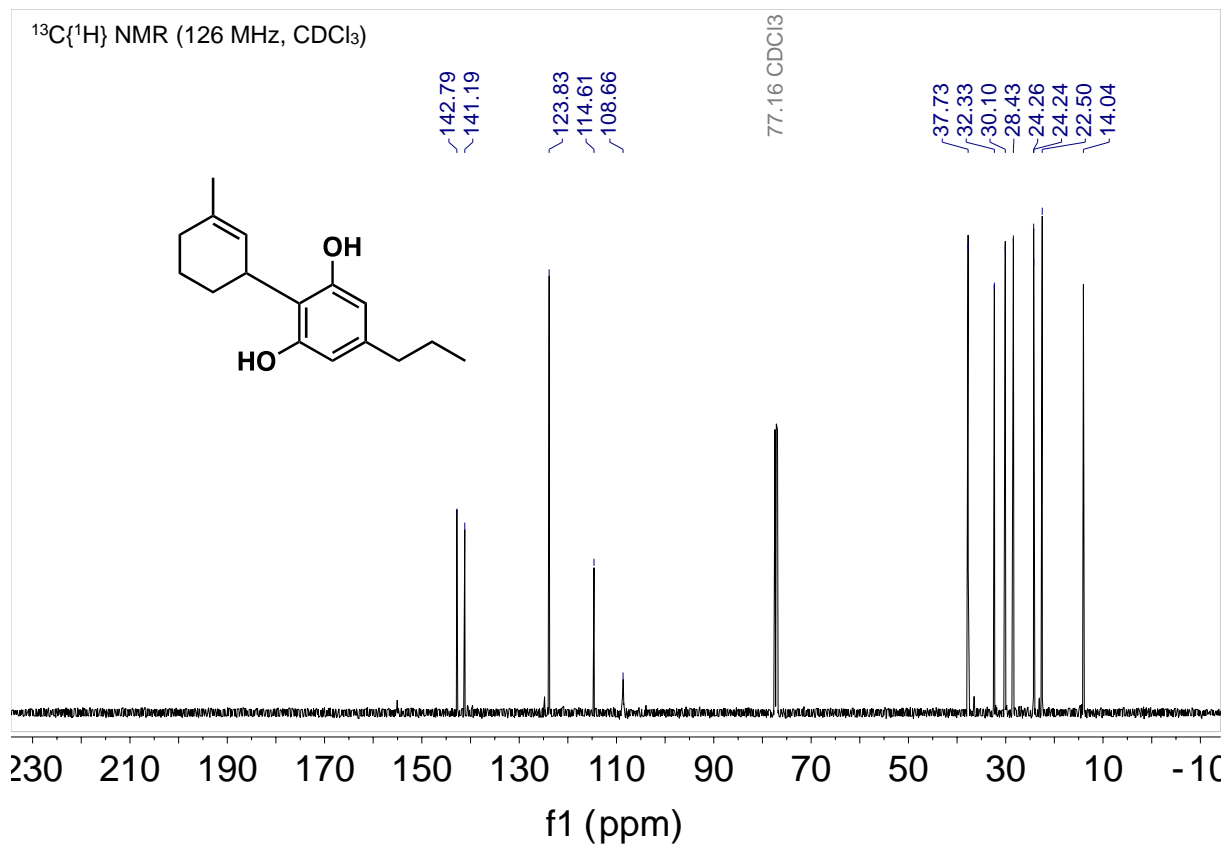

Synthesis of ( $\pm$ )-**3ac** from orcinol and ( $\pm$ )-**10c**:

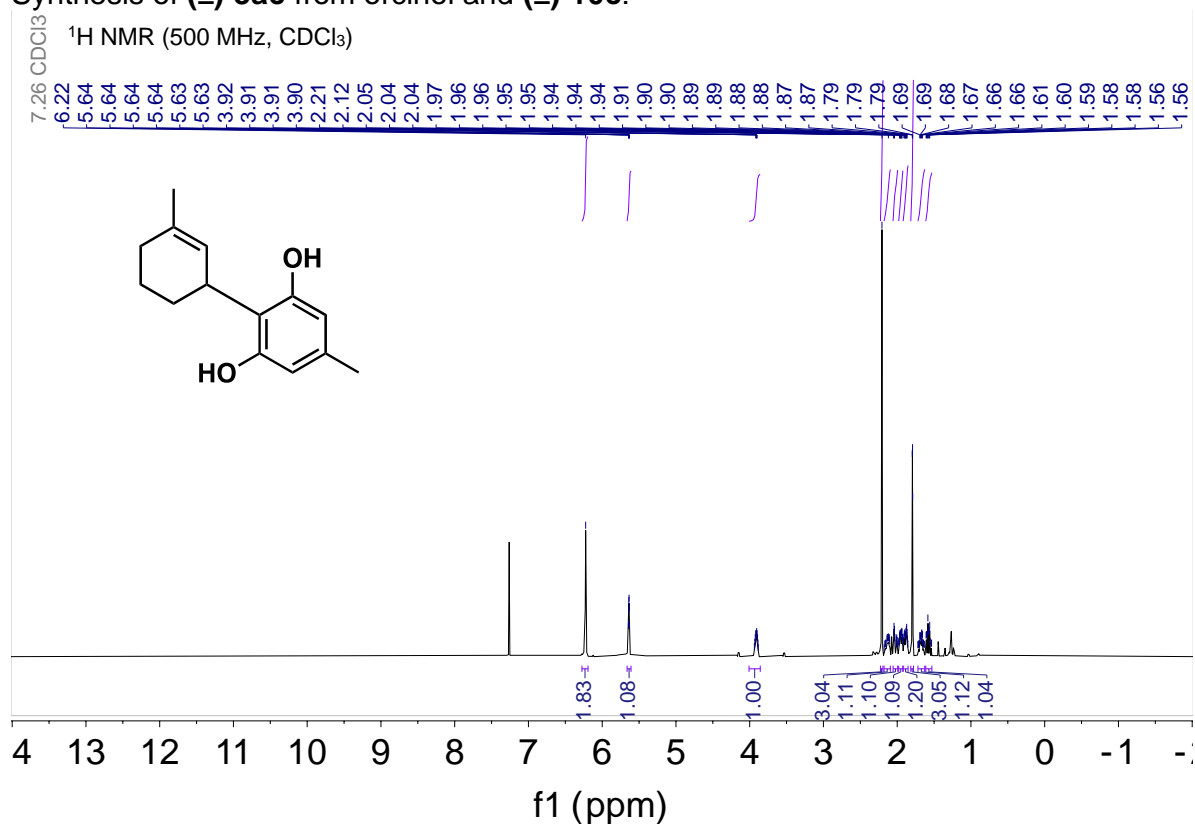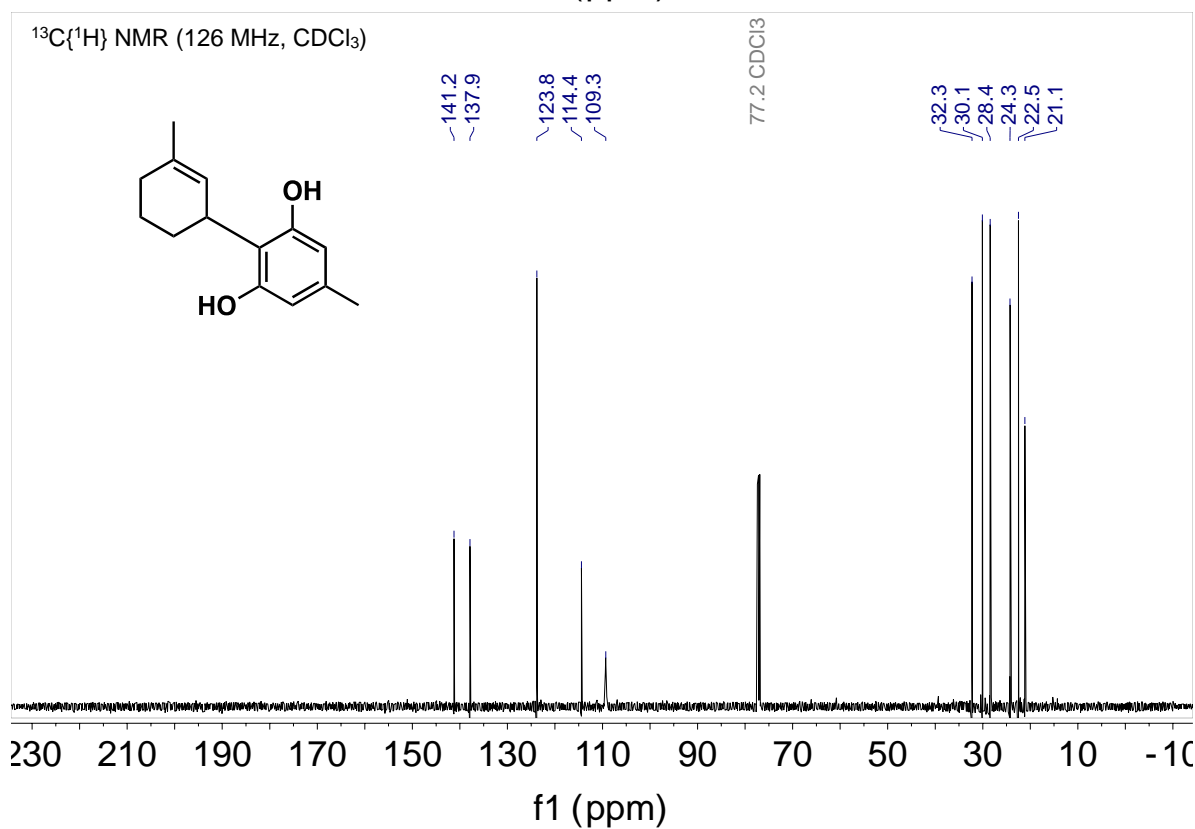

Synthesis of ( $\pm$ )-6ac from orcinol and ( $\pm$ )-10c:

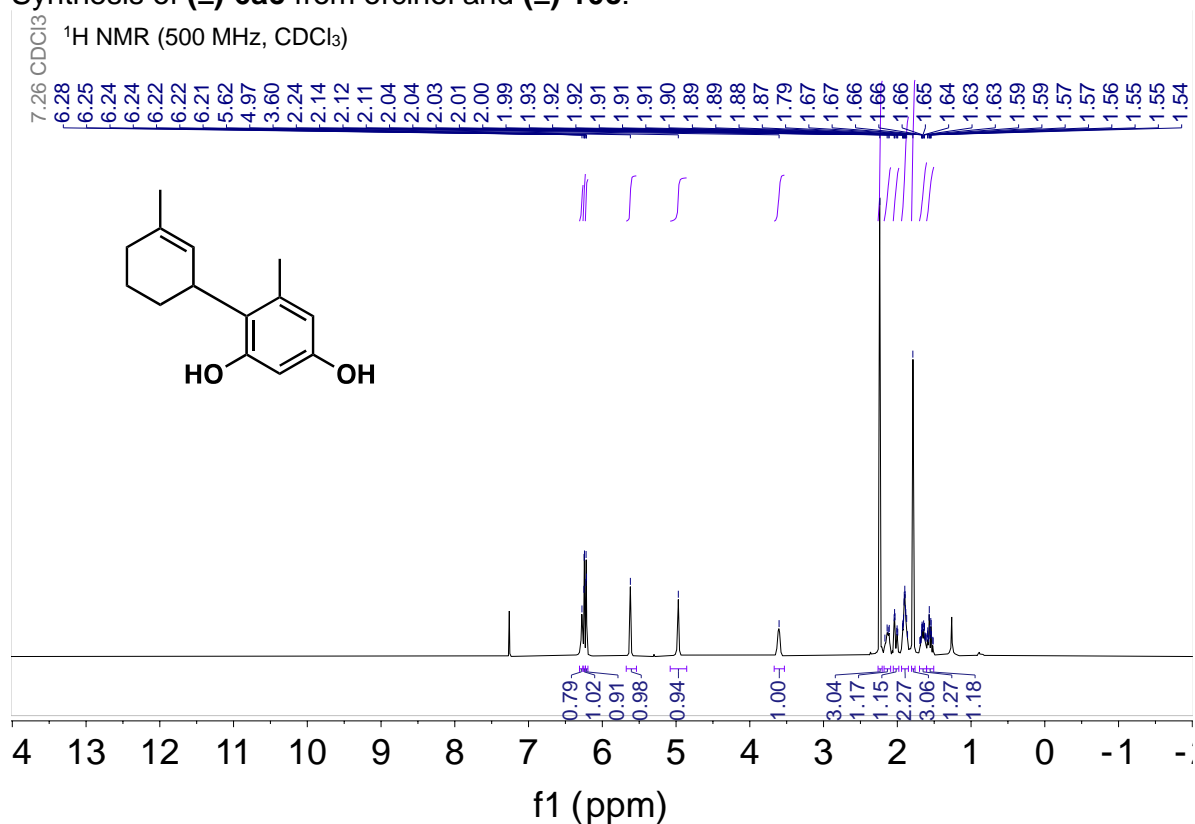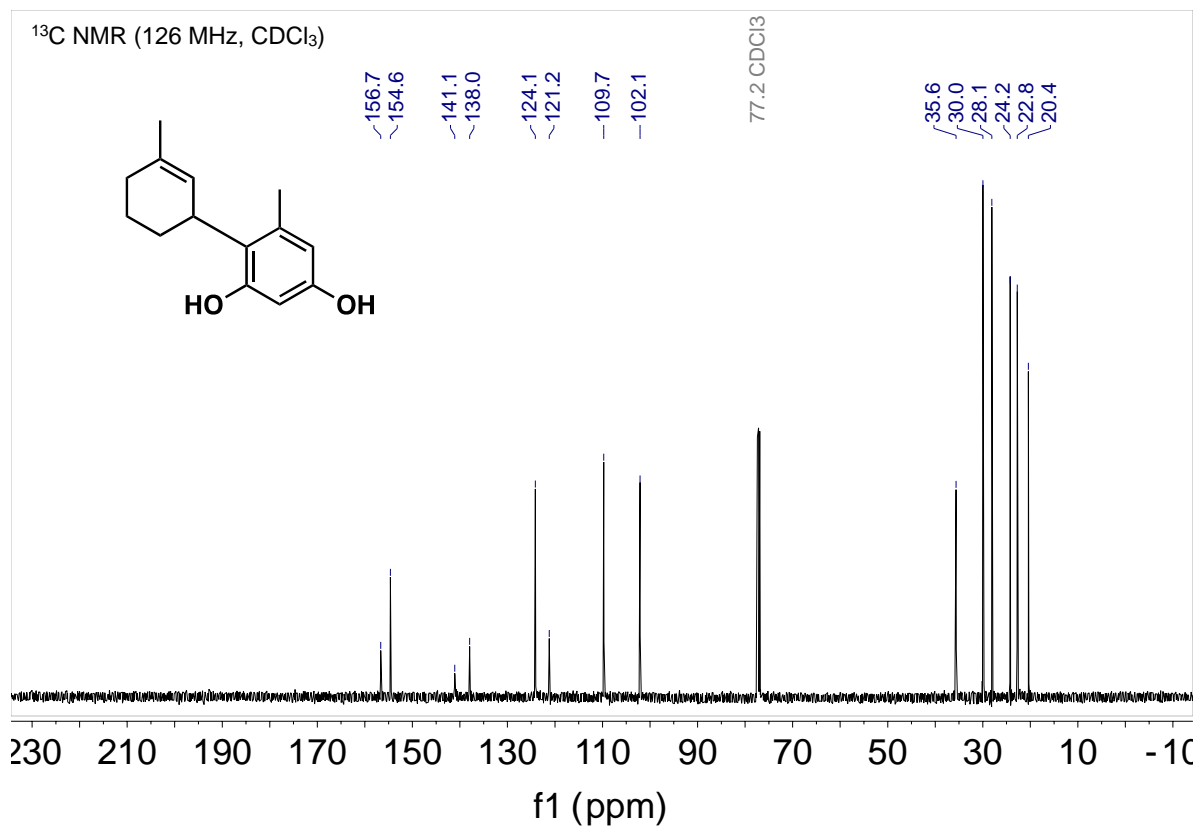



Synthesis of ( $\pm$ )-3ad from orcinol and ( $\pm$ )-10d:

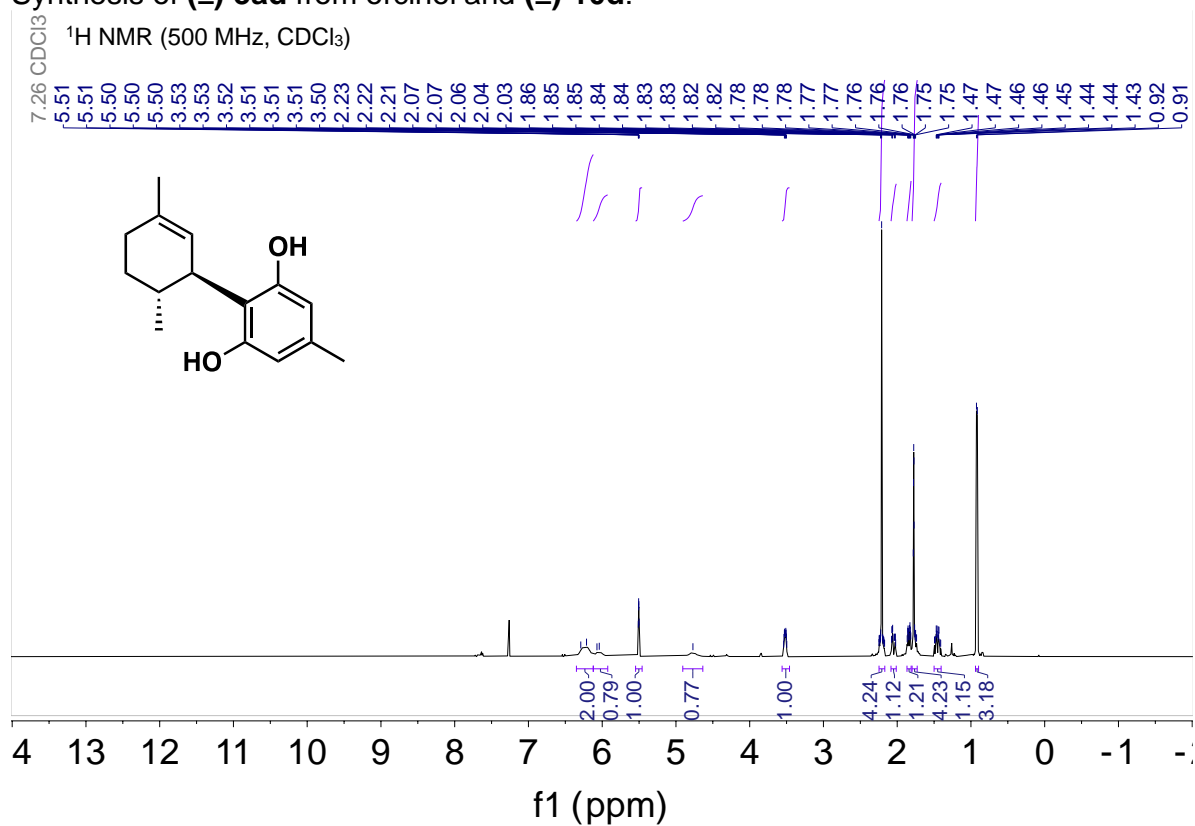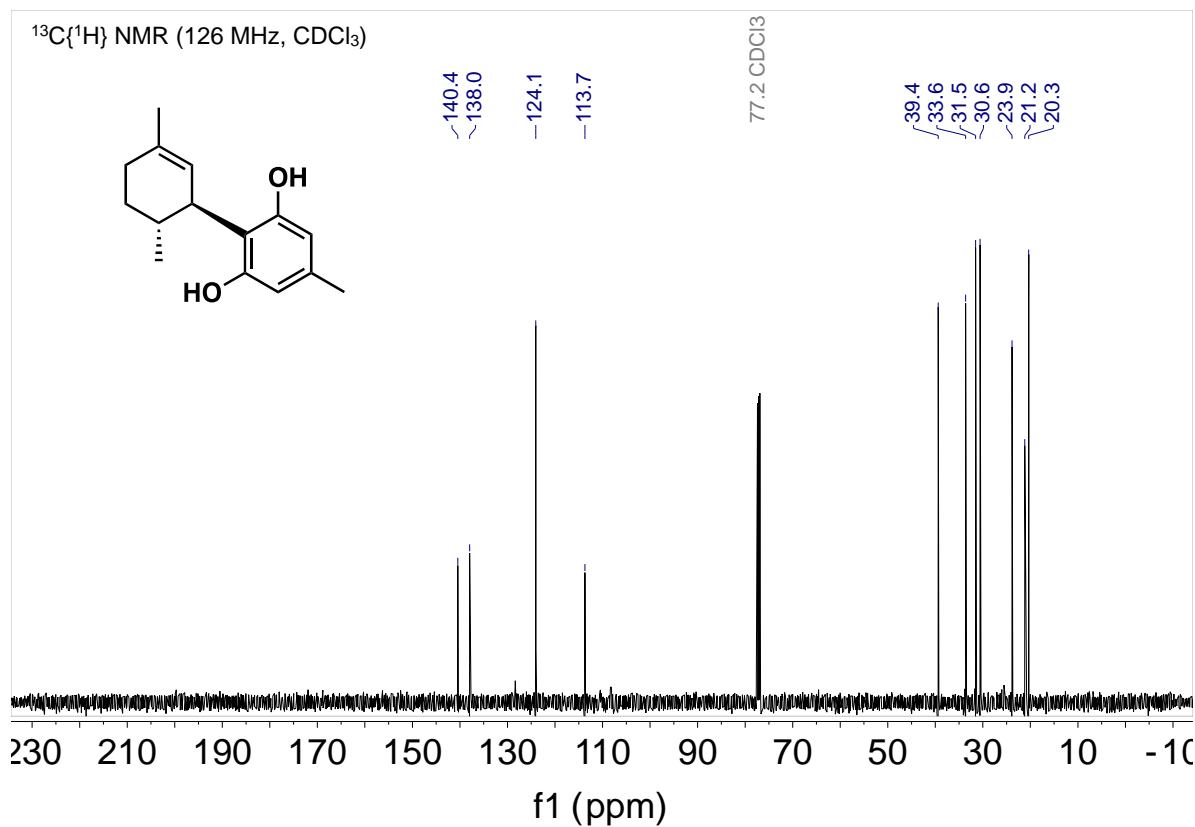

Synthesis of ( $\pm$ )-6ad from orcinol and ( $\pm$ )-10d:

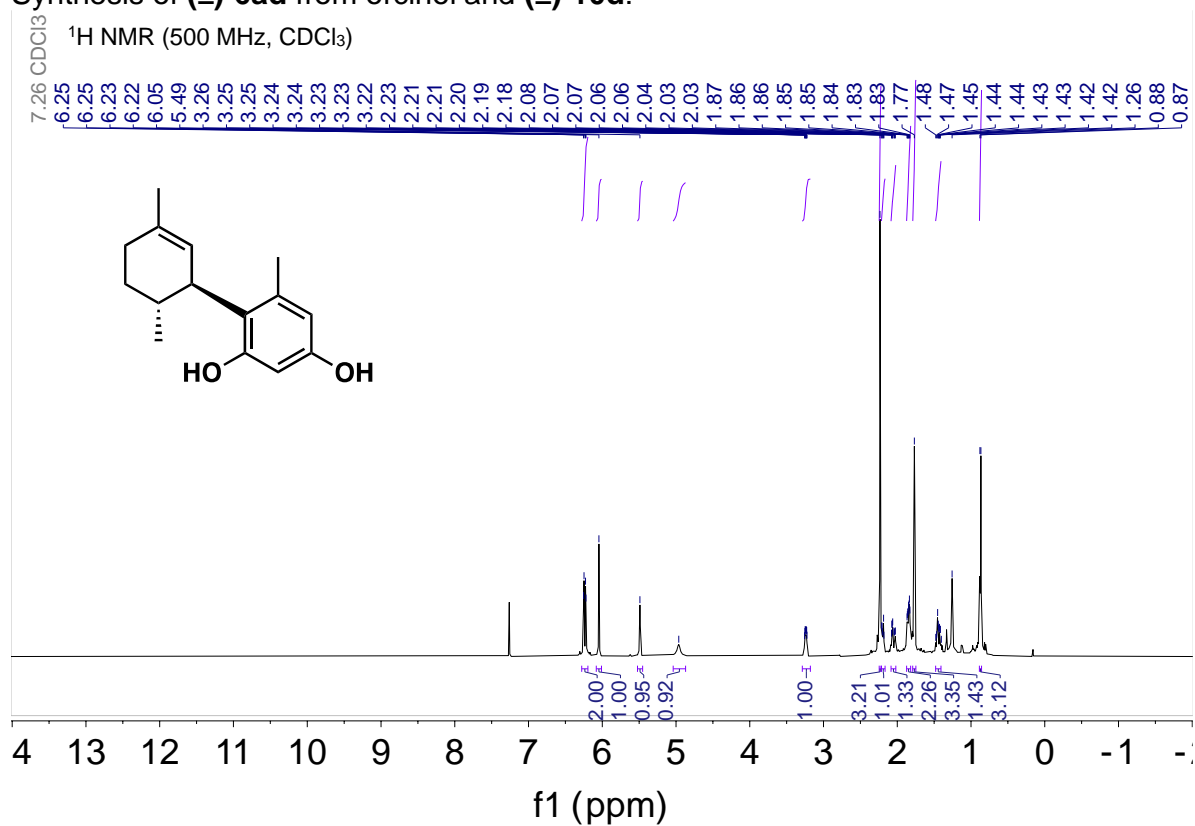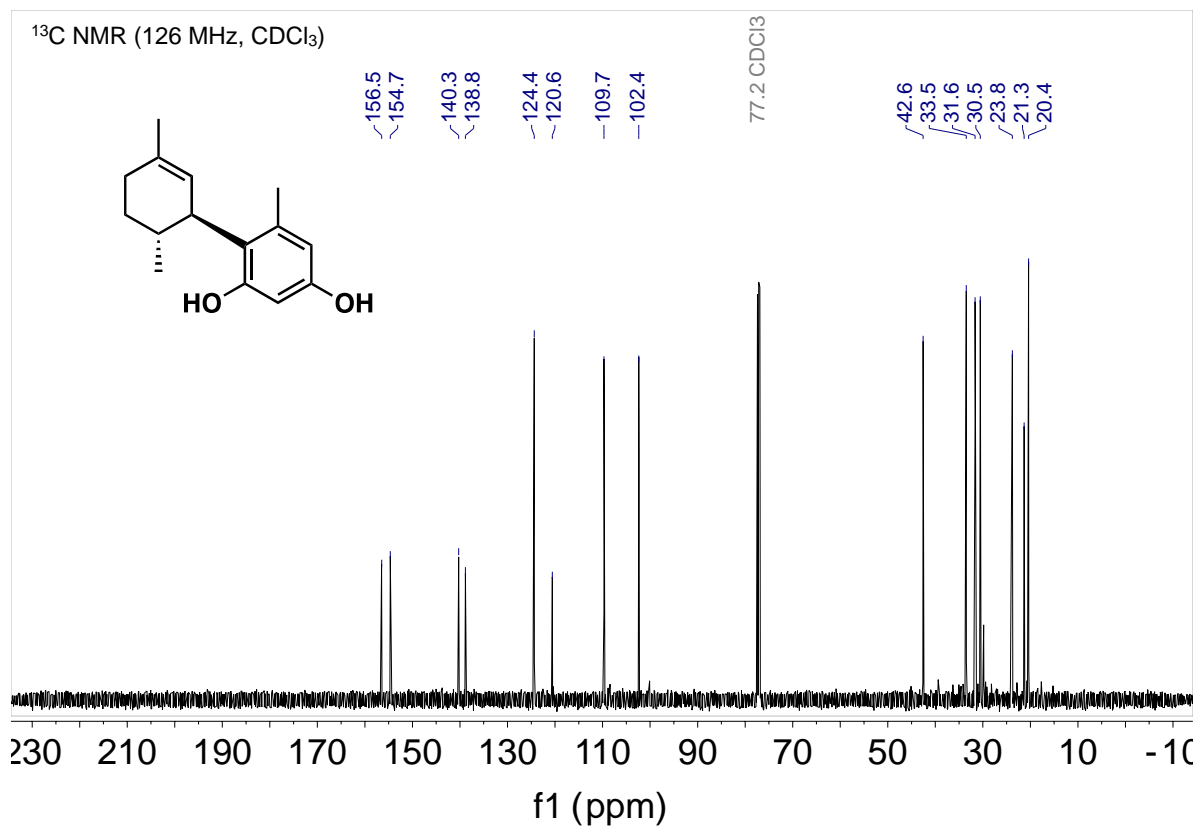

Synthesis of ( $\pm$ )-**3ae** from orcinol and ( $\pm$ )-**10e**:

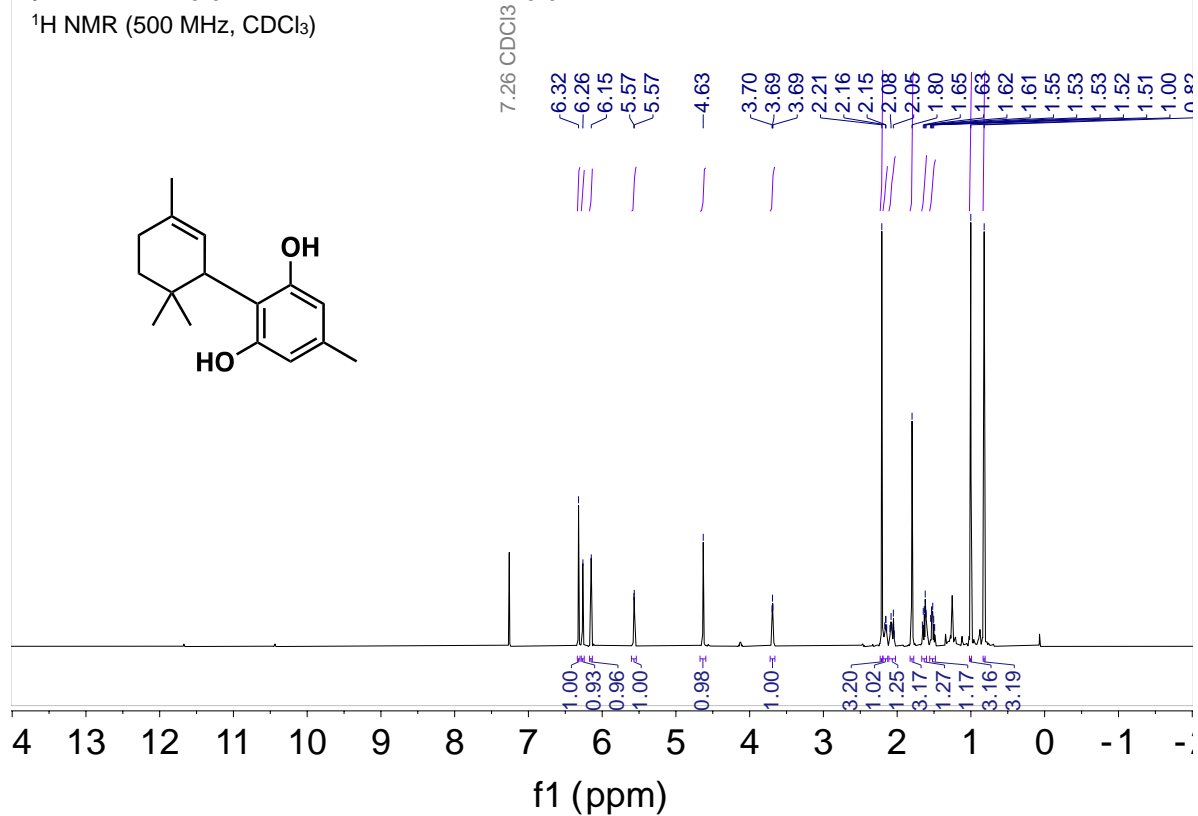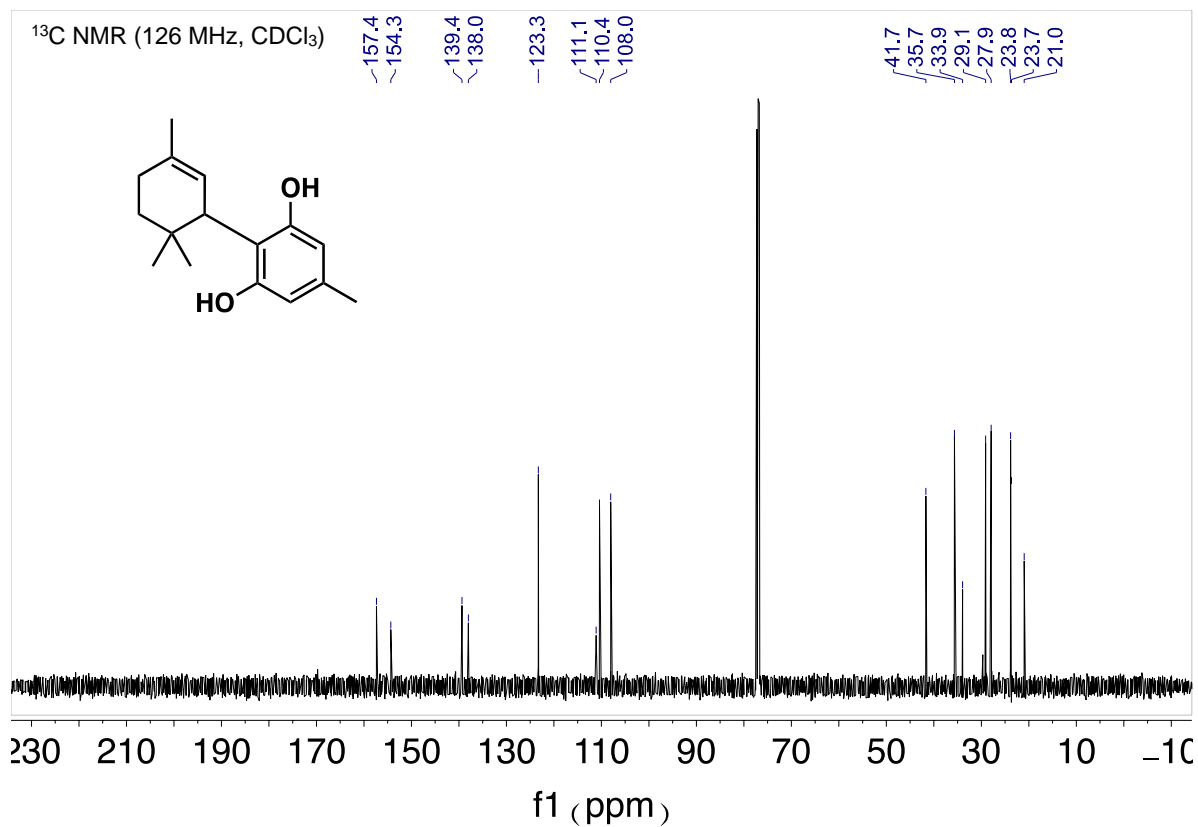

Synthesis of ( $\pm$ )-**6ae** from orcinol and ( $\pm$ )-**10e**:

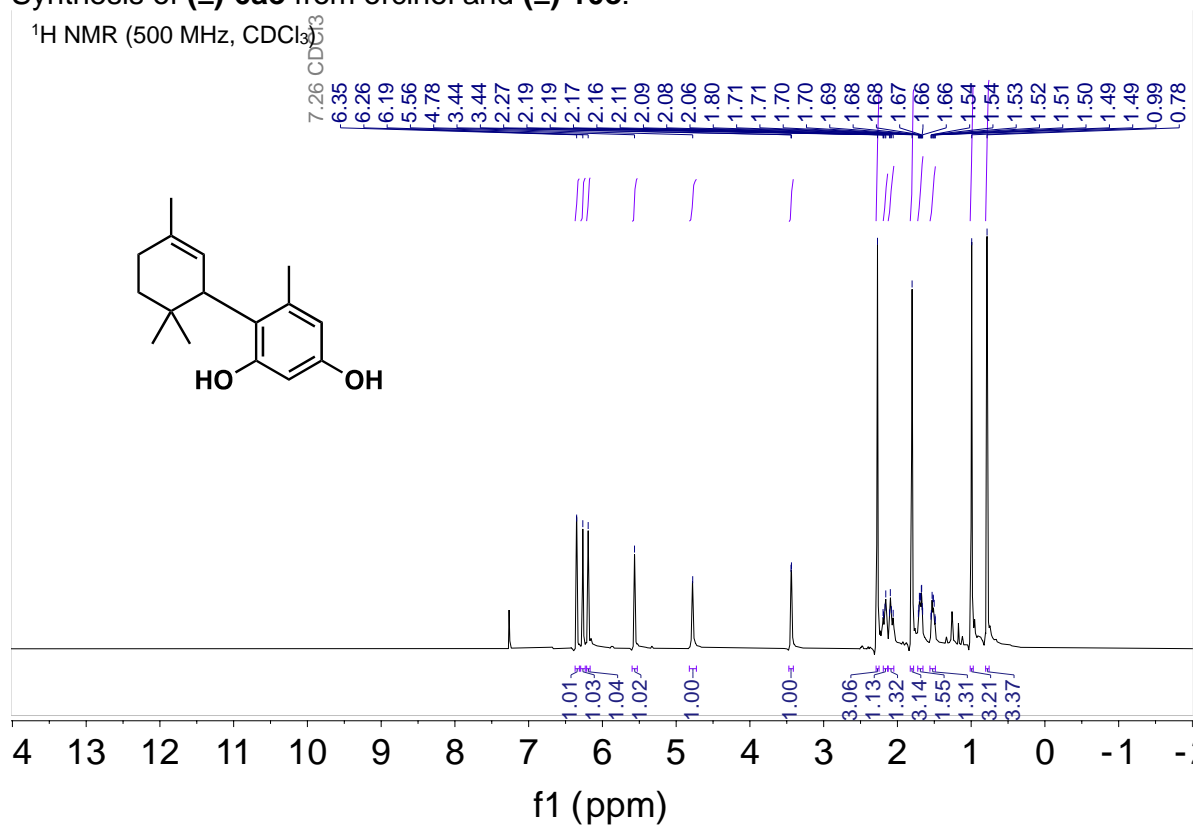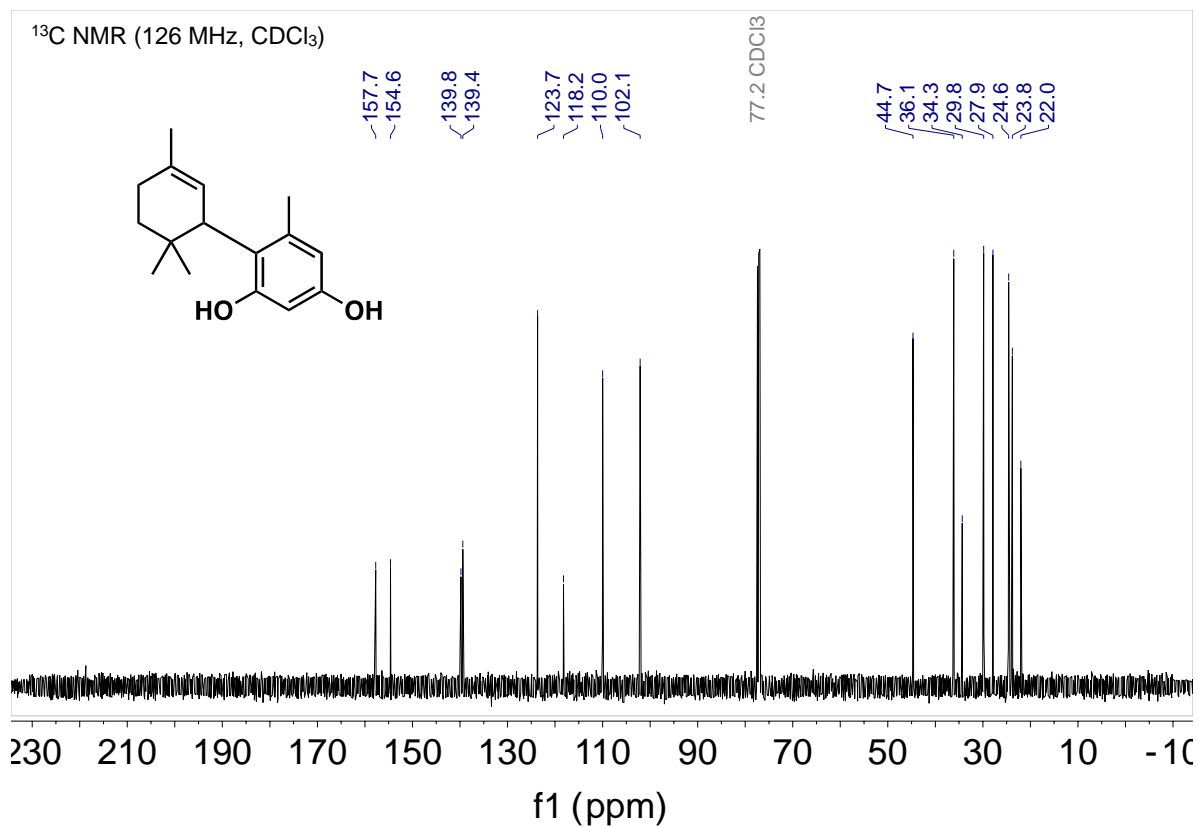

Synthesis of ( $\pm$ )-**3a** from orcinol and ( $\pm$ )-**10**:

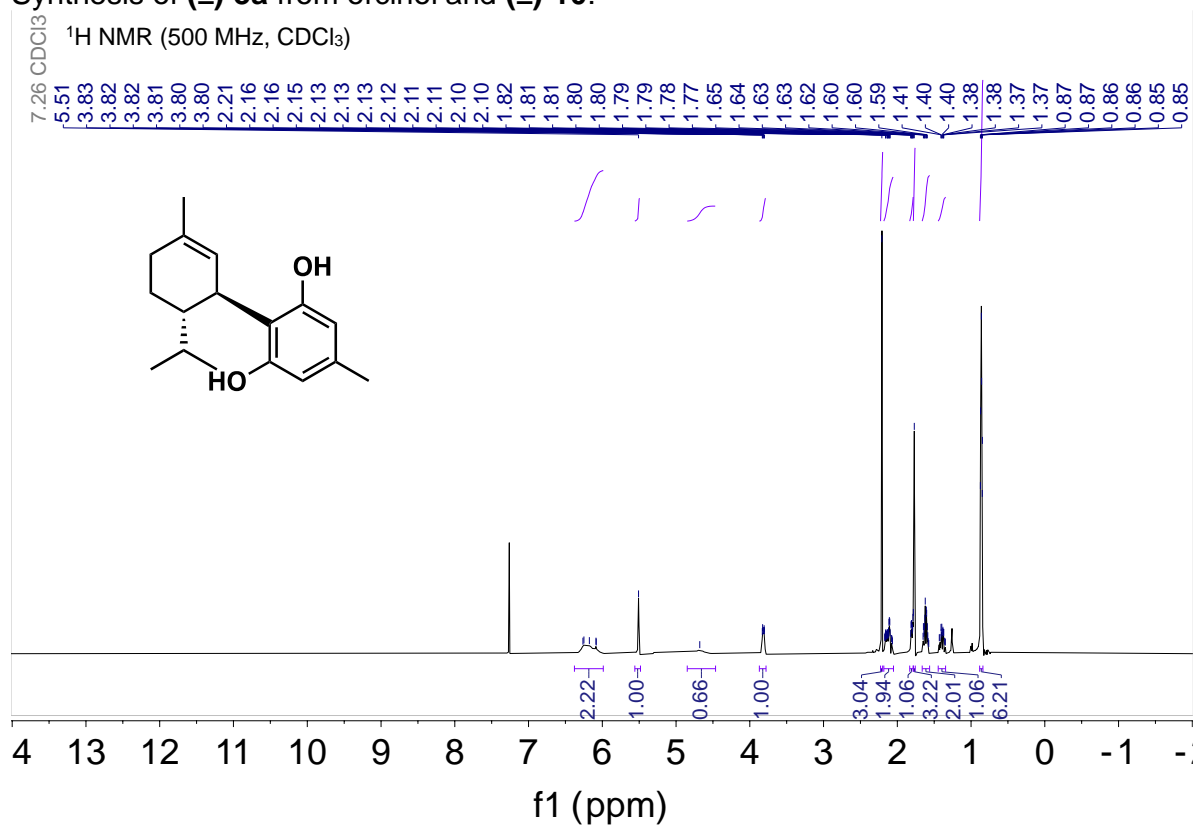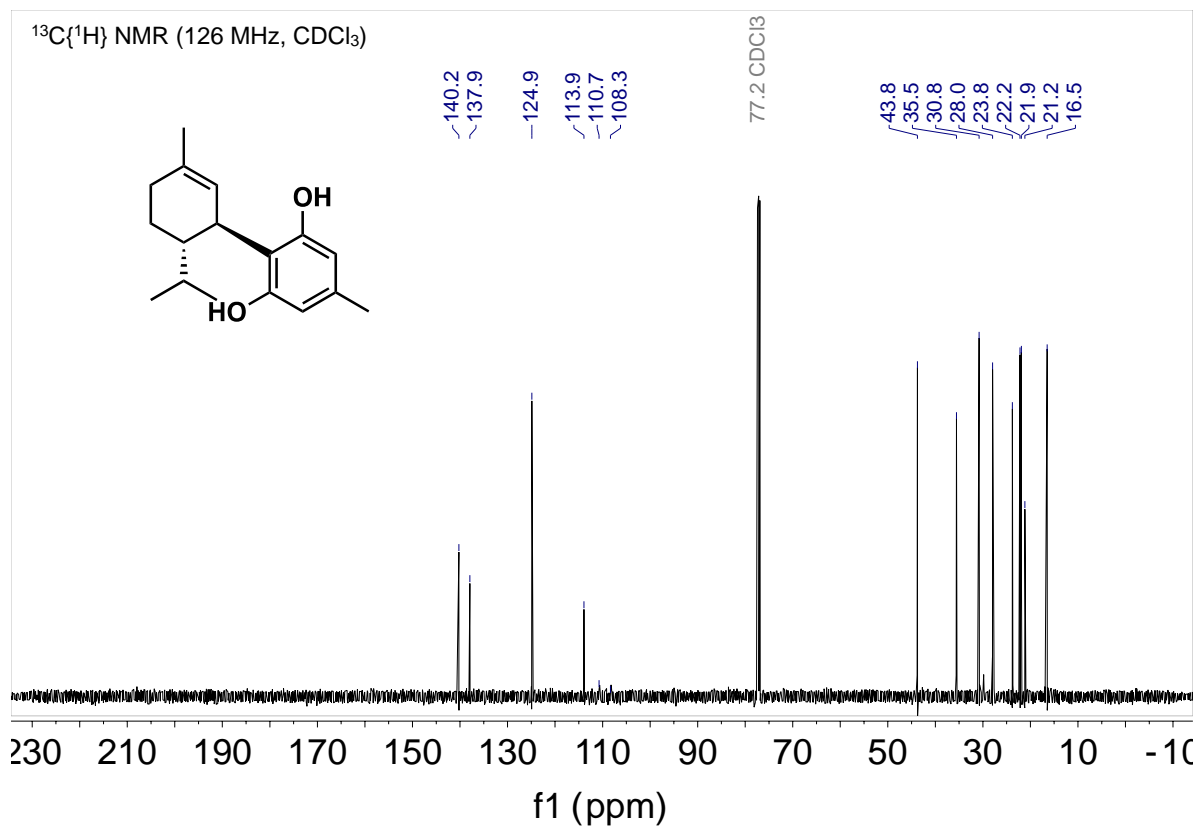

Synthesis of ( $\pm$ )-6a from orcinol and ( $\pm$ )-10:

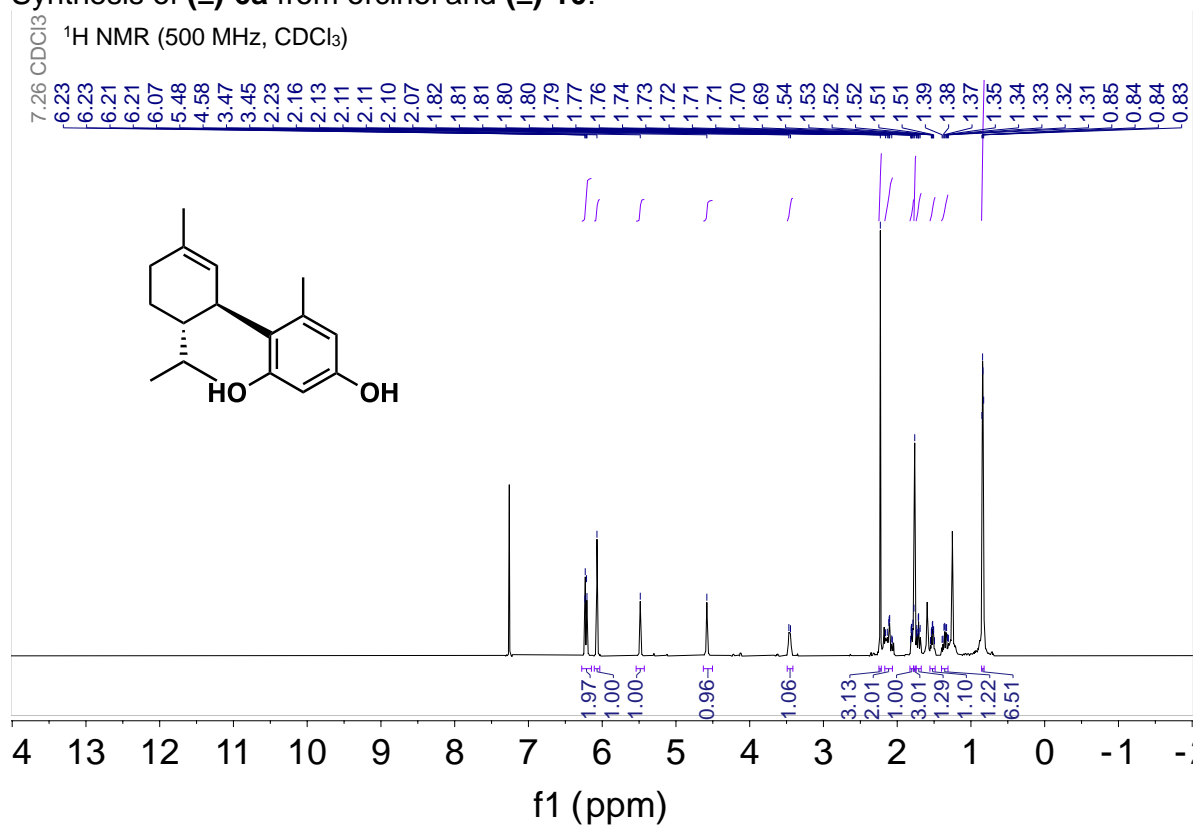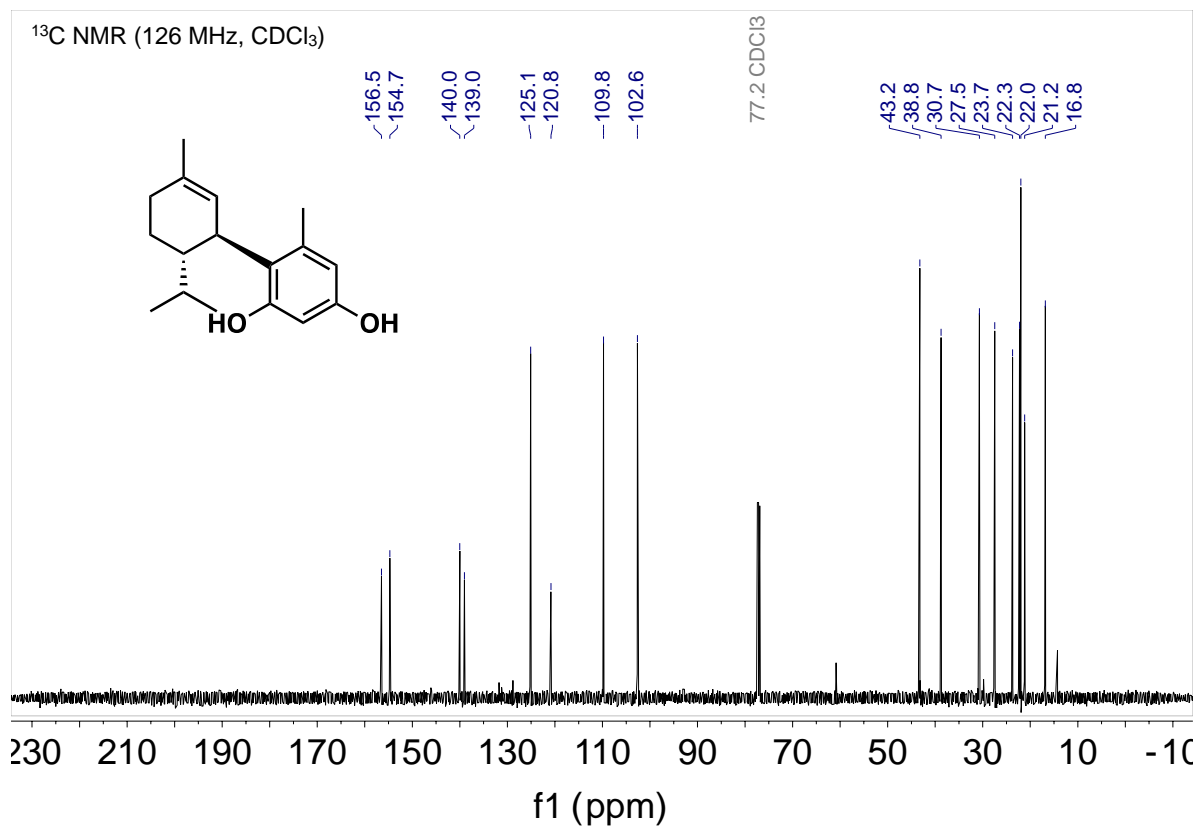

Synthesis of ( $\pm$ )-**3af** from orcinol and ( $\pm$ )-**10f**:

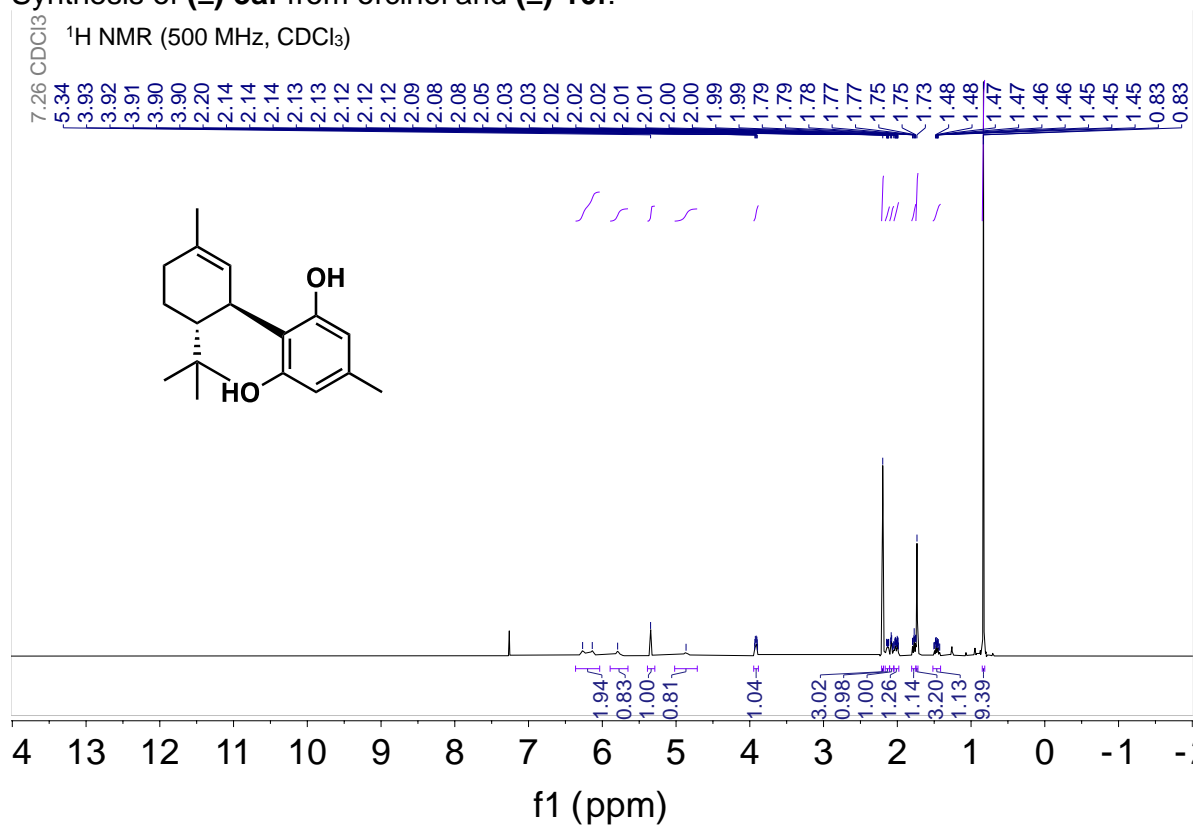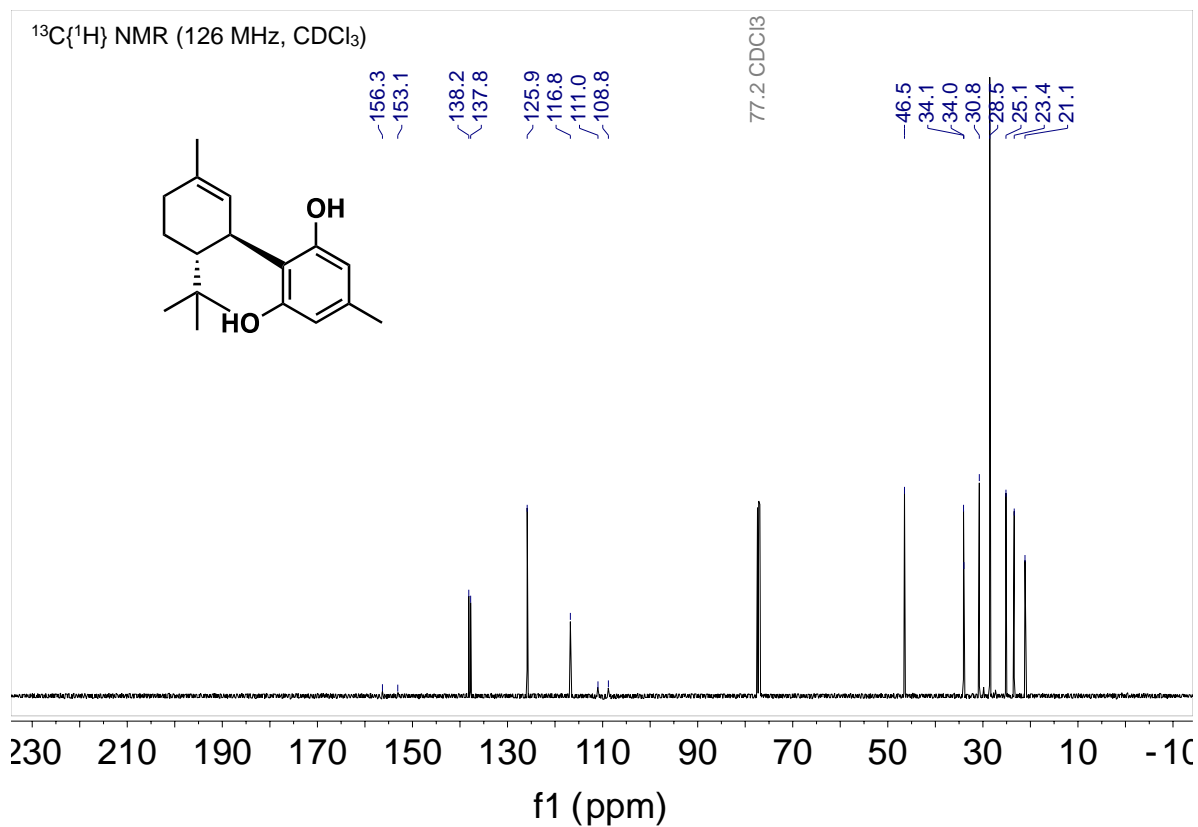

Synthesis of ( $\pm$ )-19a from orcinol and ( $\pm$ )-17:

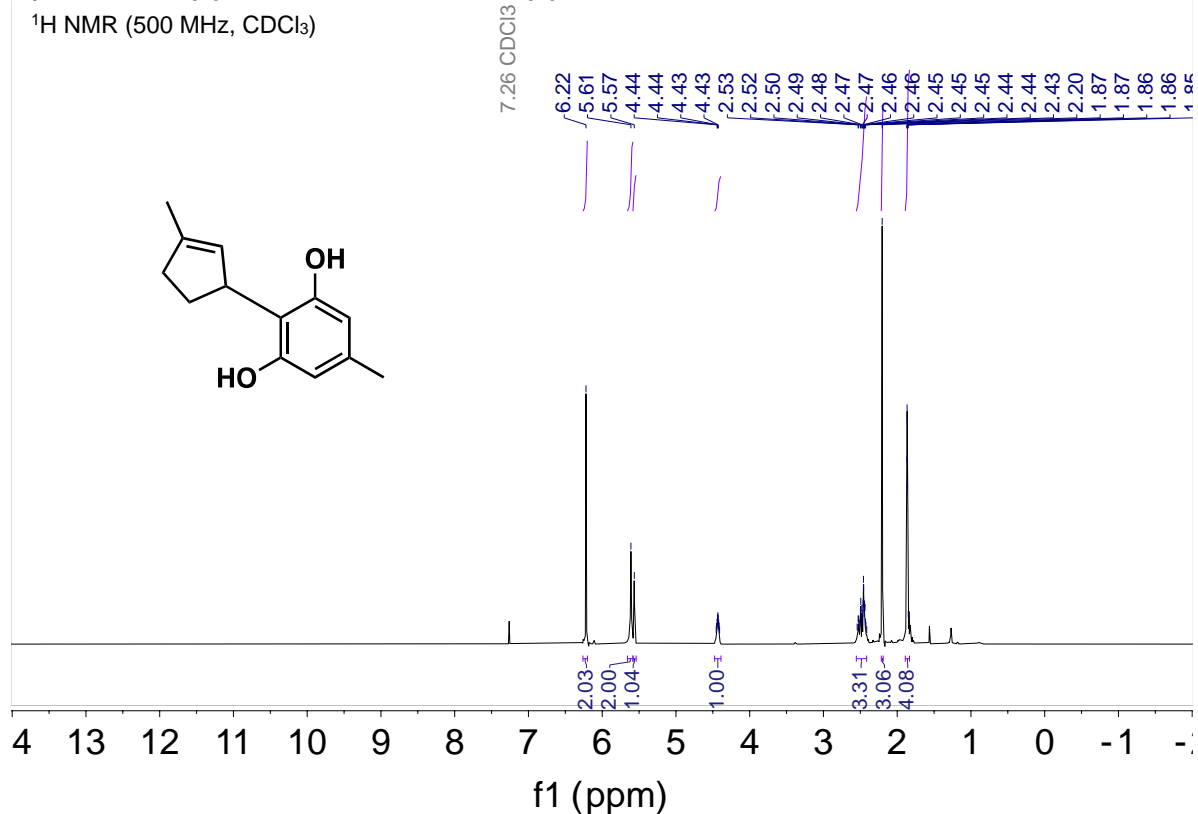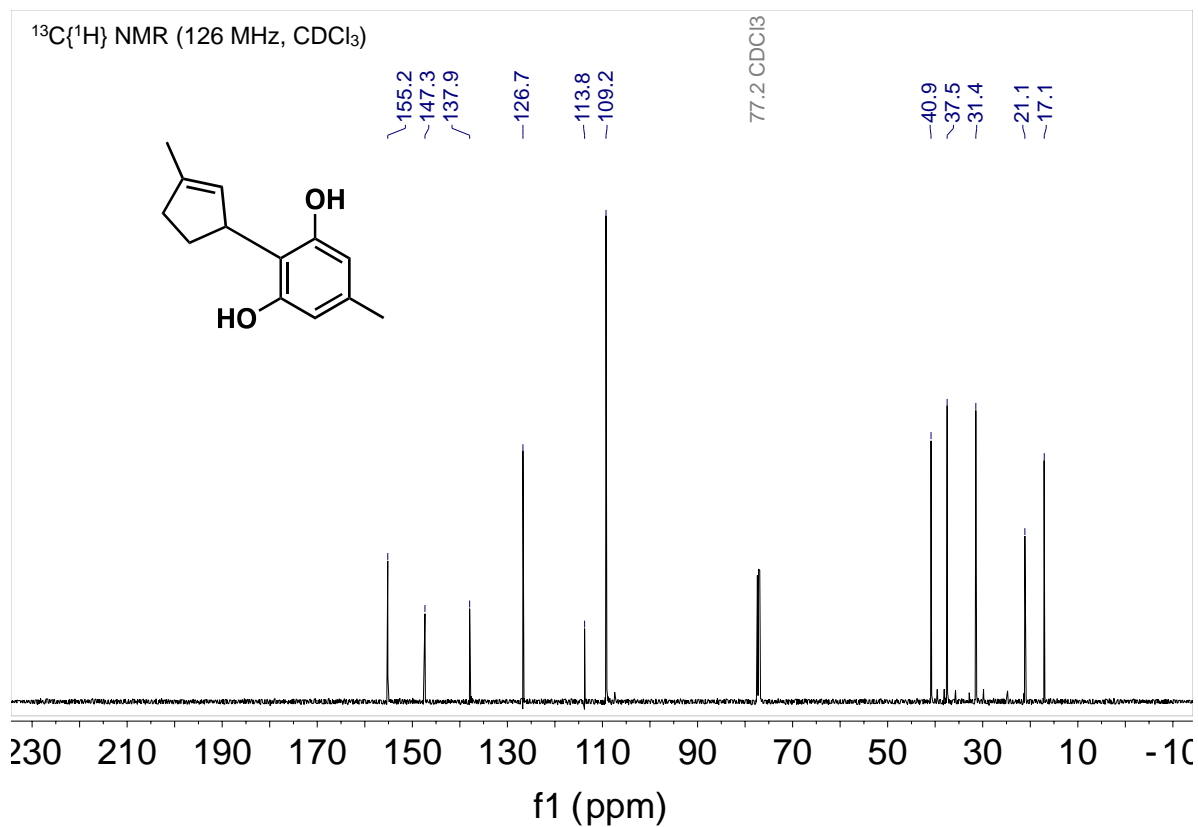



Synthesis of ( $\pm$ )-**18a** from orcinol and ( $\pm$ )-**17**:

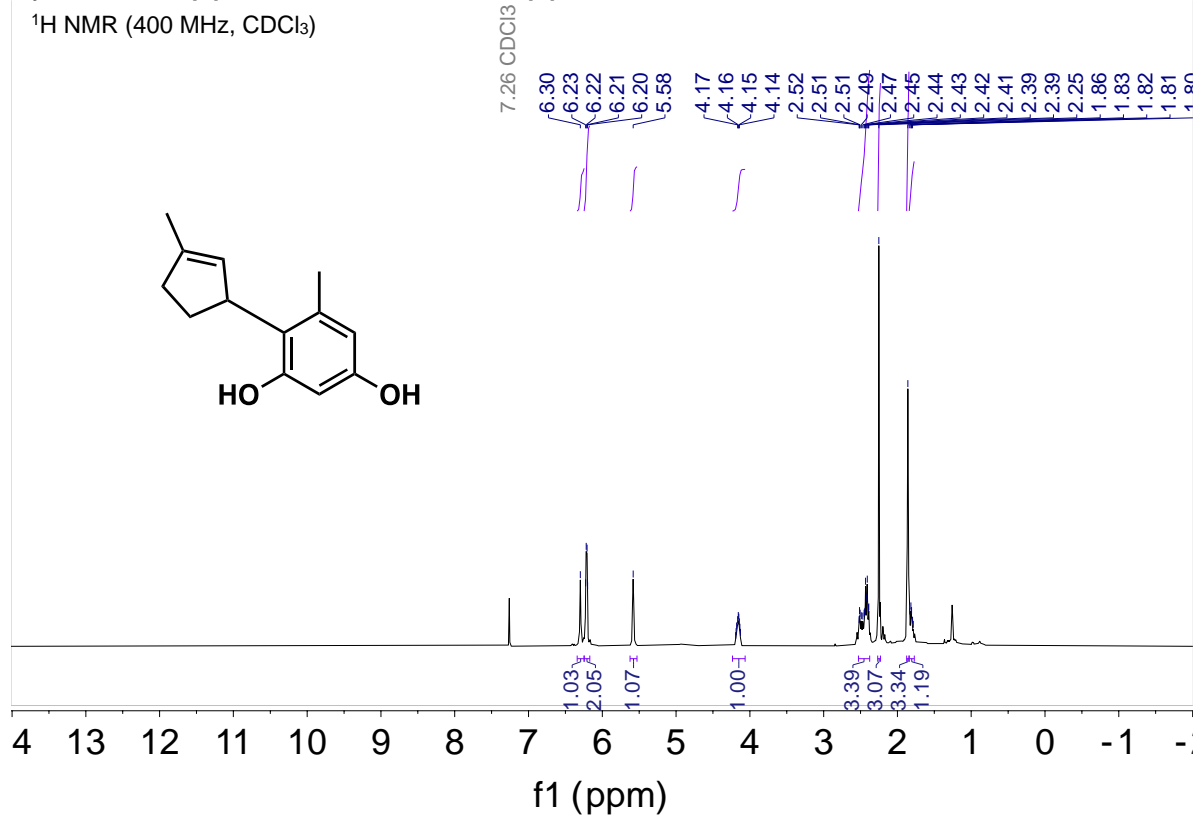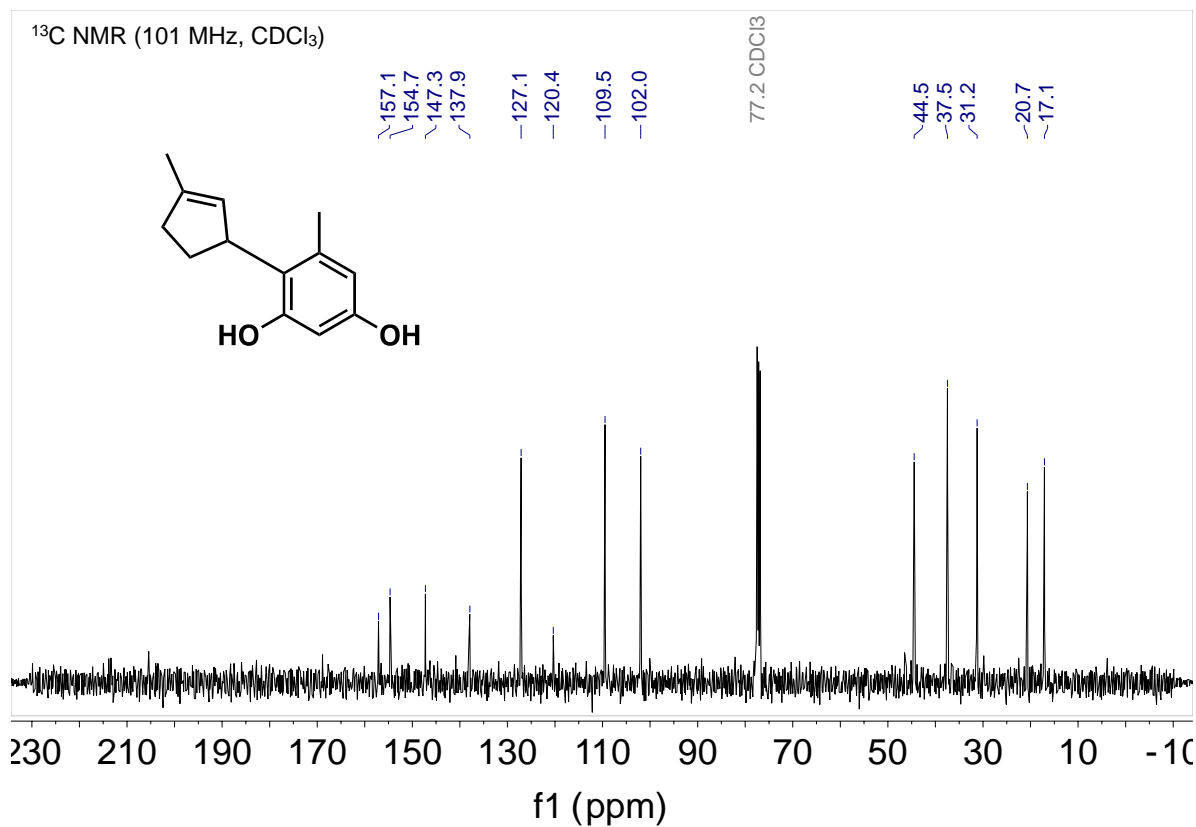

Synthesis of ( $\pm$ )-22a from orcinol and ( $\pm$ )-20:

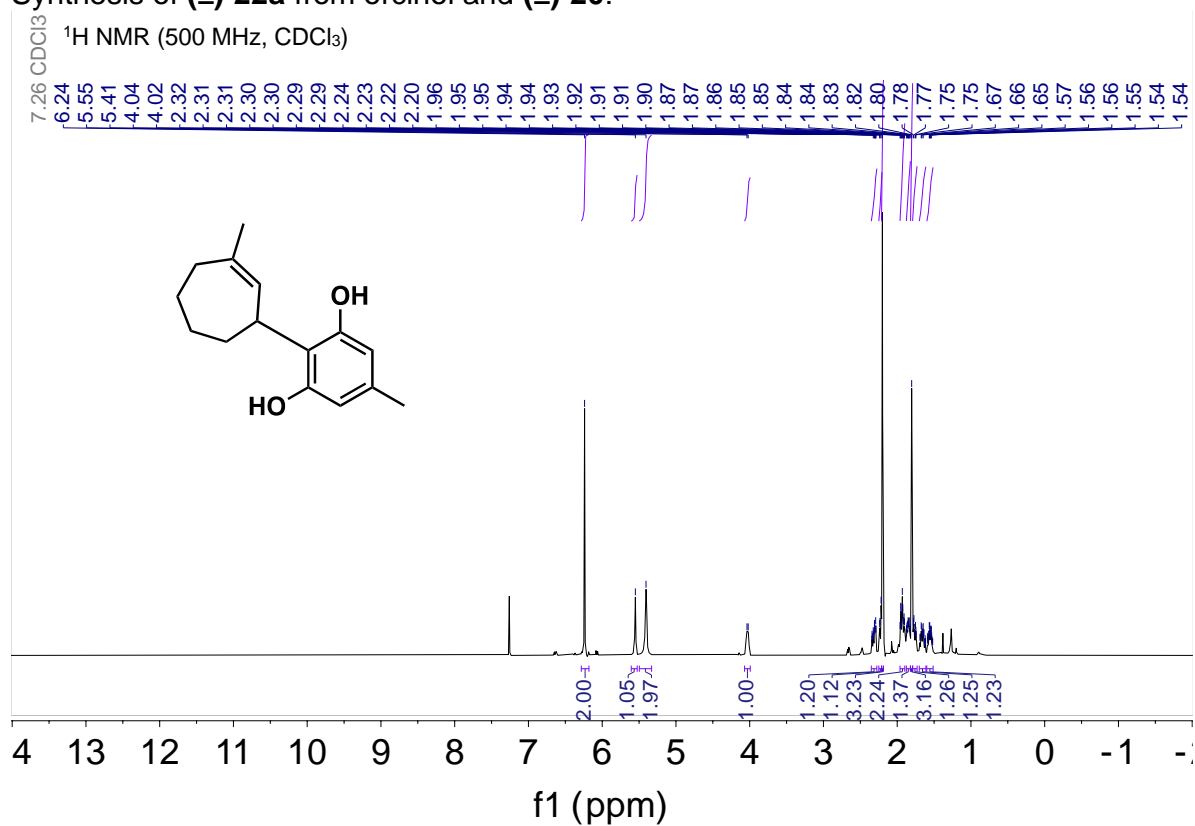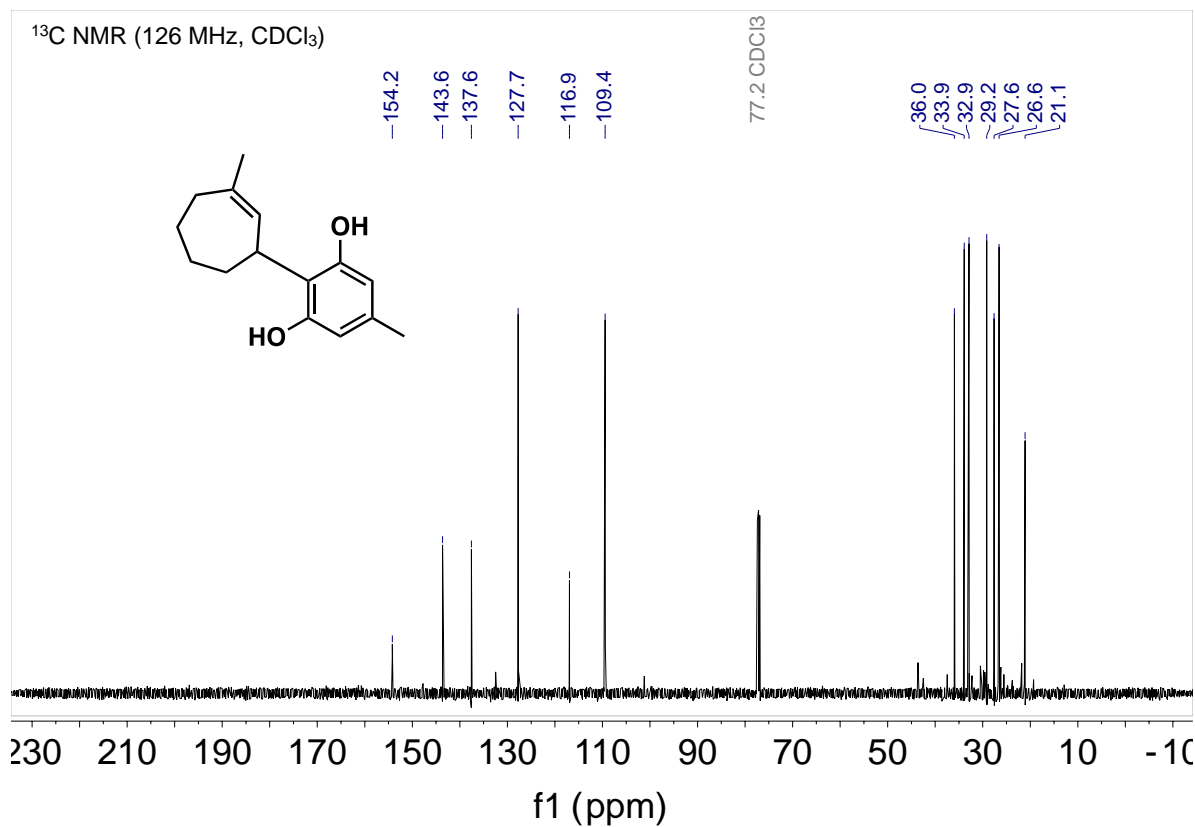

Synthesis of **(±)-21a** from orcinol and **(±)-20**:

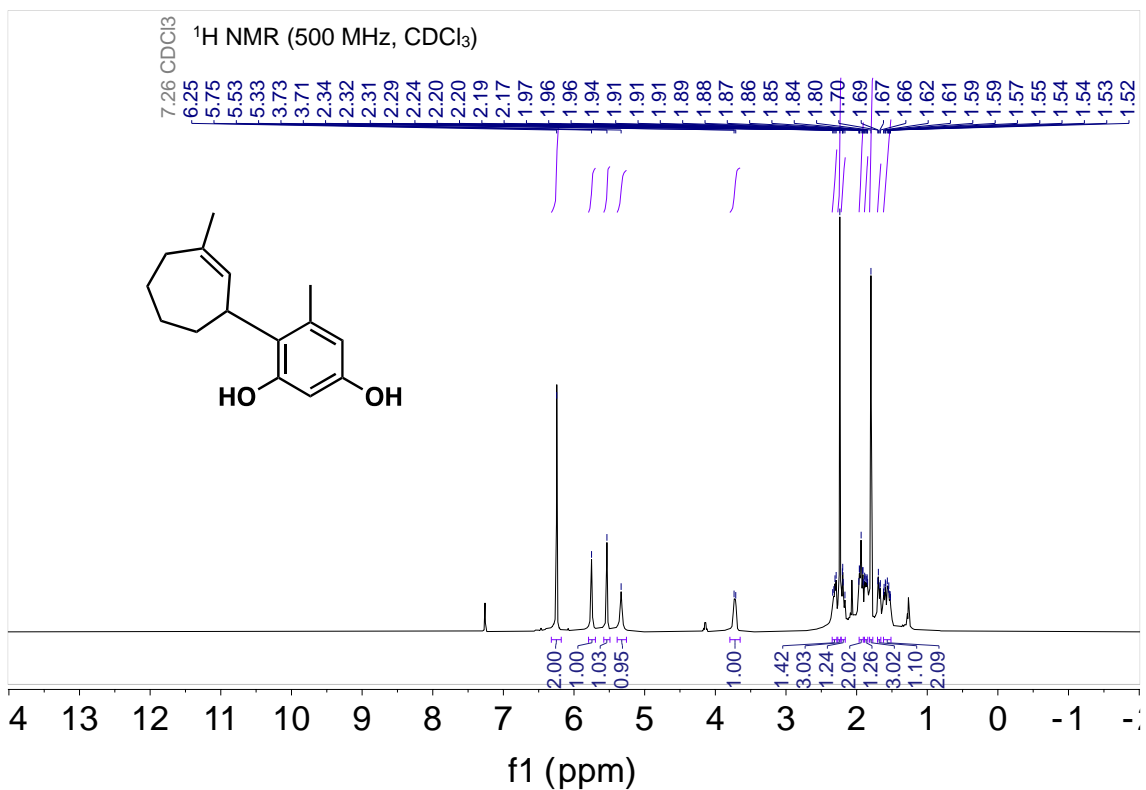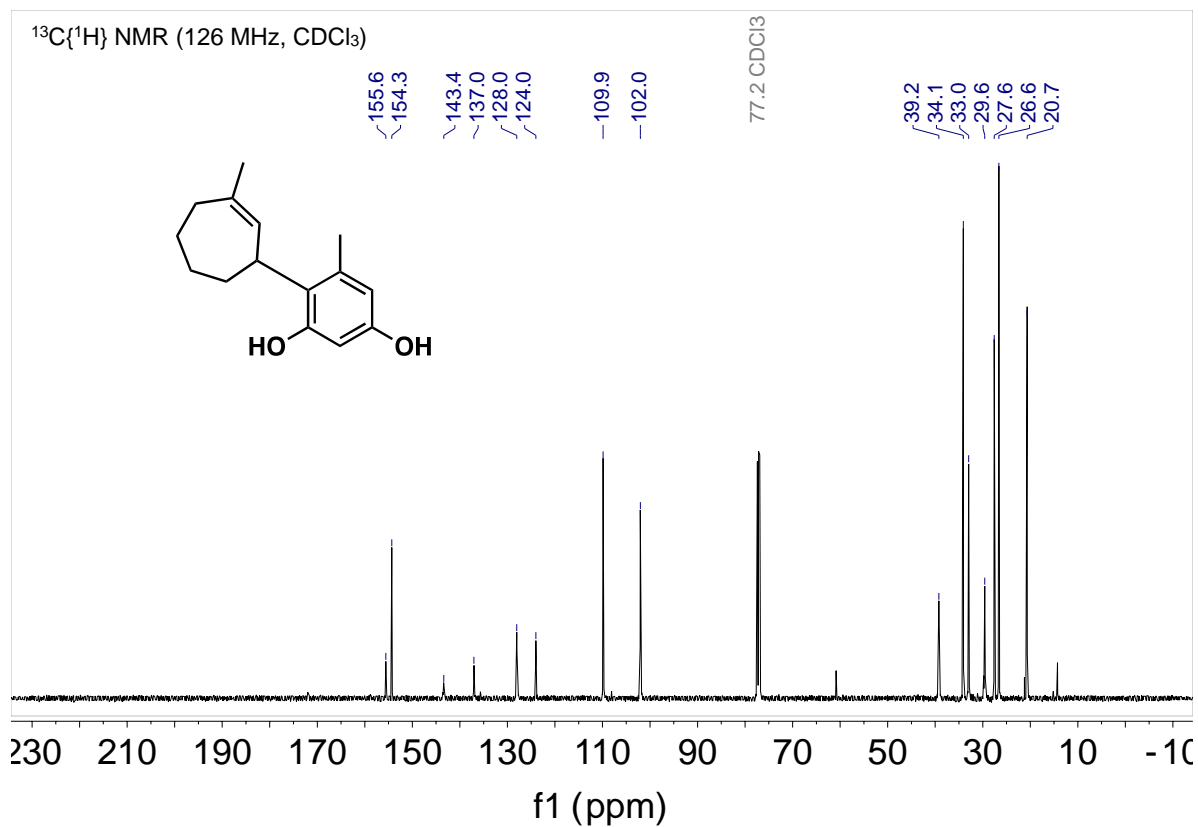

Synthesis of ( $\pm$ )-**3c** from olivetol and ( $\pm$ )-**10c**:

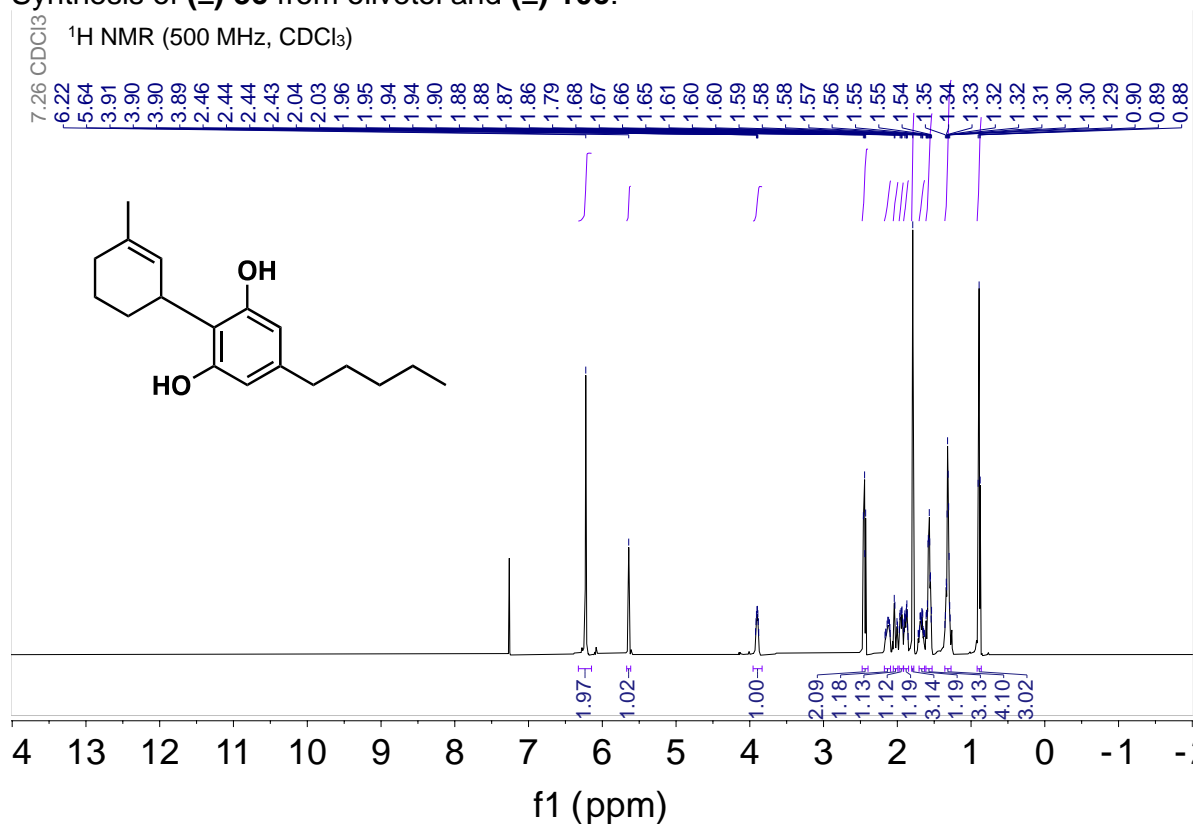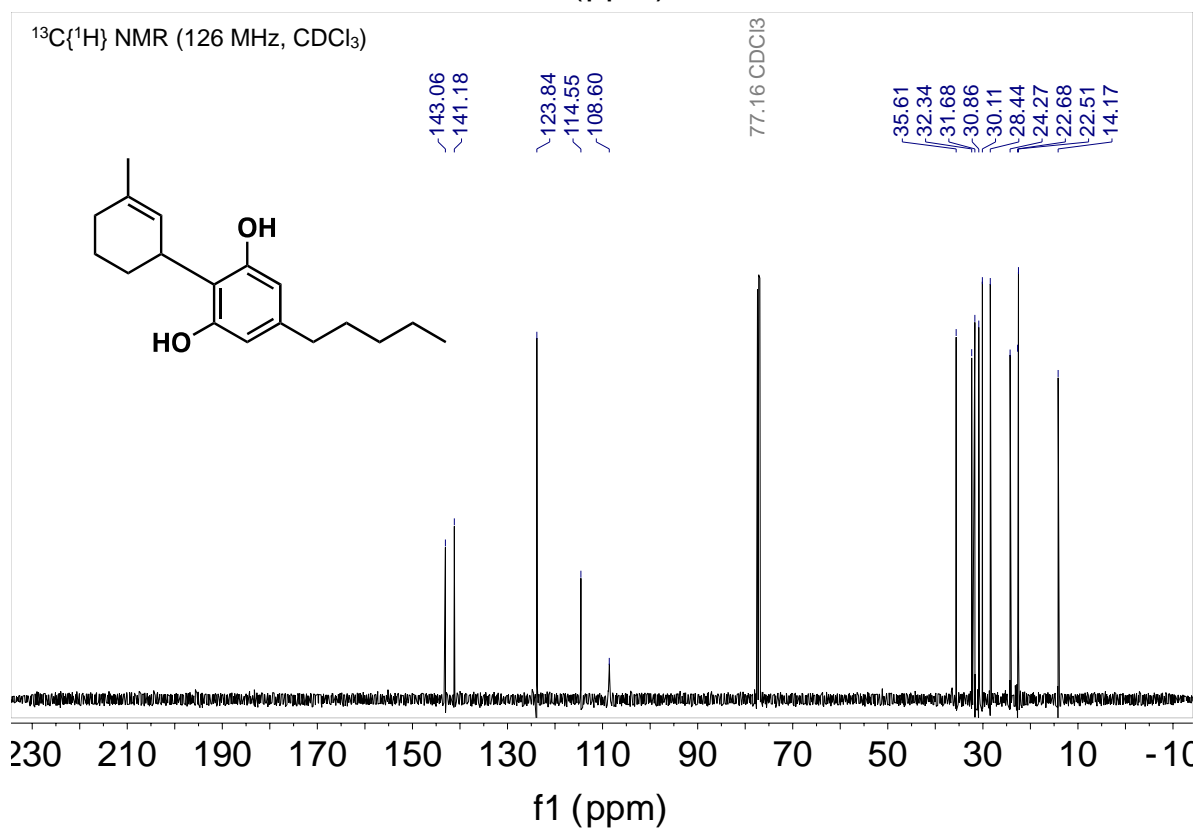

Synthesis of ( $\pm$ )-**6c** from olivetol and ( $\pm$ )-**10c**:

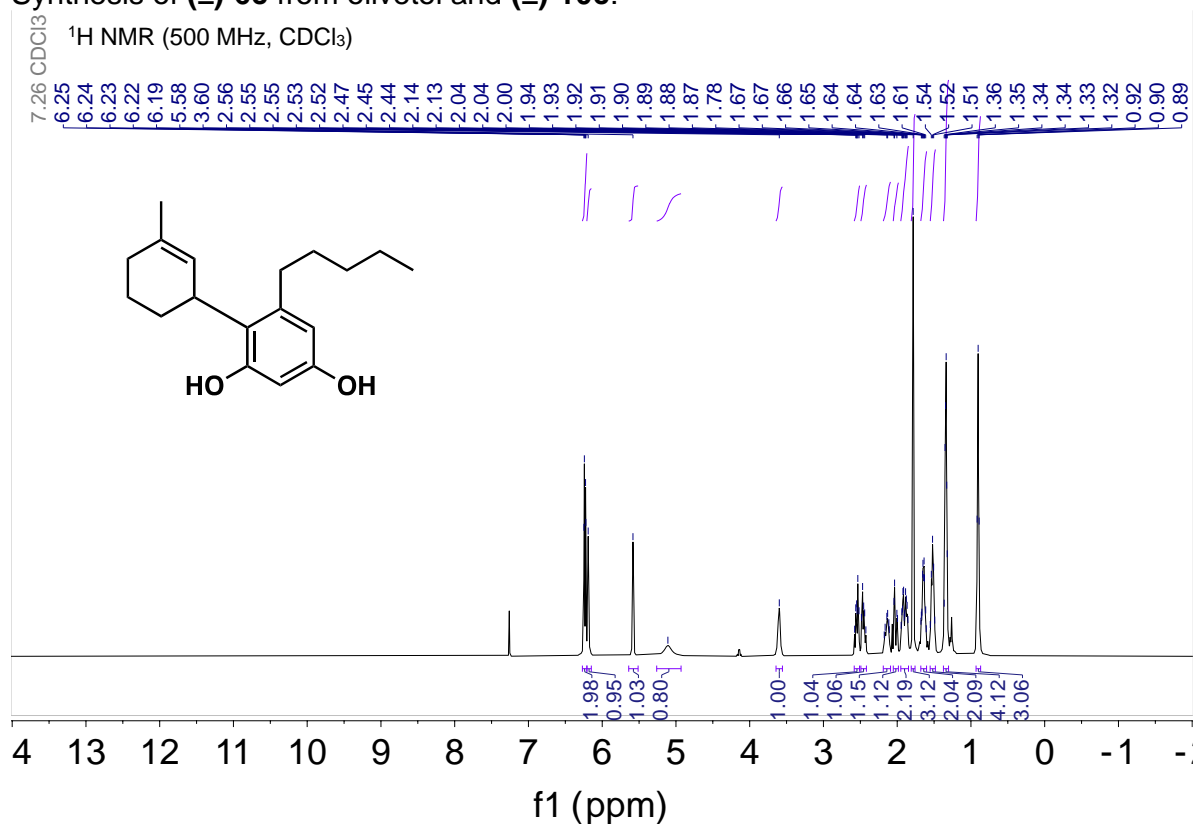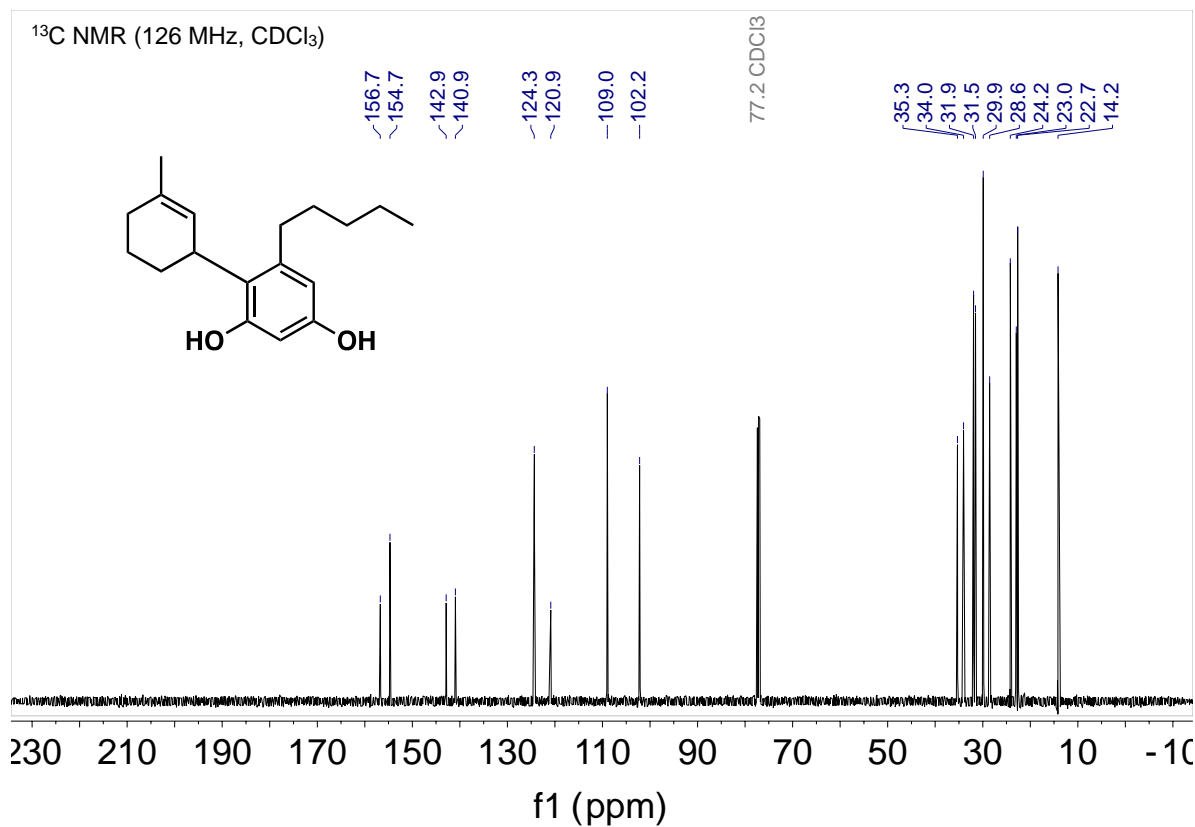

Synthesis of ( $\pm$ )-**3d** from olivetol and ( $\pm$ )-**10d**:

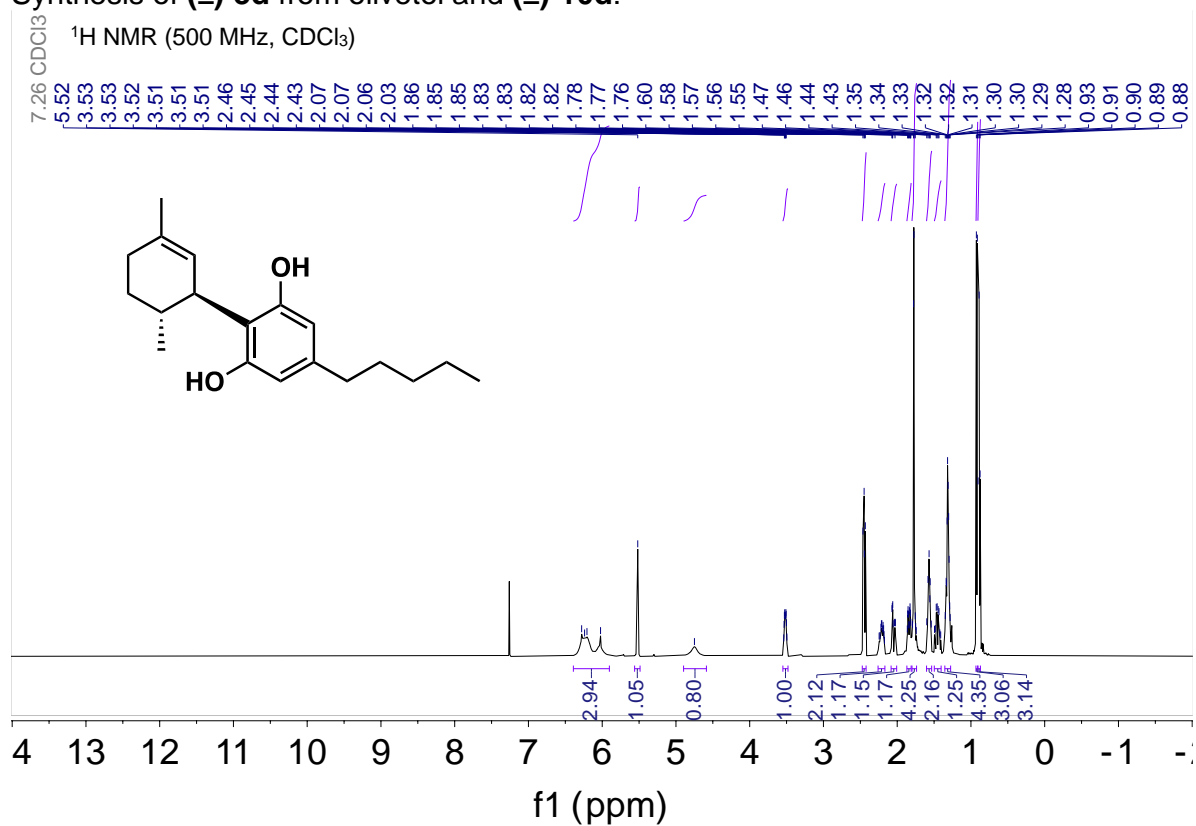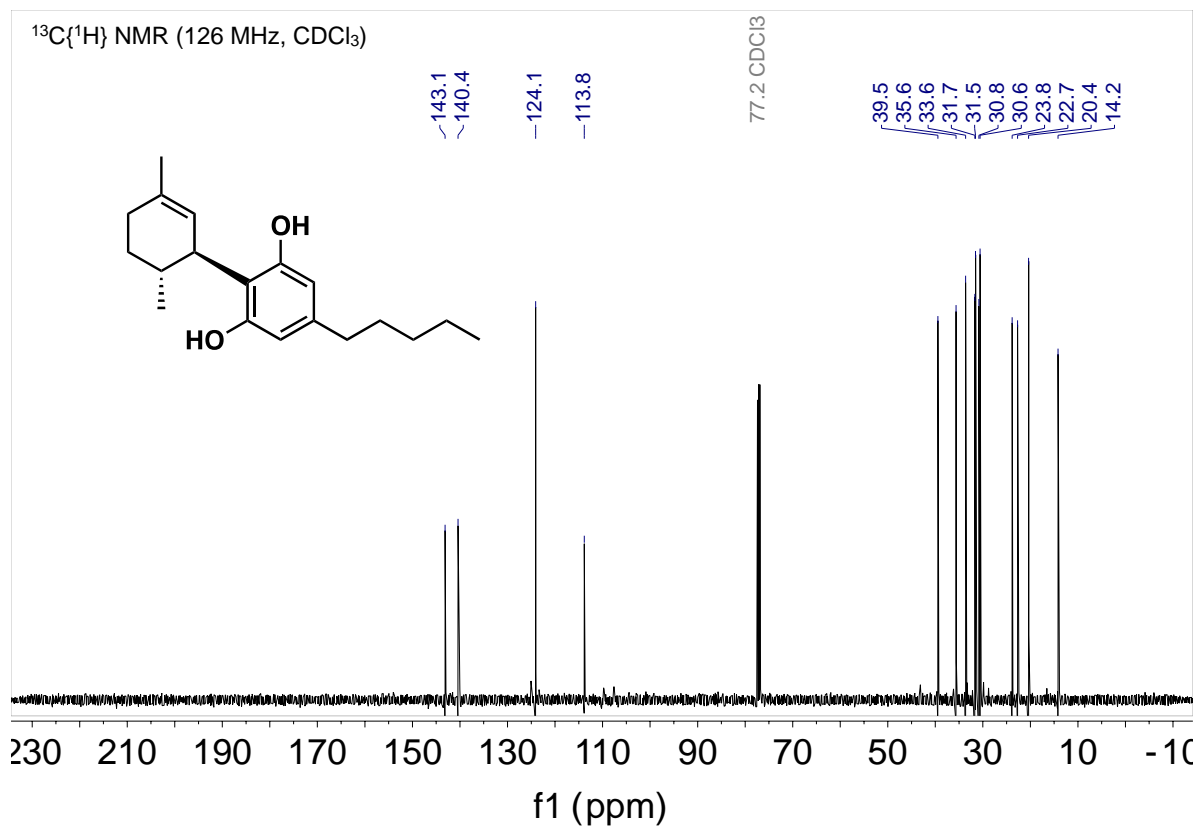

Synthesis of ( $\pm$ )-6d from olivetol and ( $\pm$ )-10d:

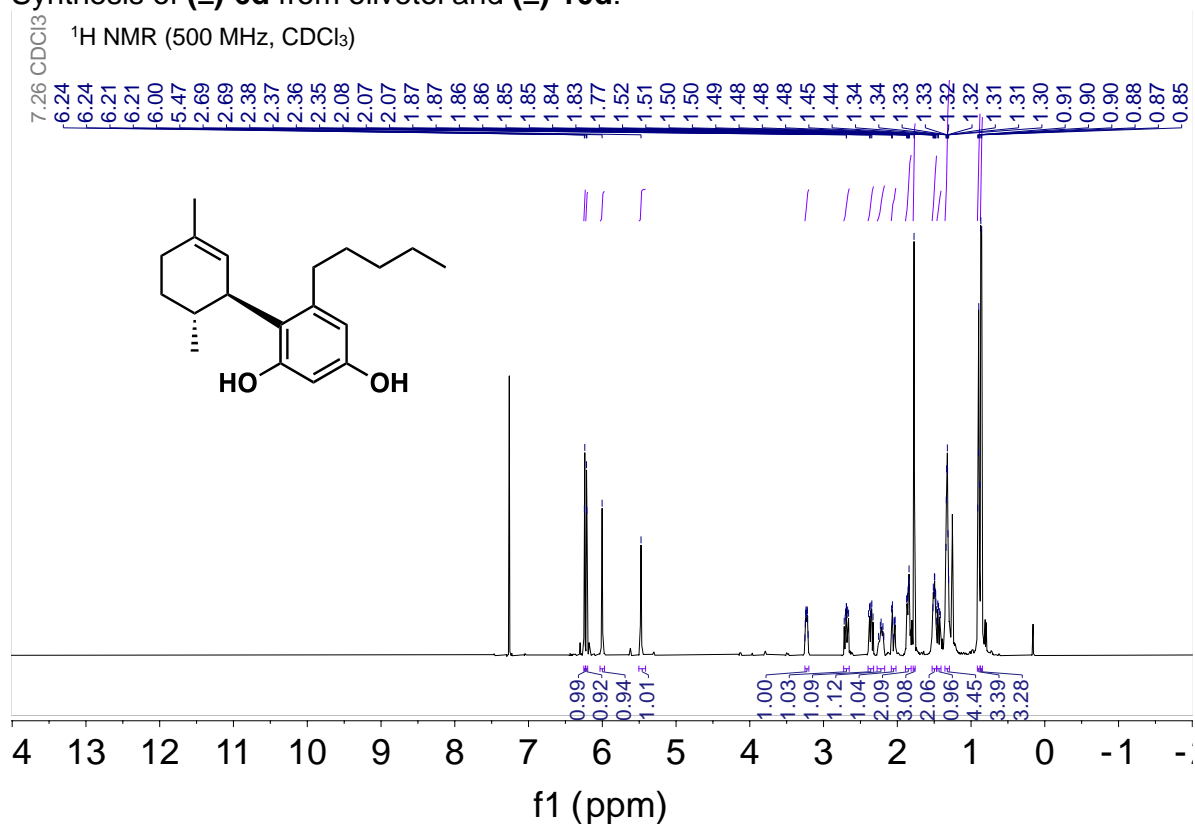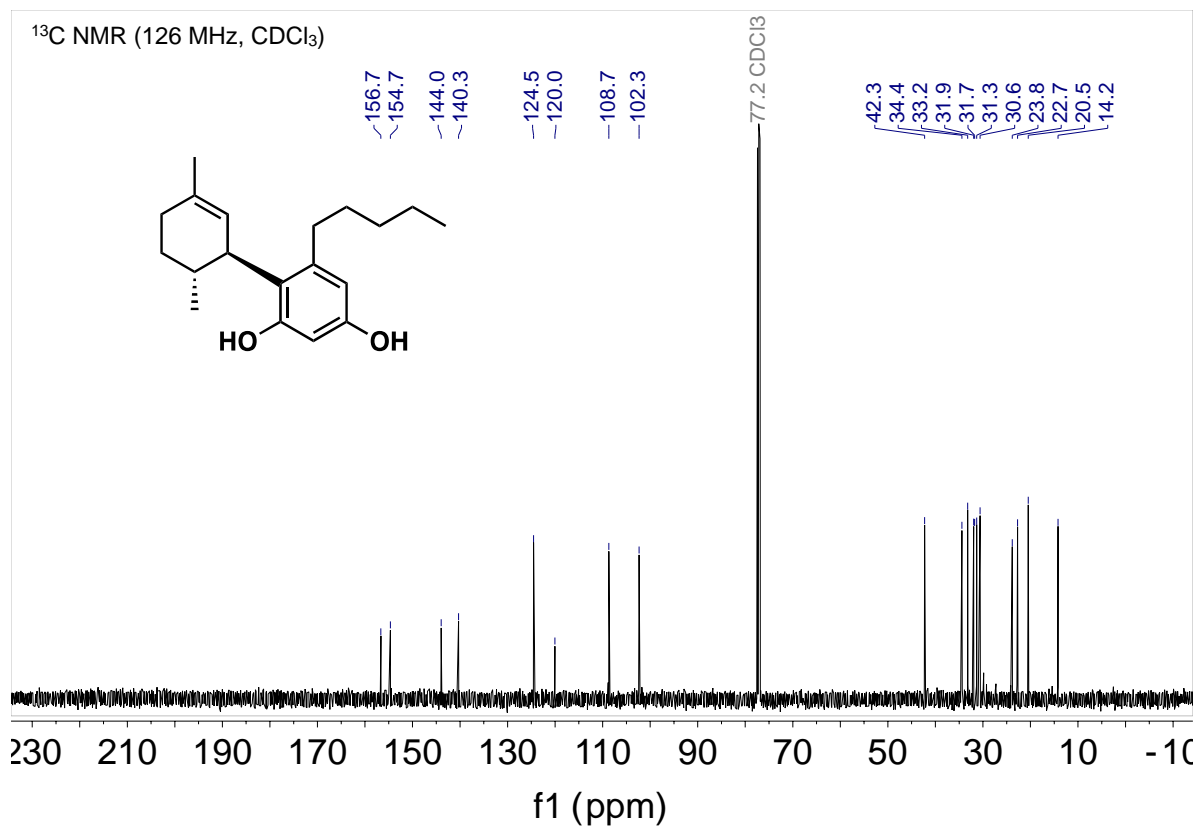

Synthesis of ( $\pm$ )-**3e** from olivetol and ( $\pm$ )-**10e**:

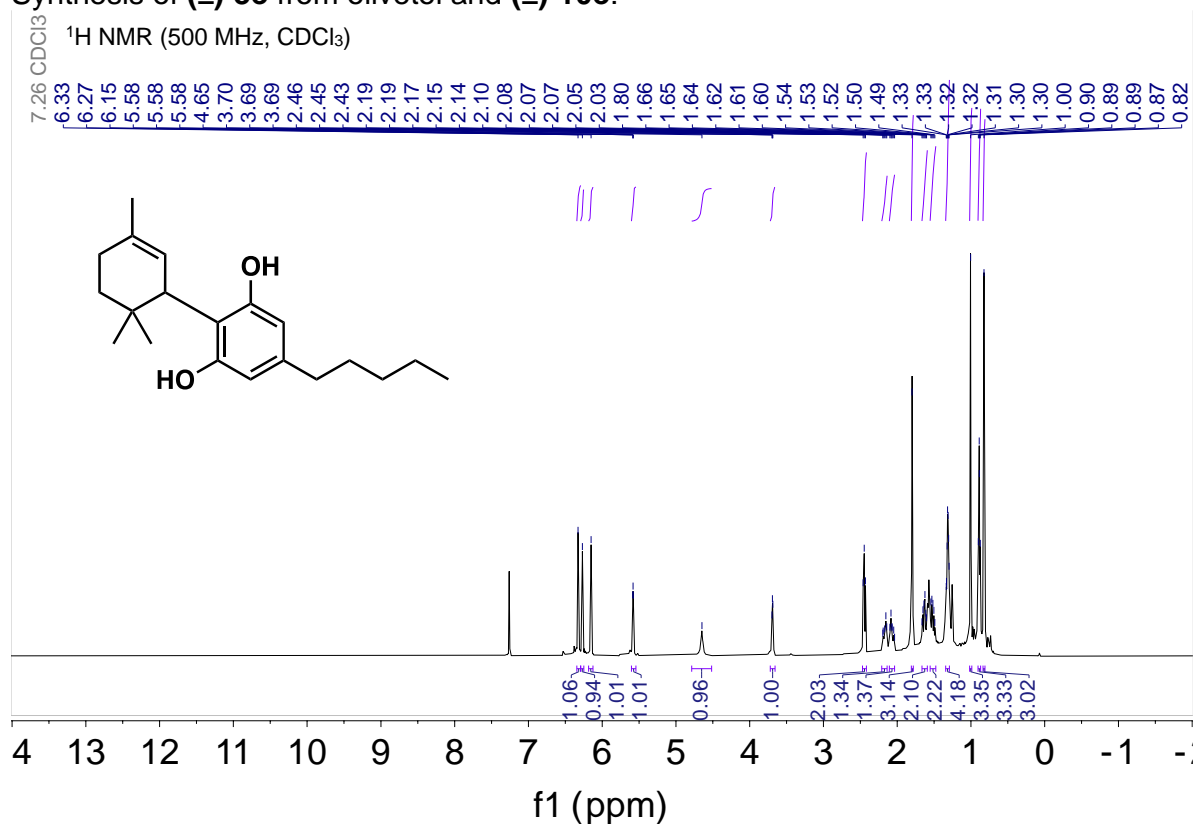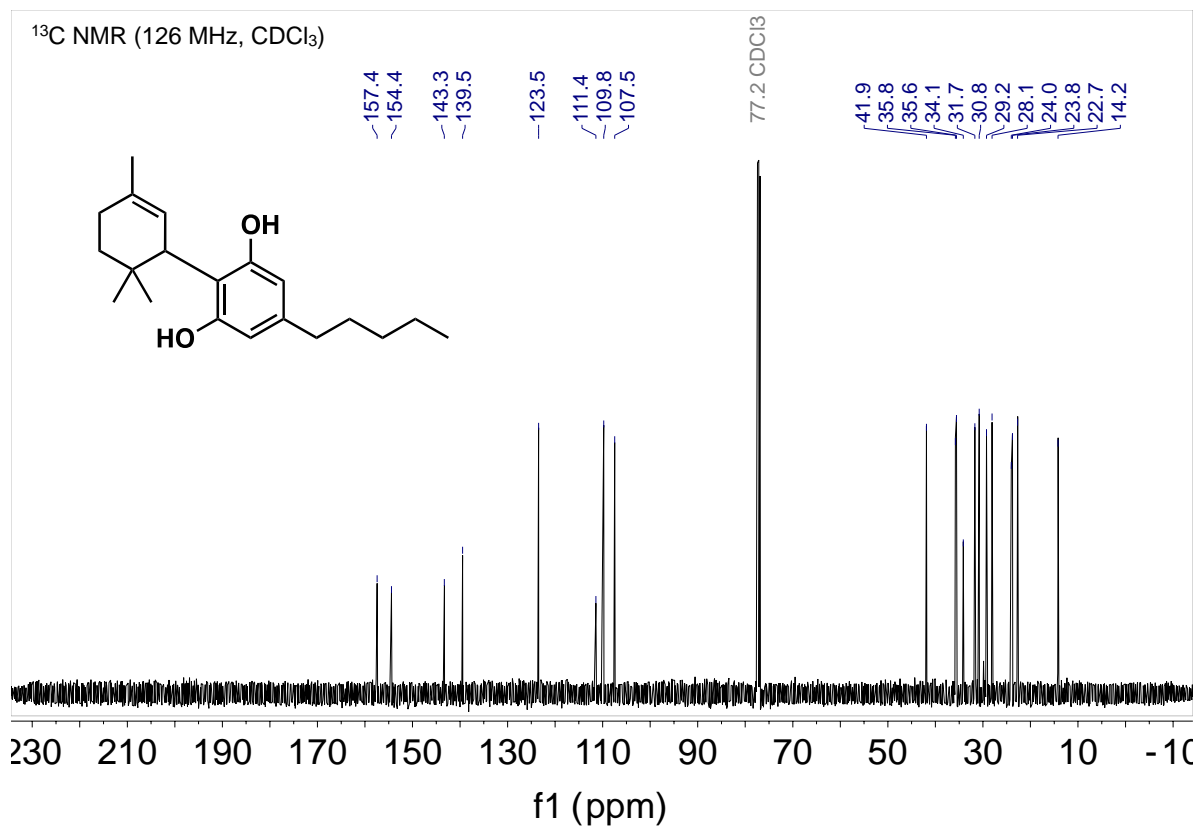



Synthesis of ( $\pm$ )-**6e** from olivetol and ( $\pm$ )-**10e**:

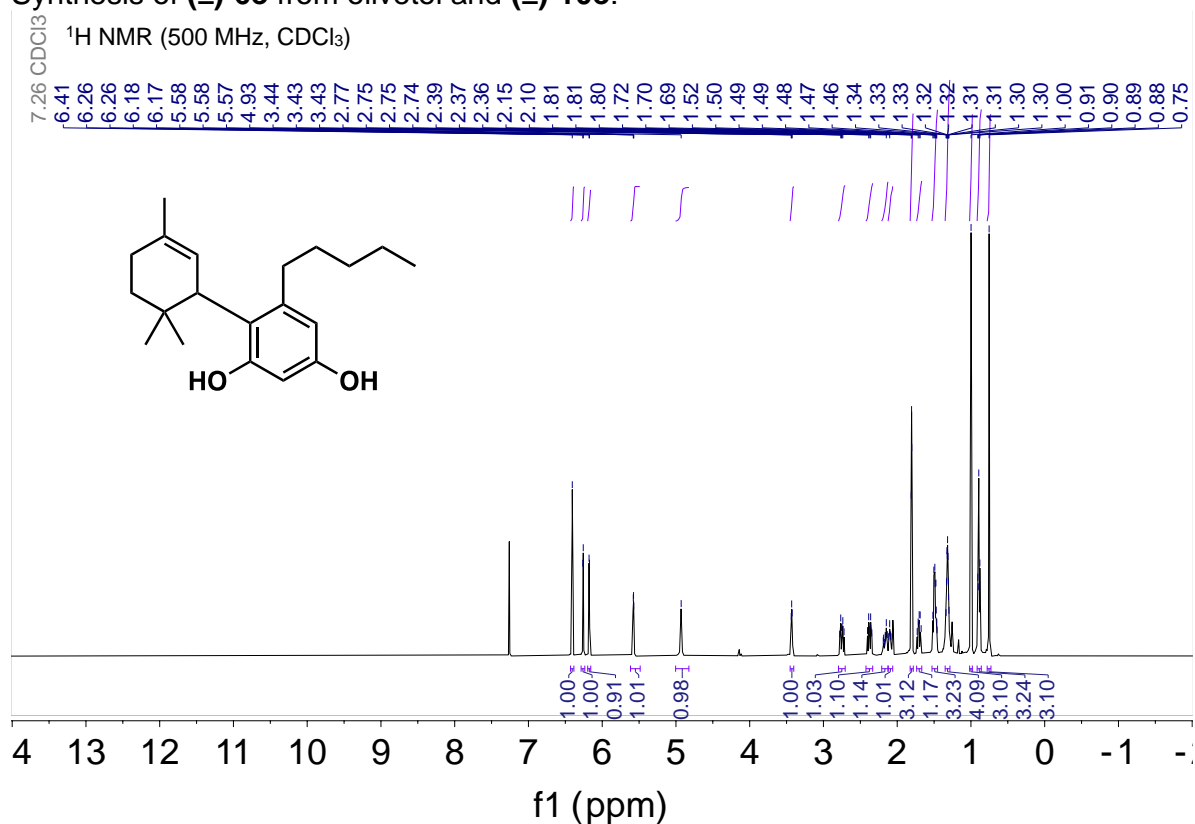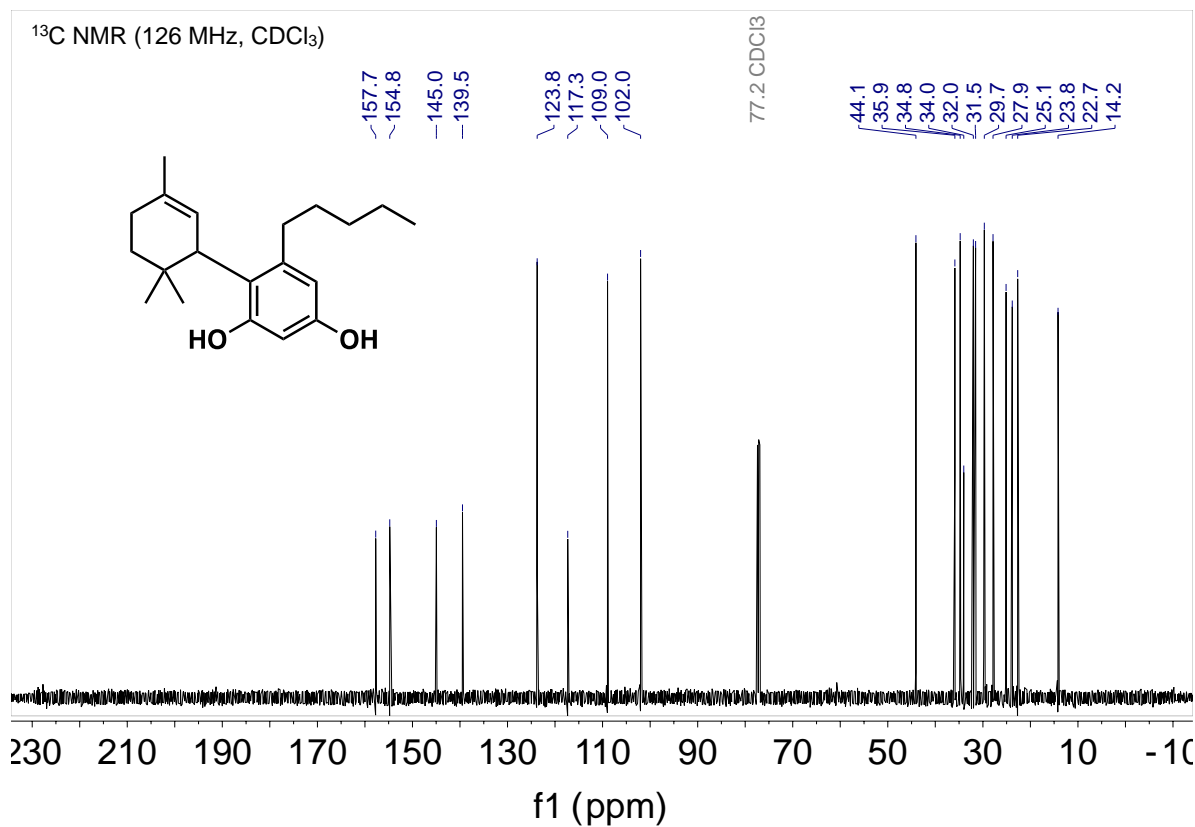

### 2D NOESY NMR analysis of ( $\pm$ )-6e

$^1\text{H}$  NOESY NMR (500 MHz,  $\text{CDCl}_3$ )

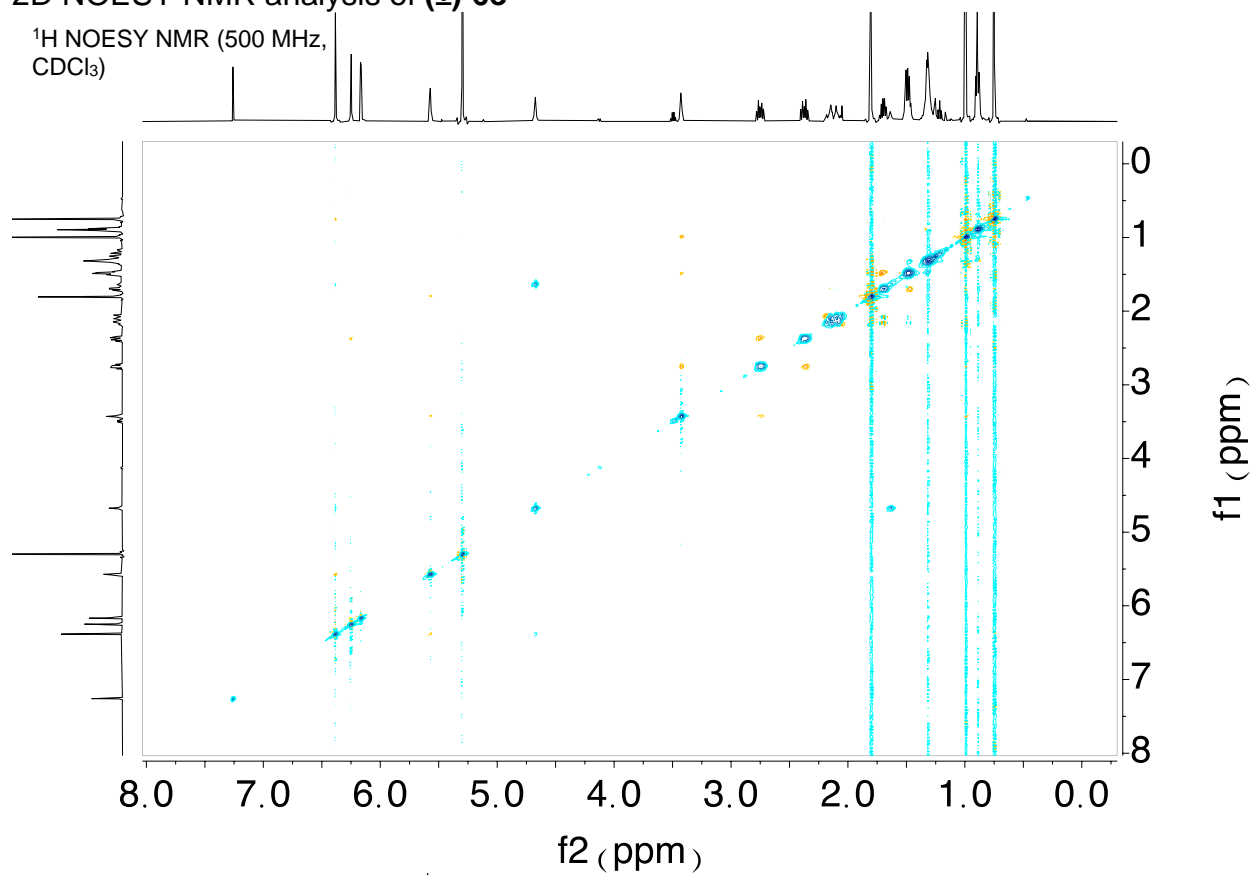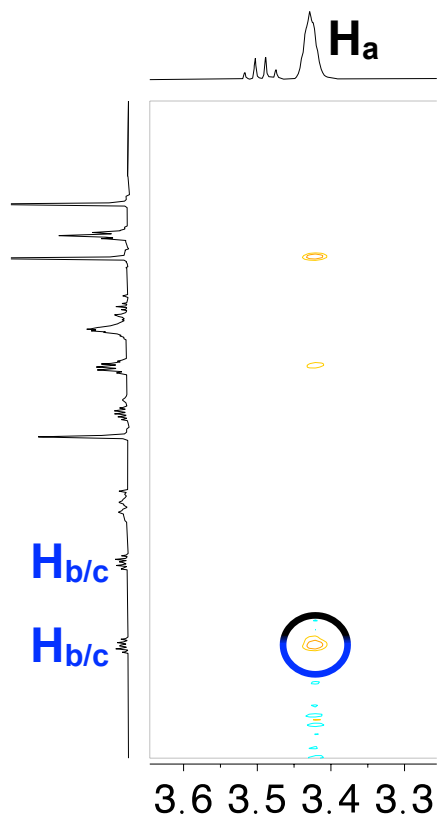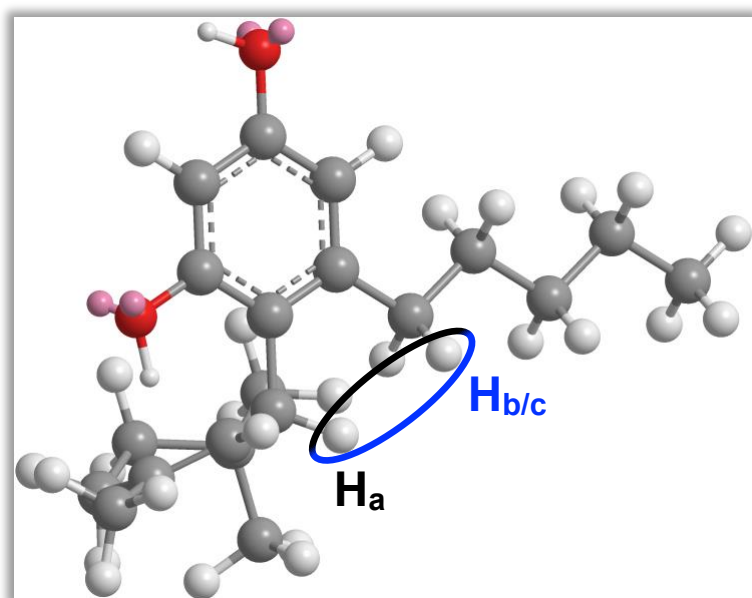

Synthesis of ( $\pm$ )-**3f** from olivetol and ( $\pm$ )-**10f**:

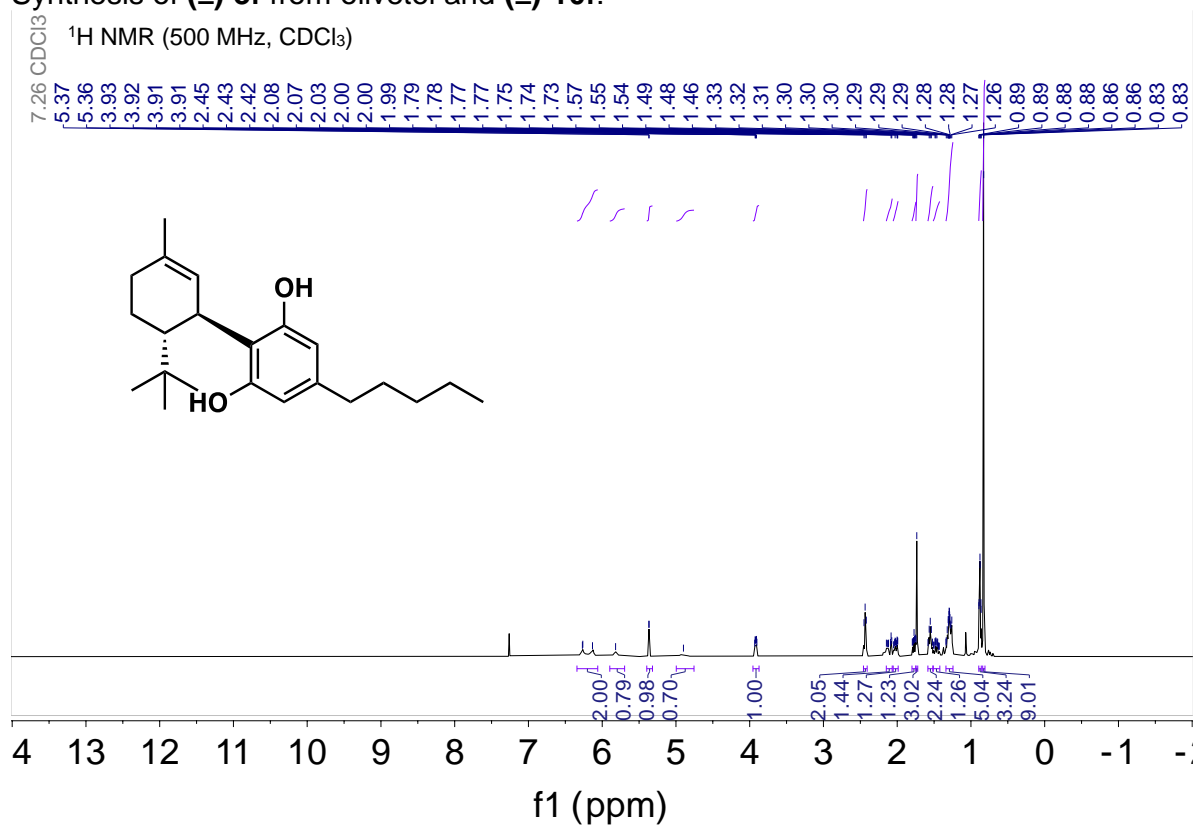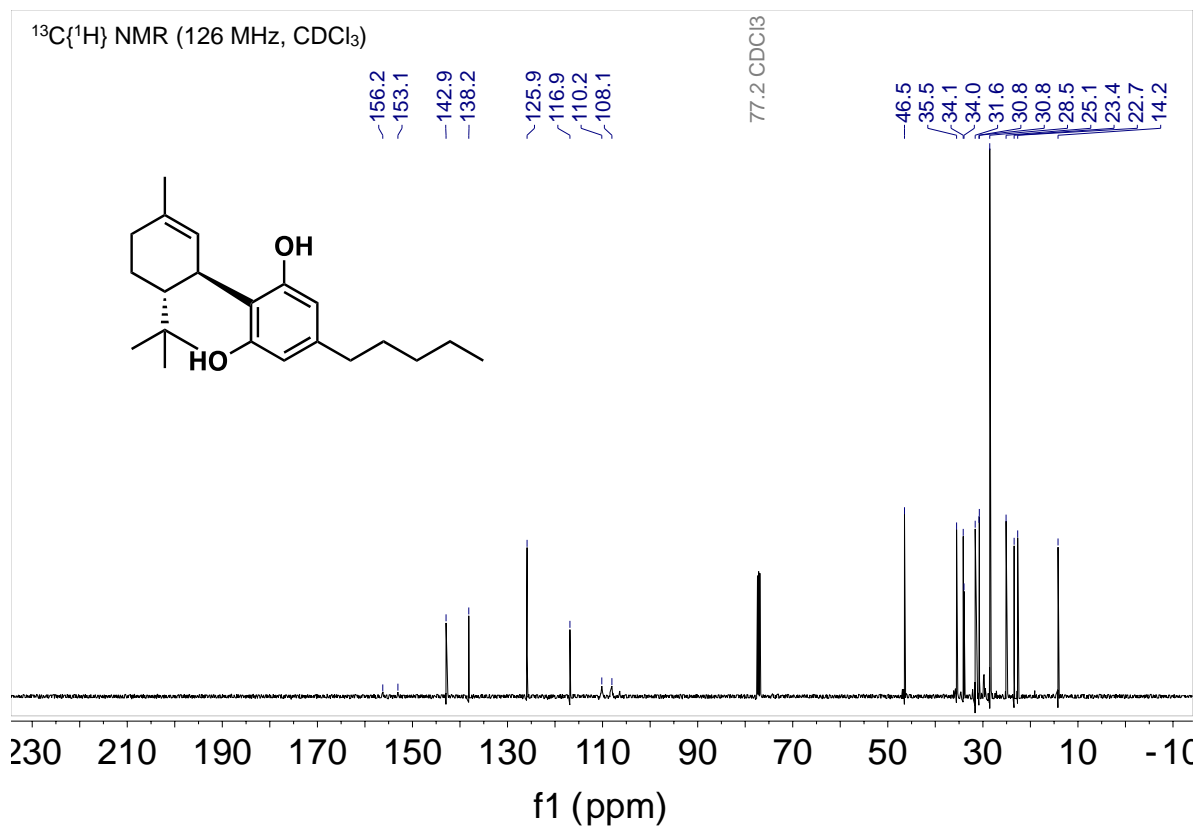

Synthesis of ( $\pm$ )-19 from olivetol and ( $\pm$ )-17:

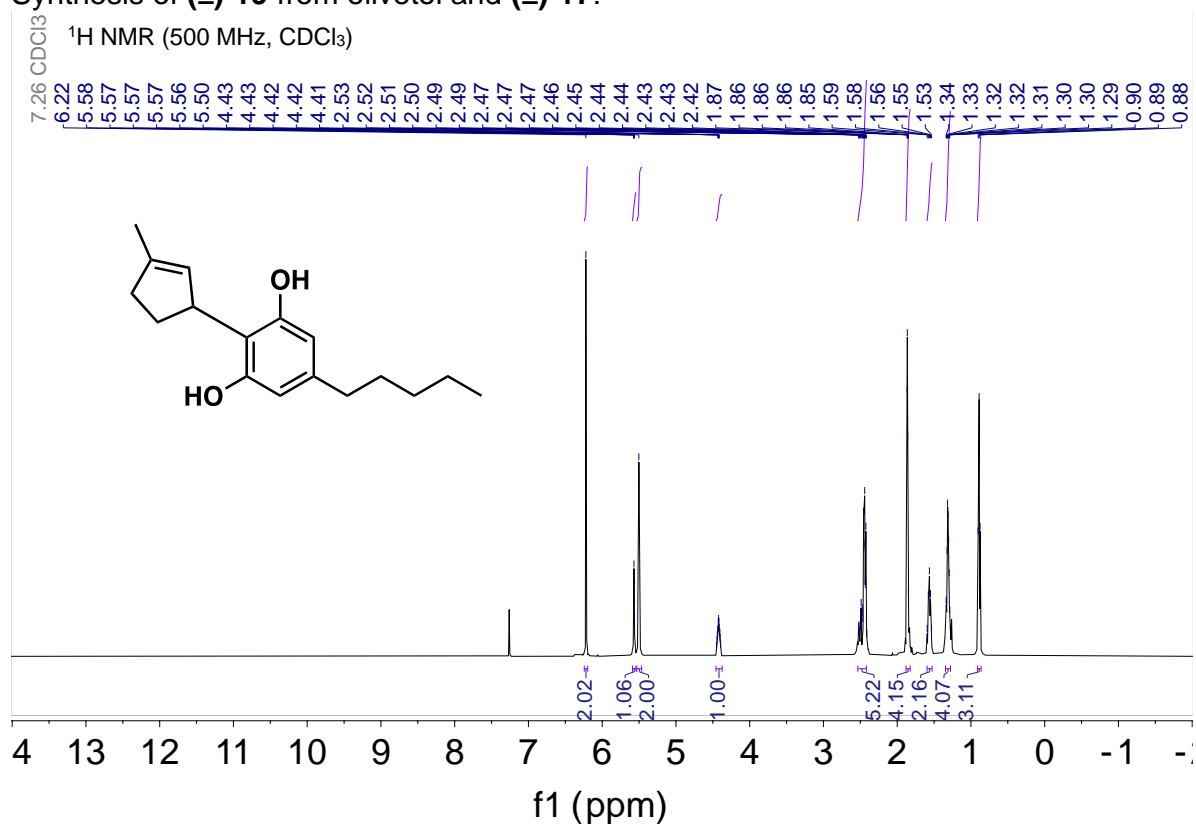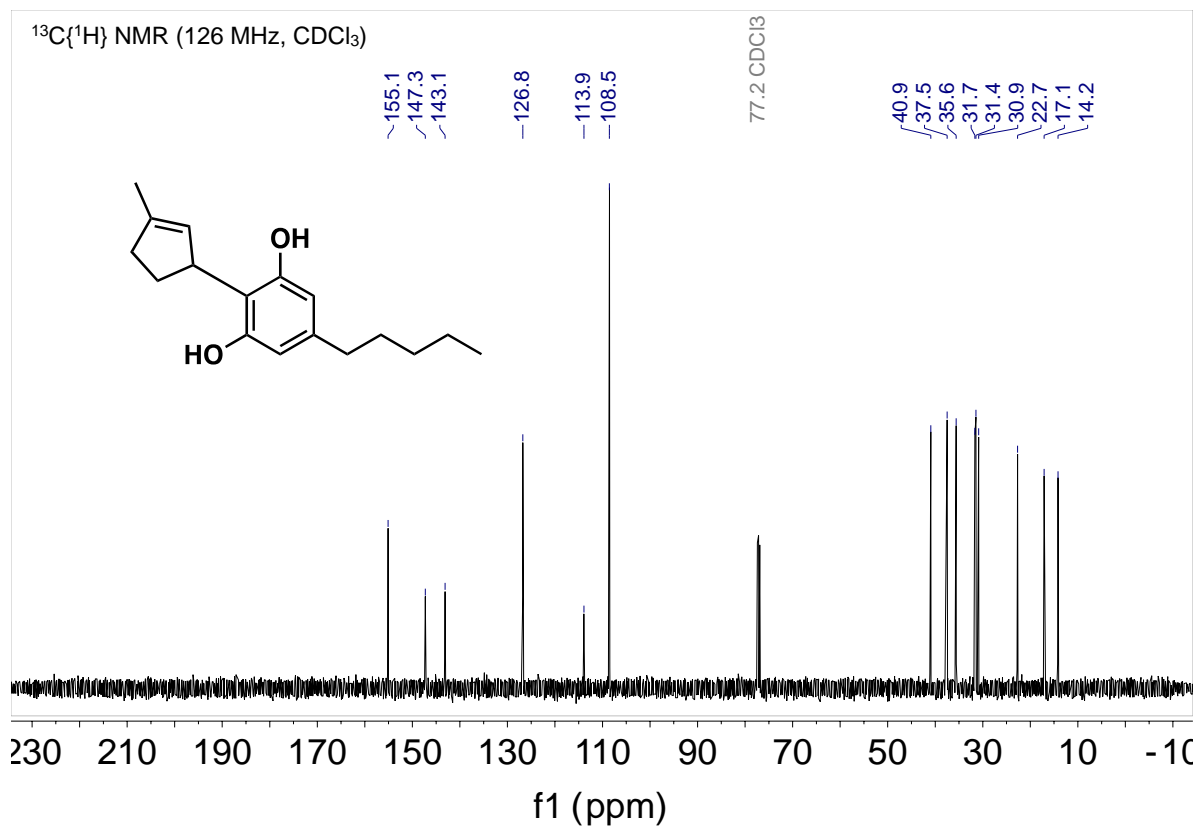

Synthesis of ( $\pm$ )-**18** from olivetol and ( $\pm$ )-**17**:

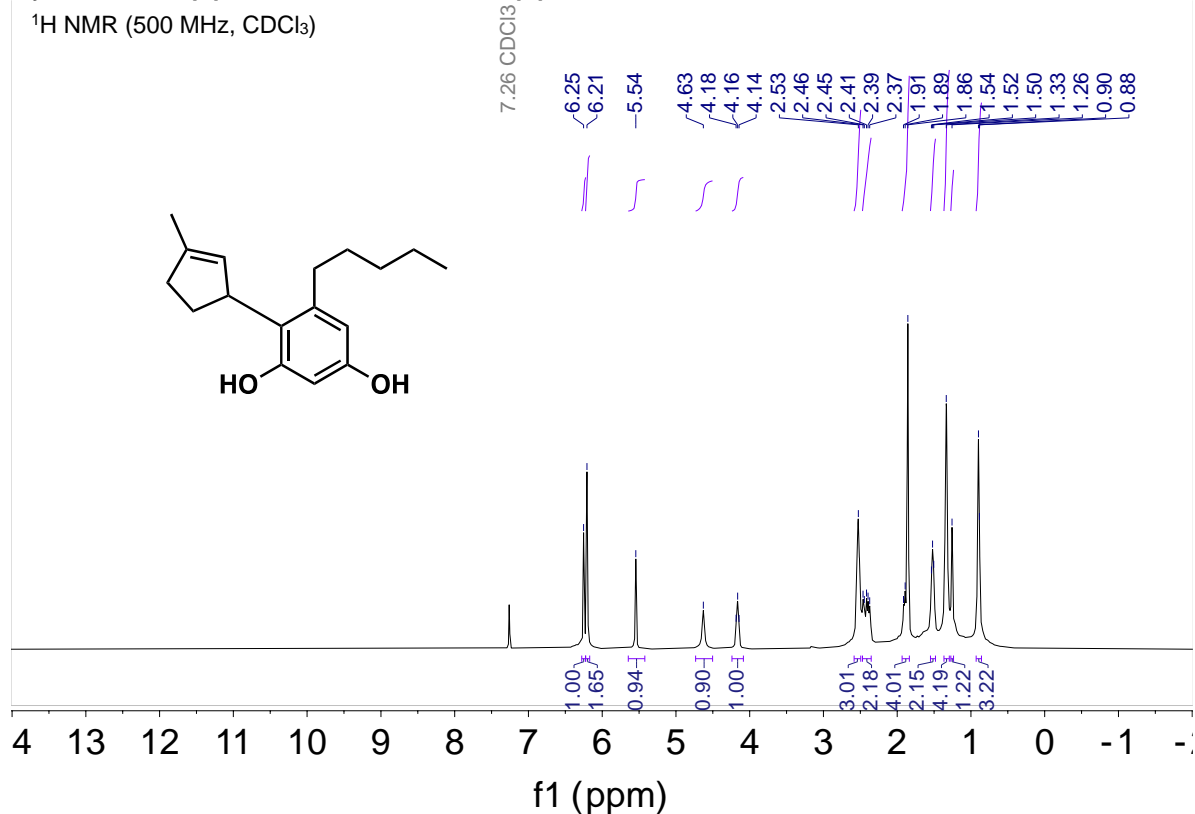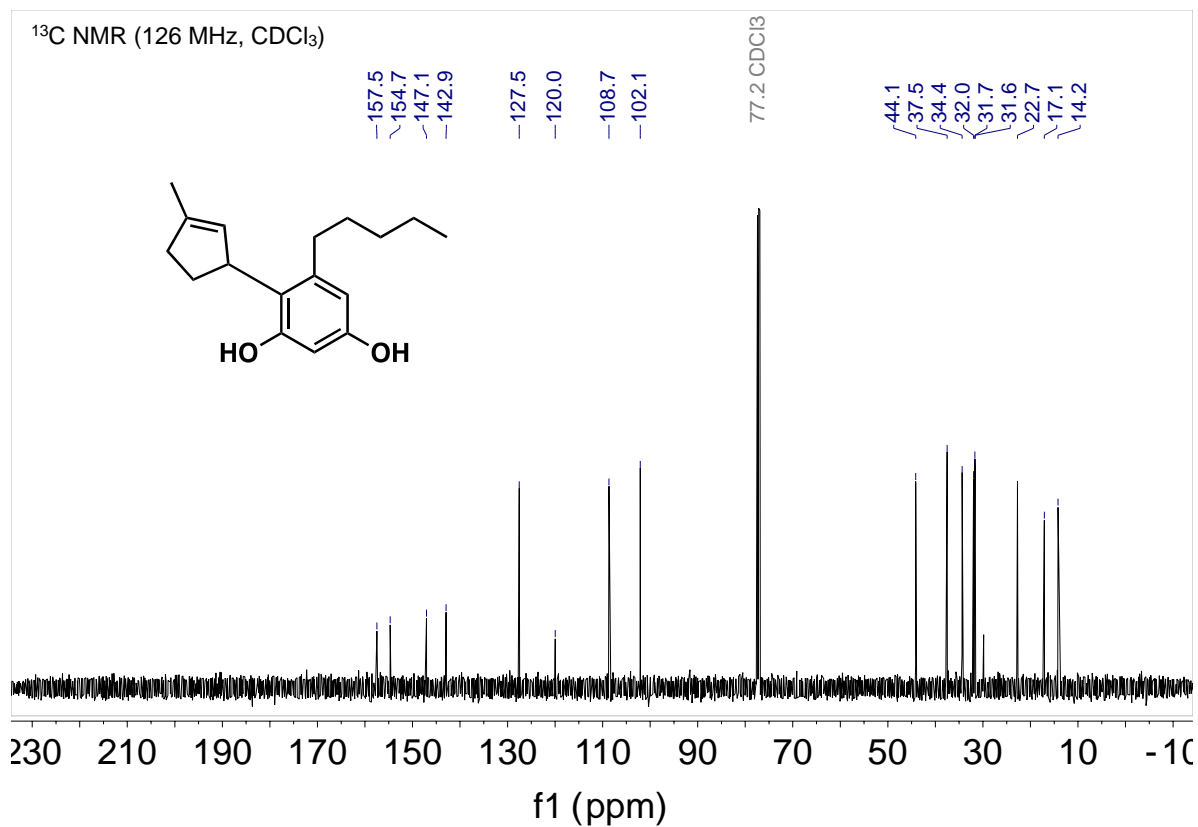

Synthesis of ( $\pm$ )-22 from olivetol and ( $\pm$ )-20:

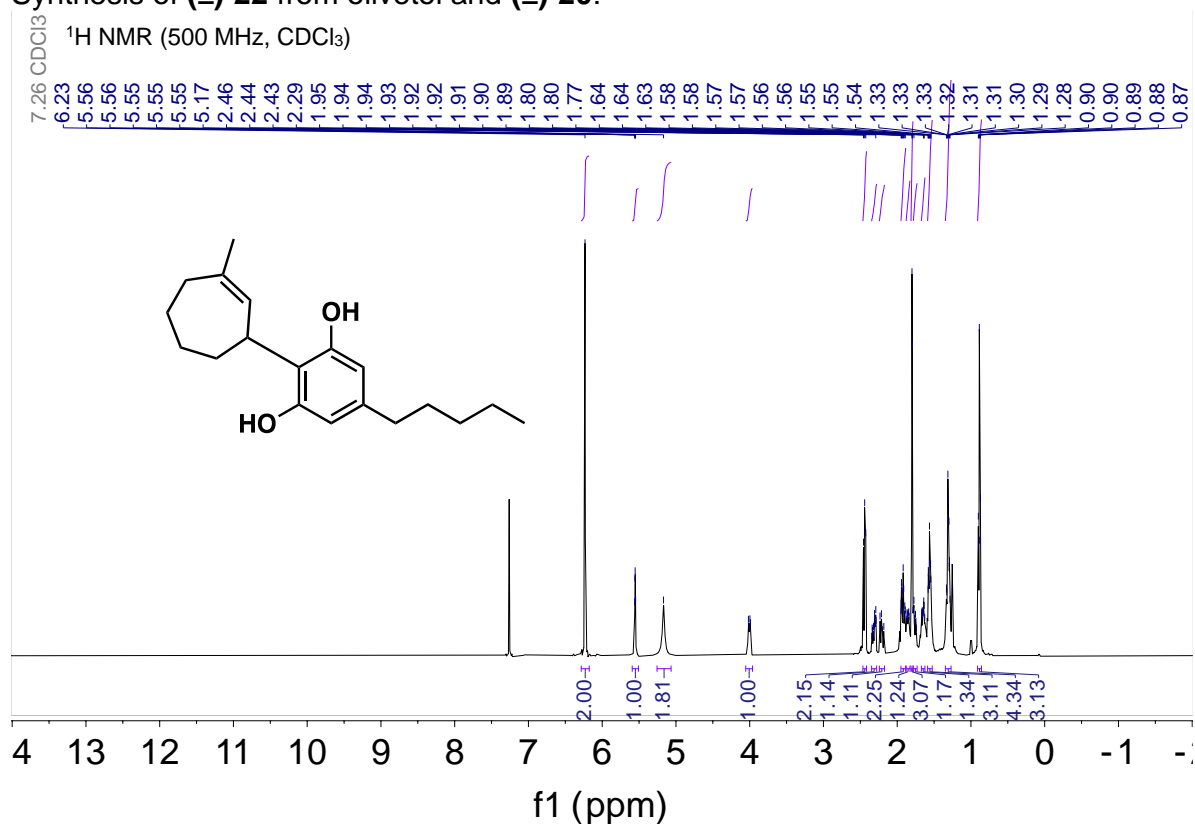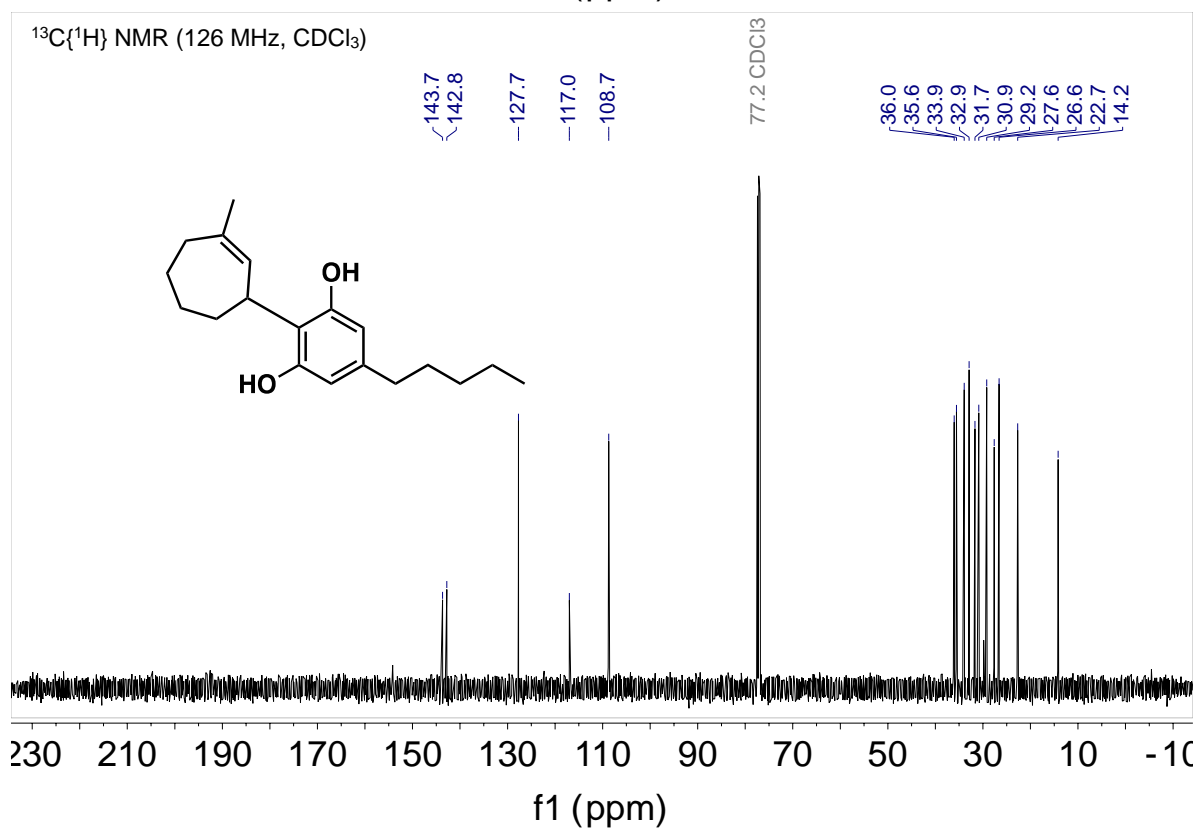

Synthesis of ( $\pm$ )-21 from olivetol and ( $\pm$ )-20:

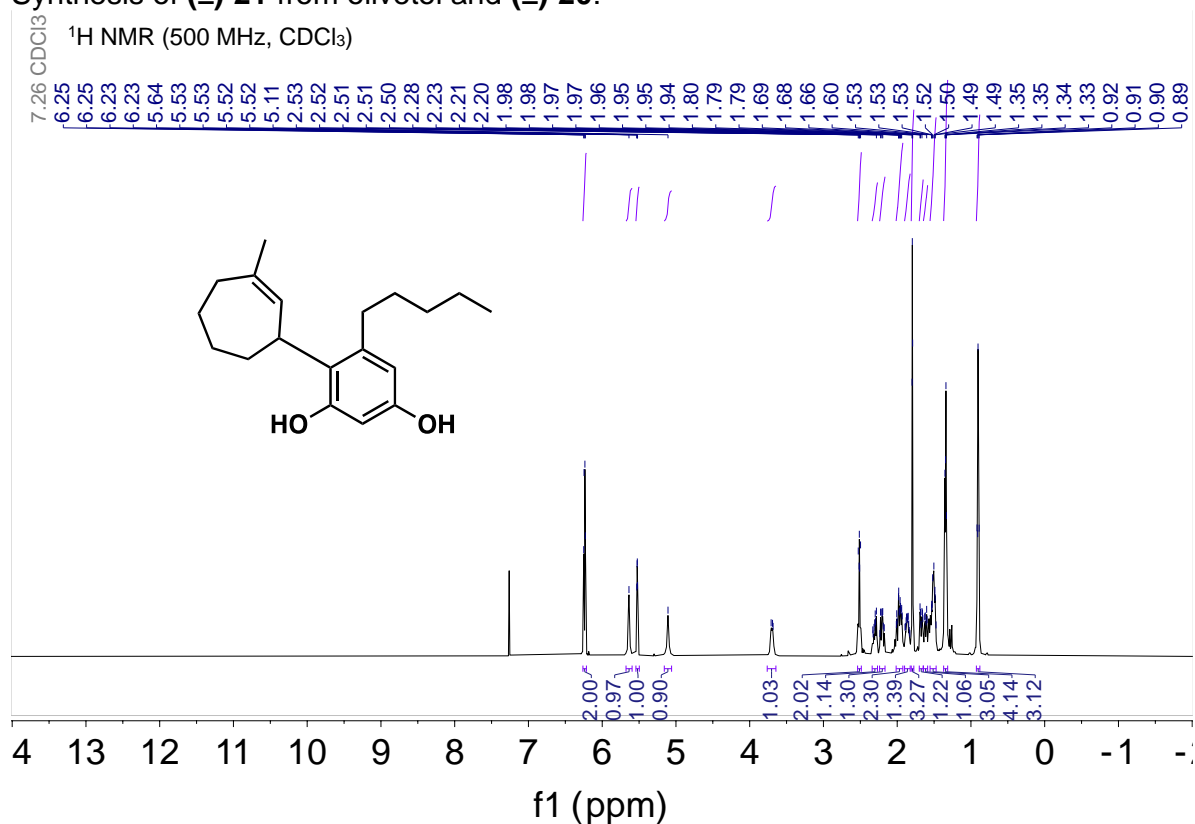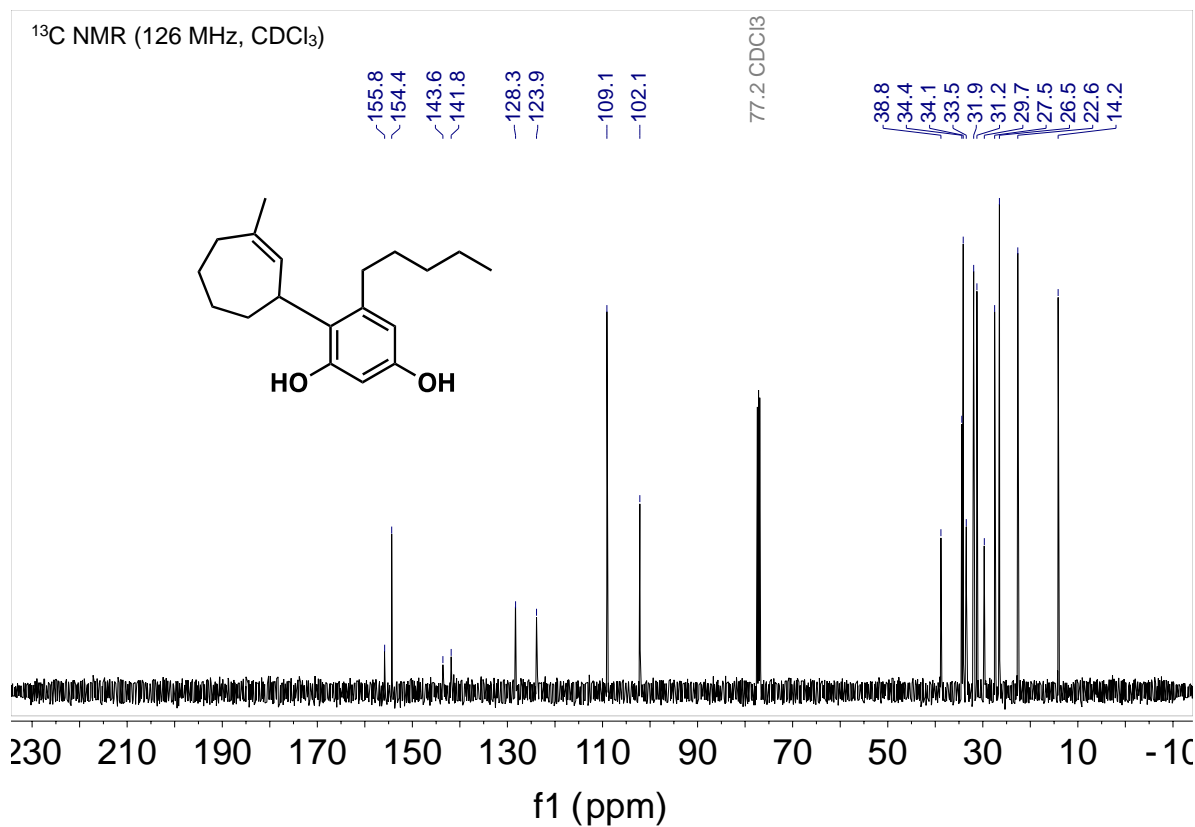

Synthesis of ( $\pm$ )-**3bc** from 5-(1,1-Dimethyl-heptyl)resorcinol and ( $\pm$ )-**10c**:

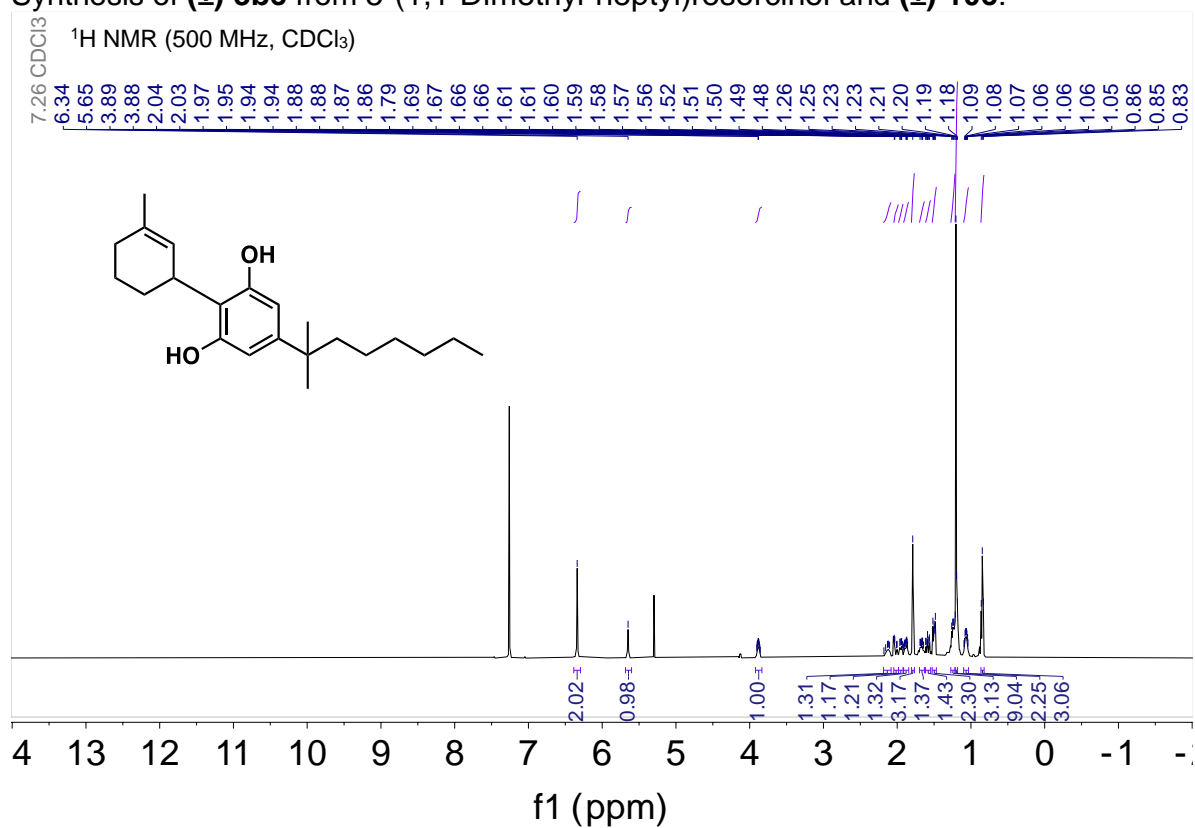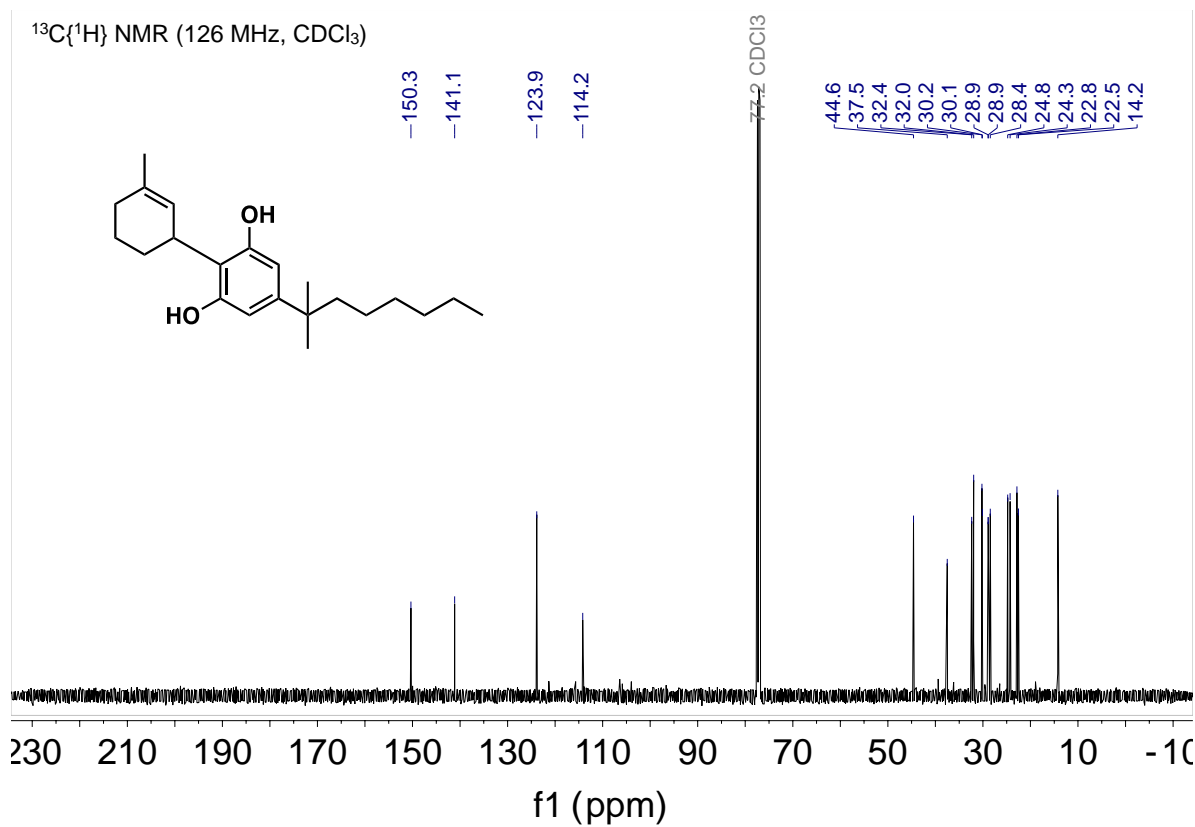



Synthesis of ( $\pm$ )-**3bd** from 5-(1,1-Dimethyl-heptyl)resorcinol and ( $\pm$ )-**10d**:

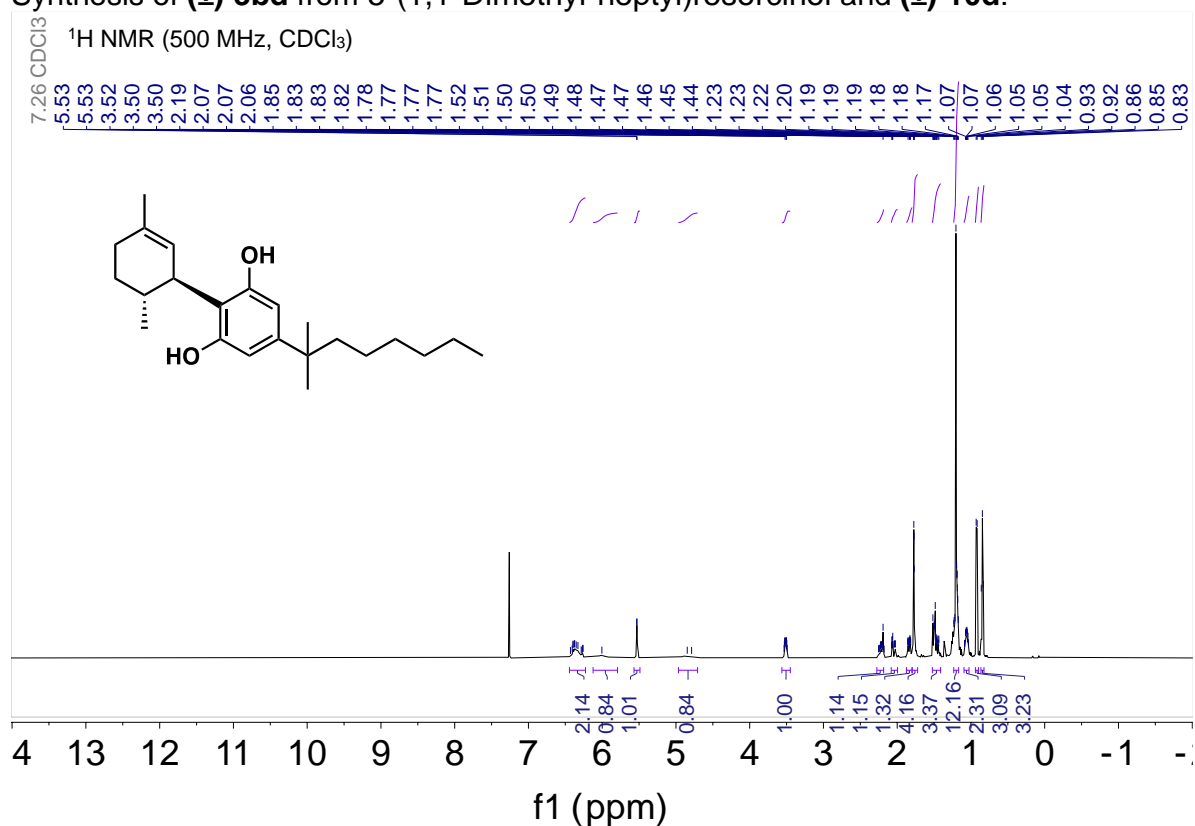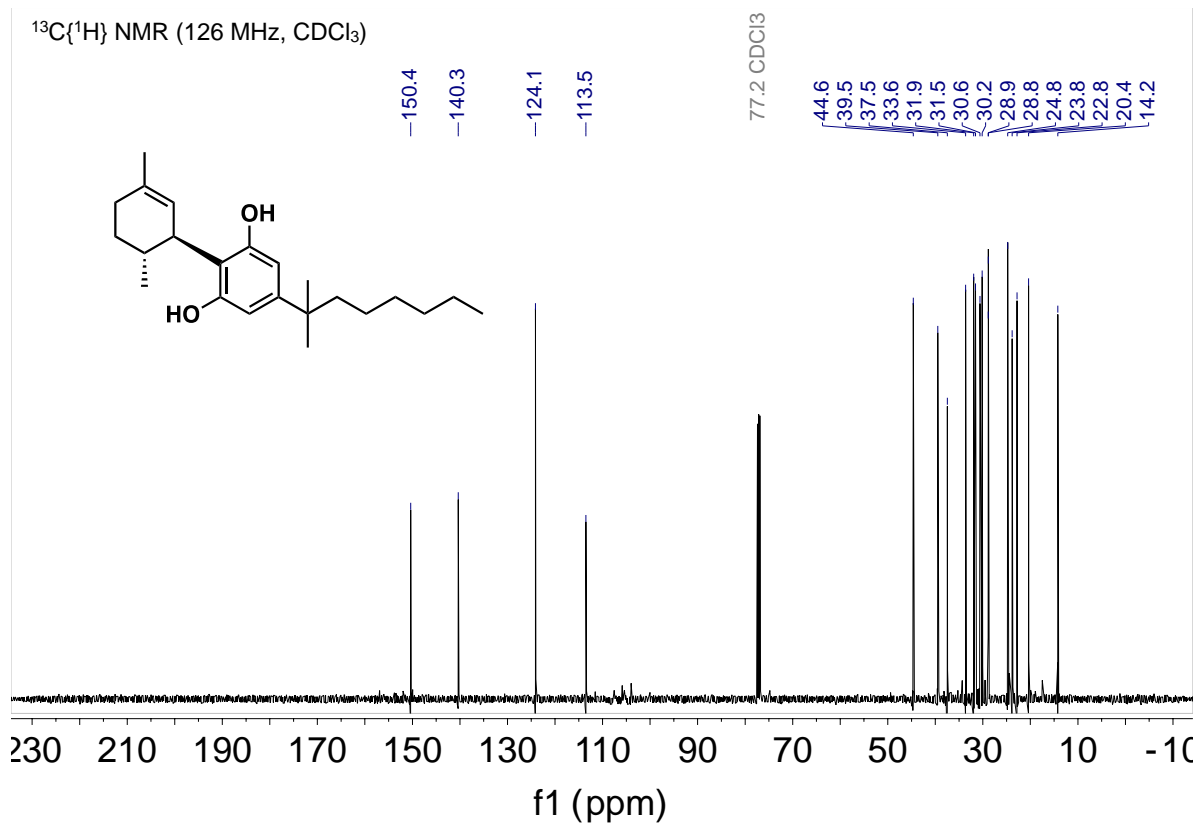

Synthesis of ( $\pm$ )-**3be** from 5-(1,1-Dimethyl-heptyl)resorcinol and ( $\pm$ )-**10e**:

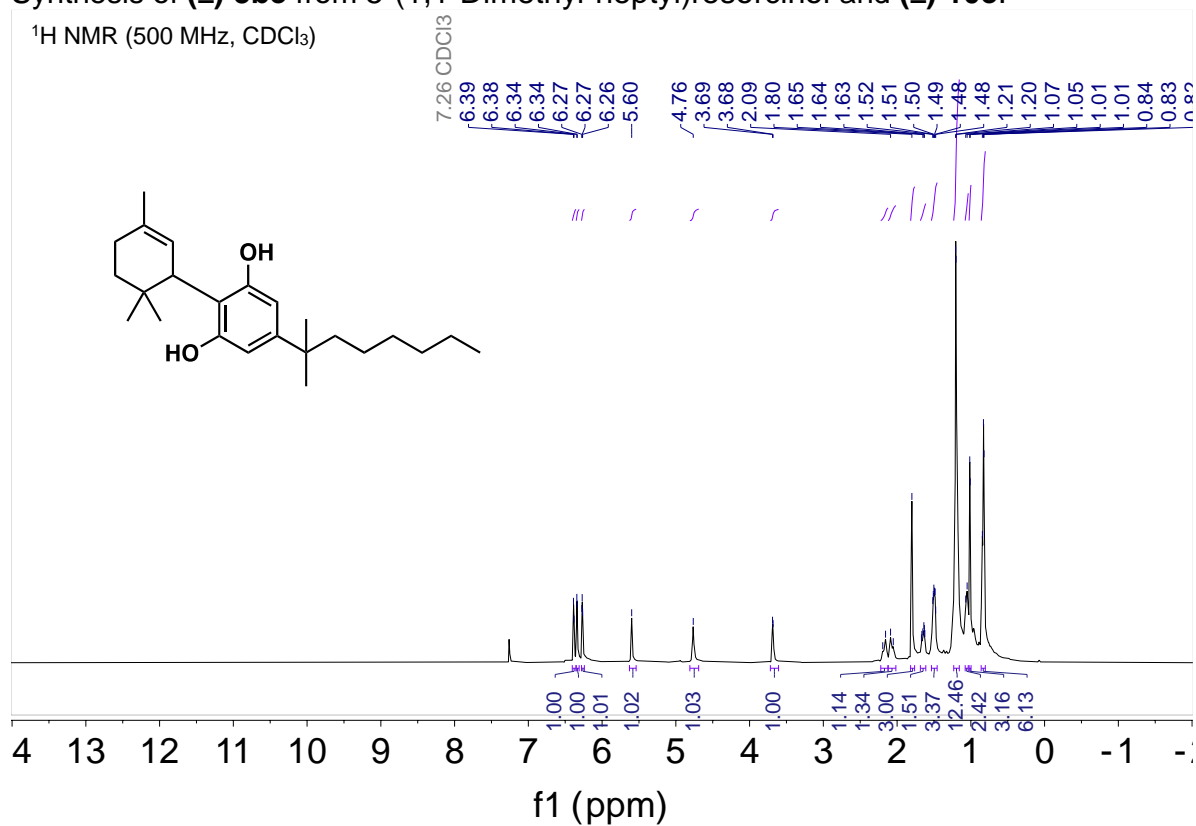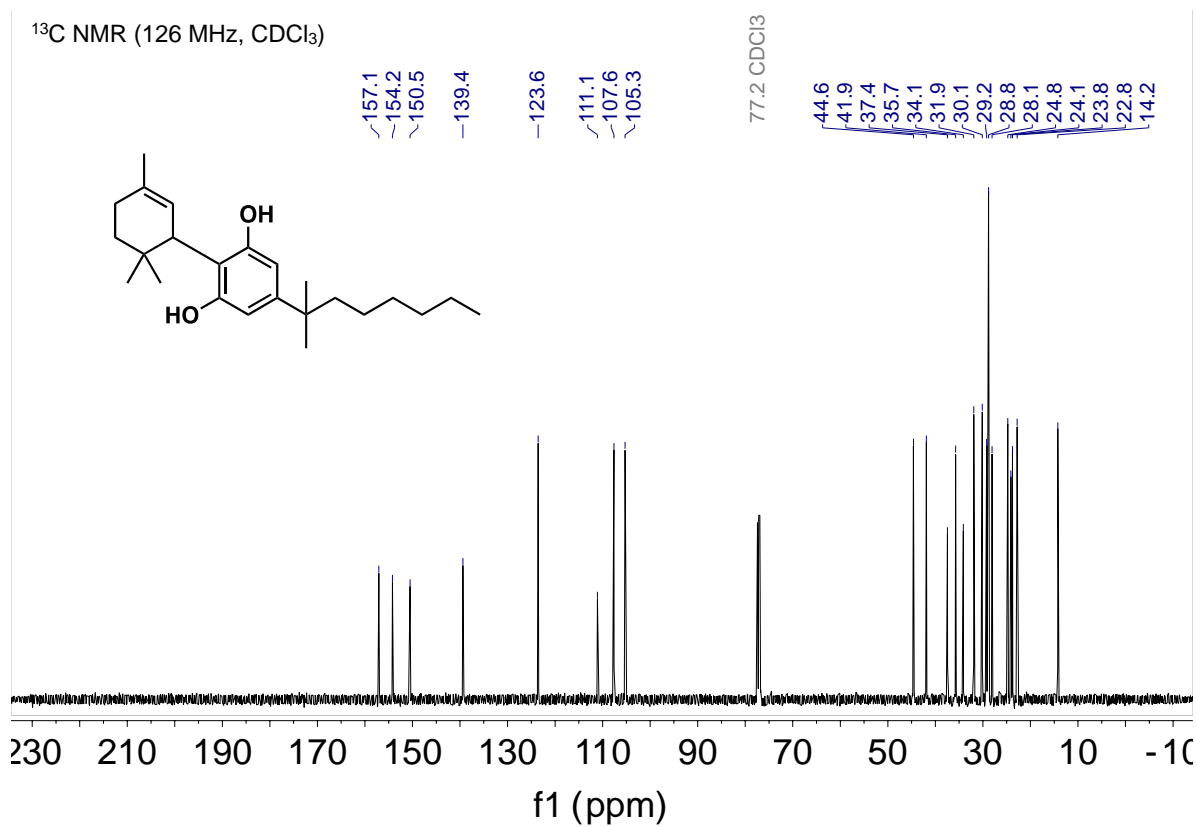

Synthesis of ( $\pm$ )-**3b** from 5-(1,1-Dimethyl-heptyl)resorcinol and ( $\pm$ )-**10**:

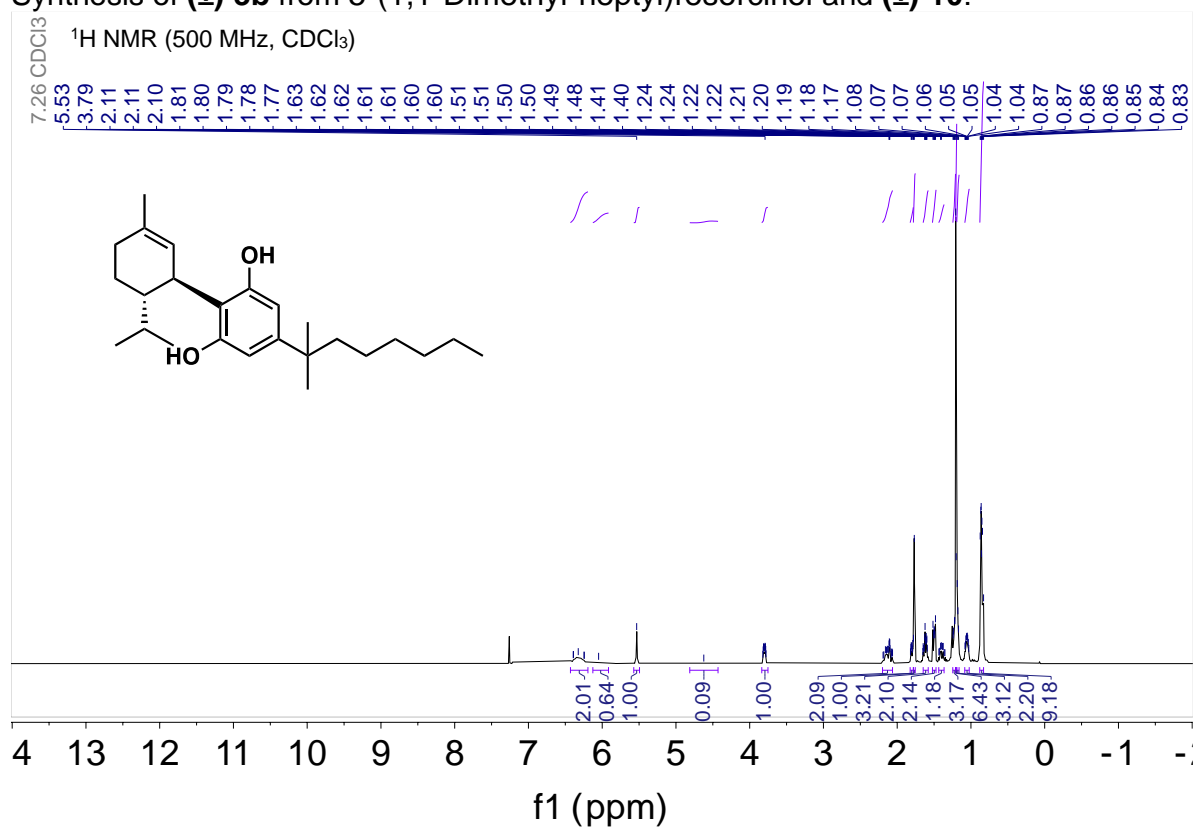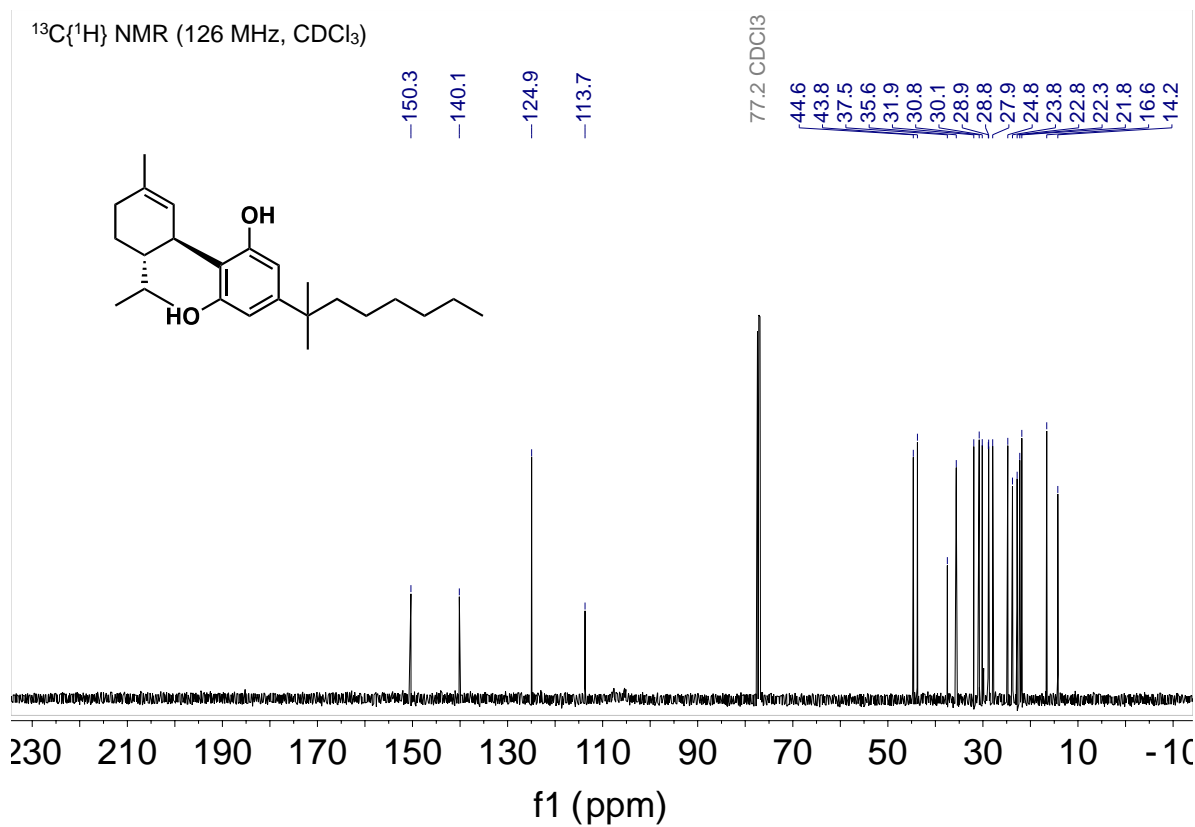

Synthesis of ( $\pm$ )-**3bf** from 5-(1,1-Dimethyl-heptyl)resorcinol and ( $\pm$ )-**10f**:

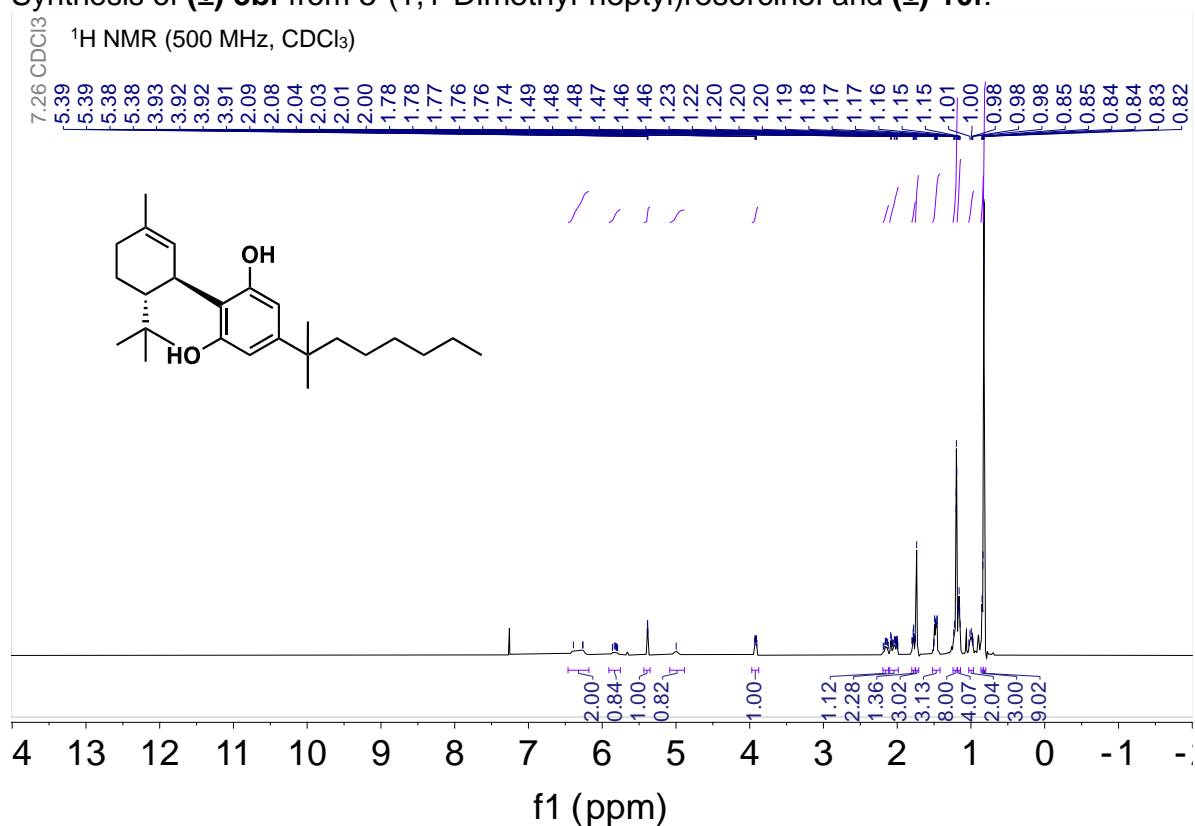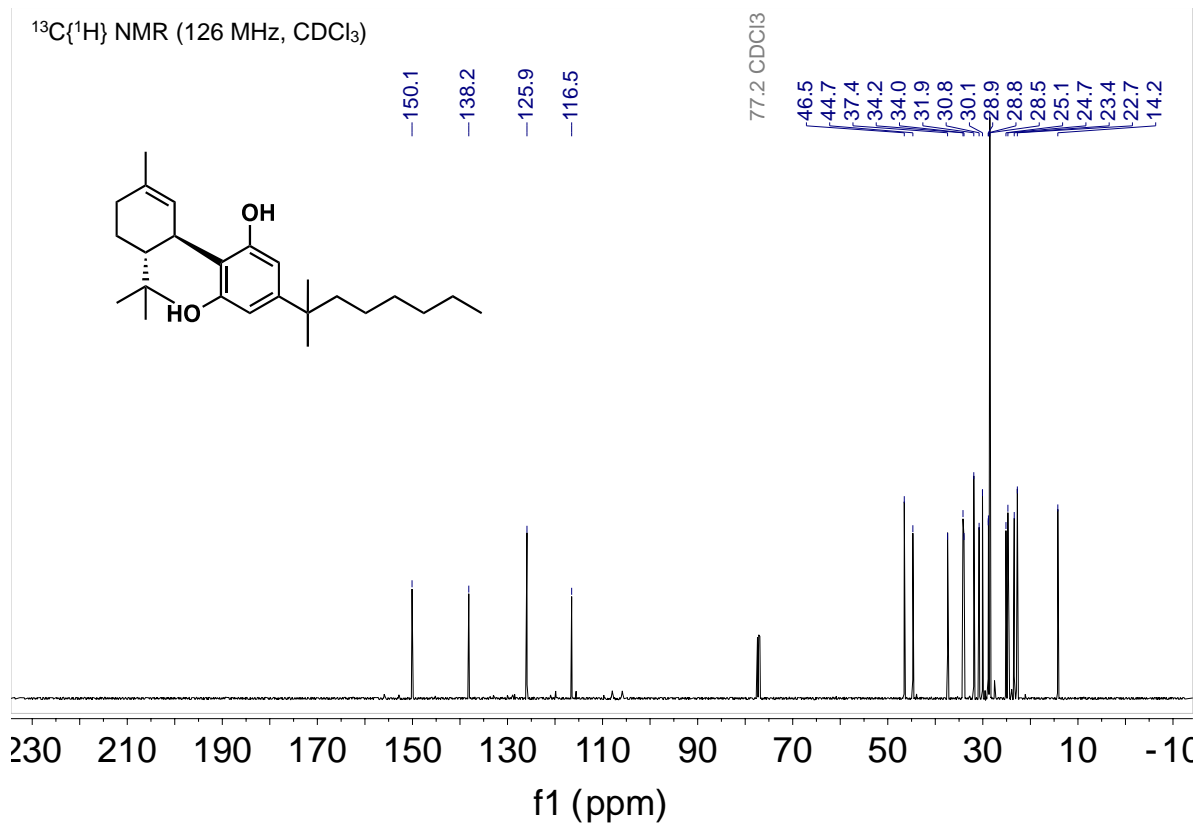

Synthesis of ( $\pm$ )-**19b** from 5-(1,1-Dimethyl-heptyl)resorcinol and ( $\pm$ )-**17**:

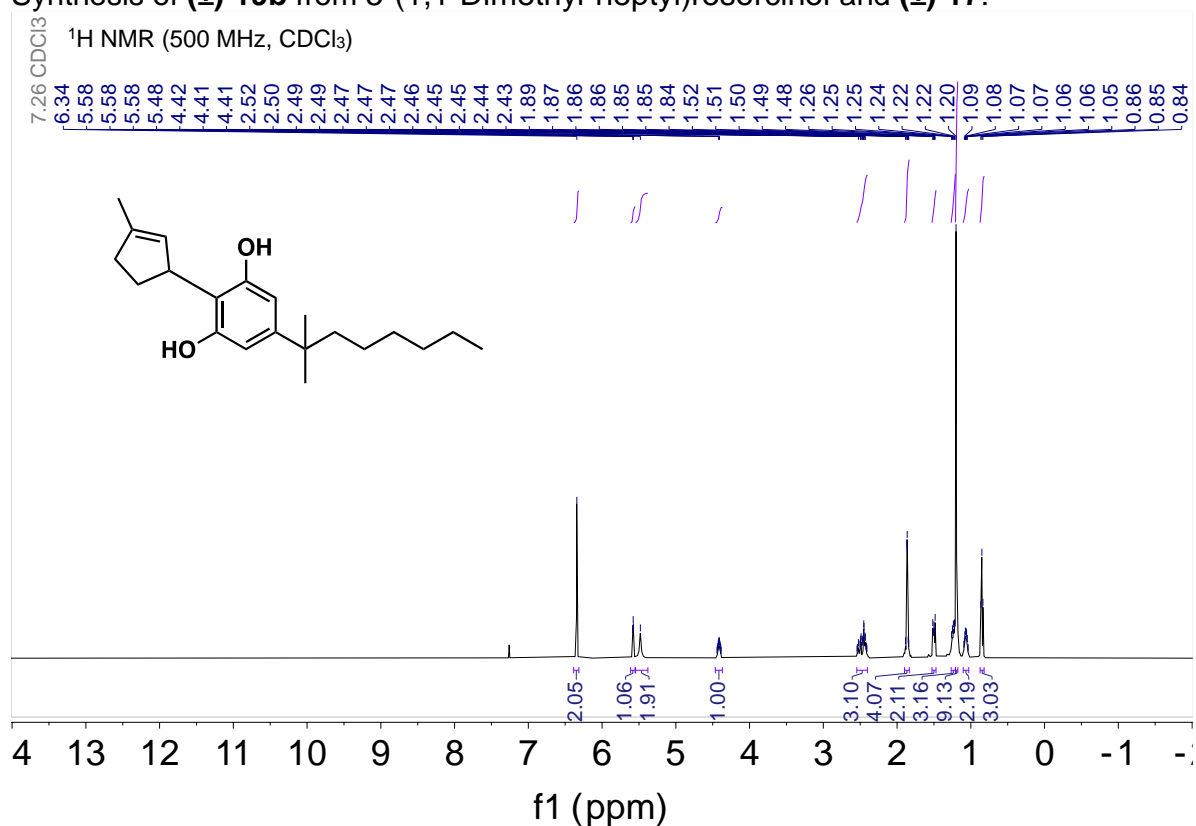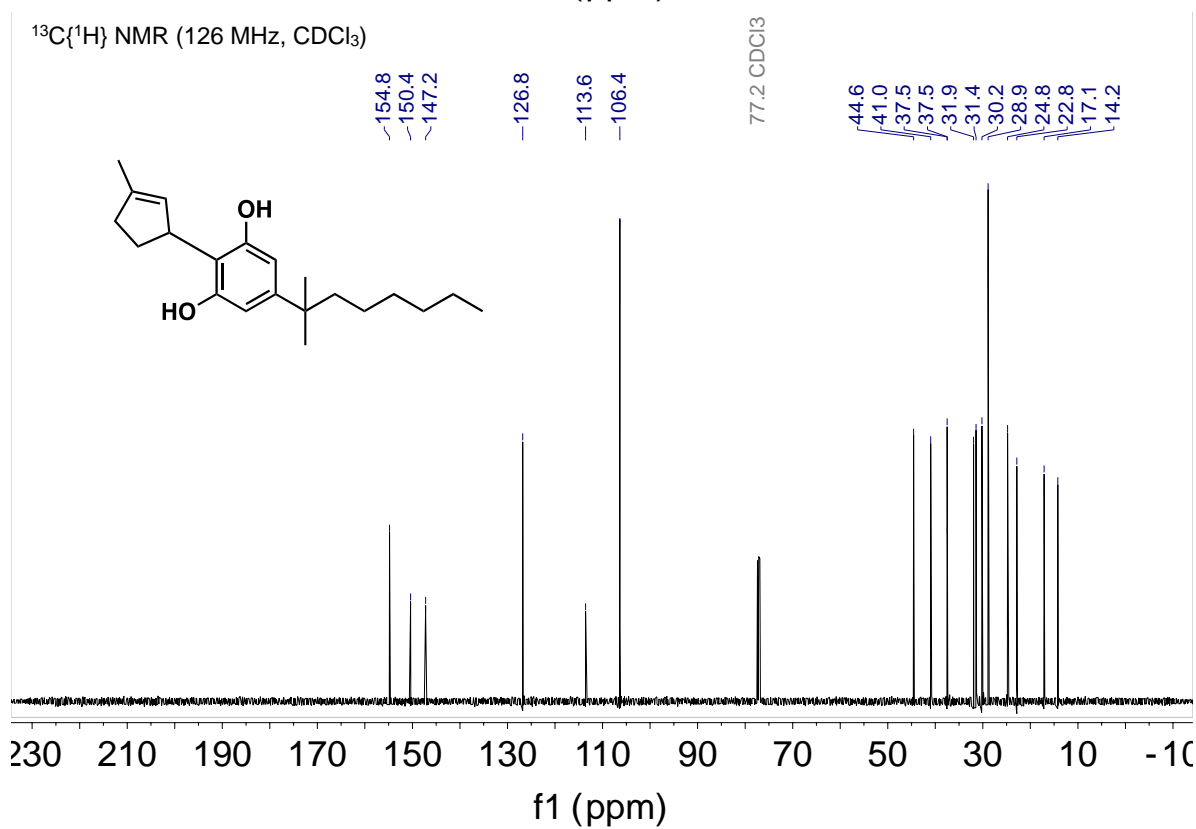

Synthesis of ( $\pm$ )-**22b** from 5-(1,1-Dimethyl-heptyl)resorcinol and ( $\pm$ )-**20**:

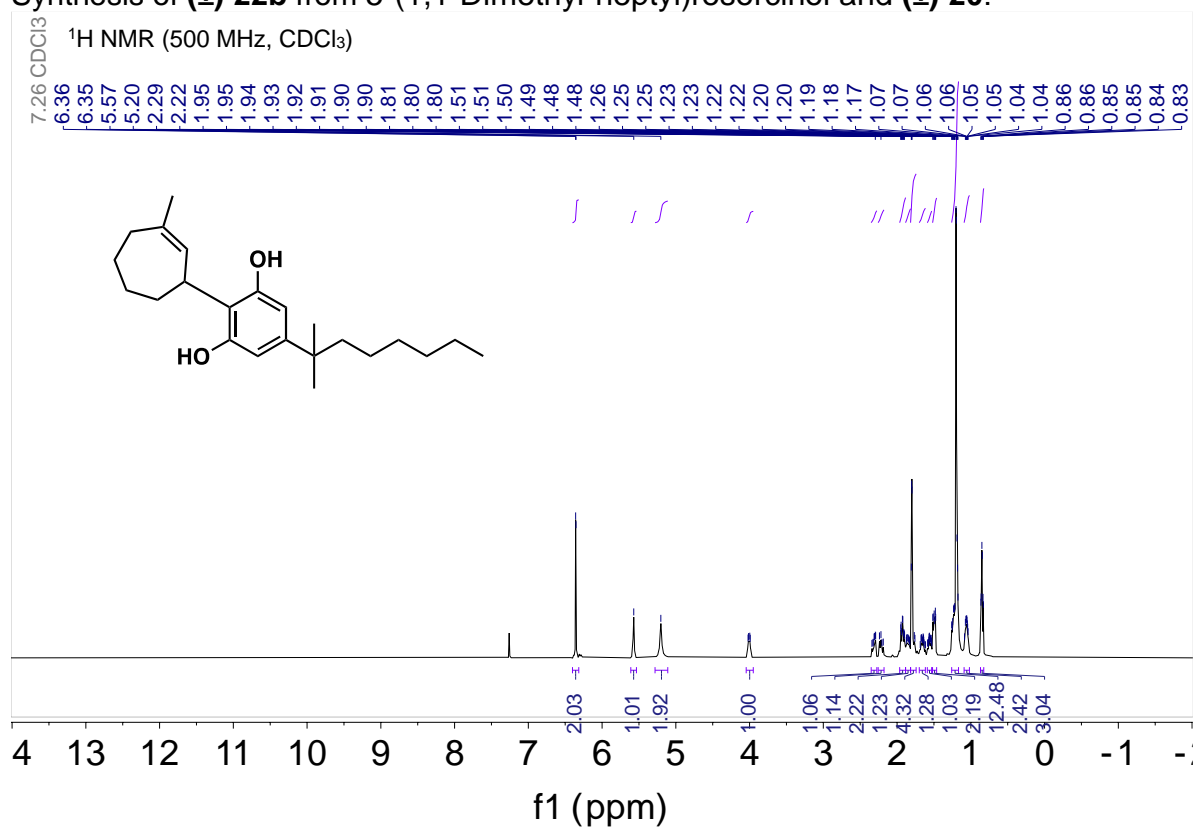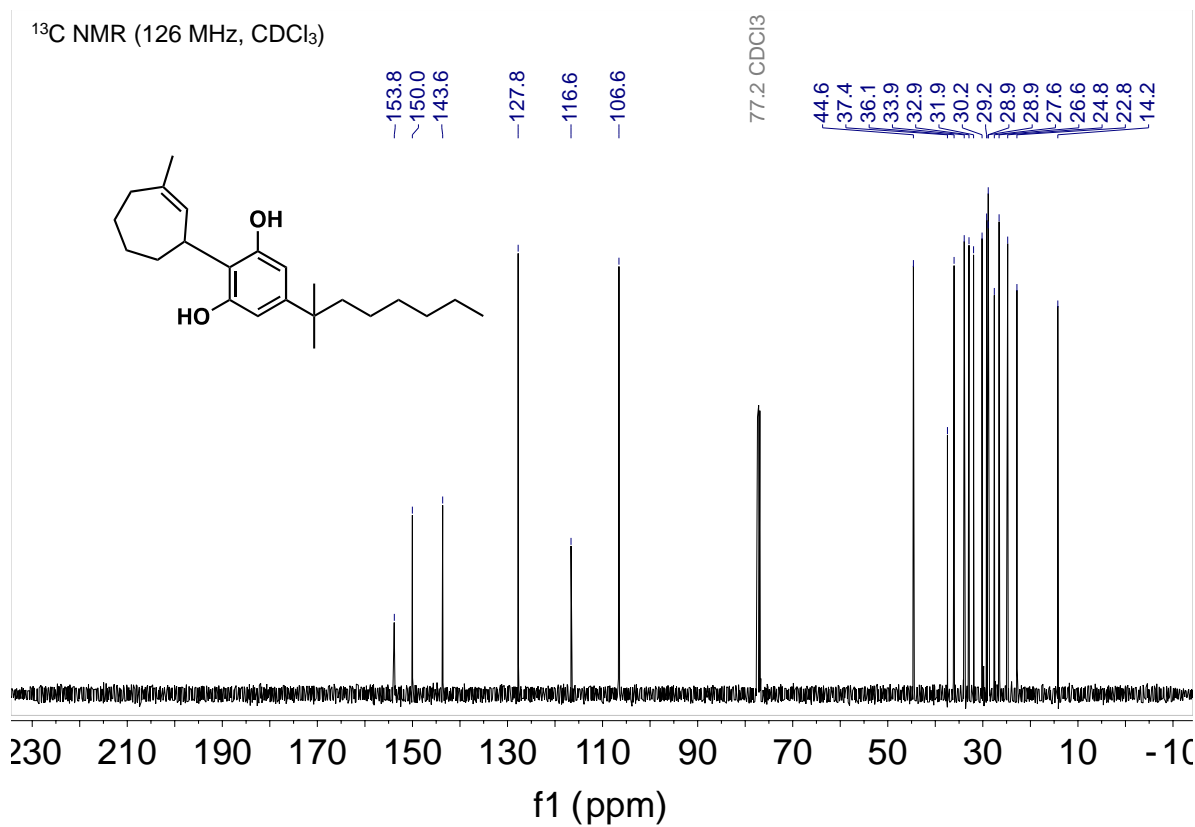

Supplement: NIHMS1944136-supplement-Millimaci_etl__2023_Suppl.pdf [file NIHMS1944136-supplement-Millimaci_etl__2023_Suppl.pdf]
