# Supplementary material
Source: PubMed Central journal article supplement (PMC10696561)
Supplement: NIHMS1944136-supplement-2.pdf [file NIHMS1944136-supplement-2.pdf]

## **ASSOCIATED CONTENT**

### **Data Availability Statement**

The data underlying this study are available in the published article and its Supporting Information.

### **Supporting Information**

The Supporting Information is available free of charge on the ACS Publications website.

Experimental procedures, analytical data,  $^1\text{H}$  and  $^{13}\text{C}$  NMR spectra of all newly synthesized compounds, and DFT calculation details (PDF).
